# Supplementary material for: Diastereodivergentcis- andtrans-fused [4 + 2] annulations of cyclic 1,3-dienes and 1-azadienesvialigand-controlled palladium catalysis
Source: Royal Society of Chemistry journal article supplement (doi:10.1039/d2sc06813c), 2023-01-01
Supplement: d2sc06813c1.pdf [file d2sc06813c1.pdf]

# Diastereodivergent *cis*- and *trans*-fused [4+2] annulations of cyclic 1,3-dienes and 1-azadienes via ligand-controlled palladium catalysis

Yuan Hu,<sup>a</sup> Jin-Yu Huang,<sup>a</sup> Ru-Jie Yan,<sup>a</sup> Zhi-Chao Chen,<sup>\*a</sup> Qin Ouyang,<sup>b</sup> Wei Du,<sup>a</sup> and Ying-Chun Chen<sup>\*ab</sup>

<sup>a</sup> Key Laboratory of Drug-Targeting and Drug Delivery System of the Education Ministry and Sichuan Province, and Sichuan Research Center for Drug Precision Industrial Technology, West China School of Pharmacy, Sichuan University, Chengdu 610041, China.

<sup>b</sup> College of Pharmacy, Third Military Medical University, Shapingba, Chongqing 400038, China.

\*Corresponding Authors: chenzhichao@scu.edu.cn; ycchen@scu.edu.cn

## Supplementary Information

|                                                                                                 |             |
|-------------------------------------------------------------------------------------------------|-------------|
| <b>1. General methods and materials.....</b>                                                    | <b>S1</b>   |
| <b>2. Preparation and characterization of ligand L15.....</b>                                   | <b>S2</b>   |
| <b>3. Detailed screening conditions .....</b>                                                   | <b>S3</b>   |
| 3.1 Preliminary ligand screenings for diastereodivergent [4+2] annulation.....                  | S3          |
| 3.2 Detailed screening conditions for asymmetric synthesis of <b>4a</b> .....                   | S4          |
| 3.3 Detailed screening conditions for asymmetric synthesis of <b>5a</b> .....                   | S4          |
| 3.4 Detailed screening conditions for asymmetric synthesis of <b>3a</b> .....                   | S6          |
| <b>4. General procedure for ligand-controlled diastereodivergent synthesis.....</b>             | <b>S6</b>   |
| 4.1 Procedure for synthesis of <b>3a</b> .....                                                  | S6          |
| 4.2 General procedure for asymmetric synthesis of <i>exo</i> - <b>4</b> .....                   | S7          |
| 4.3 General procedure for asymmetric synthesis of diastereomers <b>5</b> .....                  | S15         |
| <b>5. More substrate exploration.....</b>                                                       | <b>S22</b>  |
| 5.1 Exploration of more cyclic dienes and polyenes .....                                        | S22         |
| 5.2 Exploration of linear 1,3-dienes .....                                                      | S28         |
| 5.3 Exploration of linear electron-deficient heterodienes.....                                  | S31         |
| 5.4 Unsuccessful substrates attempts.....                                                       | S33         |
| <b>6. Mechanism investigation.....</b>                                                          | <b>S34</b>  |
| 6.1 Control experiments .....                                                                   | S34         |
| 6.2 Proposed origin of the divergent diastereoselectivity .....                                 | S35         |
| 6.3 DFT calculations for the reaction of 1-azadiene <b>2a</b> and 1,3-butadiene <b>15</b> ..... | S36         |
| <b>7. Crystal data and structural refinement.....</b>                                           | <b>S37</b>  |
| <b>8. NMR, HRMS spectra and HPLC chromatograms.....</b>                                         | <b>S49</b>  |
| <b>9. Computational method .....</b>                                                            | <b>S161</b> |

## 1. General methods and materials

Unless otherwise noted, the reactions were carried out under ambient atmosphere; when the reactions required heating, the heat source was oil bath.  $^1\text{H}$  NMR (400 or 600 MHz),  $^{13}\text{C}$  NMR (100 or 150 MHz),  $^{31}\text{P}$  NMR (162 MHz) and  $^{19}\text{F}$  NMR (375 MHz) spectra were recorded on Varian INOVA-400/54, Agilent DD2-600/54 or Bruker Ascend<sup>TM</sup> 400 instruments (Chemical shifts were reported in ppm from tetramethylsilane with the solvent resonance as the internal standard in  $\text{CDCl}_3$  solution, unless otherwise noted). The following abbreviations were used to explain the multiplicities: s = singlet, d = doublet, t = triplet, q = quartet, dd = double doublet, ddd = doublet of doublet of doublets, dt = doublet of triplets, m = multiplet, and coupling constants ( $J$ ) are reported in Hertz (Hz). High resolution mass spectra (HRMS) were recorded on a Waters SYNAPT G2, Agilent G1969-85000 or Shimadzu LCMS-IT-TOF using a time-of-flight mass spectrometer equipped with electrospray ionization (ESI) source. X-ray diffraction experiments were carried out on an Agilent Xcalibur or Bruker APEX-II CCD diffractometer, and the data obtained were deposited at the Cambridge Crystallographic Data Centre (CCDC 2050823, 2050825–2050826 and 2219802–2219806). In each case, enantiomeric excess was determined by HPLC (Agilent Technologies: 1220 Infinity II, 1200 Series, 1260 Infinity) analysis on a chiral column in comparison with authentic racemate, using a Daicel Chiralpak AD-H Column (250 × 4.6 mm), Chiralpak IB Column (250 × 4.6 mm), Chiralpak IC Column (250 × 4.6 mm), Chiralpak ID Column (250 × 4.6 mm), Chiralpak IE Column (250 × 4.6 mm), Chiralpak IF Column (250 × 4.6 mm), Chiralpak IG Column (250 × 4.6 mm), Chiralpak IH Column (250 × 4.6 mm). UV detection was monitored at 254 nm. The specific optical rotation was obtained from Rudolph Research Analytical Autopol I automatic polarimeter in  $\text{CHCl}_3$  solution at 25 °C. The melting point was obtained from WRX-4 Mel-Temp apparatus. Column chromatography was performed on silica gel (300–400 mesh) eluting with ethyl acetate (EtOAc)/petroleum ether or dichloromethane (DCM)/petroleum ether. TLC was performed on glass-backed silica plates. UV light,  $\text{I}_2$ , and solution of potassium permanganate were used to visualize products or starting materials. Experiments involving moisture and/or air sensitive components were performed under a positive pressure of argon in oven-dried glassware equipped with a rubber septum inlet. Toluene was freshly distilled from  $\text{CaH}_2$  under an atmosphere of dry argon. Dried solvents and liquid reagents were transferred via oven-dried syringe. Petroleum ether and EtOAc were distilled. 1,3-Cyclohexadiene **1a**, cycloheptadiene **6** and cycloheptatriene **10** were used without purification as commercially available. Dicyclopentadiene was cracked at 170 °C and re-

distilled to give 1,3-cyclopentadiene **13**. The ligand **L7**,<sup>1</sup> **L12**,<sup>1</sup> **1b**,<sup>2</sup> 1-azadiene **2**,<sup>3</sup> 1,3-diene **15**,<sup>4</sup> internal diene **18**,<sup>5</sup> 2-*N*-tosyliminoacrylate **22**<sup>6</sup> and 1-oxadiene **24**<sup>7</sup> were prepared according to the literature procedures.

- (1) X. Song, J. Zhang, Y. X. Wu, Q. Ouyang, W. Du and Y.-C. Chen, *J. Am. Chem. Soc.*, 2022, **144**, 9564–9569.
- (2) H. E. Burks, L. T. Kliman and J. P. Morken, *J. Am. Chem. Soc.*, 2009, **131**, 9134–9135.
- (3) Z.-Q. Rong, M. Wang, C. H. E. Chow and Y. Zhao, *Chem. Eur. J.*, 2016, **22**, 9483–9487.
- (4) A. Lishchynskiy and K. Muñiz, *Chem. Eur. J.*, 2022, **18**, 2212–2216.
- (5) F. Carlet, G. Bertarini, G. Brogini and G. Poli, *Eur. J. Org. Chem.*, 2021, 2162–2168.
- (6) H. Liu, Q. Zhang, L. Wang and X. Tong, *Chem. Eur. J.*, 2010, **16**, 1968–1972.
- (7) A. P. Dieskau, M. S. Holzwarth and B. Plietker, *J. Am. Chem. Soc.*, 2012, **134**, 5048–5051.

## 2. Preparation and characterization of ligand **L15**

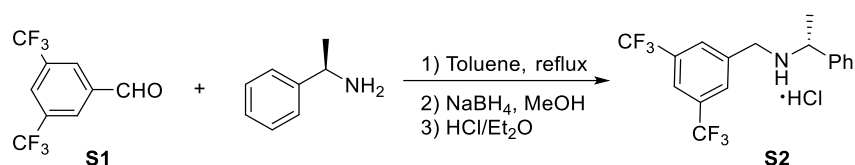

The mixture of **S1** (2.42 g, 10.0 mmol) and (*R*)-1-phenylethylamine (1.21 g, 10.0 mmol) in toluene (12 mL) was stirred at 110 °C for 2 h. After cooled to room temperature, anhydrous MgSO<sub>4</sub> (30.0 g) was added to the mixture and stirred for 30 min, followed by filtration and concentration. The residue was dissolved in methanol (20.0 mL), and NaBH<sub>4</sub> (378.0 mg, 10.00 mmol) was added in three portions at 0 °C. After 30 min, the mixture was quenched with water (20.0 mL), and extracted with EtOAc (20 mL × 3). The combined organic layers were washed with brine, dried over anhydrous Na<sub>2</sub>SO<sub>4</sub>, filtered and concentrated in vacuo. Then concentrated HCl (aq) (2.0 mL) was added dropwise to the solution of the crude secondary amine in diethyl ether (10.0 mL). The white precipitates were filtered and washed with EtOAc to afford **S2** (3.0 g, 86% yield).

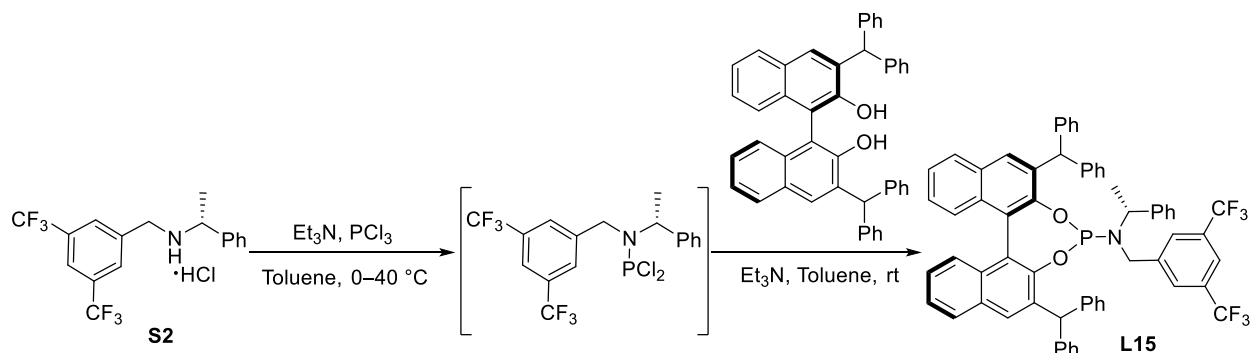

of  $\text{PCl}_3$  (0.11 mL, 1.2 mmol, 6.0 equiv) in dry toluene (1.0 mL) under argon atmosphere. The resultant mixture was gradually warmed to 40 °C before **S2** (154.0 mg, 0.4000 mmol, 2.0 equiv) was added. After stirred for additional 4 h, the mixture was concentrated in vacuo. The residue was dissolved in dry toluene, and (*R*)-3,3'-dibenzhydryl-[1,1'-binaphthalene]-2,2'-diol (124.0 mg, 0.2000 mmol) and triethylamine (0.10 mL, 1.2 mmol, 6.0 equiv) were added sequentially under argon atmosphere. Then the mixture was stirred at room temperature for 12 h. The mixture was concentrated, and the residue was purified by flash chromatography on silica gel (EtOAc/petroleum ether = 1/100) to give ligand **L15**: 94 mg (0.095 mmol), as a white solid, 47% yield; mp = 141–143 °C;  $[\alpha]_{\text{D}}^{25} = -139.0$  ( $c = 0.41$  in  $\text{CHCl}_3$ );  $^1\text{H NMR}$  (400 MHz,  $\text{CDCl}_3$ )  $\delta$  (ppm) 7.71 (d,  $J = 8.2$  Hz, 1H), 7.66 (d,  $J = 8.2$  Hz, 1H), 7.60 (s, 1H), 7.54 (s, 2H), 7.45 (d,  $J = 5.4$  Hz, 2H), 7.41–6.96 (m, 29H), 6.90–6.77 (m, 2H), 6.29 (s, 1H), 5.80 (s, 1H), 4.18 (d,  $J = 15.7$  Hz, 1H), 4.09–3.88 (m, 1H), 3.47 (d,  $J = 15.6$  Hz, 1H), 1.35 (dd,  $J = 7.3, 2.5$  Hz, 3H);  $^{13}\text{C NMR}$  (150 MHz,  $\text{CDCl}_3$ )  $\delta$  (ppm) 148.71, 148.67, 147.7, 143.9, 143.7, 142.9, 142.6, 142.1, 142.0, 141.6, 135.8, 135.1, 132.4, 132.0, 131.8, 131.4, 131.2, 130.9 (d,  $^2J_{\text{FC}} = 33.0$  Hz), 130.8, 130.5, 130.1, 129.89, 129.86, 128.8, 128.7, 128.6, 128.4, 128.31, 128.28, 128.12, 128.07, 128.0, 127.5, 127.4, 127.0, 126.9, 126.7, 126.49, 126.45, 126.3, 125.8, 125.7, 124.9, 124.6, 124.3, 123.4 (d,  $^1J_{\text{FC}} = 272.2$  Hz), 122.13, 122.10, 120.6 (m), 57.5 (d,  $J = 34.7$  Hz), 51.0, 50.3, 47.3 (d,  $J = 4.6$  Hz), 21.7 (d,  $J = 24.3$  Hz);  $^{19}\text{F NMR}$  (375 MHz,  $\text{CDCl}_3$ )  $\delta$  (ppm) –62.6;  $^{31}\text{P NMR}$  (162 MHz,  $\text{CDCl}_3$ ):  $\delta$  (ppm) 139.4 (d,  $J = 12.0$  Hz); HRMS (ESI-TOF)  $m/z$ :  $[\text{M} + \text{H}]^+$  Calcd for  $\text{C}_{63}\text{H}_{47}\text{F}_6\text{NO}_2\text{P}^+$  994.3243; Found 994.3246.

### 3. Detailed screening conditions

#### 3.1 Preliminary ligand screenings for diastereodivergent [4+2] annulation

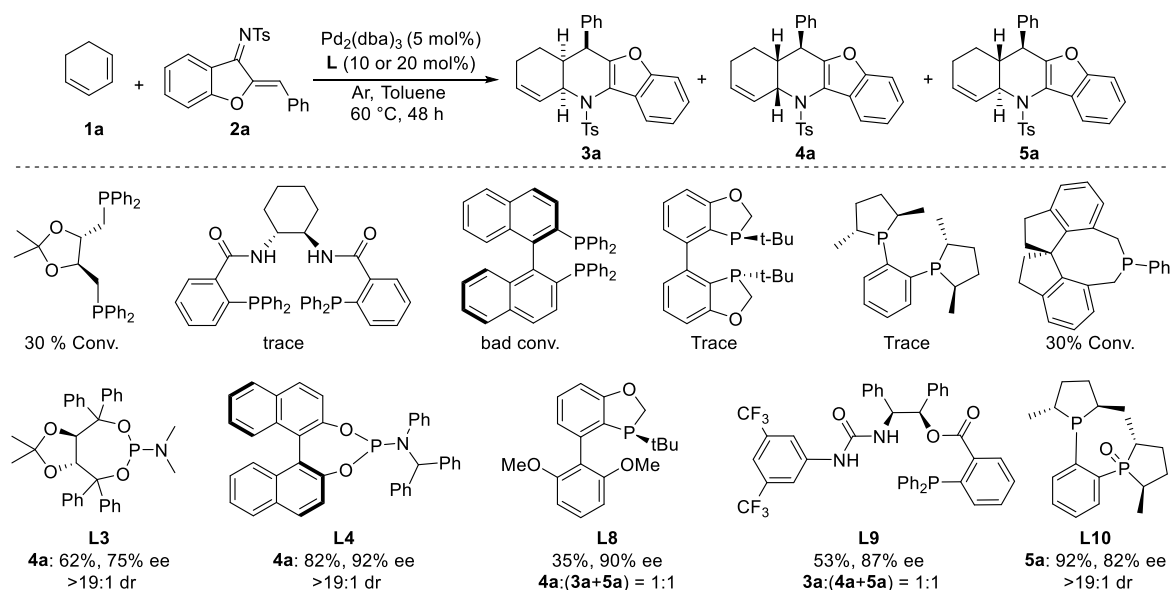

A series of chiral ligands derived from different backbones were investigated. As outlined above, phosphoramidite ligands **L3** and **L4** led to the exclusive formation of **4a**, while 1,2-aminoalcohol-derived **L9** and (*R,R*)-Me-DuPhos monoxide **L10** were favourable to produce **3a** and **5a**, respectively. More relevant ligands and other parameters were screened subsequently in order to realise the diastereodivergent synthesis.

### 3.2 Detailed screening conditions for asymmetric synthesis of **4a**

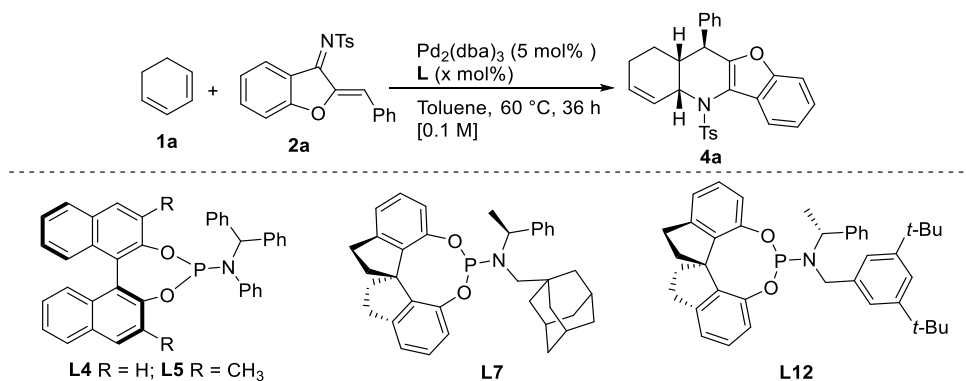

| Entry          | L          | x  | Yield (%) <sup>b</sup> | <b>4a</b> :( <b>3a</b> + <b>5a</b> ) <sup>c</sup> | ee (%) <sup>d</sup> |
|----------------|------------|----|------------------------|---------------------------------------------------|---------------------|
| 1              | <b>L4</b>  | 20 | 82                     | >19:1                                             | 93                  |
| 2              | <b>L5</b>  | 20 | 30                     | 4:1                                               | 71                  |
| 3              | <b>L7</b>  | 20 | 95                     | >19:1                                             | 98                  |
| 4              | <b>L7</b>  | 10 | 95                     | >19:1                                             | 98                  |
| 5 <sup>e</sup> | <b>L7</b>  | 10 | 50                     | >19:1                                             | 98                  |
| 6              | <b>L12</b> | 10 | 60                     | >19:1                                             | 91                  |

<sup>a</sup> Unless noted otherwise, reactions were performed with **1a** (0.1 mmol), **2a** (0.05 mmol), Pd<sub>2</sub>(dba)<sub>3</sub> (5 mol%), **L** (x mol%) in dry toluene (0.5 mL) at 60 °C for 36 h under Ar. <sup>b</sup> Yield of isolated product. <sup>c</sup> Determined by <sup>1</sup>H NMR analysis. <sup>d</sup> The data referred to ee of **4a**, determined by HPLC analysis on a chiral stationary phase. <sup>e</sup> Pd<sub>2</sub>(dba)<sub>3</sub> (2.5 mol%).

### 3.3 Detailed screening conditions for asymmetric synthesis of **5a**

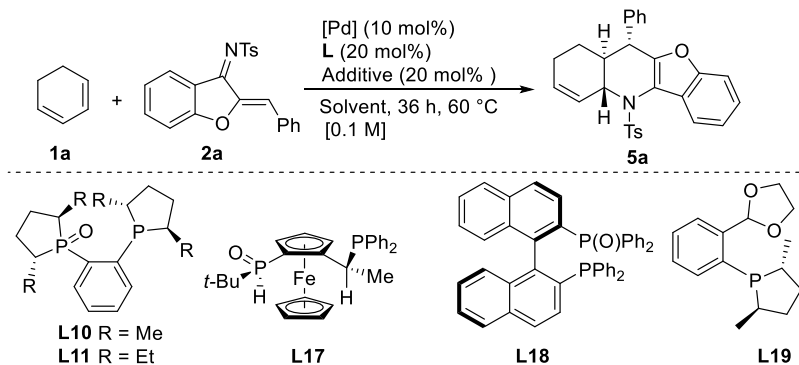

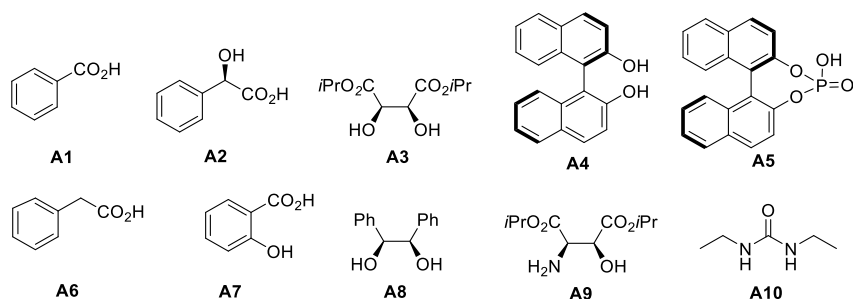

| Entry           | [Pd]                                                | L          | Solvent                         | Additive   | Yield (%) <sup>b</sup> | 5a:(3a+4a) <sup>c</sup> | ee (%) <sup>d</sup> |
|-----------------|-----------------------------------------------------|------------|---------------------------------|------------|------------------------|-------------------------|---------------------|
| 1               | Pd <sub>2</sub> (dba) <sub>3</sub>                  | <b>L10</b> | Toluene                         | /          | 92                     | >19:1                   | 82                  |
| 2               | Pd <sub>2</sub> (dba) <sub>3</sub>                  | <b>L11</b> | Toluene                         | /          | Trace                  | /                       | /                   |
| 3               | Pd <sub>2</sub> (dba) <sub>3</sub>                  | <b>L17</b> | Toluene                         | /          | Trace                  | /                       | /                   |
| 4               | Pd <sub>2</sub> (dba) <sub>3</sub>                  | <b>L18</b> | Toluene                         | /          | Trace                  | /                       | /                   |
| 5               | Pd <sub>2</sub> (dba) <sub>3</sub>                  | <b>L19</b> | Toluene                         | /          | Trace                  | /                       | /                   |
| 6               | Pd <sub>2</sub> (dba) <sub>3</sub>                  | <b>L10</b> | THF                             | /          | 51                     | 10:1                    | 80                  |
| 7               | Pd <sub>2</sub> (dba) <sub>3</sub>                  | <b>L10</b> | 2-Me-THF                        | /          | 61                     | >19:1                   | 80                  |
| 8               | Pd <sub>2</sub> (dba) <sub>3</sub>                  | <b>L10</b> | PhCF <sub>3</sub>               | /          | 10                     | 7:1                     | 77                  |
| 9               | Pd <sub>2</sub> (dba) <sub>3</sub>                  | <b>L10</b> | Dioxane                         | /          | 35                     | 11:1                    | 82                  |
| 10              | Pd <sub>2</sub> (dba) <sub>3</sub>                  | <b>L10</b> | CH <sub>2</sub> Cl <sub>2</sub> | /          | 26                     | 7:3                     | 83                  |
| 11              | Pd <sub>2</sub> (dba) <sub>3</sub>                  | <b>L10</b> | CHCl <sub>3</sub>               | /          | 20                     | 1:2                     | 89                  |
| 12              | Pd <sub>2</sub> (dba) <sub>3</sub>                  | <b>L10</b> | Xylene                          | /          | Trace                  | /                       | /                   |
| 13              | Pd <sub>2</sub> (dba) <sub>3</sub>                  | <b>L10</b> | EtOAc                           | /          | Trace                  | /                       | /                   |
| 14              | Pd <sub>2</sub> (dba) <sub>3</sub>                  | <b>L10</b> | Anisole                         | /          | Trace                  | /                       | /                   |
| 15              | Pd <sub>2</sub> (dba) <sub>3</sub>                  | <b>L10</b> | Toluene                         | <b>A1</b>  | 33                     | >19:1                   | 83                  |
| 16              | Pd <sub>2</sub> (dba) <sub>3</sub>                  | <b>L10</b> | Toluene                         | <b>A2</b>  | 76                     | >19:1                   | 80                  |
| 17              | Pd <sub>2</sub> (dba) <sub>3</sub>                  | <b>L10</b> | Toluene                         | <b>A3</b>  | 75                     | >19:1                   | 80                  |
| 18              | Pd <sub>2</sub> (dba) <sub>3</sub>                  | <b>L10</b> | Toluene                         | <b>A4</b>  | 58                     | >19:1                   | 80                  |
| 19              | Pd <sub>2</sub> (dba) <sub>3</sub>                  | <b>L10</b> | Toluene                         | <b>A5</b>  | Trace                  | /                       | /                   |
| 20              | Pd <sub>2</sub> (dba) <sub>3</sub>                  | <b>L10</b> | Toluene                         | <b>A6</b>  | Trace                  | /                       | /                   |
| 21              | Pd <sub>2</sub> (dba) <sub>3</sub>                  | <b>L10</b> | Toluene                         | <b>A7</b>  | Trace                  | /                       | /                   |
| 22              | Pd <sub>2</sub> (dba) <sub>3</sub>                  | <b>L10</b> | Toluene                         | <b>A8</b>  | 73                     | >19:1                   | 80                  |
| 23              | Pd <sub>2</sub> (dba) <sub>3</sub>                  | <b>L10</b> | Toluene                         | <b>A9</b>  | 70                     | >19:1                   | 80                  |
| 24              | Pd <sub>2</sub> (dba) <sub>3</sub>                  | <b>L10</b> | Toluene                         | <b>A10</b> | 76                     | >19:1                   | 80                  |
| 25              | [Pd(allyl)Cl] <sub>2</sub>                          | <b>L10</b> | Toluene                         | /          | 90                     | >19:1                   | 80                  |
| 26              | Pd(OAc) <sub>2</sub>                                | <b>L10</b> | Toluene                         | /          | 39                     | >19:1                   | 80                  |
| 27              | Pd(CH <sub>3</sub> CN) <sub>2</sub> Cl <sub>2</sub> | <b>L10</b> | Toluene                         | /          | NR                     | /                       | /                   |
| 28 <sup>e</sup> | Pd <sub>2</sub> (dba) <sub>3</sub>                  | <b>L10</b> | Toluene                         | /          | 56                     | >19:1                   | 82                  |
| 29 <sup>f</sup> | Pd <sub>2</sub> (dba) <sub>3</sub>                  | <b>L10</b> | Toluene                         | /          | 25                     | >19:1                   | 82                  |

<sup>a</sup>Unless noted otherwise, reactions were performed with **1a** (0.1 mmol), **2a** (0.05 mmol), [Pd] source (10 mol%), **L** (20 mol%), acid additive (20 mol%) in dry toluene (0.5 mL) at 60 °C for 36 h under Ar. <sup>b</sup>Yield of isolated product. <sup>c</sup>Determined by HPLC analysis. <sup>d</sup>The data referred to ee of **5a**, determined by HPLC analysis on a chiral stationary phase. <sup>e</sup>At 50 °C. <sup>f</sup>With **L10** (10 mol%).

### 3.4 Detailed screening conditions for asymmetric synthesis of **3a**

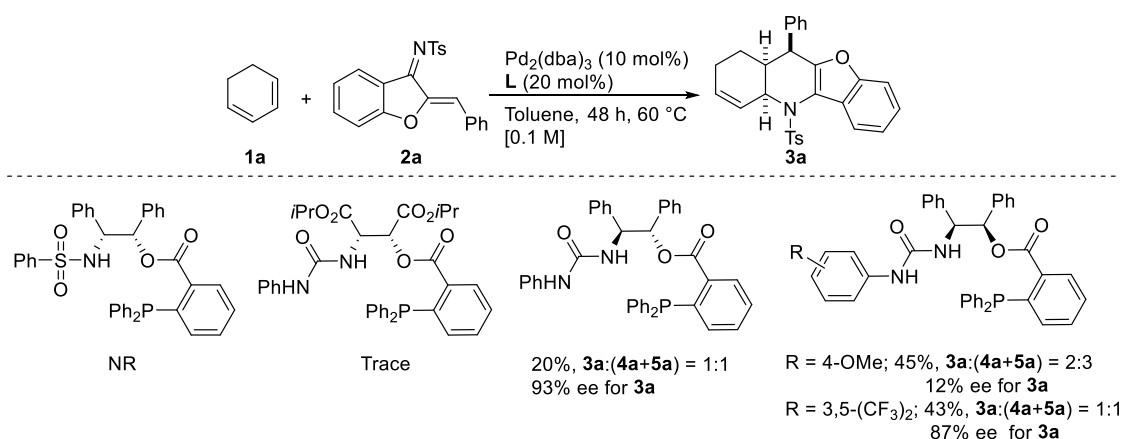

As the reaction of **1a** with **2a** could not proceed without palladium at 60 °C, the potential asymmetric synthesis of **3a** also might be achieved. Although a series of 1,2-aminoalcohol-driven bifunctional ligands were screened, bad diastereoselectivity was generally observed. As a result, currently successful construction of chiral *endo*-**3a** has not been realised yet.

## 4. General procedure for ligand-controlled diastereodivergent synthesis

### 4.1 Procedure for synthesis of **3a**

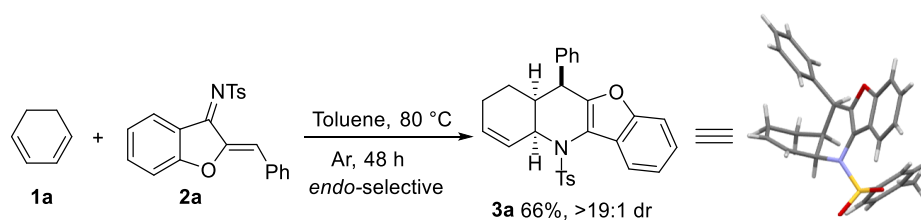

To an oven dried 10 mL Schlenk tube equipped with a stirring bar was added *N*-((*E*)-2-((*Z*)-benzylidene)benzofuran-3(2*H*)-ylidene)-4-methylbenzenesulfonamide **2a** (37.5 mg, 0.100 mmol, 1.0 equiv). The tube was capped, evacuated and back-filled with argon for five times. Then degassed dry toluene (0.5 mL) and 1,3-cyclohexadiene **1a** (19.0  $\mu\text{L}$ , 0.200 mmol, 2.0 equiv) were added via syringe sequentially under argon atmosphere. The mixture was stirred at 80 °C for 48 h. After complete consumption of **2a**, the mixture was directly purified by flash chromatography on silica gel

(EtOAc/petroleum ether = 1/50) to give product **3a**: 30.0 mg (0.0658 mmol), as a white solid, 66% yield; >19:1 dr; mp: 192–194 °C; <sup>1</sup>H NMR (400 MHz, CDCl<sub>3</sub>) δ (ppm) 8.17 (d, *J* = 7.2 Hz, 1H), 7.49 (d, *J* = 8.0 Hz, 2H), 7.39–7.28 (m, 3H), 7.28–7.11 (m, 5H), 7.05–6.97 (m, 2H), 5.72 (dd, *J* = 10.2, 2.6 Hz, 1H), 5.39–5.33 (m, 1H), 4.72–4.64 (m, 1H), 3.70 (d, *J* = 7.6 Hz, 1H), 2.42 (s, 3H), 2.08–1.98 (m, 1H), 1.74–1.62 (m, 1H), 1.61–1.43 (m, 2H), 0.62–0.42 (m, 1H); <sup>13</sup>C NMR (100 MHz, CDCl<sub>3</sub>) δ (ppm) 153.9, 148.6, 144.0, 138.0, 134.3, 132.0, 130.3, 129.7, 127.6, 127.5, 127.1, 126.9, 124.7, 124.3, 123.0, 122.4, 117.9, 111.2, 55.9, 41.9, 34.8, 22.0, 21.6, 21.5; HRMS (ESI-TOF) *m/z*: [M + Na]<sup>+</sup> Calcd for C<sub>28</sub>H<sub>25</sub>NO<sub>3</sub>SNa<sup>+</sup> 478.1447; Found 478.1456. *Its relative configuration has been determined by X-ray diffraction analysis.*

#### 4.2 General procedure for asymmetric synthesis of *exo-4*

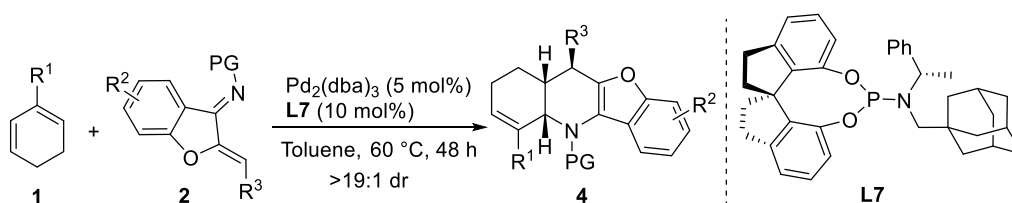

**General procedure:** To an oven dried 10 mL Schlenk tube equipped with a stirring bar were added 1-azadiene **2** (0.1 mmol, 1.0 equiv), Pd<sub>2</sub>(dba)<sub>3</sub> (5 mol%) and **L7** (10 mol%). The tube was capped, evacuated and back-filled with argon for five times. Then degassed dry toluene (1.0 mL) and 1,3-cyclohexadiene **1** (0.20 mmol, 2.0 equiv) were added via syringe sequentially under argon atmosphere. The mixture was stirred at 60 °C for 48 h. After complete consumption of **2**, the mixture was directly purified by flash chromatography on silica gel (petroleum ether/EtOAc) to afford product **4**.

*Note: Racemic 4 was obtained by using Pd<sub>2</sub>(dba)<sub>3</sub> in combination with racemic L7. The drs indicated the diastereomeric purity of the isolated products.*

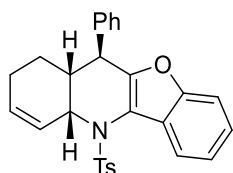

**Synthesis of 4a:** To an oven dried 10 mL Schlenk tube equipped with a stirring bar were added *N*-((*E*)-2-((*Z*)-benzylidene)benzofuran-3(2*H*)-ylidene)-4-methyl benzenesulfonamide **2a** (37.5 mg, 0.100 mmol, 1.0 equiv), Pd<sub>2</sub>(dba)<sub>3</sub> (4.6 mg, 0.0050 mmol, 5 mol%) and **L7** (5.5 mg, 0.010 mmol, 10 mol%). The tube was capped, evacuated and back-filled with argon for five times. Then degassed dry toluene (1.0 mL) and 1,3-cyclohexadiene **1a** (19.0 μL, 0.200 mmol, 2.0 equiv) were added via syringe sequentially under argon atmosphere. The mixture was stirred at 60 °C for 48 h. After complete consumption of **2a**, the mixture was directly purified by flash chromatography on silica gel (EtOAc/petroleum ether = 1/50)



to afford product **4a**: 43.1 mg (0.0948 mmol), as a white solid, 95% yield; mp 186–188 °C;  $[\alpha]_{\text{D}}^{25} = +248.2$  ( $c = 0.34$  in  $\text{CHCl}_3$ ); >19:1 dr; 98% ee, determined by HPLC analysis (Daicel Chiralpak IG, *n*-Hexane/*i*-PrOH = 90/10, flow rate = 1.0 mL/min,  $\lambda = 254$  nm)  $t_{\text{R}} = 15.12$  min (major),  $t_{\text{R}} = 19.19$  min (minor);  $^1\text{H}$  NMR (600 MHz,  $\text{CDCl}_3$ )  $\delta$  (ppm) 8.20 (d,  $J = 7.8$  Hz, 1H), 7.58 (d,  $J = 7.5$  Hz, 2H), 7.35–7.22 (m, 5H), 7.21–7.19 (m, 1H), 7.17–7.04 (m, 2H), 6.50 (d,  $J = 7.2$  Hz, 2H), 5.79–5.67 (m, 1H), 5.57 (d,  $J = 10.2$  Hz, 1H), 5.10–4.96 (m, 1H), 3.82 (d,  $J = 9.9$  Hz, 1H), 2.43 (s, 3H), 2.27–2.18 (m, 1H), 2.13–2.04 (m, 1H), 1.81–1.74 (m, 1H), 1.71–1.59 (m, 2H);  $^{13}\text{C}$  NMR (150 MHz,  $\text{CDCl}_3$ )  $\delta$  (ppm) 154.2, 150.0, 144.0, 139.7, 134.7, 129.94, 129.87, 128.33, 128.31, 128.1, 128.0, 127.2, 124.7, 124.4, 123.0, 122.4, 116.9, 111.1, 58.3, 39.3, 36.6, 22.1, 21.6, 20.5; HRMS (ESI-TOF)  $m/z$ :  $[\text{M} + \text{H}]^+$  Calcd for  $\text{C}_{28}\text{H}_{26}\text{NO}_3\text{S}^+$  456.1628; Found 456.1629.

**Asymmetric synthesis of 4a on a 1.0 mmol scale:** To an oven-dried 100 mL Schlenk tube equipped with a magnetic stirring bar were added *N*-((*E*)-2-((*Z*)-benzylidene)benzofuran-3(*2H*)-ylidene)-4-methylbenzenesulfonamide **2a** (375 mg, 1.00 mmol, 1.0 equiv),  $\text{Pd}_2(\text{dba})_3$  (46.0 mg, 0.0500 mmol, 5 mol%) and ligand **L7** (55.0 mg, 0.100 mmol, 10 mol%). The tube was capped, evacuated and back-filled with argon for five times. Then degassed dry toluene (10 mL) and 1,3-cyclohexadiene **1a** (191  $\mu\text{L}$ , 0.200 mmol, 2.0 equiv) were added via syringe sequentially under argon atmosphere. The mixture was stirred at 60 °C for 48 h. After complete consumption of **2a**, the mixture was concentrated and the residue was purified by flash chromatography on silica gel (EtOAc/petroleum ether = 1/50) to afford product **4a**: 421.2 mg (0.9245 mmol), as a white solid, 92% yield; >19:1 dr; 98% ee.

**Synthesis of ent-4a:** To an oven dried 10 mL Schlenk tube equipped with a stirring bar were added *N*-((*E*)-2-((*Z*)-benzylidene)benzofuran-3(*2H*)-ylidene)-4-methylbenzenesulfonamide **2a** (37.5 mg, 0.100 mmol, 1.0 equiv),  $\text{Pd}_2(\text{dba})_3$  (4.6 mg, 0.0050 mmol, 5 mol%) and *ent*-**L7** (5.5 mg, 0.010 mmol, 10 mol%). The tube was capped, evacuated and back-filled with argon for five times. Then degassed dry toluene (1.0 mL) and 1,3-cyclohexadiene **1a** (19.0  $\mu\text{L}$ , 0.200 mmol, 2.0 equiv) were added via syringe sequentially under argon atmosphere. The mixture was stirred at 60 °C for 48 h. After complete consumption of **2a**, the mixture was directly purified by flash chromatography on silica gel (EtOAc/petroleum ether = 1/50) to afford product *ent*-**4a**: 41.8 mg (0.0917 mmol), as a white solid, 92% yield;  $[\alpha]_{\text{D}}^{25} = -260.0$  ( $c = 0.33$  in  $\text{CHCl}_3$ ); >19:1 dr; 97% ee, determined by HPLC analysis (Daicel Chiralpak IG, *n*-Hexane/*i*-PrOH = 90/10, flow rate = 1.0 mL/min,  $\lambda = 254$  nm)  $t_{\text{R}} = 14.92$  min (minor),  $t_{\text{R}} = 18.63$  min (major).

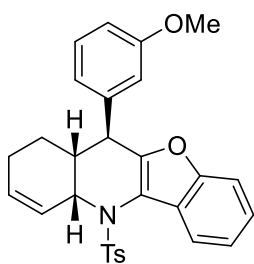

**Synthesis of 4b:** To an oven dried 10 mL Schlenk tube equipped with a stirring bar were added *N*-((*E*)-2-((*Z*)-3-methoxybenzylidene)benzofuran-3(*2H*)-ylidene)-4-methylbenzenesulfonamide **2b** (40.5 mg, 0.100 mmol, 1.0 equiv), Pd<sub>2</sub>(dba)<sub>3</sub> (4.6 mg, 0.0050 mmol, 5 mol%) and **L7** (5.5 mg, 0.010 mmol, 10 mol%). The tube was capped, evacuated and back-filled with argon for five

times. Then degassed dry toluene (1.0 mL) and 1,3-cyclohexadiene **1a** (19.0 μL, 0.200 mmol, 2.0 equiv) were added via syringe sequentially under argon atmosphere. The mixture was stirred at 60 °C for 48 h. After complete consumption of **2b**, the mixture was directly purified by flash chromatography on silica gel (EtOAc/petroleum ether = 1/50) to afford product **4b**: 44.3 mg (0.0912 mmol), as a white solid, 91% yield; mp 199–201 °C; [α]<sub>D</sub><sup>25</sup> = +272.6 (*c* = 0.27 in CHCl<sub>3</sub>); >19:1 dr; 98% ee, determined by HPLC analysis (Daicel Chiralpak IG, *n*-Hexane/*i*-PrOH = 90/10, flow rate = 1.0 mL/min, λ = 254 nm) t<sub>R</sub> = 19.89 min (major), t<sub>R</sub> = 22.13 min (minor); <sup>1</sup>H NMR (400 MHz, CDCl<sub>3</sub>) δ (ppm) 8.20 (d, *J* = 7.6 Hz, 1H), 7.57 (d, *J* = 7.9 Hz, 2H), 7.35–7.25 (m, 5H), 7.11–7.02 (m, 1H), 6.74 (dd, *J* = 8.2, 2.5 Hz, 1H), 6.16 (s, 1H), 6.11 (d, *J* = 7.5 Hz, 1H), 5.77–5.67 (m, 1H), 5.57 (d, *J* = 10.3 Hz, 1H), 5.09–4.96 (m, 1H), 3.80 (d, *J* = 10.0 Hz, 1H), 3.75 (s, 3H), 2.41 (s, 3H), 2.29–2.15 (m, 1H), 2.14–2.00 (m, 1H), 1.84–1.71 (m, 1H), 1.71–1.60 (m, 2H); <sup>13</sup>C NMR (150 MHz, CDCl<sub>3</sub>) δ (ppm) 159.7, 154.2, 149.8, 144.3, 141.2, 134.6, 130.0, 129.9, 129.3, 128.3, 127.9, 124.7, 124.4, 122.9, 122.5, 120.6, 117.0, 115.2, 111.2, 111.1, 58.3, 55.1, 39.2, 36.3, 22.2, 21.5, 20.6; HRMS (ESI-TOF) *m/z*: [M + H]<sup>+</sup> Calcd for C<sub>29</sub>H<sub>28</sub>NO<sub>4</sub>S<sup>+</sup> 486.1734; Found 486.1741.

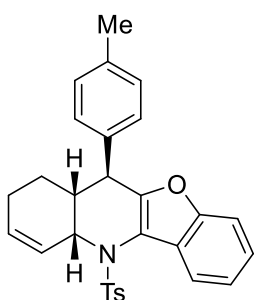

**Synthesis of 4c:** To an oven dried 10 mL Schlenk tube equipped with a stirring bar were added 4-methyl-*N*-((*E*)-2-((*Z*)-4-methylbenzylidene)benzofuran-3(*2H*)-ylidene)benzenesulfonamide **2c** (38.9 mg, 0.100 mmol, 1.0 equiv), Pd<sub>2</sub>(dba)<sub>3</sub> (4.6 mg, 0.0050 mmol, 5 mol%) and **L7** (5.5 mg, 0.010 mmol, 10 mol%). The tube was capped, evacuated and back-filled with argon for five

times. Then degassed dry toluene (1.0 mL) and 1,3-cyclohexadiene **1a** (19.0 μL, 0.200 mmol, 2.0 equiv) were added via syringe sequentially under argon atmosphere. The mixture was stirred at 60 °C for 48 h. After complete consumption of **2c**, the mixture was directly purified by flash chromatography on silica gel (EtOAc/petroleum ether = 1/50) to afford product **4c**: 42.3 mg (0.0901 mmol), as a white solid, 90% yield; mp 174–176 °C; [α]<sub>D</sub><sup>25</sup> = +231.1 (*c* = 0.33 in

CHCl<sub>3</sub>); >19:1 dr; 97% ee, determined by HPLC analysis (Daicel Chiralpak IG, *n*-Hexane/*i*-PrOH = 90/10, flow rate = 1.0 mL/min,  $\lambda$  = 254 nm)  $t_R$  = 14.98 min (major),  $t_R$  = 19.85 min (minor); <sup>1</sup>H NMR (400 MHz, CDCl<sub>3</sub>)  $\delta$  (ppm) 8.20 (d,  $J$  = 7.7, 1H), 7.71–7.49 (m, 2H), 7.34–7.21 (m, 5H), 6.94 (d,  $J$  = 7.8 Hz, 2H), 6.49–6.29 (m, 2H), 5.81–5.65 (m, 1H), 5.59–5.55 (m, 1H), 5.04–5.02 (m, 1H), 3.79 (d,  $J$  = 9.9 Hz, 1H), 2.44 (s, 3H), 2.29 (s, 3H), 2.22–2.19 (m, 1H), 2.12–2.04 (m, 1H), 1.78–1.73 (m, 1H), 1.71–1.58 (m, 2H); <sup>13</sup>C NMR (100 MHz, CDCl<sub>3</sub>)  $\delta$  (ppm) 154.2, 150.3, 144.1, 137.0, 136.6, 134.8, 129.92, 129.85, 129.1, 128.4, 128.1, 124.8, 124.4, 123.0, 122.4, 116.9, 111.2, 58.3, 38.9, 36.6, 22.2, 21.6, 21.1, 20.6; HRMS (ESI-TOF)  $m/z$ : [M + H]<sup>+</sup> Calcd for C<sub>29</sub>H<sub>28</sub>NO<sub>3</sub>S<sup>+</sup> 470.1784; Found 470.1793.

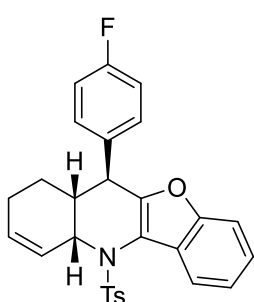

**Synthesis of 4d:** To an oven dried 10 mL Schlenk tube equipped with a stirring bar were added *N*-((*E*)-2-((*Z*)-4-fluorobenzylidene)benzofuran-3(*2H*)-ylidene)-4-methylbenzenesulfonamide **2d** (39.3 mg, 0.100 mmol, 1.0 equiv), Pd<sub>2</sub>(dba)<sub>3</sub> (4.6 mg, 0.0050 mmol, 5 mol%) and **L7** (5.5 mg, 0.010 mmol, 10 mol%). The tube was capped, evacuated and back-filled with argon for five times. Then degassed dry toluene (1.0 mL) and 1,3-cyclohexadiene **1a** (19.0

$\mu$ L, 0.200 mmol, 2.0 equiv) were added via syringe sequentially under argon atmosphere. The mixture was stirred at 60 °C for 48 h. After complete consumption of **2d**, the mixture was directly purified by flash chromatography on silica gel (EtOAc/petroleum ether = 1/50) to afford product **4d**: 47.0 mg (0.0992 mmol), as a white solid, 99% yield; mp 187–189 °C;  $[\alpha]_D^{25}$  = +213.8 ( $c$  = 0.58 in CHCl<sub>3</sub>); >19:1 dr; 98% ee, determined by HPLC analysis (Daicel Chiralpak IG, *n*-Hexane/*i*-PrOH = 90/10, flow rate = 1.0 mL/min,  $\lambda$  = 254 nm)  $t_R$  = 14.60 min (major),  $t_R$  = 19.85 min (minor); <sup>1</sup>H NMR (400 MHz, CDCl<sub>3</sub>)  $\delta$  (ppm) 8.20 (d,  $J$  = 7.6 Hz, 1H), 7.70–7.46 (m, 2H), 7.50–7.14 (m, 5H), 6.94–6.68 (m, 2H), 6.64–6.29 (m, 2H), 5.74–5.70 (m, 1H), 5.57 (dt,  $J$  = 10.2, 2.0 Hz, 1H), 5.07–5.00 (m, 1H), 3.81 (d,  $J$  = 9.9 Hz, 1H), 2.45 (s, 3H), 2.33–1.93 (m, 2H), 1.73–1.64 (m, 2H), 1.61–1.59 (m, 1H); <sup>13</sup>C NMR (100 MHz, CDCl<sub>3</sub>)  $\delta$  (ppm) 161.9 (d, <sup>1</sup> $J_{FC}$  = 246.2 Hz), 154.2, 149.7, 144.1, 135.39, 135.36, 134.8, 129.91, 129.87, 129.6 (d, <sup>3</sup> $J_{FC}$  = 7.9 Hz), 128.3, 128.1, 124.64, 124.56, 123.1, 122.5, 117.0, 115.3 (d, <sup>2</sup> $J_{FC}$  = 21.3 Hz), 111.1, 58.3, 38.5, 36.7, 22.0, 21.6, 20.5; <sup>19</sup>F NMR (375 MHz, CDCl<sub>3</sub>)  $\delta$  (ppm) –115.1; HRMS (ESI-TOF)  $m/z$ : [M + Na]<sup>+</sup> Calcd for C<sub>28</sub>H<sub>24</sub>FNO<sub>3</sub>SN<sup>+</sup> 496.1353; Found 496.1359.

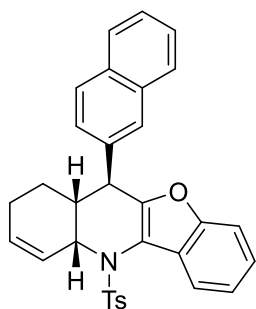

**Synthesis of 4e:** To an oven dried 10 mL Schlenk tube equipped with a stirring bar were added 4-methyl-*N*-((*2Z,3E*)-2-(naphthalen-2-ylmethylene)-benzofuran-3(*2H*)-ylidene)benzenesulfonamide **2e** (42.6 mg, 0.100 mmol, 1.0 equiv), Pd<sub>2</sub>(dba)<sub>3</sub> (4.6 mg, 0.0050 mmol, 5 mol%) and **L7** (5.5 mg, 0.010 mmol, 10 mol%). The tube was capped, evacuated and back-filled with argon for five times. Then degassed dry toluene (1.0 mL) and 1,3-cyclohexadiene **1a** (19.0

μL, 0.200 mmol, 2.0 equiv) were added via syringe sequentially under argon atmosphere. The mixture was stirred at 60 °C for 48 h. After complete consumption of **2e**, the mixture was directly purified by flash chromatography on silica gel (EtOAc/petroleum ether = 1/50) to afford product **4e**: 44.6 mg (0.0882 mmol), as a white solid, 88% yield; mp 240–242 °C; [α]<sub>D</sub><sup>25</sup> = +343.4 (*c* = 0.39 in CHCl<sub>3</sub>); >19:1 dr; 97% ee, determined by HPLC analysis (Daicel Chiralpak IG, *n*-Hexane/*i*-PrOH = 90/10, flow rate = 1.0 mL/min, λ = 254 nm) t<sub>R</sub> = 19.67 min (major), t<sub>R</sub> = 25.58 min (minor); <sup>1</sup>H NMR (400 MHz, CDCl<sub>3</sub>) δ (ppm) 8.24 (d, *J* = 7.9 Hz, 1H), 7.81–7.73 (m, 1H), 7.71–7.58 (m, 3H), 7.54 (d, *J* = 8.5 Hz, 1H), 7.50–7.38 (m, 2H), 7.37–7.18 (m, 7H), 6.38 (dd, *J* = 8.4, 1.8 Hz, 1H), 5.81–5.71 (m, 1H), 5.66–5.56 (m, 1H), 5.14–5.02 (m, 1H), 4.01 (d, *J* = 9.9 Hz, 1H), 2.45 (s, 3H), 2.37–2.24 (m, 1H), 2.22–2.01 (m, 1H), 1.89–1.84 (m, 1H), 1.70–1.63 (m, 2H); <sup>13</sup>C NMR (100 MHz, CDCl<sub>3</sub>) δ (ppm) 154.2, 149.9, 144.2, 137.0, 134.8, 133.2, 132.6, 130.01, 129.99, 128.3, 128.1, 127.6, 127.5, 127.4, 126.2, 125.9, 125.6, 124.7, 124.5, 123.0, 122.5, 117.2, 111.1, 58.3, 39.4, 36.4, 22.1, 21.7, 20.7; HRMS (ESI-TOF) *m/z*: [M + Na]<sup>+</sup> Calcd for C<sub>32</sub>H<sub>27</sub>NO<sub>3</sub>SNa<sup>+</sup> 528.1604; Found 528.1609.

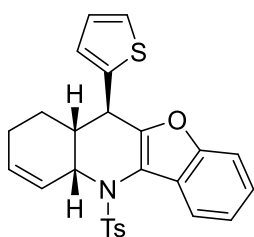

**Synthesis of 4f:** To an oven dried 10 mL Schlenk tube equipped with a stirring bar were added 4-methyl-*N*-((*2Z,3E*)-2-(thiophen-2-ylmethylene)benzofuran-3(*2H*)-ylidene)benzenesulfonamide **2f** (38.1 mg, 0.100 mmol, 1.0 equiv), Pd<sub>2</sub>(dba)<sub>3</sub> (4.6 mg, 0.0050 mmol, 5 mol%) and **L7** (5.5 mg, 0.010 mmol, 10 mol%). The tube was capped, evacuated and back-filled with argon for five

times. Then degassed dry toluene (1.0 mL) and 1,3-cyclohexadiene **1a** (19.0 μL, 0.200 mmol, 2.0 equiv) were added via syringe sequentially under argon atmosphere. The mixture was stirred at 60 °C for 48 h. After complete consumption of **2f**, the mixture was directly purified by flash chromatography on silica gel (EtOAc/petroleum ether = 1/50) to afford product **4f**: 44.4 mg (0.0962 mmol), as a white solid, 96% yield; mp 169–171 °C; [α]<sub>D</sub><sup>25</sup> = +216.6 (*c* = 0.27 in CHCl<sub>3</sub>); >19:1 dr; 97% ee, determined by HPLC analysis (Daicel Chiralpak IG, *n*-Hexane/*i*-PrOH = 90/10, flow rate

=1.0 mL/min,  $\lambda = 254$  nm)  $t_R = 16.48$  min (major),  $t_R = 20.26$  min (minor);  $^1\text{H}$  NMR (400 MHz,  $\text{CDCl}_3$ )  $\delta$  (ppm) 8.24–8.13 (m, 1H), 7.55 (d,  $J = 8.3$  Hz, 2H), 7.36–7.30 (m, 2H), 7.29 (d,  $J = 2.0$  Hz, 1H), 7.28–7.24 (m, 2H), 7.12 (dd,  $J = 5.1, 1.2$  Hz, 1H), 6.87 (dd,  $J = 5.2, 3.5$  Hz, 1H), 6.51 (dd,  $J = 3.6, 1.2$  Hz, 1H), 5.72–5.68 (m, 1H), 5.56 (dt,  $J = 10.2, 2.0$  Hz, 1H), 5.03–4.90 (m, 1H), 4.17 (d,  $J = 9.9$  Hz, 1H), 2.41 (s, 3H), 2.25–1.98 (m, 2H), 1.83–1.63 (m, 3H);  $^{13}\text{C}$  NMR (100 MHz,  $\text{CDCl}_3$ )  $\delta$  (ppm) 154.2, 148.7, 144.1, 142.0, 134.5, 130.03, 129.97, 128.2, 127.8, 126.6, 126.0, 124.7, 124.6, 124.4, 123.0, 122.7, 116.5, 111.2, 58.1, 36.6, 34.4, 22.6, 21.6, 20.4; HRMS (ESI-TOF)  $m/z$ :  $[\text{M} + \text{Na}]^+$  Calcd for  $\text{C}_{26}\text{H}_{23}\text{NO}_3\text{S}_2\text{Na}^+$  484.1012; Found 484.1021.

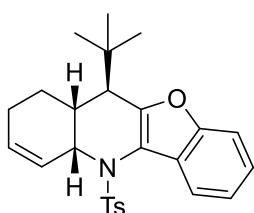

**Synthesis of 4g:** To an oven dried 10 mL Schlenk tube equipped with a stirring bar were added *N*-((2*Z*,3*E*)-2-(2,2-dimethylpropylidene)benzofuran-3(2*H*)-ylidene)-4-methylbenzenesulfonamide **2g** (35.5 mg, 0.100 mmol, 1.0 equiv),  $\text{Pd}_2(\text{dba})_3$  (4.6 mg, 0.0050 mmol, 5 mol%) and **L7** (5.5 mg, 0.010 mmol, 10 mol%).

The tube was capped, evacuated and back-filled with argon for five times. Then degassed dry toluene (1.0 mL) and 1,3-cyclohexadiene **1a** (19.0  $\mu\text{L}$ , 0.200 mmol, 2.0 equiv) were added via syringe sequentially under argon atmosphere. The mixture was stirred at 60  $^\circ\text{C}$  for 48 h. After complete consumption of **2g**, the mixture was directly purified by flash chromatography on silica gel (EtOAc/petroleum ether = 1/50) to afford product **4g**: 40.0 mg (0.0918 mmol), as a white solid, 92% yield; mp 173–175  $^\circ\text{C}$ ;  $[\alpha]_{\text{D}}^{25} = +60$  ( $c = 0.37$  in  $\text{CHCl}_3$ ); >19:1 dr; 98% ee, determined by HPLC analysis (Daicel Chiralpak IC, *n*-Hexane/*i*-PrOH = 90/10, flow rate = 1.0 mL/min,  $\lambda = 254$  nm)  $t_R = 8.38$  min (major),  $t_R = 17.07$  min (minor);  $^1\text{H}$  NMR (400 MHz,  $\text{CDCl}_3$ )  $\delta$  (ppm) 8.10–7.96 (m, 1H), 7.79–7.67 (m, 2H), 7.45–7.33 (m, 1H), 7.29–7.21 (m, 4H), 5.66–5.61 (m, 1H), 5.30–5.29 (m, 1H), 4.90–4.70 (m, 1H), 2.62 (d,  $J = 7.8$  Hz, 1H), 2.39 (s, 3H), 2.37–2.28 (m, 1H), 2.19–2.08 (m, 1H), 2.02–1.79 (m, 3H), 0.74 (s, 9H);  $^{13}\text{C}$  NMR (100 MHz,  $\text{CDCl}_3$ )  $\delta$  (ppm) 153.72, 153.66, 143.8, 136.6, 130.8, 129.8, 128.9, 128.0, 124.9, 123.9, 122.8, 121.4, 115.7, 110.9, 58.6, 42.3, 35.0, 33.5, 28.5, 26.4, 21.5, 20.3; HRMS (ESI-TOF)  $m/z$ :  $[\text{M} + \text{Na}]^+$  Calcd for  $\text{C}_{26}\text{H}_{29}\text{NO}_3\text{SNa}^+$  458.1760; Found 458.1767.

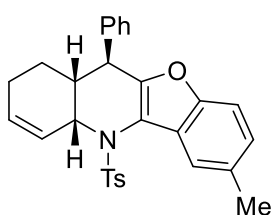

**Synthesis of 4h:** To an oven dried 10 mL Schlenk tube equipped with a stirring bar were added *N*-((*E*)-2-((*Z*)-benzylidene)-5-methylbenzofuran-3(2*H*)-ylidene)-4-methylbenzenesulfonamide **2h** (38.9 mg, 0.100 mmol, 1.0 equiv),  $\text{Pd}_2(\text{dba})_3$  (4.6 mg, 0.0050 mmol, 5 mol%) and **L7** (5.5 mg, 0.010 mmol, 10 mol%).

The tube was capped, evacuated and back-filled with argon for five times. Then

degassed dry toluene (1.0 mL) and 1,3-cyclohexadiene **1a** (19.0  $\mu$ L, 0.200 mmol, 2.0 equiv) were added via syringe sequentially under argon atmosphere. The mixture was stirred at 60  $^{\circ}$ C for 48 h. After complete consumption of **2h**, the mixture was directly purified by flash chromatography on silica gel (EtOAc/petroleum ether = 1/50) to afford product **4h**: 46.9 mg (0.0999 mmol), as a white solid, 99% yield; mp 193–195  $^{\circ}$ C;  $[\alpha]_D^{25} = +259.4$  ( $c = 0.34$  in  $\text{CHCl}_3$ ); >19:1 dr; 94% ee, determined by HPLC analysis (Daicel Chiralpak IG, *n*-Hexane/*i*-PrOH = 90/10, flow rate = 1.0 mL/min,  $\lambda = 254$  nm)  $t_R = 12.04$  min (major),  $t_R = 14.18$  min (minor);  $^1\text{H}$  NMR (400 MHz,  $\text{CDCl}_3$ )  $\delta$  (ppm) 7.97 (s, 1H), 7.59 (d,  $J = 8.3$  Hz, 2H), 7.27 (d,  $J = 8.0$  Hz, 2H), 7.22–7.04 (m, 5H), 6.60–6.43 (m, 2H), 5.78–5.66 (m, 1H), 5.62–5.50 (m, 1H), 5.08–4.98 (m, 1H), 3.80 (d,  $J = 9.9$  Hz, 1H), 2.49 (s, 3H), 2.44 (s, 3H), 2.30–2.16 (m, 1H), 2.15–1.98 (m, 1H), 1.80–1.74 (m, 1H), 1.71–1.58 (m, 2H);  $^{13}\text{C}$  NMR (100 MHz,  $\text{CDCl}_3$ )  $\delta$  (ppm) 152.7, 150.2, 144.0, 139.8, 134.8, 132.4, 129.89, 129.86, 128.34, 128.32, 128.2, 128.1, 127.2, 125.6, 124.7, 122.1, 116.7, 110.6, 58.3, 39.3, 36.6, 22.1, 21.6, 21.5, 20.6; HRMS (ESI-TOF)  $m/z$ :  $[\text{M} + \text{Na}]^+$  Calcd for  $\text{C}_{29}\text{H}_{27}\text{NO}_3\text{SNa}^+$  492.1604; Found 492.1604.

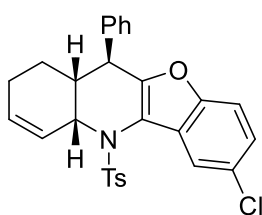

**Synthesis of 4i:** To an oven dried 10 mL Schlenk tube equipped with a stirring bar were added *N*-((*E*)-2-((*Z*)-benzylidene)-5-chlorobenzofuran-3(*2H*)-ylidene)-4-methylbenzenesulfonamide **2i** (41.0 mg, 0.100 mmol, 1.0 equiv),  $\text{Pd}_2(\text{dba})_3$  (4.6 mg, 0.0050 mmol, 5 mol%) and **L7** (5.5 mg, 0.010 mmol, 10 mol%). The

tube was capped, evacuated and back-filled with argon for five times. Then degassed dry toluene (1.0 mL) and 1,3-cyclohexadiene **1a** (19.0  $\mu$ L, 0.200 mmol, 2.0 equiv) were added via syringe sequentially under argon atmosphere. The mixture was stirred at 60  $^{\circ}$ C for 48 h. After complete consumption of **2i**, the mixture was directly purified by flash chromatography on silica gel (EtOAc/petroleum ether = 1/50) to afford product **4i**: 48.2 mg (0.0984 mmol), as a white solid, 98% yield; mp 188–190  $^{\circ}$ C;  $[\alpha]_D^{25} = +258.0$  ( $c = 0.35$  in  $\text{CHCl}_3$ ); >19:1 dr; 93% ee, determined by HPLC analysis (Daicel Chiralpak IG, *n*-Hexane/*i*-PrOH = 90/10, flow rate = 1.0 mL/min,  $\lambda = 254$  nm)  $t_R = 14.15$  min (minor),  $t_R = 17.53$  min (major);  $^1\text{H}$  NMR (400 MHz,  $\text{CDCl}_3$ )  $\delta$  (ppm) 8.18 (d,  $J = 2.0$  Hz, 1H), 7.59 (d,  $J = 8.0$  Hz, 2H), 7.29 (d,  $J = 8.0$  Hz, 2H), 7.25–7.18 (m, 3H), 7.17–7.10 (m, 2H), 6.55–6.45 (m, 2H), 5.80–5.70 (m, 1H), 5.60–5.48 (m, 1H), 5.08–4.97 (m, 1H), 3.80 (d,  $J = 9.9$  Hz, 1H), 2.45 (s, 3H), 2.30–2.17 (m, 1H), 2.15–2.04 (m, 1H), 1.82–1.74 (m, 1H), 1.73–1.59 (m, 2H);  $^{13}\text{C}$  NMR (100 MHz,  $\text{CDCl}_3$ )  $\delta$  (ppm) 152.6, 151.6, 144.3, 139.3, 134.6, 130.2, 130.0, 128.8, 128.4, 128.12, 128.07, 127.4, 126.0, 124.7, 122.1, 116.6, 112.1, 58.3, 39.3, 36.5, 22.0, 21.6, 20.5; HRMS (ESI-TOF)  $m/z$ :  $[\text{M} +$

Na]<sup>+</sup> Calcd for C<sub>28</sub>H<sub>24</sub><sup>35</sup>ClNO<sub>3</sub>SNa<sup>+</sup> 512.1058; Found 512.1060; Calcd for C<sub>28</sub>H<sub>24</sub><sup>37</sup>ClNO<sub>3</sub>SNa<sup>+</sup> 514.1029; Found 514.1038.

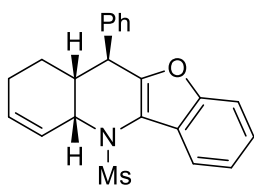

**Synthesis of 4j:** To an oven dried 10 mL Schlenk tube equipped with a stirring bar were added *N*-((*E*)-2-((*Z*)-benzylidene)benzofuran-3(*2H*)-ylidene)-4-methylbenzenesulfonamide **2j** (30.0 mg, 0.100 mmol, 1.0 equiv), Pd<sub>2</sub>(dba)<sub>3</sub> (4.6 mg, 0.0050 mmol, 5 mol%) and **L7** (5.5 mg, 0.010 mmol, 10 mol%). The

tube was capped, evacuated and back-filled with argon for five times. Then degassed dry toluene (1.0 mL) and 1,3-cyclohexadiene **1a** (19.0 μL, 0.200 mmol, 2.0 equiv) were added via syringe sequentially under argon atmosphere. The mixture was stirred at 60 °C for 48 h. After complete consumption of **2j**, the mixture was directly purified by flash chromatography on silica gel (EtOAc/petroleum ether = 1/50) to afford product **4j**: 33.6 mg (0.0885 mmol), as a white solid, 89% yield; mp 89–91 °C; [α]<sub>D</sub><sup>25</sup> = +10.9 (*c* = 0.55 in CHCl<sub>3</sub>); >19:1 dr; 97% ee, determined by HPLC analysis (Daicel Chiralpak IG, *n*-Hexane/*i*-PrOH = 90/10, flow rate = 1.0 mL/min, λ = 254 nm) t<sub>R</sub> = 18.26 min (major), t<sub>R</sub> = 42.92 min (minor); <sup>1</sup>H NMR (400 MHz, CDCl<sub>3</sub>) δ (ppm) 8.08–7.88 (m, 1H), 7.41–7.28 (m, 4H), 7.26–7.19 (m, 4H), 5.87–5.74 (m, 1H), 5.61–5.51 (m, 1H), 5.05–4.94 (m, 1H), 4.09 (d, *J* = 9.8 Hz, 1H), 3.10 (s, 3H), 2.58–2.49 (m, 1H), 2.43–2.29 (m, 1H), 2.25–2.13 (m, 1H), 1.97–1.80 (m, 2H); <sup>13</sup>C NMR (100 MHz, CDCl<sub>3</sub>) δ (ppm) 154.2, 149.1, 139.8, 130.3, 129.0, 128.2, 128.1, 127.6, 124.6, 124.2, 123.0, 122.0, 117.1, 111.2, 58.0, 39.6, 38.6, 38.4, 22.3, 20.6; HRMS (ESI-TOF) *m/z*: [M + Na]<sup>+</sup> Calcd for C<sub>22</sub>H<sub>21</sub>NO<sub>3</sub>SNa<sup>+</sup> 402.1134; Found 402.1142.

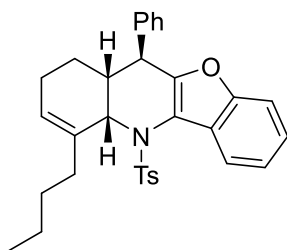

**Synthesis of 4k:** To an oven dried 10 mL Schlenk tube equipped with a stirring bar were added *N*-((*E*)-2-((*Z*)-benzylidene)benzofuran-3(*2H*)-ylidene)-4-methylbenzenesulfonamide **2a** (37.5 mg, 0.100 mmol, 1.0 equiv), 2-butylcyclohexa-1,3-diene **1b** (27.2 mg, 0.200 mmol, 2.0 equiv), Pd<sub>2</sub>(dba)<sub>3</sub> (4.6 mg, 0.0050 mmol, 5 mol%) and **L7** (5.5 mg, 0.010 mmol, 10 mol%).

Then distilled toluene (1.0 mL) was added via syringe. The tube was evacuated followed by back-filled with argon for five times. The mixture was stirred at 80 °C for 48 h. After complete consumption of **2a**, the mixture was directly purified by flash chromatography on silica gel (EtOAc/petroleum ether = 1/100) to afford product **4k**: 25.6 mg (0.0500 mmol), as a white solid, 50% yield; mp 237–239 °C; [α]<sub>D</sub><sup>25</sup> = +149.2 (*c* = 0.25 in CHCl<sub>3</sub>); >19:1 dr; 90% ee, determined by HPLC analysis (Daicel Chiralpak IG, *n*-Hexane/*i*-PrOH = 90/10, flow rate = 1.0 mL/min, λ = 254 nm) t<sub>R</sub> = 7.78 min

(major),  $t_R = 9.24$  min (minor);  $^1\text{H NMR}$   $\delta$  (ppm) 8.20 (d,  $J = 7.7$  Hz, 1H), 7.58 (d,  $J = 7.9$  Hz, 2H), 7.33–7.26 (m, 5H), 7.21–7.16 (m, 1H), 7.14–7.08 (m, 2H), 6.51–6.43 (m, 2H), 5.44 (s, 1H), 5.08 (s, 1H), 3.85 (d,  $J = 10.1$  Hz, 1H), 2.44 (s, 3H), 2.32–2.19 (m, 1H), 2.16–2.02 (m, 2H), 1.88–1.74 (m, 2H), 1.69–1.51 (m, 3H), 1.36–1.22 (m, 3H), 0.87 (t,  $J = 7.1$  Hz, 3H);  $^{13}\text{C NMR}$  (100 MHz,  $\text{CDCl}_3$ )  $\delta$  (ppm) 154.2, 149.1, 139.8, 130.3, 129.0, 128.2, 128.1, 127.6, 124.6, 124.2, 123.0, 122.0, 117.0, 111.2, 58.0, 39.6, 38.6, 38.4, 22.3, 20.6; HRMS (ESI-TOF)  $m/z$ :  $[\text{M} + \text{Na}]^+$  Calcd for  $\text{C}_{32}\text{H}_{33}\text{NO}_3\text{SNa}^+$  534.2073; Found 534.2075.

### 4.3 General procedure for asymmetric synthesis of diastereomers **5**

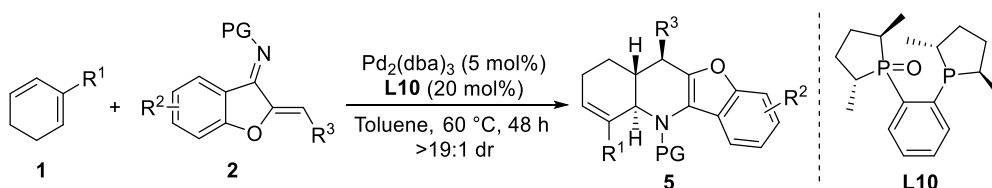

**General procedure:** To an oven dried 10 mL Schlenk tube equipped with a stirring bar were added 1-azadiene **2** (0.100 mmol, 1.0 equiv),  $\text{Pd}_2(\text{dba})_3$  (5 mol%) and **L10** (20 mol%). The tube was capped, evacuated and back-filled with argon for five times. Then degassed dry toluene (1.0 mL) and 1,3-cyclohexadiene **1** (0.200 mmol, 2.0 equiv) were added via syringe sequentially under argon atmosphere. The mixture was stirred at 60 °C for 48 h. After complete consumption of **2**, the mixture was directly purified by flash chromatography on silica gel (EtOAc/petroleum ether = 1/50) to afford product **5**.

*Note:* Racemic **5** was obtained by using  $\text{Pd}_2(\text{dba})_3$  in combination with racemic **L10**. The *dr* indicated the diastereomeric purity of the isolated products.

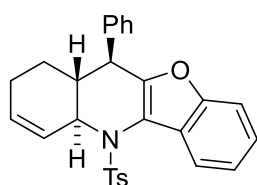

**Synthesis of 5a:** To an oven dried 10 mL Schlenk tube equipped with a stirring bar were added *N*-((*E*)-2-((*Z*)-benzylidene)benzofuran-3(2*H*)-ylidene)-4-methylbenzenesulfonamide **2a** (37.5 mg, 0.100 mmol, 1.0 equiv),  $\text{Pd}_2(\text{dba})_3$  (4.6 mg, 0.0050 mmol, 5 mol%) and **L10** (6.4 mg, 0.020 mmol, 20 mol%). The

tube was capped, evacuated and back-filled with argon for five times. Then degassed dry toluene (1.0 mL) and 1,3-cyclohexadiene **1a** (19.0  $\mu\text{L}$ , 0.200 mmol, 2.0 equiv) were added via syringe sequentially under argon atmosphere. The mixture was stirred at 60 °C for 48 h. After complete consumption of **2a**, the mixture was directly purified by flash chromatography on silica gel (EtOAc/petroleum ether



= /50) to afford product **5a**: 39.2 mg (0.0860 mmol), as a white solid, 86% yield; mp 174–176 °C;  $[\alpha]_D^{25} = +207.3$  ( $c = 0.28$  in  $\text{CHCl}_3$ ); >19:1 dr; 82% ee, determined by HPLC analysis (Daicel Chiralpak AD, *n*-Hexane/*i*-PrOH = 90/10, flow rate = 1.0 mL/min,  $\lambda = 254$  nm)  $t_R = 11.75$  min (major),  $t_R = 19.31$  min (minor);  $^1\text{H NMR}$  (400 MHz,  $\text{CDCl}_3$ )  $\delta$  (ppm) 8.12 (d,  $J = 7.5$ , 1H), 7.65 (d,  $J = 8.0$  Hz, 2H), 7.31–7.18 (m, 8H), 6.78–6.67 (m, 2H), 6.42 (dt,  $J = 10.6$ , 2.8 Hz, 1H), 5.99–5.95 (m, 1H), 4.28–4.11 (m, 1H), 3.53 (d,  $J = 10.2$  Hz, 1H), 2.42 (s, 3H), 2.03–1.94 (m, 1H), 1.90–1.72 (m, 1H), 1.68–1.53 (m, 2H), 1.30–1.21 (m, 1H);  $^{13}\text{C NMR}$  (100 MHz,  $\text{CDCl}_3$ )  $\delta$  (ppm) 153.9, 149.9, 144.0, 138.8, 135.8, 129.6, 129.1, 129.0, 128.5, 128.3, 127.4, 126.0, 125.2, 124.4, 123.0, 122.5, 122.0, 111.1, 64.5, 48.3, 38.9, 26.3, 24.3, 21.6; HRMS (ESI-TOF)  $m/z$ :  $[\text{M} + \text{Na}]^+$  Calcd for  $\text{C}_{28}\text{H}_{25}\text{NO}_3\text{SNa}^+$  478.1447; Found 478.1447.

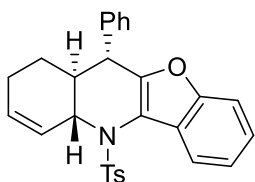

**Synthesis of *ent*-5a:** To an oven dried 10 mL Schlenk tube equipped with a stirring bar were added *N*-((*E*)-2-((*Z*)-benzylidene)benzofuran-3(*2H*)-ylidene)-4-methylbenzenesulfonamide **2a** (37.5 mg, 0.100 mmol, 1.0 equiv),  $\text{Pd}_2(\text{dba})_3$  (4.6 mg, 0.0050 mmol, 5 mol%) and *ent*-**L10** (6.4 mg, 0.020 mmol, 20 mol%).

The tube was capped, evacuated and back-filled with argon for five times. Then degassed dry toluene (1.0 mL) and 1,3-cyclohexadiene **1a** (19.0  $\mu\text{L}$ , 0.200 mmol, 2.0 equiv) were added via syringe sequentially under argon atmosphere. The mixture was stirred at 60 °C for 48 h. After complete consumption of **2a**, the mixture was directly purified by flash chromatography on silica gel (EtOAc/petroleum ether = 1/50) to afford product *ent*-**5a**: 41.0 mg (0.0878 mmol), as a white solid, 88% yield;  $[\alpha]_D^{25} = -219.7$  ( $c = 0.31$  in  $\text{CHCl}_3$ ); >19:1 dr; 83% ee, determined by HPLC analysis (Daicel Chiralpak AD, *n*-Hexane/*i*-PrOH = 90/10, flow rate = 1.0 mL/min,  $\lambda = 254$  nm)  $t_R = 11.78$  min (minor),  $t_R = 19.16$  min (major).

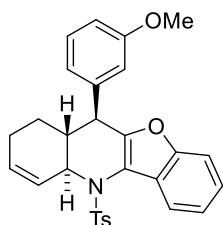

**Synthesis of 5b:** To an oven dried 10 mL Schlenk tube equipped with a stirring bar were add *N*-((*E*)-2-((*Z*)-3-methoxybenzylidene)benzofuran-3(*2H*)-ylidene)-4-methylbenzenesulfonamide **2b** (40.5 mg, 0.100 mmol, 1.0 equiv),  $\text{Pd}_2(\text{dba})_3$  (4.6 mg, 0.0050 mmol, 5 mol%) and **L10** (6.4 mg, 0.020 mmol, 20 mol%). The tube

was capped, evacuated and back-filled with argon for five times. Then degassed dry toluene (1.0 mL) and 1,3-cyclohexadiene **1a** (19.0  $\mu\text{L}$ , 0.200 mmol, 2.0 equiv) were added via syringe sequentially under argon atmosphere. The mixture was stirred at 60 °C for 48 h. After complete consumption of **2b**, the mixture was directly purified by flash chromatography on silica gel

(EtOAc/petroleum ether = 1/50) to afford product **5b**: 35.8 mg (0.0737 mmol), as a white solid, 74% yield; mp 198–200 °C;  $[\alpha]_{\text{D}}^{25} = +173.3$  ( $c = 0.27$  in  $\text{CHCl}_3$ ); >19:1 dr; 77% ee, determined by HPLC analysis (Daicel Chiralpak IG, *n*-Hexane/*i*-PrOH = 80/20, flow rate = 1.0 mL/min,  $\lambda = 254$  nm)  $t_{\text{R}} = 19.62$  min (minor),  $t_{\text{R}} = 21.05$  min (major);  $^1\text{H NMR}$  (400 MHz,  $\text{CDCl}_3$ )  $\delta$  (ppm) 8.11 (d,  $J = 7.8$  Hz, 1H), 7.64 (d,  $J = 8.1$  Hz, 2H), 7.34–7.26 (m, 4H), 7.18–7.07 (m, 1H), 6.80–6.74 (m, 1H), 6.46–6.38 (m, 1H), 6.36–6.28 (m, 2H), 6.02–5.93 (m, 1H), 4.24–4.12 (m, 1H), 3.78 (s, 3H), 3.50 (d,  $J = 10.3$  Hz, 1H), 2.40 (s, 3H), 2.05–1.92 (m, 1H), 1.85–1.74 (m, 1H), 1.69–1.62 (m, 1H), 1.60–1.51 (m, 2H), 1.26–1.23 (m, 1H);  $^{13}\text{C NMR}$  (100 MHz,  $\text{CDCl}_3$ )  $\delta$  (ppm) 159.6, 153.9, 149.8, 144.1, 140.3, 135.6, 129.8, 129.2, 129.0, 128.9, 126.0, 125.2, 124.4, 122.9, 122.6, 122.0, 120.9, 115.3, 111.5, 111.1, 64.4, 55.1, 48.3, 38.7, 26.4, 24.2, 21.6; HRMS (ESI-TOF)  $m/z$ :  $[\text{M} + \text{Na}]^+$  Calcd for  $\text{C}_{29}\text{H}_{27}\text{NO}_4\text{SNa}^+$  508.1553; Found 508.1555.

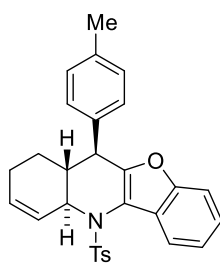

**Synthesis of 5c:** To an oven dried 10 mL Schlenk tube equipped with a stirring bar were added 4-methyl-*N*-((*E*)-2-((*Z*)-4-methylbenzylidene)benzofuran-3(*2H*)-ylidene)benzenesulfonamide **2c** (38.9 mg, 0.100 mmol, 1.0 equiv),  $\text{Pd}_2(\text{dba})_3$  (4.6 mg, 0.0050 mmol, 5 mol%) and **L10** (6.4 mg, 0.020 mmol, 20 mol%). The tube was capped, evacuated and back-filled with argon for five times. Then degassed

dry toluene (1.0 mL) and 1,3-cyclohexadiene **1a** (19.0  $\mu\text{L}$ , 0.200 mmol, 2.0 equiv) were added via syringe sequentially under argon atmosphere. The mixture was stirred at 60 °C for 48 h. After complete consumption of **2c**, the mixture was directly purified by flash chromatography on silica gel (EtOAc/petroleum ether = 1/50) to afford product **5c**: 41.1 mg (0.0875 mmol), as a white solid, 88% yield; mp 187–189 °C;  $[\alpha]_{\text{D}}^{25} = +193.1$  ( $c = 0.44$  in  $\text{CHCl}_3$ ); >19:1 dr; 82% ee, determined by HPLC analysis (Daicel Chiralpak IG, *n*-Hexane/*i*-PrOH = 90/10, flow rate = 1.0 mL/min,  $\lambda = 254$  nm)  $t_{\text{R}} = 13.20$  min (major),  $t_{\text{R}} = 21.41$  min (minor);  $^1\text{H NMR}$  (400 MHz,  $\text{CDCl}_3$ )  $\delta$  (ppm) 8.16–8.02 (m, 1H), 7.64 (d,  $J = 8.0$  Hz, 2H), 7.33–7.27 (m, 3H), 7.26–7.21 (m, 2H), 7.00 (d,  $J = 7.7$  Hz, 2H), 6.61 (d,  $J = 7.9$  Hz, 2H), 6.47–6.34 (m, 1H), 6.03–5.90 (m, 1H), 4.27–4.12 (m, 1H), 3.50 (d,  $J = 10.3$  Hz, 1H), 2.43 (s, 3H), 2.32 (s, 3H), 2.08–1.90 (m, 1H), 1.85–1.70 (m, 1H), 1.68–1.60 (m, 2H), 1.28–1.15 (m, 1H);  $^{13}\text{C NMR}$  (100 MHz,  $\text{CDCl}_3$ )  $\delta$  (ppm) 153.9, 150.1, 144.0, 137.1, 135.8, 135.7, 129.6, 129.11, 129.06, 129.0, 128.3, 126.1, 125.2, 124.3, 122.9, 122.5, 121.9, 111.2, 64.5, 48.0, 38.9, 26.3, 24.3, 21.6, 21.1; HRMS (ESI-TOF)  $m/z$ :  $[\text{M} + \text{Na}]^+$  Calcd for  $\text{C}_{29}\text{H}_{27}\text{NO}_3\text{SNa}^+$  492.1604; Found 492.1606.

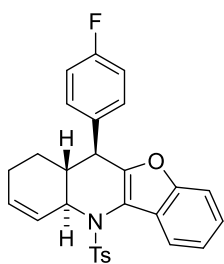

**Synthesis of 5d:** To an oven dried 10 mL Schlenk tube equipped with a stirring bar were added *N*-((*E*)-2-((*Z*)-4-fluorobenzylidene)benzofuran-3(*2H*)-ylidene)-4-methylbenzenesulfonamide **2d** (39.3 mg, 0.100 mmol, 1.0 equiv), Pd<sub>2</sub>(dba)<sub>3</sub> (4.6 mg, 0.0050 mmol, 5 mol%) and **L10** (6.4 mg, 0.020 mmol, 20 mol%). The tube was capped, evacuated and back-filled with argon for five times. Then

degassed dry toluene (1.0 mL) and 1,3-cyclohexadiene **1a** (19.0 μL, 0.200 mmol, 2.0 equiv) were added via syringe sequentially under argon atmosphere. The mixture was stirred at 60 °C for 48 h. After complete consumption of **2d**, the mixture was directly purified by flash chromatography on silica gel (EtOAc/DCM/petroleum ether = 1/1/50) to afford product **5d**: 39.3 mg (0.0830 mmol), as a white solid, 83% yield; mp 121–123 °C; [α]<sub>D</sub><sup>25</sup> = +165.2 (*c* = 0.62 in CHCl<sub>3</sub>); >19:1 dr; 79% ee, determined by HPLC analysis (Daicel Chiralpak AD, *n*-Hexane/*i*-PrOH = 90/10, flow rate = 1.0 mL/min, λ = 254 nm) t<sub>R</sub> = 13.47 min (major), t<sub>R</sub> = 19.21 min (minor); <sup>1</sup>H NMR (400 MHz, CDCl<sub>3</sub>) δ (ppm) 8.11 (d, *J* = 7.8 Hz, 1H), 7.65 (d, *J* = 8.0 Hz, 2H), 7.35–7.27 (m, 4H), 6.96–6.78 (m, 2H), 6.75–6.54 (m, 2H), 6.40 (d, *J* = 10.5 Hz, 1H), 6.06–5.88 (m, 1H), 4.24–4.13 (m, 1H), 3.53 (d, *J* = 10.3 Hz, 1H), 2.43 (s, 3H), 2.07–1.92 (m, 1H), 1.87–1.72 (m, 1H), 1.67–1.59 (m, 2H), 1.27–1.20 (m, 1H); <sup>13</sup>C NMR (100 MHz, CDCl<sub>3</sub>) δ (ppm) 162.1 (d, <sup>1</sup>J<sub>FC</sub> = 247.0 Hz), 153.9, 149.6, 144.1, 135.8, 134.5, 129.9, 129.8, 129.9 (d, <sup>3</sup>J<sub>FC</sub> = 8.0 Hz), 129.1, 129.0, 126.0, 125.1, 124.6, 123.1, 122.6, 122.1, 115.3 (d, <sup>2</sup>J<sub>FC</sub> = 21.3 Hz), 111.1, 64.5, 47.5, 39.1, 26.3, 24.3, 21.6; <sup>19</sup>F NMR (375 MHz, CDCl<sub>3</sub>) δ (ppm) –115.0; HRMS (ESI-TOF) *m/z*: [M + Na]<sup>+</sup> Calcd for C<sub>28</sub>H<sub>24</sub>FNO<sub>3</sub>SN<sup>+</sup> 496.1353; Found 496.1354. Recrystallisation of the above product from petroleum ether (7.0 mL) and EtOAc (1.0 mL) gave a white solid, 20.0 mg (0.0422 mmol), 42% yield, 91% ee.

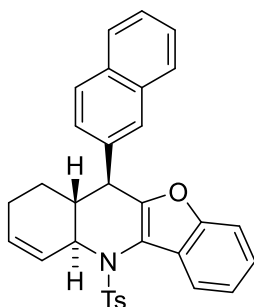

**Synthesis of 5e:** To an oven dried 10 mL Schlenk tube equipped with a stirring bar were added 4-methyl-*N*-((*Z,Z*,3*E*)-2-(naphthalen-2-ylmethylene)-benzofuran-3(*2H*)-ylidene)benzenesulfonamide **2e** (42.6 mg, 0.100 mmol, 1.0 equiv), Pd<sub>2</sub>(dba)<sub>3</sub> (4.6 mg, 0.0050 mmol, 5 mol%) and **L10** (6.4 mg, 0.020 mmol, 20 mol%). The tube was capped, evacuated and back-filled with argon for five times. Then degassed dry toluene (1.0 mL) and 1,3-cyclohexadiene **1a** (19.0

μL, 0.200 mmol, 2.0 equiv) were added via syringe sequentially under argon atmosphere. The mixture was stirred at 60 °C for 48 h. After complete consumption of **2e**, the mixture was directly purified by flash chromatography on silica gel (EtOAc/DCM/petroleum ether = 1/25/50) to afford product **5e**:

42.9 mg (0.0848 mmol), as a white solid, 85% yield; mp 198–200 °C;  $[\alpha]_{\text{D}}^{25} = +371.1$  ( $c = 0.24$  in  $\text{CHCl}_3$ ); >19:1 dr; 88% ee, determined by HPLC analysis (Daicel Chiralpak IG, *n*-Hexane/*i*-PrOH = 80/20, flow rate = 1.0 mL/min,  $\lambda = 254$  nm)  $t_{\text{R}} = 18.82$  min (major),  $t_{\text{R}} = 20.63$  min (minor);  $^1\text{H}$  NMR (400 MHz,  $\text{CDCl}_3$ )  $\delta$  (ppm) 8.15 (d,  $J = 7.8$  Hz, 1H), 7.82–7.77 (m, 1H), 7.75–7.67 (m, 3H), 7.63 (d,  $J = 8.5$  Hz, 1H), 7.50–7.43 (m, 2H), 7.38 (s, 1H), 7.33–7.25 (m, 5H), 6.70 (dd,  $J = 8.4, 1.8$  Hz, 1H), 6.45 (dt,  $J = 10.4, 2.7$  Hz, 1H), 6.05–5.91 (m, 1H), 4.31–4.20 (m, 1H), 3.70 (d,  $J = 10.2$  Hz, 1H), 2.43 (s, 3H), 2.03–1.92 (m, 1H), 1.80–1.63 (m, 3H), 1.37–1.23 (m, 1H);  $^{13}\text{C}$  NMR (100 MHz,  $\text{CDCl}_3$ )  $\delta$  (ppm) 154.0, 149.8, 144.1, 136.2, 135.8, 133.2, 132.7, 129.7, 129.1, 128.0, 127.7, 127.6, 127.5, 126.2, 126.0, 125.9, 125.2, 124.5, 123.0, 122.6, 122.2, 111.1, 64.4, 48.5, 38.8, 26.3, 24.2, 21.7; HRMS (ESI-TOF)  $m/z$ :  $[\text{M} + \text{Na}]^+$  Calcd for  $\text{C}_{32}\text{H}_{27}\text{NO}_3\text{SNa}^+$  528.1604; Found 528.1605.

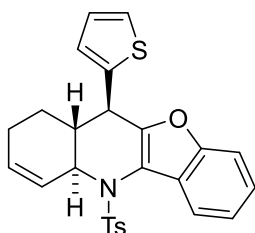

**Synthesis of 5f:** To an oven dried 10 mL Schlenk tube equipped with a stirring bar were added 4-methyl-*N*-((2*Z*,3*E*)-2-(thiophen-2-ylmethylene)benzofuran-3(2*H*)-ylidene)benzenesulfonamide **2f** (38.1 mg, 0.100 mmol, 1.0 equiv),  $\text{Pd}_2(\text{dba})_3$  (4.6 mg, 0.0050 mmol, 5 mol%) and **L10** (6.6 mg, 0.01 mmol, 10 mol%). The tube was capped, evacuated and back-filled with argon for five

times. Then degassed dry toluene (1.0 mL) and 1,3-cyclohexadiene **1a** (19.0  $\mu\text{L}$ , 0.200 mmol, 2.0 equiv) were added via syringe sequentially under argon atmosphere. The mixture was stirred at 60 °C for 48 h. After complete consumption of **2f**, the mixture was directly purified by flash chromatography on silica gel (EtOAc/petroleum ether = 1/50) to afford product **5f**: 39.8 mg (0.0862 mmol), as a white solid, 86% yield; mp 106–108 °C;  $[\alpha]_{\text{D}}^{25} = +161.3$  ( $c = 0.48$  in  $\text{CHCl}_3$ ); >19:1 dr; 83% ee, determined by HPLC analysis (Daicel Chiralpak AD, *n*-Hexane/*i*-PrOH = 80/20, flow rate = 1.0 mL/min,  $\lambda = 254$  nm)  $t_{\text{R}} = 8.56$  min (major),  $t_{\text{R}} = 10.07$  min (minor);  $^1\text{H}$  NMR (400 MHz,  $\text{CDCl}_3$ )  $\delta$  (ppm) 8.11 (d,  $J = 7.5$  Hz, 1H), 7.61 (d,  $J = 8.0$  Hz, 2H), 7.39–7.13 (m, 6H), 6.96–6.83 (m, 1H), 6.71–6.58 (m, 1H), 6.43 (d,  $J = 10.6$  Hz, 1H), 6.09–5.85 (m, 1H), 4.23–4.03 (m, 1H), 3.88 (d,  $J = 10.5$  Hz, 1H), 2.40 (s, 3H), 2.07–1.93 (m, 1H), 1.84–1.68 (m, 2H), 1.55–1.42 (m, 1H), 1.30–1.15 (m, 1H);  $^{13}\text{C}$  NMR (100 MHz,  $\text{CDCl}_3$ )  $\delta$  (ppm) 153.9, 148.7, 144.0, 141.3, 135.6, 129.8, 129.3, 128.9, 126.6, 126.4, 125.7, 125.2, 124.6, 124.5, 123.0, 122.7, 121.6, 111.2, 64.2, 43.1, 39.1, 26.7, 24.3, 21.6; HRMS (ESI-TOF)  $m/z$ :  $[\text{M} + \text{Na}]^+$  Calcd for  $\text{C}_{26}\text{H}_{23}\text{NO}_3\text{S}_2\text{Na}^+$  484.1012; Found 484.1012.

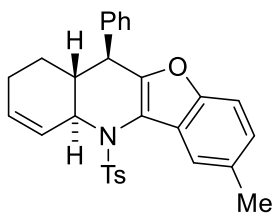

**Synthesis of 5g:** To an oven dried 10 mL Schlenk tube equipped with a stirring bar were added *N*-((*E*)-2-((*Z*)-benzylidene)-5-methylbenzofuran-3(*2H*)-ylidene)-4-methylbenzenesulfonamide **2h** (38.9 mg, 0.100 mmol, 1.0 equiv), Pd<sub>2</sub>(dba)<sub>3</sub> (4.6 mg, 0.0050 mmol, 5 mol%) and **L10** (6.4 mg, 0.020 mmol, 20 mol%). The tube was capped, evacuated and back-filled with argon

for five times. Then degassed dry toluene (1.0 mL) and 1,3-cyclohexadiene **1a** (19.0  $\mu$ L, 0.200 mmol, 2.0 equiv) were added via syringe sequentially under argon atmosphere. The mixture was stirred at 60  $^{\circ}$ C for 48 h. After complete consumption of **2h**, the mixture was directly purified by flash chromatography on silica gel (EtOAc/petroleum ether = 1/50) to afford product **5g**: 40.9 mg (0.0871 mmol), as a white solid, 87% yield; mp 112–114  $^{\circ}$ C;  $[\alpha]_{\text{D}}^{25} = +242.6$  ( $c = 0.39$  in CHCl<sub>3</sub>); >19:1 dr; 85% ee, determined by HPLC analysis (Daicel Chiralpak IG, *n*-Hexane/*i*-PrOH = 80/20, flow rate = 1.0 mL/min,  $\lambda = 254$  nm)  $t_{\text{R}} = 12.51$  min (minor),  $t_{\text{R}} = 17.10$  min (major); <sup>1</sup>H NMR (400 MHz, CDCl<sub>3</sub>)  $\delta$  (ppm) 7.90 (s, 1H), 7.69–7.63 (m, 2H), 7.29–7.26 (m, 1H), 7.25–7.24 (m, 1H), 7.24–7.13 (m, 4H), 7.06 (dd,  $J = 8.5, 1.8$  Hz, 1H), 6.75–6.68 (m, 2H), 6.42 (dt,  $J = 10.6, 2.6$  Hz, 1H), 6.01–5.92 (m, 1H), 4.22–4.13 (m, 1H), 3.51 (d,  $J = 10.2$  Hz, 1H), 2.48 (s, 3H), 2.42 (s, 3H), 2.04–1.92 (m, 1H), 1.85–1.72 (m, 1H), 1.67–1.56 (m, 2H), 1.27–1.22 (m, 1H); <sup>13</sup>C NMR (100 MHz, CDCl<sub>3</sub>)  $\delta$  (ppm) 152.4, 150.1, 144.0, 138.9, 135.8, 132.5, 129.6, 129.1, 128.9, 128.5, 128.3, 127.4, 126.1, 125.7, 125.2, 122.2, 121.8, 110.7, 64.5, 48.4, 38.9, 26.3, 24.3, 21.6, 21.5; HRMS (ESI-TOF)  $m/z$ : [M + Na]<sup>+</sup> Calcd for C<sub>29</sub>H<sub>27</sub>NO<sub>3</sub>SNa<sup>+</sup> 492.1604; Found 492.1601. Recrystallisation of the above product from petroleum ether (7.0 mL) and EtOAc (1.0 mL) gave a white solid, 20.2 mg (0.0422 mmol), 42% yield, 97% ee.

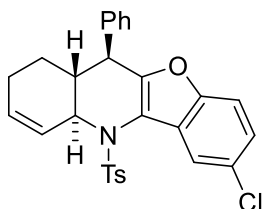

**Synthesis of 5h:** To an oven dried 10 mL Schlenk tube equipped with a stirring bar were added *N*-((*E*)-2-((*Z*)-benzylidene)-5-chlorobenzofuran-3(*2H*)-ylidene)-4-methylbenzenesulfonamide **2i** (41.0 mg, 0.100 mmol, 1.0 equiv), Pd<sub>2</sub>(dba)<sub>3</sub> (4.6 mg, 0.0050 mmol, 5 mol%) and **L10** (6.4 mg, 0.020 mmol, 20 mol%). The tube was capped, evacuated and back-filled with argon for five

times. Then degassed dry toluene (1.0 mL) and 1,3-cyclohexadiene **1a** (19.0  $\mu$ L, 0.200 mmol, 2.0 equiv) were added via syringe sequentially under argon atmosphere. The mixture was stirred at 60  $^{\circ}$ C for 48 h. After complete consumption of **2i**, the mixture was directly purified by flash chromatography on silica gel (EtOAc/petroleum ether = 1/50) to afford product **5h**: 41.7 mg (0.0851 mmol), as a white

solid, 85% yield; mp 108–110 °C;  $[\alpha]_D^{25} = +226.9$  ( $c = 0.48$  in  $\text{CHCl}_3$ ); >19:1 dr; 87% ee, determined by HPLC analysis (Daicel Chiralpak IA, *n*-Hexane/*i*-PrOH = 60/40, flow rate = 1.0 mL/min,  $\lambda = 254$  nm)  $t_R = 5.49$  min (minor),  $t_R = 7.18$  min (major);  $^1\text{H NMR}$  (400 MHz,  $\text{CDCl}_3$ )  $\delta$  (ppm) 8.12–8.07 (m, 1H), 7.68–7.62 (m, 2H), 7.31–7.26 (m, 2H), 7.25–7.16 (m, 5H), 6.75–6.67 (m, 2H), 6.40 (dt,  $J = 10.7, 2.7$  Hz, 1H), 6.02–5.90 (m, 1H), 4.23–4.14 (m, 1H), 3.52 (d,  $J = 9.9$  Hz, 1H), 2.45 (s, 3H), 2.09–1.93 (m, 1H), 1.89–1.74 (m, 1H), 1.70–1.57 (m, 2H), 1.28–1.22 (m, 1H);  $^{13}\text{C NMR}$  (100 MHz,  $\text{CDCl}_3$ )  $\delta$  (ppm) 152.3, 151.4, 144.2, 138.4, 135.6, 129.7, 129.2, 129.1, 128.8, 128.42, 128.39, 127.5, 126.5, 125.8, 124.7, 122.3, 121.6, 112.1, 64.5, 48.3, 38.9, 26.3, 24.2, 21.6; HRMS (ESI-TOF)  $m/z$ :  $[\text{M} + \text{Na}]^+$  Calcd for  $\text{C}_{28}\text{H}_{24}^{35}\text{ClNO}_3\text{SNa}^+$  512.1058; Found 512.1061; Calcd for  $\text{C}_{28}\text{H}_{24}^{37}\text{ClNO}_3\text{SNa}^+$  514.1028; Found 514.1041. Recrystallisation of the above product from petroleum ether (7.0 mL) and EtOAc (1.0 mL) gave a white solid, 27.2 mg (0.0555 mmol), 56% yield, 98% ee.

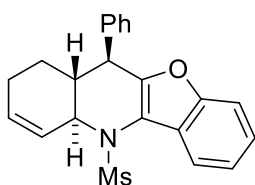

**Synthesis of 5i:** To an oven dried 10 mL Schlenk tube equipped with a stirring bar were add *N*-((*E*)-2-((*Z*)-benzylidene)benzofuran-3(*2H*)-ylidene)-4-methyl benzenesulfonamide **2j** (30.0 mg, 0.100 mmol, 1.0 equiv),  $\text{Pd}_2(\text{dba})_3$  (4.6 mg, 0.0050 mmol, 5 mol%) and **L10** (6.4 mg, 0.020 mmol, 20 mol%). The tube was

capped, evacuated and back-filled with argon for five times. Then degassed dry toluene (1.0 mL) and 1,3-cyclohexadiene **1a** (19.0  $\mu\text{L}$ , 0.200 mmol, 2.0 equiv) were added via syringe sequentially under argon atmosphere. The mixture was stirred at 60 °C for 48 h. After complete consumption of **2j**, the mixture was directly purified by flash chromatography on silica gel (EtOAc/petroleum ether = 1/50) to afford product **5i**: 30.6 mg (0.0806 mmol), as a white solid, 81% yield; mp 166–168 °C;  $[\alpha]_D^{25} = +24.5$  ( $c = 0.22$  in  $\text{CHCl}_3$ ); >19:1 dr; 70% ee, determined by HPLC analysis (Daicel Chiralpak IG, *n*-Hexane/*i*-PrOH = 90/10, flow rate = 1.0 mL/min,  $\lambda = 254$  nm)  $t_R = 20.91$  min (major),  $t_R = 42.24$  min (minor);  $^1\text{H NMR}$  (400 MHz,  $\text{CDCl}_3$ )  $\delta$  (ppm) 7.75 (dd,  $J = 6.8, 2.2$  Hz, 1H), 7.34–7.25 (m, 3H), 7.21–7.13 (m, 5H), 6.21 (dd,  $J = 10.0, 2.2$  Hz, 1H), 5.95 (dt,  $J = 11.0, 3.0$  Hz, 1H), 4.23–4.13 (m, 1H), 3.71 (d,  $J = 10.1$  Hz, 1H), 3.09 (s, 3H), 2.44–2.31 (m, 1H), 2.10–1.97 (m, 2H), 1.96–1.89 (m, 1H), 1.46–1.35 (m, 1H);  $^{13}\text{C NMR}$  (100 MHz,  $\text{CDCl}_3$ )  $\delta$  (ppm) 153.8, 149.1, 139.2, 130.6, 128.9, 128.5, 127.7, 124.9, 124.8, 124.5, 122.9, 122.1, 121.5, 111.3, 63.7, 48.2, 42.4, 41.6, 26.3, 24.6; HRMS (ESI-TOF)  $m/z$ :  $[\text{M} + \text{Na}]^+$  Calcd for  $\text{C}_{22}\text{H}_{21}\text{NO}_3\text{SNa}^+$  402.1134; Found 402.1136.

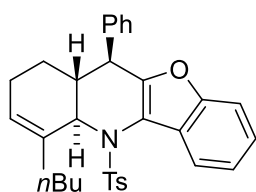

**Synthesis of 5j:** To an oven dried 10 mL Schlenk tube equipped with a stirring bar were added *N*-((*E*)-2-((*Z*)-benzylidene)benzofuran-3(*2H*)-ylidene)-4-methylbenzenesulfonamide **2a** (37.5 mg, 0.100 mmol, 1.0 equiv), Pd<sub>2</sub>(dba)<sub>3</sub> (4.6 mg, 0.0050 mmol, 5 mol%) and **L10** (6.4 mg, 0.020 mmol, 20 mol%).

Then degassed dry toluene (1.0 mL) and 2-butylcyclohexa-1,3-diene **1b** (27.2 mg, 0.200 mmol, 2.0 equiv) were added via syringe sequentially under argon atmosphere. The mixture was stirred at 80 °C for 48 h. After complete consumption of **2a**, the mixture was directly purified by flash chromatography on silica gel (EtOAc/petroleum ether = 1/100) to afford product **5j**: 10.3 mg (0.0201 mmol), as a white solid, 20% yield, as a white solid; mp 181–183 °C; [α]<sub>D</sub><sup>25</sup> = +62.9 (*c* = 0.39 in CHCl<sub>3</sub>); >19:1 dr; 53% ee, determined by HPLC analysis (Daicel Chiralpak IG, *n*-Hexane/*i*-PrOH = 90/10, flow rate = 1.0 mL/min, λ = 256 nm) t<sub>R</sub> = 9.90 min (major), t<sub>R</sub> = 11.98 min (minor); <sup>1</sup>H NMR (400 MHz, CDCl<sub>3</sub>) δ (ppm) 8.12 (d, *J* = 7.5 Hz, 1H), 7.51 (d, *J* = 8.2 Hz, 2H), 7.37–7.27 (m, 3H), 7.25–7.17 (m, 3H), 7.15–7.07 (m, 2H), 6.42 (dd, *J* = 7.1, 1.7 Hz, 2H), 5.86–5.78 (m, 1H), 4.20–4.09 (m, 1H), 3.60 (d, *J* = 10.6 Hz, 1H), 2.71–2.59 (m, 1H), 2.51–2.44 (m, 1H), 2.44 (s, 3H), 2.12–1.91 (m, 3H), 1.57–1.46 (m, 2H), 1.43–1.33 (m, 3H), 1.20–1.08 (m, 1H), 0.92 (t, *J* = 7.2 Hz, 3H); <sup>13</sup>C NMR (100 MHz, CDCl<sub>3</sub>) δ (ppm) 153.9, 150.8, 143.9, 139.0, 137.7, 136.2, 129.6, 129.3, 128.3, 128.2, 127.3, 125.6, 124.8, 124.4, 123.1, 123.0, 122.1, 111.3, 68.8, 49.6, 39.8, 34.1, 31.3, 26.9, 24.7, 22.6, 21.6, 14.1; HRMS (ESI-TOF) *m/z*: [M + Na]<sup>+</sup> Calcd for C<sub>32</sub>H<sub>33</sub>NO<sub>3</sub>SNa<sup>+</sup> 534.2073; Found 534.2074.

## 5. More substrate exploration

### 5.1 Exploration of more cyclic dienes and polyenes

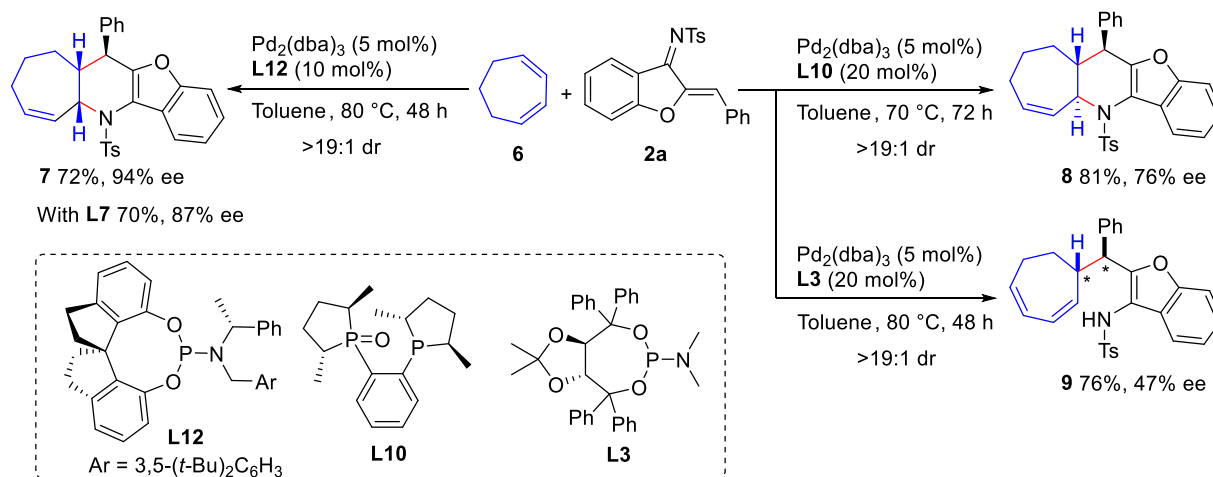

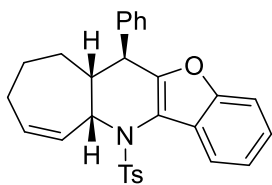

**Synthesis of 7:** To an oven dried 10 mL Schlenk tube equipped with a stirring bar were added *N*-((*E*)-2-((*Z*)-benzylidene)benzofuran-3(*2H*)-ylidene)-4-methylbenzenesulfonamide **2a** (37.5 mg, 0.100 mmol, 1.0 equiv), Pd<sub>2</sub>(dba)<sub>3</sub> (4.6 mg, 0.0050 mmol, 5 mol%) and **L12** (6.0 mg, 0.010 mmol, 10 mol%).

The tube was capped, evacuated and back-filled with argon for five times. Then degassed dry toluene (1.0 mL) and 1,3-cycloheptadiene **6** (22.0 μL, 0.200 mmol, 2.0 equiv) were added via syringe sequentially under argon atmosphere. The mixture was stirred at 60 °C for 48 h. After complete consumption of **2a**, the mixture was directly purified by flash chromatography on silica gel (EtOAc/petroleum ether = 1/50) to afford product **7**: 34.0 mg (0.0724 mmol), as a white solid, 72% yield; mp 181–183 °C; [α]<sub>D</sub><sup>25</sup> = +20.0 (*c* = 0.41 in CHCl<sub>3</sub>); >19:1 dr; 94% ee, determined by HPLC analysis (Daicel Chiralpak IG, *n*-Hexane/*i*-PrOH = 90/10, flow rate = 1.0 mL/min, λ = 254 nm) t<sub>R</sub> = 7.38 min (major), t<sub>R</sub> = 10.04 min (minor); <sup>1</sup>H NMR (400 MHz, CDCl<sub>3</sub>) δ (ppm) 8.25–8.19 (m, 1H), 7.68–7.56 (m, 2H), 7.30–7.26 (m, 4H), 7.20–7.16 (m, 1H), 7.15–7.09 (m, 2H), 6.56–6.50 (m, 2H), 5.90–5.77 (m, 1H), 5.42–5.38 (m, 1H), 5.18–5.16 (m, 1H), 3.95 (d, *J* = 11.4 Hz, 1H), 2.43 (s, 3H), 2.31–2.18 (m, 1H), 2.09 (d, *J* = 18.6 Hz, 1H), 1.80–1.64 (m, 1H), 1.53–1.42 (m, 4H); <sup>13</sup>C NMR (100 MHz, CDCl<sub>3</sub>) δ (ppm) 154.3, 150.0, 144.1, 143.3, 138.9, 135.1, 132.6, 132.3, 130.5, 129.8, 129.6, 129.0, 128.4, 128.3, 128.3, 128.2, 127.9, 127.2, 125.4, 124.6, 124.5, 123.0, 122.4, 117.9, 111.2, 62.7, 40.6, 39.7, 29.4, 28.8, 21.5, 21.0; HRMS (ESI-TOF) *m/z*: [M + Na]<sup>+</sup> Calcd for C<sub>29</sub>H<sub>27</sub>NO<sub>3</sub>SN<sup>+</sup> 492.1604; Found 492.1613.

*Note: 7 was obtained in 70 yield and 87% ee by using Pd<sub>2</sub>(dba)<sub>3</sub> in combination with L7, and the configuration of 7 was assigned by analogy with products 4.*

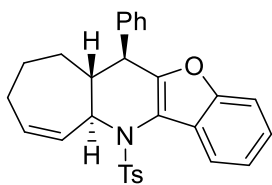

**Synthesis of 8:** To an oven dried 10 mL Schlenk tube equipped with a stirring bar were added *N*-((*E*)-2-((*Z*)-benzylidene)benzofuran-3(*2H*)-ylidene)-4-methylbenzenesulfonamide **2a** (37.5 mg, 0.100 mmol, 1.0 equiv), Pd<sub>2</sub>(dba)<sub>3</sub> (4.6 mg, 0.0050 mmol, 5 mol%) and **L10** (6.4 mg, 0.020 mmol, 20 mol%).

The tube was capped, evacuated and back-filled with argon for five times. Then degassed dry toluene (1.0 mL) and 1,3-cycloheptadiene **6** (22.0 μL, 0.200 mmol, 2.0 equiv) were added via syringe sequentially under argon atmosphere. The mixture was stirred at 70 °C for 72 h. After complete consumption of **2a**, the mixture was directly purified by flash chromatography on silica gel (EtOAc/petroleum ether = 1/50) to afford product **8**: 37.8 mg (0.0805 mmol), as a white solid, 81%



yield; mp 199–201 °C;  $[\alpha]_{\text{D}}^{25} = -16.5$  ( $c = 0.55$  in  $\text{CHCl}_3$ ); >19:1 dr; 76% ee, determined by HPLC analysis (Daicel Chiralpak IG, *n*-Hexane/*i*-PrOH = 90/10, flow rate = 1.0 mL/min,  $\lambda = 254$  nm)  $t_{\text{R}} = 11.72$  min (major),  $t_{\text{R}} = 14.73$  min (minor);  $^1\text{H NMR}$  (400 MHz,  $\text{CDCl}_3$ )  $\delta$  (ppm) 8.03–7.95 (m, 1H), 7.54–7.48 (m, 2H), 7.37–7.27 (m, 7H), 7.26–7.21 (m, 1H), 6.94–6.83 (m, 2H), 6.09 (ddd,  $J = 11.3$ , 4.0, 1.5 Hz, 1H), 5.86–5.76 (m, 1H), 4.58–4.47 (m, 1H), 2.48 (s, 3H), 2.39 (d,  $J = 11.0$  Hz, 1H), 2.23–2.10 (m, 2H), 2.09–1.99 (m, 1H), 1.71–1.59 (m, 1H), 1.54–1.46 (m, 1H), 1.27–1.20 (m, 1H), 1.16–1.07 (m, 1H);  $^{13}\text{C NMR}$  (100 MHz,  $\text{CDCl}_3$ )  $\delta$  (ppm) 153.8, 152.1, 144.1, 136.4, 133.7, 130.1, 129.5, 129.1, 128.6, 127.9, 127.6, 125.4, 123.9, 123.2, 121.2, 117.6, 111.4, 63.1, 50.7, 45.9, 33.3, 27.4, 25.0, 21.6; HRMS (ESI-TOF)  $m/z$ :  $[\text{M} + \text{Na}]^+$  Calcd for  $\text{C}_{29}\text{H}_{27}\text{NO}_3\text{SNa}^+$  492.1604; Found 492.1604. *The configuration of 8 was assigned by analogy with products 5.*

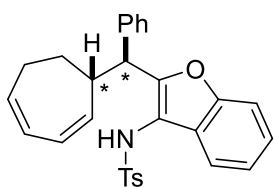

**Synthesis of 9:** To an oven dried 10 mL Schlenk tube equipped with a stirring bar were added *N*-((*E*)-2-((*Z*)-benzylidene)benzofuran-3(*2H*)-ylidene)-4-methylbenzenesulfonamide **2a** (37.5 mg, 0.100 mmol, 1.0 equiv),  $\text{Pd}_2(\text{dba})_3$  (4.6 mg, 0.0050 mmol, 5 mol%) and **L3** (10.8 mg, 0.0200 mmol, 20 mol%).

The tube was capped, evacuated and back-filled with argon for five times. Then degassed dry toluene (1.0 mL) and 1,3-cycloheptadiene **6** (22.0  $\mu\text{L}$ , 0.200 mmol, 2.0 equiv) were added via syringe sequentially under argon atmosphere. The mixture was stirred at 80 °C for 36 h. After complete consumption of **2a**, the mixture was directly purified by flash chromatography on silica gel (EtOAc/petroleum ether = 1/50) to afford product **9**: 34.0 mg (0.0725 mmol), as a colorless oil, 73% yield;  $[\alpha]_{\text{D}}^{25} = -74.0$  ( $c = 0.34$  in  $\text{CHCl}_3$ ); >19:1 dr; 47% ee, determined by HPLC analysis (Daicel Chiralpak IE, *n*-Hexane/*i*-PrOH = 95/5, flow rate = 1.0 mL/min,  $\lambda = 254$  nm)  $t_{\text{R}} = 8.87$  min (minor),  $t_{\text{R}} = 10.0$  min (major);  $^1\text{H NMR}$  (400 MHz,  $\text{CDCl}_3$ )  $\delta$  (ppm) 7.65 (d,  $J = 8.1$  Hz, 2H), 7.38 (d,  $J = 8.3$  Hz, 1H), 7.25–7.17 (m, 7H), 7.16–7.08 (m, 3H), 6.11–6.01 (m, 1H), 5.93–5.82 (m, 2H), 5.69 (dd,  $J = 11.6$ , 6.5 Hz, 1H), 5.45 (dd,  $J = 11.6$ , 5.3 Hz, 1H), 3.88 (d,  $J = 11.4$  Hz, 1H), 3.33–3.27 (m, 1H), 2.41 (s, 3H), 2.23–2.14 (m, 2H), 1.68–1.62 (m, 1H), 1.55–1.45 (m, 1H);  $^{13}\text{C NMR}$  (100 MHz,  $\text{CDCl}_3$ )  $\delta$  (ppm) 156.0, 153.3, 143.9, 138.7, 136.8, 135.1, 134.9, 129.7, 128.6, 128.5, 127.6, 127.0, 126.0, 125.1, 124.5, 124.2, 123.0, 119.4, 113.1, 111.4, 45.9, 43.7, 29.0, 28.2, 21.6; HRMS (ESI-TOF)  $m/z$ :  $[\text{M} + \text{Na}]^+$  Calcd for  $\text{C}_{29}\text{H}_{27}\text{NO}_3\text{SNa}^+$  492.1604; Found 492.1612.

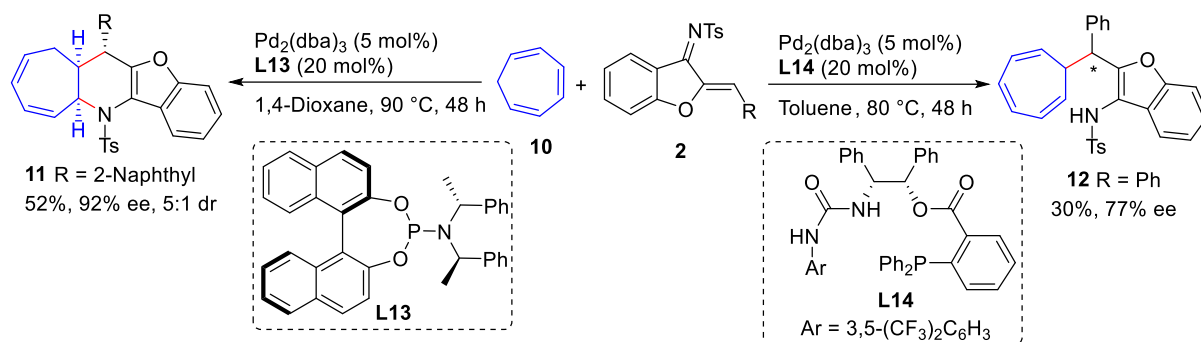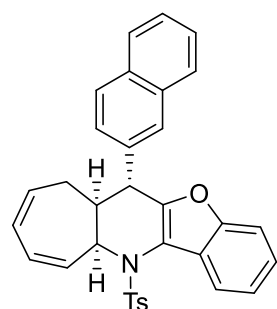

**Synthesis of 11:** To an oven dried 10 mL Schlenk tube equipped with a stirring bar were added 4-methyl-*N*-((*2Z,3E*)-2-(naphthalen-2-ylmethylene)-benzofuran-3(*2H*)-ylidene)benzenesulfonamide **2e** (85.0 mg, 0.200 mmol, 1.0 equiv), Pd<sub>2</sub>(dba)<sub>3</sub> (9.2 mg, 0.010 mmol, 5 mol%) and **L13** (21.6 mg, 0.0400 mmol, 20 mol%). The tube was capped, evacuated and back-filled with argon for five times. Then degassed dry toluene (1.0 mL) and

cycloheptatriene **10** (32.0 μL, 0.200 mmol, 2.0 equiv) were added via syringe sequentially under argon atmosphere. The mixture was stirred at 90 °C for 48 h. After complete consumption of **2e**, the mixture was directly purified by flash chromatography on silica gel (EtOAc/petroleum ether = 1/50) to afford product **11**: 52.2 mg (0.0504 mmol), as a white solid, 50% yield; mp 241–242 °C; [α]<sub>D</sub><sup>25</sup> = –179.1 (*c* = 0.33 in CHCl<sub>3</sub>); 5:1 dr; 92% ee, determined by HPLC analysis (Daicel Chiralpak IC, *n*-Hexane/*i*-PrOH = 90/10, flow rate = 1.0 mL/min, λ = 254 nm) t<sub>R</sub> = 10.77 min (minor), t<sub>R</sub> = 19.23 min (major); Pure **11** for NMR analysis was obtained after recrystallisation. <sup>1</sup>H NMR (400 MHz, CDCl<sub>3</sub>) δ (ppm) 8.27–8.21 (m, 1H), 7.80–7.75 (m, 1H), 7.69–7.61 (m, 3H), 7.57 (d, *J* = 8.4 Hz, 1H), 7.48–7.42 (m, 2H), 7.35–7.30 (m, 3H), 7.28–7.26 (m, 1H), 7.23–7.21 (m, 1H), 6.47 (dd, *J* = 8.5, 1.8 Hz, 1H), 5.96–5.86 (m, 1H), 5.79 (ddd, *J* = 12.1, 7.1, 2.9 Hz, 1H), 5.71–5.64 (m, 1H), 5.58 (d, *J* = 12.3 Hz, 1H), 5.34–5.26 (m, 1H), 4.20 (d, *J* = 11.4 Hz, 1H), 2.45 (s, 3H), 2.34–2.25 (m, 1H), 2.13–2.05 (m, 1H), 1.99–1.86 (m, 1H); <sup>13</sup>C NMR (100 MHz, CDCl<sub>3</sub>) δ (ppm) 154.4, 150.4, 144.3, 136.3, 134.9, 133.3, 132.8, 132.7, 130.7, 130.0, 128.1, 128.0, 127.6, 127.51, 127.48, 126.2, 125.9, 125.7, 125.6, 124.6, 124.5, 123.1, 122.4, 117.4, 111.3, 62.7, 41.2, 38.5, 29.0, 21.7; HRMS (ESI-TOF) *m/z*: [M + Na]<sup>+</sup> Calcd for C<sub>33</sub>H<sub>27</sub>NO<sub>3</sub>SN<sup>+</sup> 540.1604; Found 540.1602.

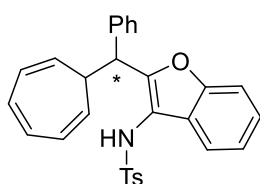

**Synthesis of 12:** To an oven dried 10 mL Schlenk tube equipped with a stirring bar were added *N*-((*E*)-2-((*Z*)-benzylidene)benzofuran-3(*2H*)-ylidene)-4-methylbenzenesulfonamide **2a** (37.5 mg, 0.100 mmol, 1.0 equiv), Pd<sub>2</sub>(dba)<sub>3</sub>

(4.6 mg, 0.0050 mmol, 5 mol%) and **L14** (15.2 mg, 0.0200 mmol, 20 mol%). The tube was capped, evacuated and back-filled with argon for five times. Then degassed dry toluene (1.0 mL) and cycloheptatriene **10** (16.0  $\mu$ L, 0.200 mmol, 2.0 equiv) were added via syringe sequentially under argon atmosphere. The mixture was stirred at 80  $^{\circ}$ C for 48 h. After complete consumption of **2a**, the mixture was directly purified by flash chromatography on silica gel (EtOAc/petroleum ether = 1/50) to afford **12**: 14.0 mg (0.0299 mmol), as a yellow oil, 30% yield;  $[\alpha]_D^{25} = -32.2$  ( $c = 0.34$  in  $\text{CHCl}_3$ ); 77% ee, determined by HPLC analysis (Daicel Chiralpak IH, *n*-Hexane/*i*-PrOH = 90/10, flow rate = 1.0 mL/min,  $\lambda = 254$  nm)  $t_R = 8.39$  min (minor),  $t_R = 9.77$  min (major);  $^1\text{H}$  NMR (400 MHz,  $\text{CDCl}_3$ )  $\delta$  (ppm) 7.68–7.62 (m, 2H), 7.37–7.33 (m, 1H), 7.25–7.21 (m, 4H), 7.19–7.15 (m, 3H), 7.05–7.00 (m, 1H), 6.97–6.91 (m, 1H), 6.77–6.63 (m, 2H), 6.16–6.08 (m, 2H), 5.95 (s, 1H), 5.21 (dd,  $J = 9.8, 6.0$  Hz, 1H), 5.07 (dd,  $J = 9.7, 6.1$  Hz, 1H), 4.39 (d,  $J = 11.8$  Hz, 1H), 2.79–2.68 (m, 1H), 2.37 (s, 3H);  $^{13}\text{C}$  NMR (100 MHz,  $\text{CDCl}_3$ )  $\delta$  (ppm) 156.3, 153.2, 144.1, 139.2, 136.6, 131.1, 130.6, 129.8, 128.7, 128.5, 127.6, 127.1, 125.7, 125.2, 125.1, 124.5, 124.2, 122.9, 118.8, 113.5, 111.5, 43.6, 42.3, 21.6; HRMS (ESI-ToF)  $m/z$ :  $[\text{M} + \text{Na}]^+$  Calcd for  $\text{C}_{29}\text{H}_{25}\text{NO}_3\text{SNa}^+$  490.1447; Found 490.1443.

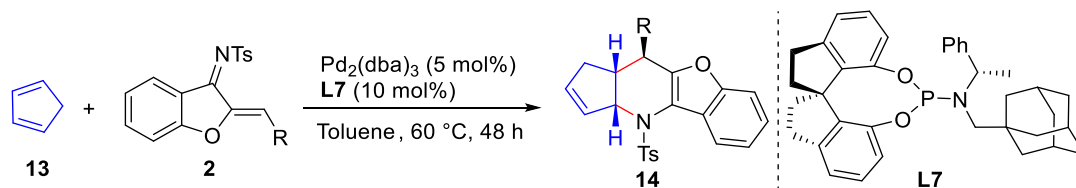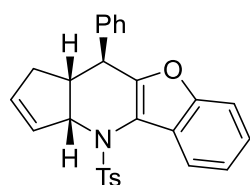

**Synthesis of 14a:** To an oven dried 10 mL Schlenk tube equipped with a stirring bar were added *N*-((*E*)-2-((*Z*)-benzylidene)benzofuran-3(*2H*)-ylidene)-4-methylbenzenesulfonamide **2a** (37.5 mg, 0.100 mmol, 1.0 equiv),  $\text{Pd}_2(\text{dba})_3$  (4.6 mg, 0.0050 mmol, 5 mol%) and **L7** (5.5 mg, 0.010 mmol, 10 mol%). The

tube was capped, evacuated and back-filled with argon for five times. Then degassed dry toluene (1.0 mL) and cyclopentadiene **13** (16.0  $\mu$ L, 0.200 mmol, 2.0 equiv) were added via syringe sequentially under argon atmosphere. The mixture was stirred at 60  $^{\circ}$ C for 48 h. After complete consumption of **2a**, the mixture was directly purified by flash chromatography on silica gel (petroleum ether/dichloromethane = 3/1) to afford product **14a**: 29.8 mg (0.0675 mmol), as a white solid, 68% yield; mp 160–162  $^{\circ}$ C;  $[\alpha]_D^{25} = +278.3$  ( $c = 0.46$  in  $\text{CHCl}_3$ ); 3:1 dr; 91% ee, determined by HPLC analysis (Daicel Chiralpak ID, *n*-Hexane/*i*-PrOH = 80/20, flow rate = 1.0 mL/min,  $\lambda = 254$  nm)  $t_R = 14.88$  min (major),  $t_R = 18.36$  min (minor);  $^1\text{H}$  NMR (400 MHz,  $\text{CDCl}_3$ )  $\delta$  (ppm) 8.22 (d,  $J = 7.7$  Hz, 1H), 7.56 (d,  $J = 8.0$  Hz, 2H), 7.36–7.22 (m, 7H), 7.21–7.16 (m, 1H), 7.13–7.06 (m, 2H), 6.50–6.38

(m, 2H), 5.93–5.80 (m, 2H), 5.35–5.24 (m, 1H), 3.55 (d,  $J = 7.1$  Hz, 1H), 2.45 (s, 3H), 2.43–2.37 (m, 1H), 2.30 (dd,  $J = 15.7, 2.8$  Hz, 1H), 2.22–2.12 (m, 1H);  $^{13}\text{C}$  NMR (100 MHz,  $\text{CDCl}_3$ )  $\delta$  (ppm) 153.6, 150.4, 144.1, 140.6, 134.0, 133.7, 130.3, 129.9, 128.4, 128.3, 128.2, 127.9, 127.1, 124.7, 124.5, 123.0, 122.6, 111.1, 66.2, 43.6, 43.5, 38.4, 21.6; HRMS (ESI-TOF)  $m/z$ :  $[\text{M} + \text{Na}]^+$  Calcd for  $\text{C}_{27}\text{H}_{23}\text{NO}_3\text{SNa}^+$  464.1291; Found 464.1297.

*Note: Racemic 14a–14c were obtained by using  $\text{Pd}_2(\text{dba})_3$  in combination with racemic L7.*

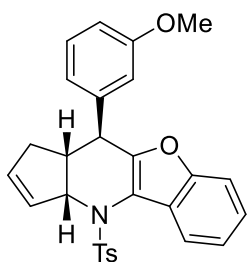

**Synthesis of 14b:** To an oven dried 10 mL Schlenk tube equipped with a stirring bar were added *N*-((*E*)-2-((*Z*)-3-methoxybenzylidene)benzofuran-3(*2H*)-ylidene)-4-methylbenzenesulfonamide **2b** (40.5 mg, 0.100 mmol, 1.0 equiv),  $\text{Pd}_2(\text{dba})_3$  (4.6 mg, 0.0050 mmol, 5 mol%) and **L7** (5.5 mg, 0.010 mmol, 10 mol%). The tube was capped, evacuated and back-filled with argon for five

times. Then degassed dry toluene (1.0 mL) and cyclopentadiene **13** (16.0  $\mu\text{L}$ , 0.200 mmol, 2.0 equiv) were added via syringe sequentially under argon atmosphere. The mixture was stirred at 60  $^\circ\text{C}$  for 48 h. After complete consumption of **2b**, the mixture was directly purified by flash chromatography on silica gel (petroleum ether/ dichloromethane = 3/1) to afford product **14b**: 31.9 mg, as a white solid (0.0676 mmol), 68% yield; mp 151–153  $^\circ\text{C}$ ;  $[\alpha]_{\text{D}}^{25} = +257.0$  ( $c = 0.46$  in  $\text{CHCl}_3$ ); 5:1 dr; 90% ee, determined by HPLC analysis (Daicel Chiralpak ID, *n*-Hexane/*i*-PrOH = 80/20, flow rate = 1.0 mL/min,  $\lambda = 254$  nm)  $t_{\text{R}} = 13.72$  min (major),  $t_{\text{R}} = 15.62$  min (minor);  $^1\text{H}$  NMR (400 MHz,  $\text{CDCl}_3$ )  $\delta$  (ppm) 8.31–8.16 (m, 1H), 7.60–7.48 (m, 2H), 7.34–7.21 (m, 6H), 7.05–6.99 (m, 1H), 6.72 (ddd,  $J = 8.3, 2.6, 0.9$  Hz, 1H), 6.21–6.12 (m, 1H), 6.01 (dt,  $J = 7.8, 1.2$  Hz, 1H), 5.91–5.79 (m, 2H), 5.37–5.13 (m, 1H), 3.75 (s, 3H), 3.52 (d,  $J = 7.3$  Hz, 1H), 2.42 (s, 3H), 2.46–2.36 (m, 1H), 2.29 (dd,  $J = 15.6, 3.0$  Hz, 1H), 2.18–2.10 (m, 1H);  $^{13}\text{C}$  NMR (100 MHz,  $\text{CDCl}_3$ )  $\delta$  (ppm) 153.6, 150.2, 144.3, 142.0, 134.0, 133.5, 130.3, 129.9, 129.4, 128.1, 124.7, 124.5, 122.9, 122.6, 120.3, 117.5, 115.0, 111.2, 111.1, 66.0, 55.1, 43.4, 43.2, 38.3, 21.6; HRMS (ESI-TOF)  $m/z$ :  $[\text{M} + \text{Na}]^+$  Calcd for  $\text{C}_{28}\text{H}_{25}\text{NO}_4\text{SNa}^+$  494.1397; Found 494.1395.

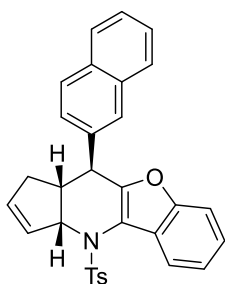

**Synthesis of 14c:** To an oven dried 10 mL Schlenk tube equipped with a stirring bar were added 4-methyl-*N*-((*Z,Z*)-2-(naphthalen-2-ylmethylene)-benzo furan-3(*2H*)-ylidene)benzenesulfonamide **2e** (42.6 mg, 0.100 mmol, 1.0 equiv),  $\text{Pd}_2(\text{dba})_3$  (4.6 mg, 0.0050 mmol, 5 mol%) and **L7** (5.5 mg, 0.010 mmol, 10 mol%). The tube was capped, evacuated and back-filled with argon for five times.

Then degassed dry toluene (1.0 mL) and cyclopentadiene **13** (16.0  $\mu$ L, 0.200 mmol, 2.0 equiv) were added via syringe sequentially under argon atmosphere. The mixture was stirred at 60  $^{\circ}$ C for 48 h. After complete consumption of **2e**, the mixture was directly purified by flash chromatography on silica gel (petroleum ether/dichloromethane = 3/1) to afford product **14c**: 25.4 mg (0.0517 mmol), as a white solid, 52% yield; mp 175–177  $^{\circ}$ C;  $[\alpha]_{\text{D}}^{25} = +345.7$  ( $c = 0.21$  in  $\text{CHCl}_3$ ); 6:1 dr; 87% ee, determined by HPLC analysis (Daicel Chiralpak ID, *n*-Hexane/*i*-PrOH = 80/20, flow rate = 1.0 mL/min,  $\lambda = 254$  nm)  $t_{\text{R}} = 14.88$  min (major),  $t_{\text{R}} = 18.83$  min (minor);  $^1\text{H}$  NMR (400 MHz,  $\text{CDCl}_3$ )  $\delta$  (ppm) 8.24 (dd,  $J = 7.8, 1.2$  Hz, 1H), 7.79–7.73 (m, 1H), 7.70–7.66 (m, 1H), 7.62–7.57 (m, 2H), 7.53–7.49 (m, 1H), 7.48–7.43 (m, 2H), 7.35–7.29 (m, 2H), 7.27–7.19 (m, 4H), 6.27 (dd,  $J = 8.5, 1.8$  Hz, 1H), 5.94–5.84 (m, 2H), 5.38–5.29 (m, 1H), 3.74 (d,  $J = 7.1$  Hz, 1H), 2.50–2.41 (m, 1H), 2.39 (s, 4H), 2.29–2.24 (m, 1H);  $^{13}\text{C}$  NMR (100 MHz,  $\text{CDCl}_3$ )  $\delta$  (ppm) 153.7, 150.3, 144.2, 137.8, 134.0, 133.7, 133.2, 132.5, 130.4, 129.9, 128.21, 128.17, 127.58, 127.55, 127.0, 126.3, 125.9, 125.3, 124.7, 124.6, 123.0, 122.7, 117.7, 111.1, 66.1, 43.6, 43.2, 38.4, 21.6; HRMS (ESI-TOF)  $m/z$ :  $[\text{M} + \text{Na}]^+$  Calcd for  $\text{C}_{31}\text{H}_{25}\text{NO}_3\text{SNa}^+$  514.1447; Found 514.1443.

## 5.2 Exploration of linear 1,3-dienes

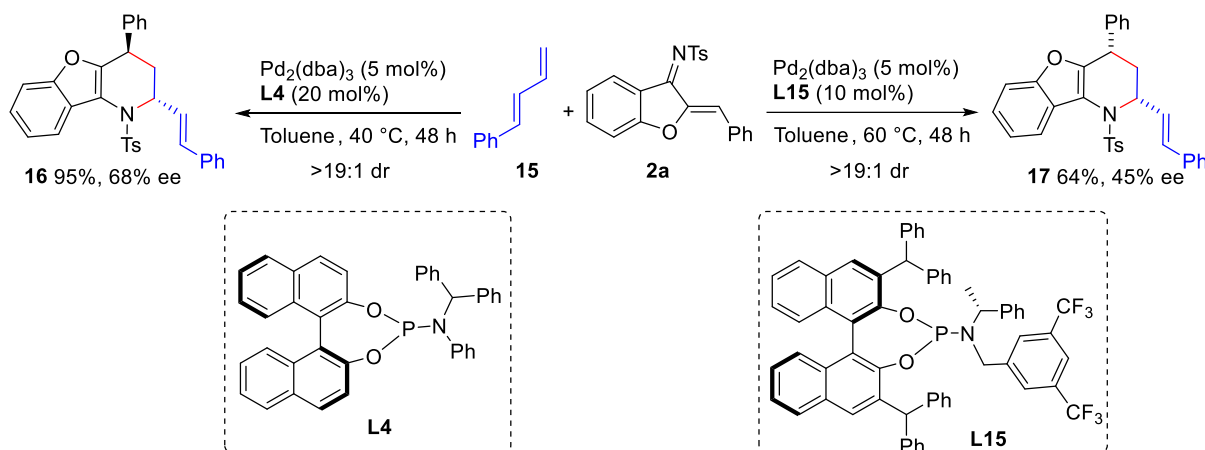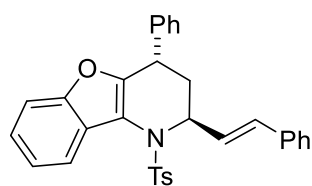

**Synthesis of 16:** To an oven-dried 10 mL tube equipped with a septum and a stirring bar were charged with  $\text{Pd}_2(\text{dba})_3$  (4.6 mg, 0.0050 mmol, 5 mol%) and **L4** (11.4 mg, 0.0200 mmol, 10 mol%), the tube was evacuated and backfilled with argon for three times, then degassed dry toluene (1.0 mL) was added via syringe. The mixture was stirred for 30 min at room temperature before transferred to another Schlenk tube containing (*E*)-buta-1,3-dien-1-ylbenzene **15** (26.0 mg, 0.200 mmol, 2.0 equiv) and *N*-((*E*)-2-((*Z*)-benzylidene)benzofuran-3(2*H*)-ylidene)-4-methylbenzenesulfonamide **2a** (37.5

mg, 0.100 mmol, 1.0 equiv) under argon atmosphere. The resultant mixture was stirred at 40 °C for 48 h. After completion, the mixture was purified by flash chromatography on silica gel (petroleum ether/DCM = 3/1) gave the product **16**: 48.2 mg (0.0953 mmol), as a white solid, 95% yield; mp = 255–257 °C; >19:1 dr;  $[\alpha]_D^{25} = -95.1$  ( $c = 0.23$  in  $\text{CHCl}_3$ ); 68% ee, determined by HPLC analysis [Chiralpak column IF *n*-Hexane/*i*-PrOH = 80/20, flow rate: 1.0 mL/min, 254 nm,  $t_R$  (major) = 9.81 min,  $t_R$  (minor) = 13.84 min];  $^1\text{H}$  NMR (400 MHz,  $\text{CDCl}_3$ ):  $\delta$  (ppm) 8.29 (d,  $J = 7.8$  Hz, 1H), 7.66–7.57 (m, 2H), 7.38–7.26 (m, 7H), 7.25–7.14 (m, 6H), 6.74–6.57 (m, 3H), 6.10 (dd,  $J = 15.9, 4.8$  Hz, 1H), 5.20–5.11 (m, 1H), 3.96 (dd,  $J = 11.6, 7.1$  Hz, 1H), 2.41 (s, 3H), 2.04 (ddd,  $J = 14.1, 7.1, 2.5$  Hz, 1H), 1.54–1.47 (m, 1H);  $^{13}\text{C}$  NMR (100 MHz,  $\text{CDCl}_3$ ):  $\delta$  (ppm) 154.0, 148.5, 144.2, 140.1, 136.1, 134.4, 132.1, 129.9, 128.51, 128.49, 128.0, 127.8, 127.6, 127.3, 126.5, 125.9, 124.7, 124.5, 123.1, 122.6, 118.1, 111.2, 58.4, 37.2, 34.5, 21.6; HRMS (ESI-TOF)  $m/z$ :  $[\text{M} + \text{Na}]^+$  Calcd for  $\text{C}_{32}\text{H}_{27}\text{NO}_3\text{SNa}^+$  528.1609; Found 528.1607.

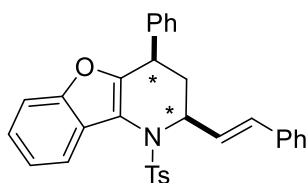

**Synthesis of 17:** To an oven dried 10 mL Schlenk tube equipped with a stirring bar were added *N*-((*E*)-2-((*Z*)-benzylidene)benzofuran-3(2*H*)-ylidene)-4-methylbenzenesulfonamide **2a** (37.5 mg, 0.100 mmol, 1.0 equiv),  $\text{Pd}_2(\text{dba})_3$  (4.6 mg, 0.0050 mmol, 5 mol%) and **L15** (18.8 mg,

0.0200 mmol, 10 mol%). The tube was capped, evacuated and back-filled with argon for five times. Then degassed dry toluene (1.0 mL) and (*E*)-buta-1,3-dien-1-ylbenzene **15** (26.0 mg, 0.200 mmol, 2.0 equiv) were added via syringe sequentially under argon atmosphere. The mixture was stirred at 60 °C for 48 h. After complete consumption of **2a**, the mixture was directly purified by flash chromatography on silica gel (DCM/petroleum ether = 1/3) to afford product **17**: 25.6 mg (0.0506 mmol), as a white solid, 51% yield; mp = 166–169 °C;  $[\alpha]_D^{25} = -30.0$  ( $c = 0.40$  in  $\text{CHCl}_3$ ); >19:1 dr; 45% ee, determined by HPLC analysis [Chiralpak column IF *n*-Hexane/*i*-PrOH = 80/20, flow rate: 1.0 mL/min, 254 nm,  $t_R$  (major) = 10.68 min,  $t_R$  (minor) = 20.86 min];  $^1\text{H}$  NMR (400 MHz,  $\text{CDCl}_3$ ):  $\delta$  (ppm) (ppm) 8.33 (dd,  $J = 7.3, 1.6$  Hz, 1H), 7.60–7.55 (m, 2H), 7.47–7.38 (m, 2H), 7.37–7.27 (m, 4H), 7.16–7.08 (m, 6H), 6.93–6.86 (m, 2H), 6.83–6.78 (m, 2H), 6.60 (dd,  $J = 15.9, 2.2$  Hz, 1H), 5.51 (dd,  $J = 15.8, 3.9$  Hz, 1H), 5.09–5.00 (m, 1H), 3.99 (d,  $J = 7.5$  Hz, 1H), 2.44 (s, 3H), 2.06–1.97 (m, 1H), 1.91–1.78 (m, 1H);  $^{13}\text{C}$  NMR (100 MHz,  $\text{CDCl}_3$ ):  $\delta$  (ppm) 153.8, 147.1, 144.2, 141.4, 136.3, 134.8, 130.1, 129.8, 128.41, 128.39, 128.2, 127.7, 127.6, 127.3, 126.53, 126.48, 124.7, 124.5, 123.1, 122.8, 118.8, 111.2, 56.7, 36.1, 33.2, 21.7; HRMS (ESI-TOF)  $m/z$ :  $[\text{M} + \text{Na}]^+$  Calcd for

$C_{32}H_{27}NO_3SNa^+$  528.1609; Found 528.1609. *Its relative configuration has been determined by X-ray diffraction analysis.*

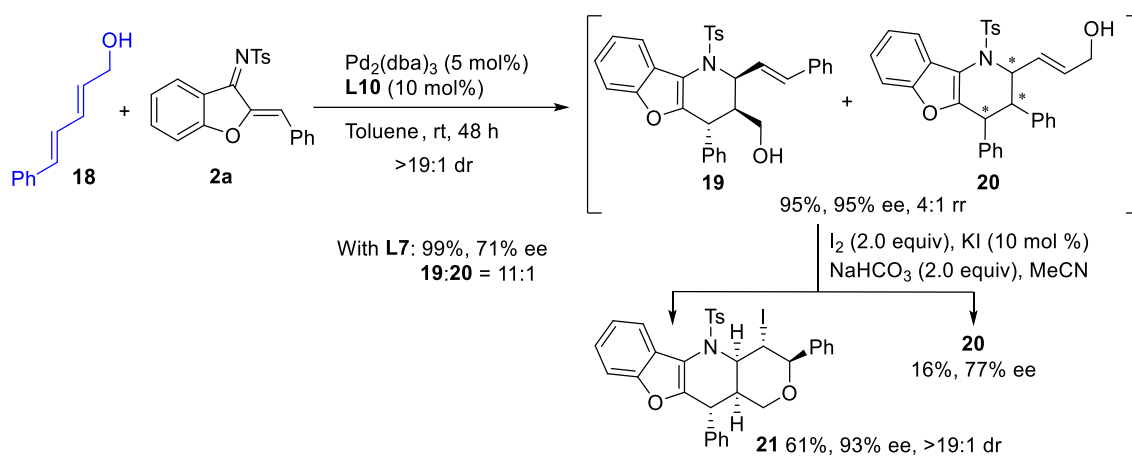

**Synthesis of 19:** To an oven dried 10 mL Schlenk tube equipped with a stirring bar were added *N*-((*E*)-2-((*Z*)-benzylidene)benzofuran-3(2*H*)-ylidene)-4-methylbenzenesulfonamide **2a** (37.5 mg, 0.100 mmol, 1.0 equiv), (*2E,4E*)-5-phenylpenta-2,4-dien-1-ol **18** (32.0 mg, 0.20 mmol, 2.0 equiv),  $Pd_2(dba)_3$  (4.6 mg, 0.0050 mmol, 5 mol%) and **L10** (6.4 mg, 0.020 mmol, 20 mol%). The tube was capped, evacuated and back-filled with argon for five times. Then dry distilled toluene (1.0 mL) was added via syringe under argon atmosphere. The mixture was stirred at room temperature for 48 h. After complete consumption of **2a**, the mixture was directly purified by flash chromatography on silica gel (petroleum ether/EA = 50/1) to afford product **19** and **20** as inseparable regioisomers: 50.9 mg (0.0950 mmol), 95% yield, as a white solid, mp = 200–202 °C;  $[\alpha]_D^{25} = -206.3$  ( $c = 0.42$  in  $CHCl_3$ ); 4:1 rr; 95% ee, determined by HPLC analysis [Chiralpak column ID *n*-Hexane/*i*-PrOH = 60/40, flow rate: 1.0 mL/min, 254 nm,  $t_R$  (major) = 5.59 min,  $t_R$  (minor) = 7.61 min].

**19:**  $^1H$  NMR (400 MHz,  $CDCl_3$ )  $\delta$  (ppm) 8.26 (dd,  $J = 7.3, 1.2$  Hz, 1H), 7.74–7.62 (m, 2H), 7.37–7.27 (m, 8H), 7.25–7.18 (m, 3H), 7.18–7.11 (m, 2H), 6.82 (d,  $J = 15.7$  Hz, 1H), 6.62–6.51 (m, 2H), 6.06 (dd,  $J = 15.8, 7.7$  Hz, 1H), 5.41–5.33 (m, 1H), 3.61 (d,  $J = 11.4$  Hz, 1H), 3.52–3.34 (m, 2H), 2.45 (s, 3H), 1.94–1.76 (m, 1H);  $^{13}C$  NMR (100 MHz,  $CDCl_3$ )  $\delta$  (ppm) 154.3, 148.3, 144.2, 138.6, 136.1, 135.0, 134.9, 129.9, 128.6, 128.5, 128.18, 128.16, 128.1, 127.6, 126.8, 124.8, 124.3, 123.1, 122.8, 121.5, 117.8, 111.2, 60.9, 60.8, 44.7, 39.9, 21.6; HRMS (ESI-TOF)  $m/z$ :  $[M + Na]^+$  Calcd for  $C_{33}H_{29}NO_3SNa^+$  558.1710; Found 558.1720.

**Synthesis of 21 and recovery of 20:** The above inseparable regioisomers **19** and **20** (4:1, 53.6 mg, 0.100 mmol, 1.0 equiv),  $I_2$  (50.6 mg, 0.200 mmol, 2.0 equiv), KI (1.7 mg, 0.010 mmol, 10 mol%) and

NaHCO<sub>3</sub> (16.8 mg, 0.200 mmol, 2.0 equiv) were added into CH<sub>3</sub>CN (0.5 mL). The mixture was stirred at 40 °C for 2 h under argon atmosphere. After complete consumption of **19**, the mixture was directly purified by flash chromatography on silica gel (petroleum ether/EtOAc = 20/1) to afford products **21** and **20**.

**21**: 40.3 mg (0.0609 mmol), as a white solid, 61% yield; mp = 169–171 °C; [ $\alpha$ ]<sub>D</sub><sup>25</sup> = –360.0 (*c* = 0.40 in CHCl<sub>3</sub>); 93% ee, determined by HPLC analysis [Chiralpak column AD *n*-Hexane/*i*-PrOH = 80/20, flow rate: 1.0 mL/min, 254 nm, *t*<sub>R</sub> (major) = 9.69 min, *t*<sub>R</sub> (minor) = 12.46 min]; <sup>1</sup>H NMR (400 MHz, CDCl<sub>3</sub>)  $\delta$  (ppm) 8.22–8.18 (m, 1H), 7.65–7.58 (m, 2H), 7.37–7.28 (m, 10H), 7.24–7.19 (m, 1H), 7.19–7.09 (m, 2H), 6.54–6.48 (m, 2H), 4.85 (dd, *J* = 11.3, 4.4 Hz, 1H), 4.69 (d, *J* = 10.6 Hz, 1H), 4.31 (d, *J* = 10.5 Hz, 1H), 4.07 (t, *J* = 10.9 Hz, 1H), 3.85–3.81 (dd, *J* = 12.3, 1.6 Hz, 1H), 3.72 (dd, *J* = 12.3, 2.1 Hz, 1H), 2.46 (s, 3H), 1.96–1.84 (m, 1H); <sup>13</sup>C NMR (100 MHz, CDCl<sub>3</sub>)  $\delta$  (ppm) 154.5, 148.0, 144.5, 139.2, 138.3, 134.7, 130.1, 129.0, 128.6, 128.5, 128.4, 128.1, 127.7, 127.6, 125.0, 124.3, 123.4, 122.4, 116.7, 111.3, 86.8, 77.3, 77.0, 76.7, 67.6, 64.7, 42.4, 39.1, 32.4, 21.6; HRMS (ESI-TOF) *m/z*: [M + Na]<sup>+</sup> Calcd for C<sub>33</sub>H<sub>28</sub>INO<sub>3</sub>SNa<sup>+</sup> 684.0676; Found 684.0672.

**20**: 8.7 mg, as a white solid, 16% yield (0.0162 mmol); mp = 130–132 °C; [ $\alpha$ ]<sub>D</sub><sup>25</sup> = +170.7 (*c* = 0.23 in CHCl<sub>3</sub>); 77% ee, determined by HPLC analysis [Chiralpak column ID *n*-Hexane/*i*-PrOH = 60/40, flow rate: 1.0 mL/min, 254 nm, *t*<sub>R</sub> (major) = 6.31 min, *t*<sub>R</sub> (minor) = 6.83 min]; <sup>1</sup>H NMR (400 MHz, CDCl<sub>3</sub>)  $\delta$  (ppm) 8.30–8.25 (m, 1H), 7.79–7.73 (m, 2H), 7.39 (d, *J* = 8.1 Hz, 2H), 7.37–7.34 (m, 1H), 7.33–7.31 (m, 2H), 7.24–7.22 (m, 1H), 7.22–7.19 (m, 1H), 7.19–7.13 (m, 1H), 7.09–7.04 (m, 1H), 7.03–6.98 (m, 4H), 6.54–6.48 (m, 2H), 5.65–5.59 (m, 2H), 5.03–4.93 (m, 1H), 4.28 (d, *J* = 11.8 Hz, 1H), 4.06–3.97 (m, 2H), 2.93 (dd, *J* = 11.9, 3.8 Hz, 1H), 2.47 (s, 3H); <sup>13</sup>C NMR (100 MHz, CDCl<sub>3</sub>)  $\delta$  (ppm) 154.4, 149.0, 144.5, 138.1, 136.8, 134.9, 134.2, 130.0, 129.0, 128.3, 128.2, 127.3, 127.1, 124.8, 124.3, 123.2, 122.6, 122.0, 111.4, 64.2, 62.6, 48.5, 41.2, 21.6; HRMS (ESI-TOF) *m/z*: [M + Na]<sup>+</sup> Calcd for C<sub>33</sub>H<sub>29</sub>NO<sub>3</sub>SNa<sup>+</sup> 558.1710; Found 558.1716.

### 5.3 Exploration of linear electron-deficient heterodienes

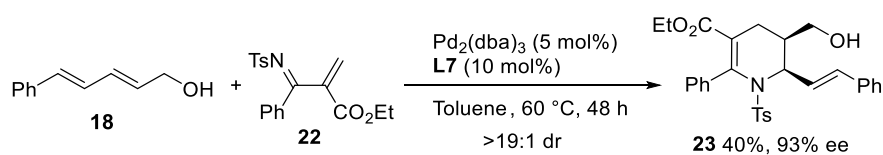



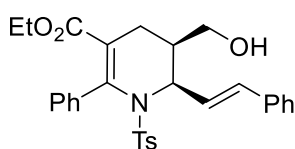

**Synthesis of 23:** To an oven dried 10 mL Schlenk tube equipped with a stirring bar were added ethyl (*Z*)-2-(phenyl(tosylimino)methyl) acrylate **22** (71.4 mg, 0.200 mmol, 1.0 equiv), 1,3-diene **18** (48.0 mg, 0.300 mmol, 1.5

equiv), Pd<sub>2</sub>(dba)<sub>3</sub> (9.2 mg, 0.010 mmol, 5 mol%) and **L7** (5.5 mg, 0.020 mmol, 10 mol%). The tube was evacuated and back-filled with argon for five times. Then degassed dry toluene (1.0 mL) was added via syringe under argon atmosphere. The mixture was stirred at 60 °C for 48 h. After complete consumption of **22**, the mixture was purified by flash chromatography on silica gel twice (petroleum ether/EtOAc = 10/1, dichloromethane/EtOAc = 50:1) to afford product **23**: 41.0 mg (0.0396 mmol), as a colorless oil, 40% yield; [α]<sub>D</sub><sup>25</sup> = -5.3 (*c* = 0.57 in CHCl<sub>3</sub>); 93% ee, determined by HPLC analysis [Chiralpak column ID *n*-Hexane/*i*-PrOH = 80/20, flow rate: 1.0 mL/min, 254 nm, t<sub>R</sub> (minor) = 20.05 min, t<sub>R</sub> (major) = 22.35 min]; <sup>1</sup>H NMR (400 MHz, CDCl<sub>3</sub>) δ (ppm) 7.43–7.38 (m, 2H), 7.37–7.32 (m, 2H), 7.32–7.16 (m, 5H), 7.13–7.08 (m, 4H), , 6.86 (d, *J* = 15.8 Hz, 1H), 6.14 (dd, *J* = 15.8, 8.6 Hz, 1H), 5.44 (dd, *J* = 8.6, 4.0 Hz, 1H), 3.84 (q, *J* = 7.2 Hz, 2H), 3.70 (dd, *J* = 11.0, 5.3 Hz, 1H), 3.49 (dd, *J* = 11.0, 8.9 Hz, 1H), 2.72 (dd, *J* = 18.5, 6.4 Hz, 1H), 2.36 (s, 3H), 2.31–2.15 (m, 1H), 2.01–1.83 (m, 1H), 0.83 (t, *J* = 7.2 Hz, 3H); <sup>13</sup>C NMR (100 MHz, CDCl<sub>3</sub>) δ (ppm) 168.4, 143.4, 142.9, 137.8, 136.3, 136.2, 135.3, 129.7, 129.3, 128.7, 128.23, 128.21, 127.1, 127.0, 126.7, 121.6, 117.9, 63.9, 60.4, 57.8, 39.3, 24.9, 21.5, 13.5; HRMS (ESI-TOF) *m/z*: [M + Na]<sup>+</sup> Calcd for C<sub>30</sub>H<sub>31</sub>NO<sub>5</sub>SNa<sup>+</sup> 540.1815; Found 540.1811.

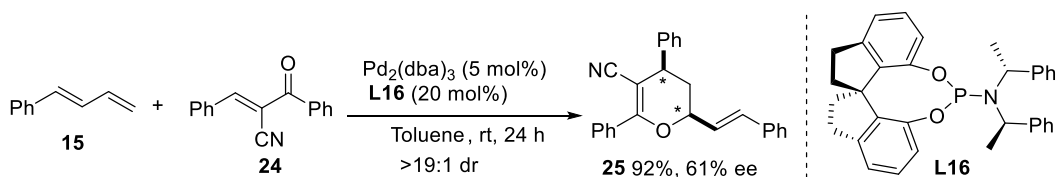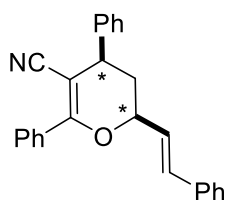

**Synthesis of 25:** To an oven dried 10 mL Schlenk tube equipped with with a stirring bar were added (*E*)-2-benzoyl-3-phenylacrylonitrile **24** (23.3 mg, 0.100 mmol, 1.0 equiv), (*E*)-buta-1,3-dien-1-ylbenzene **15** (26.0 mg, 0.200 mmol, 2.0

equiv), Pd<sub>2</sub>(dba)<sub>3</sub> (4.6 mg, 0.0050 mmol, 5 mol%) and **L16** (10.2 mg, 0.0200 mmol, 20 mol%). The tube was evacuated and back-filled with argon for five times. Then degassed dry toluene (1.0 mL) was added via syringe under argon atmosphere. The mixture was stirred at rt for 24 h. After complete consumption of **24**, the mixture was directly purified by flash chromatography on silica gel (DCM/petroleum ether = 1/3) to afford product **25**: 33.4 mg (0.092 mmol), as a white

semi-solid, 92% yield; mp = 82–84 °C; >19:1 dr;  $[\alpha]_D^{25} = +15.2$  ( $c = 0.32$  in  $\text{CHCl}_3$ ); 61% ee, determined by HPLC analysis [Chiralpak column IB  $n$ -Hexane/ $i$ -PrOH = 80/20, flow rate: 1.0 mL/min, 254 nm,  $t_R$  (minor) = 16.68 min,  $t_R$  (major) = 17.68 min];  $^1\text{H}$  NMR (400 MHz,  $\text{CDCl}_3$ )  $\delta$  (ppm) 7.76 (dd,  $J = 7.7, 1.9$  Hz, 2H), 7.47–7.19 (m, 13H), 6.69 (d,  $J = 16.0$  Hz, 1H), 6.23 (dd,  $J = 16.0, 6.5$  Hz, 1H), 4.83 (dd,  $J = 11.3, 6.6$  Hz, 1H), 3.84 (dd,  $J = 11.5, 6.5$  Hz, 1H), 2.37 (ddd,  $J = 14.1, 6.5, 1.9$  Hz, 1H), 2.01–1.87 (m, 1H);  $^{13}\text{C}$  NMR (100 MHz,  $\text{CDCl}_3$ )  $\delta$  (ppm) 166.2, 141.2, 135.8, 133.1, 133.0, 130.9, 129.0, 128.7, 128.38, 128.36, 128.3, 127.63, 127.59, 126.6, 126.3, 119.6, 88.4, 78.5, 41.5, 37.8; HRMS (ESI-TOF)  $m/z$ :  $[\text{M} + \text{Na}]^+$  Calcd for  $\text{C}_{26}\text{H}_{21}\text{NO}_3\text{SNa}^+$  386.1515; Found 386.1515. Its relative configuration has been determined by X-ray diffraction analysis.

#### 5.4 Unsuccessful substrates attempts

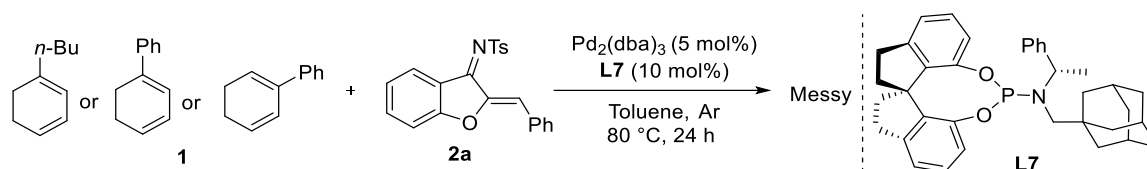

To further expand the substrate scope, some differently substituted 1,3-cyclohexadiene were tested under the optimal conditions. Unfortunately, complex reaction profiles were generally observed as outlined above.

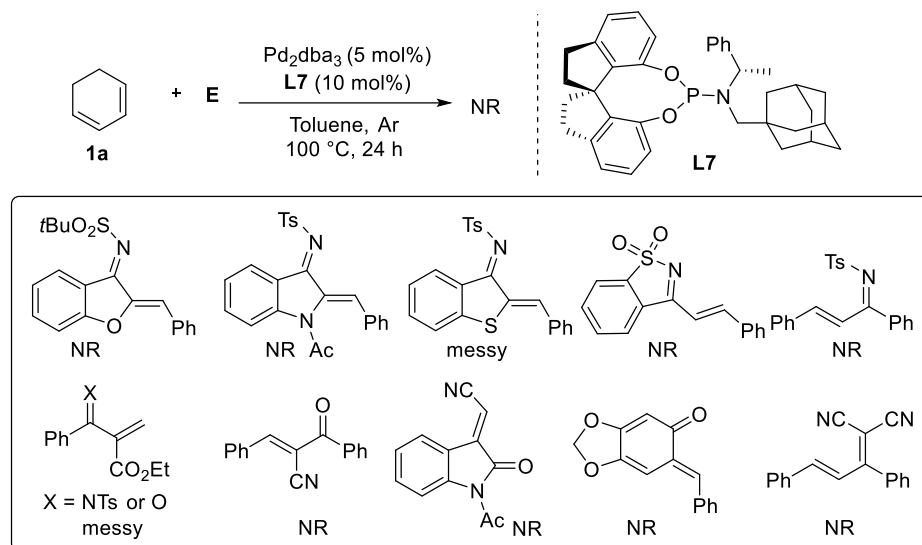

Meanwhile, the above outlined electron-deficient dienes were inert to the reaction under the optimized conditions.

## 6. Mechanism investigation

### 6.1 Control experiments

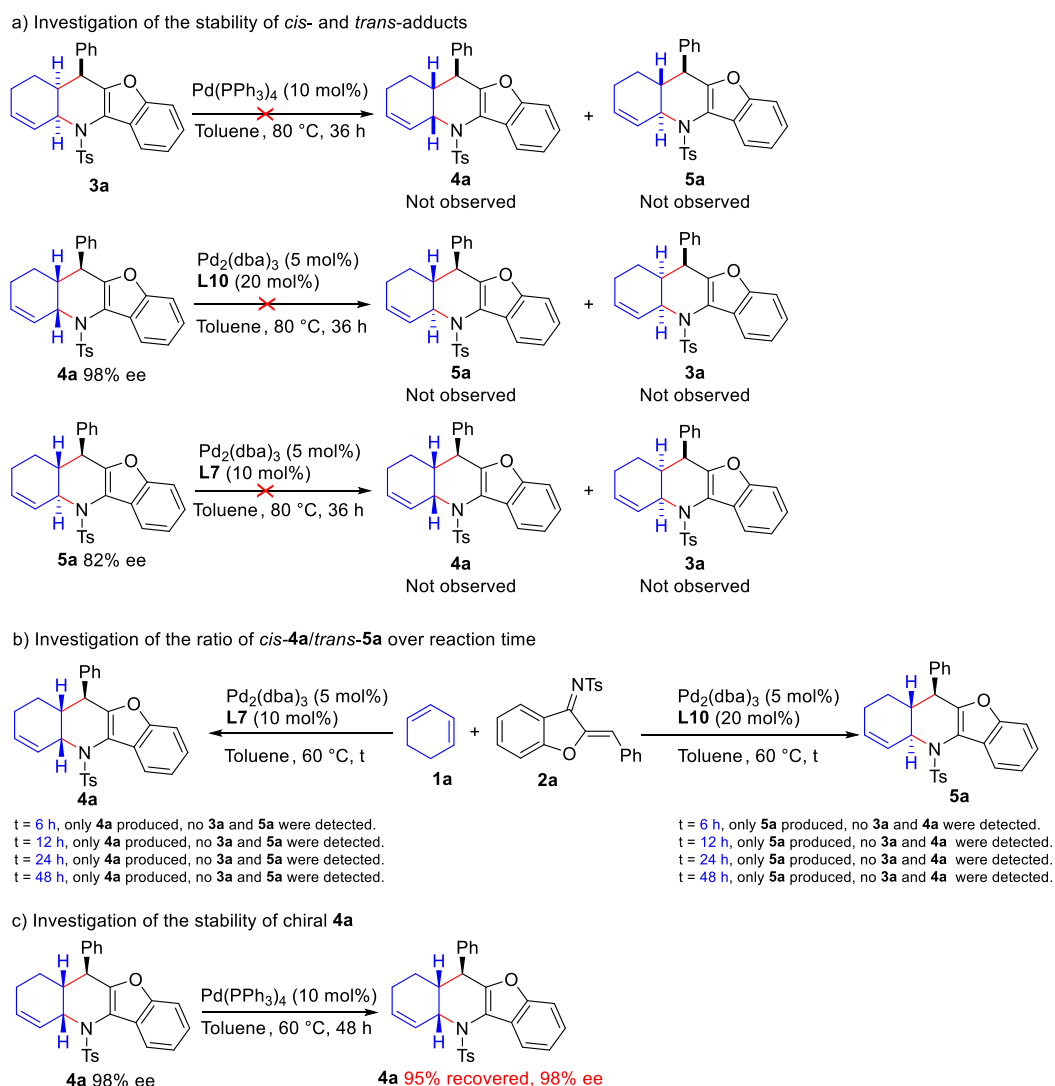

**Figure S1** Control experiments to elucidate the stability of products

As demonstrated above, products *endo-cis*-**3a**, *exo-cis*-**4a** and *trans*-**5a** were not interconvertible under diverse catalytic conditions, even at high temperature. The ratio of *cis*-**4a**/*trans*-**5a** was not changed along the reaction process, according to the  $^1\text{H}$  NMR analysis of the reaction solution in 6 h, 12 h, 24 h, and 48 h, respectively. In addition, the enantioselectivity of chiral **4a** kept unchanged when exposed to  $\text{Pd(PPh}_3)_4$ . These results well demonstrated that the annulations of cyclic 1,3-dienes and 1-azadienes was irreversible, and the diastereoselectivity was controlled by ligand rather than thermodynamics.

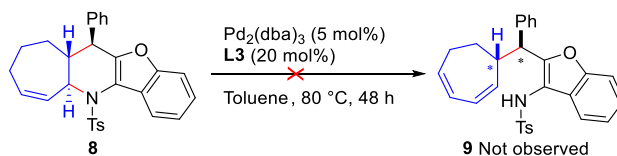

Treatment of **8** with Pd<sub>2</sub>(dba)<sub>3</sub>/L3 in toluene at 80 °C for 48 h did not lead to the formation of **9**, which indicated that **8**, although bearing an allylic amine moiety, was stable and would not undergo ring opening under the catalysis of palladium.

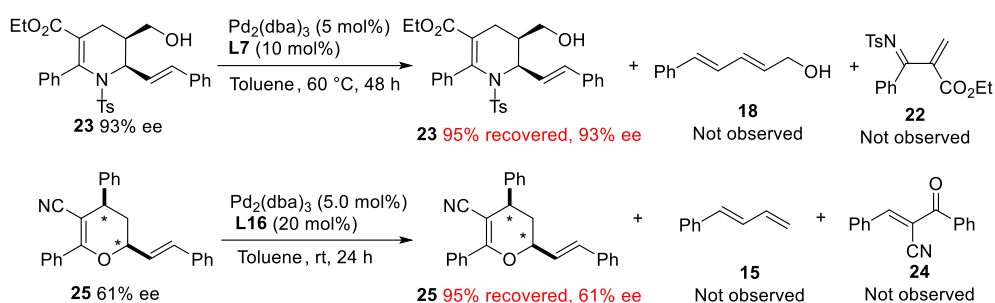

No obvious transformations were observed by treatment of enantioenriched **23** or **25** with Pd<sub>2</sub>(dba)<sub>3</sub>/L7. Chiral **23** and **25** with unchanged enantioselectivity were recovered quantitatively. *The results further indicated that the reaction involving linear 1,3-diene was also irreversible.*

## 6.2 Proposed origin of the divergent diastereoselectivity

The above control experiments confirmed that the formation of both *cis*-**4a** and *trans*-**5a** was a stepwise cascade vinylogous Michael addition/allylic amination process. According to our previous works (*JACS*, **2021**, *143*, 4809; *ACIE*, **2021**, *60*, 26762), vinylogous Michael addition of HOMO-raised η<sup>2</sup>-complex I-A of Pd<sup>0</sup> with 1,3-cyclohexadiene **1a** to 1-azadiene **2a** from *Si*-face in an outer sphere pattern led to the generation of intermediate II-A, as illustrated in Figure S2. Because of the large steric hindrance of L7, subsequent intramolecular nucleophilic substitution of allylic Pd<sup>II</sup> complex with N-Ts moiety would proceed through an outer-sphere manner to furnish *cis*-**4a**. This proposal was further confirmed by utilizing small dimethylamine-substituted ligand L20, which delivered *trans*-**5a** predominantly.

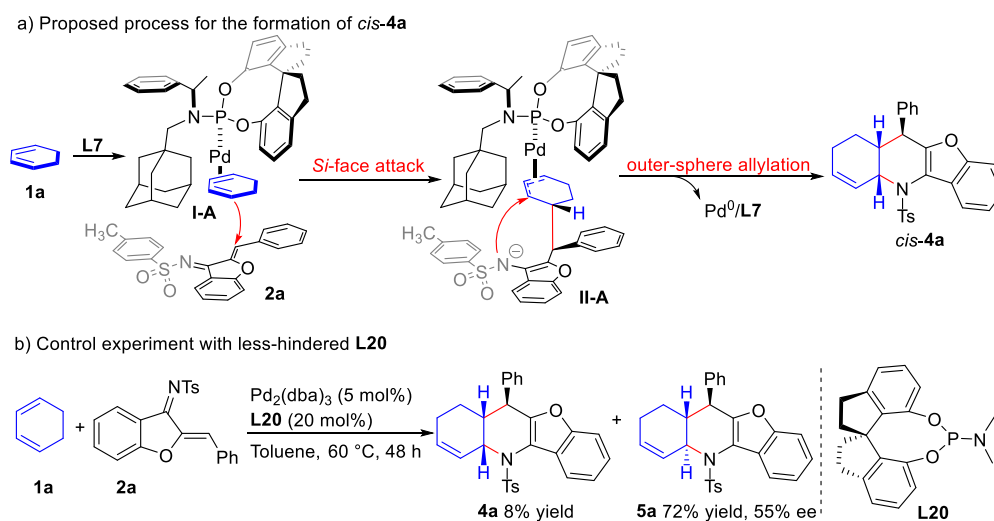

**Figure S2** Proposed mechanism for the formation of *cis*-**4a** and control experiment

On the other hand, as illustrated in Figure S3, 1,3-cyclohexadiene **1a** and Pd<sub>2</sub>(dba)<sub>3</sub> complexed with two molecular of **L10** to form highly reactive complex **I-B**, which attacked 1-azadiene **2a** from *Si*-face to form species **II-B**. In this case, the carbon-carbon bond rotation and ligand exchange of **II-B** were liable to form more stable electron-neutral **IV-B**, since the less bulky of **L10**. Subsequent reductive elimination delivered *trans*-**5a**. In conclusion, the inner sphere allylic amination step caused by small steric hinderance of **L10** might be responsible for the observed *trans*-diastereoselectivity. The necessity of two equivalent of **L10** (with regard to palladium) and the effect of less steric hindered ligand were validated by control experiments S3b and S2b, respectively.

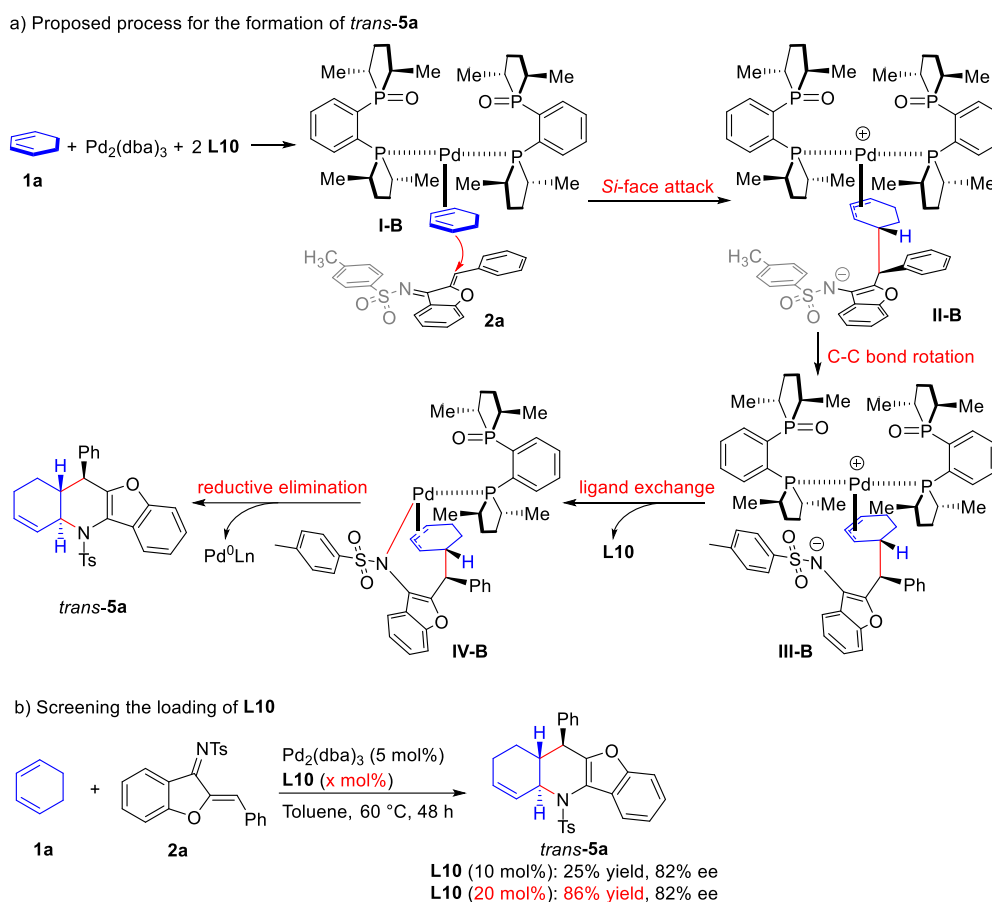

**Figure S3** Proposed mechanism for the formation of *trans*-**5a** and control experiment

### 6.3 DFT calculations for the reaction of 1-azadiene **2a** and 1,3-butadiene **15**

The mechanism for the reaction of **2a** and **15** with/without Pd(PPh<sub>3</sub>)<sub>4</sub> was calculated for further elucidating the catalytic process. The assembly of **2a** and **15** without palladium is a concerted Diels–Alder process. We calculated the **diene-endo-TS** and **diene-exo-TS** for the formation of *endo*-product **17** and *exo*-product **16**, and found the energy of **diene-endo-TS** with a value of 27.1 kcal/mol related to the energy summary of **15** and **2a**, was 4.6 kcal/mol lower than **diene-exo-TS**. These results were consistent with the results that **17** was produced with excellent *endo*-diastereoselectivity upon heating. On the other hand, the reaction mechanism of **2a** and **15** in the presence of Pd(PPh<sub>3</sub>)<sub>4</sub> is a

stepwise process. Different configurations for the first addition step of the C-C bond formation have been calculated and the energy barriers were similar from **2a-TS1** and **2a-TS1'**, and the lower one with a value of 25.8 kcal/mol (**2a-TS1'**). Because **2a-INT1** and **2a-INT1'** could isomerize to each other via C-C bond rotation, the diastereoselectivity was determined by the second step. The energy of **diene-Pd-exo-TS** was 3.8 kcal/mol lower than that of **diene-Pd-endo-TS**, suggesting the *exo*-product **16** could be produced preferably, which is consistent with the experimental results.

Comparing the two reaction [with/without Pd(PPh<sub>3</sub>)<sub>4</sub>], the reaction of **2a** and **15** in the absence of Pd(PPh<sub>3</sub>)<sub>4</sub> needed higher temperature as the energy barriers was 27.1 kcal/mol, which was 1.3 kcal/mol higher than the highest energy barrier of the reaction with Pd(PPh<sub>3</sub>)<sub>4</sub> (25.8 kcal/mol). Thanks to the Pd<sup>0</sup>- $\pi$ -Lewis base activation, **INT1** showed significantly raised reactivity than parent **15**. These DFT calculations were consistent with the experimental results.

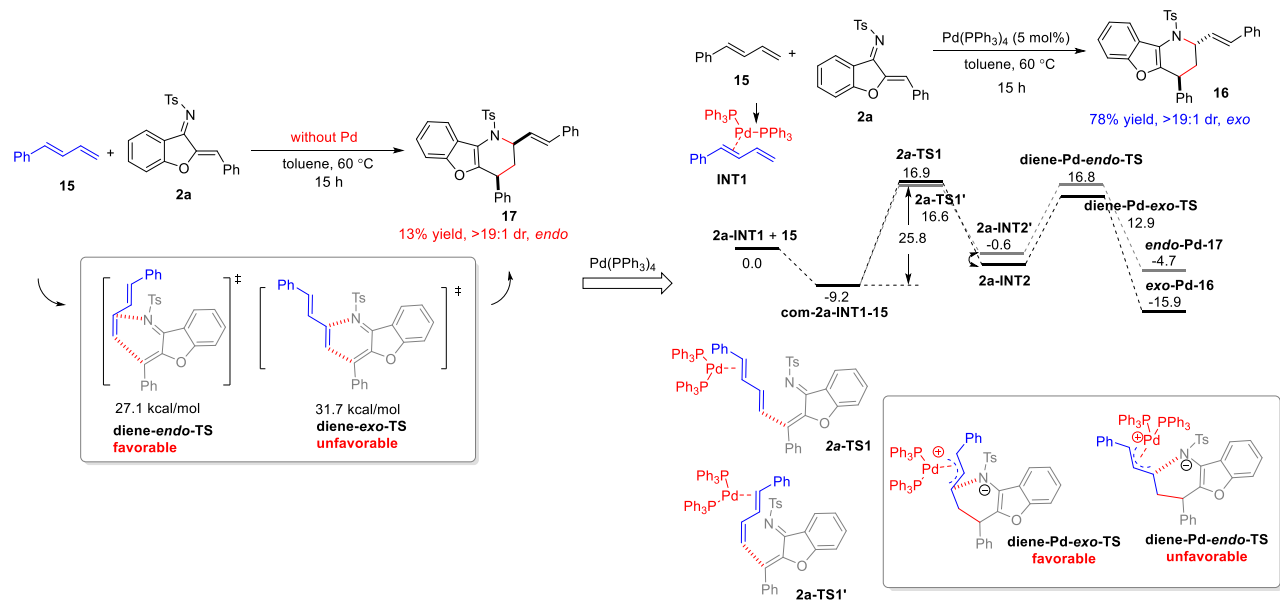

**Figure S4** Computed potential energy surface of the reaction of **2a** and **15** with/without Pd(PPh<sub>3</sub>)<sub>4</sub> at the B3LYP-D3/6-31(d)//B3LYP-D3/6-311++G(d,p) and SDD for Pd (toluene) level and are given in kcal/mol.

## 7. Crystal data and structural refinement

**Procedure for the recrystallization of racemic 3a:** To a 10 mL tube containing **3a** (16 mg) were added *n*-hexane (2 mL) and THF (2.5 mL). The mixture was heated until a clear solution was formed, which was kept aside at room temperature to obtain crystals. The crystals were subjected for single crystal XRD to determine the relative configuration of **3a**. The data were collected by Bruker APEX-II CCD equipped with a Mo radiation source ( $K\alpha = 0.71073 \text{ \AA}$ ) at 290.0 K. CCDC 2050825 (**3a**) contains the supplementary crystallographic data for this paper. These data can be obtained free of

charge via [www.ccdc.cam.ac.uk/data\\_request/cif](http://www.ccdc.cam.ac.uk/data_request/cif).

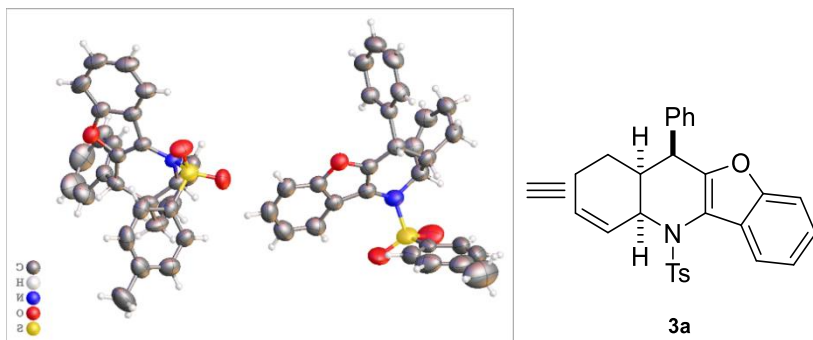

(ellipsoid contour probability 50%)

|                                        |                                                                |
|----------------------------------------|----------------------------------------------------------------|
| Identification code                    | <b>3a</b>                                                      |
| Empirical formula                      | C <sub>28</sub> H <sub>25</sub> NO <sub>3</sub> S              |
| Formula weight                         | 455.55                                                         |
| Temperature/K                          | 290.0                                                          |
| Crystal system                         | triclinic                                                      |
| Space group                            | P-1                                                            |
| a/Å                                    | 11.6139(7)                                                     |
| b/Å                                    | 13.4764(10)                                                    |
| c/Å                                    | 14.9925(10)                                                    |
| $\alpha$ /°                            | 92.051(3)                                                      |
| $\beta$ /°                             | 93.362(3)                                                      |
| $\gamma$ /°                            | 94.406(3)                                                      |
| Volume/Å <sup>3</sup>                  | 2333.7(3)                                                      |
| Z                                      | 4                                                              |
| $\rho_{\text{calc}}/\text{cm}^3$       | 1.297                                                          |
| $\mu/\text{mm}^{-1}$                   | 0.169                                                          |
| F(000)                                 | 960.0                                                          |
| Crystal size/mm <sup>3</sup>           | 0.3 × 0.3 × 0.2                                                |
| Radiation                              | MoK $\alpha$ ( $\lambda$ = 0.71073)                            |
| 2 $\theta$ range for data collection/° | 3.994 to 55.098                                                |
| Index ranges                           | -15 ≤ h ≤ 14, -17 ≤ k ≤ 17, -19 ≤ l ≤ 19                       |
| Reflections collected                  | 85300                                                          |
| Independent reflections                | 10757 [R <sub>int</sub> = 0.1297, R <sub>sigma</sub> = 0.1036] |
| Data/restraints/parameters             | 10757/0/597                                                    |

|                                                |                                  |
|------------------------------------------------|----------------------------------|
| Goodness-of-fit on $F^2$                       | 1.038                            |
| Final R indexes [ $I \geq 2\sigma(I)$ ]        | $R_1 = 0.0603$ , $wR_2 = 0.1328$ |
| Final R indexes [all data]                     | $R_1 = 0.1390$ , $wR_2 = 0.1605$ |
| Largest diff. peak/hole / $e \text{ \AA}^{-3}$ | 0.17/-0.33                       |

**Procedure for the recrystallization of chiral 4a:** To a 10 mL tube containing **4a** (20 mg) were added *n*-hexane (2 mL) and *i*-PrOH (2.5 mL). The mixture was heated until a clear solution was formed, which was kept aside at room temperature to obtain crystals. The crystals were subjected for single crystal XRD to determine the absolute configuration of **4a**. The data were collected by an Agilent Gemini equipped a Cu radiation source ( $K\alpha = 1.54184 \text{ \AA}$ ) at 292.90 K. CCDC 2050826 (**4a**) contains the supplementary crystallographic data for this paper. These data can be obtained free of charge via [www.ccdc.cam.ac.uk/data\\_request/cif](http://www.ccdc.cam.ac.uk/data_request/cif).

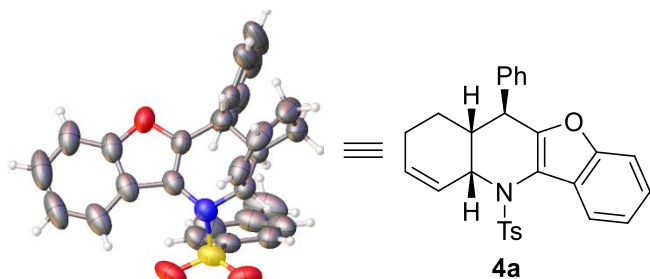

(ellipsoid contour probability 50%)

|                        |                     |
|------------------------|---------------------|
| Identification code    | <b>4a</b>           |
| Empirical formula      | $C_{28}H_{25}NO_3S$ |
| Formula weight         | 455.55              |
| Temperature/K          | 292.90(10)          |
| Crystal system         | orthorhombic        |
| Space group            | $P2_12_12_1$        |
| $a/\text{\AA}$         | 11.0546(3)          |
| $b/\text{\AA}$         | 11.54205(18)        |
| $c/\text{\AA}$         | 18.2492(4)          |
| $\alpha/^\circ$        | 90                  |
| $\beta/^\circ$         | 90                  |
| $\gamma/^\circ$        | 90                  |
| Volume/ $\text{\AA}^3$ | 2328.47(8)          |
| Z                      | 4                   |



|                                                |                                                               |
|------------------------------------------------|---------------------------------------------------------------|
| $\rho_{\text{calc}}/\text{cm}^3$               | 1.299                                                         |
| $\mu/\text{mm}^{-1}$                           | 1.475                                                         |
| F(000)                                         | 960.0                                                         |
| Crystal size/ $\text{mm}^3$                    | $0.4 \times 0.2 \times 0.1$                                   |
| Radiation                                      | $\text{CuK}\alpha$ ( $\lambda = 1.54184$ )                    |
| $2\Theta$ range for data collection/ $^\circ$  | 9.066 to 142.848                                              |
| Index ranges                                   | $-13 \leq h \leq 13, -14 \leq k \leq 8, -21 \leq l \leq 22$   |
| Reflections collected                          | 12665                                                         |
| Independent reflections                        | 4476 [ $R_{\text{int}} = 0.0352, R_{\text{sigma}} = 0.0307$ ] |
| Data/restraints/parameters                     | 4476/0/299                                                    |
| Goodness-of-fit on $F^2$                       | 1.049                                                         |
| Final R indexes [ $I \geq 2\sigma(I)$ ]        | $R_1 = 0.0564, wR_2 = 0.1522$                                 |
| Final R indexes [all data]                     | $R_1 = 0.0596, wR_2 = 0.1590$                                 |
| Largest diff. peak/hole / $e \text{ \AA}^{-3}$ | 0.27/-0.27                                                    |
| Flack parameter                                | 0.011(12)                                                     |

**Procedure for the recrystallization of chiral 5e:** To a 10 mL tube containing **5e** (15 mg) were added *n*-hexane (1.5 mL) and *i*-PrOH (2.5 mL). The mixture was heated until a clear solution was formed, which was kept aside at room temperature to obtain crystals. The crystals were subjected for single crystal XRD to determine the absolute configuration of **5e**. The data were collected by a Bruker APEX-II CCD equipped with a Mo radiation source ( $K\alpha = 0.71073 \text{ \AA}$ ) at 301.0 K. CCDC 2219802 (**5e**) contains the supplementary crystallographic data for this paper. These data can be obtained free of charge via [www.ccdc.cam.ac.uk/data\\_request/cif](http://www.ccdc.cam.ac.uk/data_request/cif).

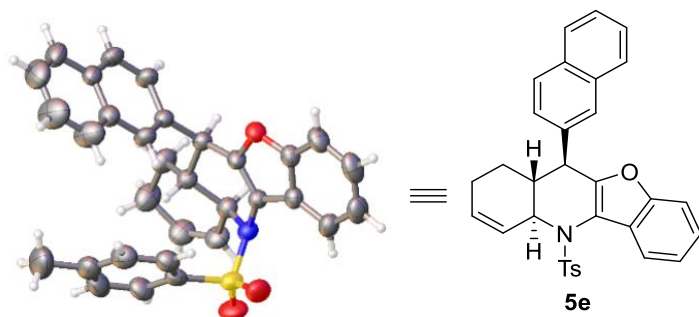

(ellipsoid contour probability 50%)

|                     |                                                 |
|---------------------|-------------------------------------------------|
| Identification code | <b>5e</b>                                       |
| Empirical formula   | $\text{C}_{32}\text{H}_{27}\text{NO}_3\text{S}$ |

|                                             |                                                               |
|---------------------------------------------|---------------------------------------------------------------|
| Formula weight                              | 505.60                                                        |
| Temperature/K                               | 301.0                                                         |
| Crystal system                              | orthorhombic                                                  |
| Space group                                 | P2 <sub>1</sub> 2 <sub>1</sub> 2 <sub>1</sub>                 |
| a/Å                                         | 8.7448(3)                                                     |
| b/Å                                         | 12.1996(5)                                                    |
| c/Å                                         | 23.9382(10)                                                   |
| $\alpha$ /°                                 | 90                                                            |
| $\beta$ /°                                  | 90                                                            |
| $\gamma$ /°                                 | 90                                                            |
| Volume/Å <sup>3</sup>                       | 2553.80(17)                                                   |
| Z                                           | 4                                                             |
| $\rho_{\text{calc}}/\text{cm}^3$            | 1.315                                                         |
| $\mu/\text{mm}^{-1}$                        | 0.162                                                         |
| F(000)                                      | 1064.0                                                        |
| Crystal size/mm <sup>3</sup>                | 0.36 × 0.15 × 0.13                                            |
| Radiation                                   | MoK $\alpha$ ( $\lambda$ = 0.71073)                           |
| 2 $\Theta$ range for data collection/°      | 4.768 to 55.018                                               |
| Index ranges                                | -11 ≤ h ≤ 11, -15 ≤ k ≤ 15, -31 ≤ l ≤ 31                      |
| Reflections collected                       | 38309                                                         |
| Independent reflections                     | 5866 [R <sub>int</sub> = 0.0960, R <sub>sigma</sub> = 0.0518] |
| Data/restraints/parameters                  | 5866/0/335                                                    |
| Goodness-of-fit on F <sup>2</sup>           | 1.008                                                         |
| Final R indexes [I ≥ 2 $\sigma$ (I)]        | R <sub>1</sub> = 0.0389, wR <sub>2</sub> = 0.0801             |
| Final R indexes [all data]                  | R <sub>1</sub> = 0.0727, wR <sub>2</sub> = 0.0915             |
| Largest diff. peak/hole / e Å <sup>-3</sup> | 0.13/-0.25                                                    |
| Flack parameter                             | -0.01(4)                                                      |

**Procedure for the recrystallization of chiral 11:** To a 10 mL tube containing **11** (15 mg) were added *n*-hexane (1.5 mL) and EtOAc (2.5 mL). The mixture was heated until a clear solution was formed, which was kept aside at room temperature to obtain crystals. The crystals were subjected for single crystal XRD to determine the absolute configuration of **11**. The data were collected by a Bruker APEX-II CCD equipped with a Mo radiation source (K $\alpha$  = 0.71073 Å) at 273.15 K. CCDC 2219803

(11) contains the supplementary crystallographic data for this paper. These data can be obtained free of charge via [www.ccdc.cam.ac.uk/data\\_request/cif](http://www.ccdc.cam.ac.uk/data_request/cif).

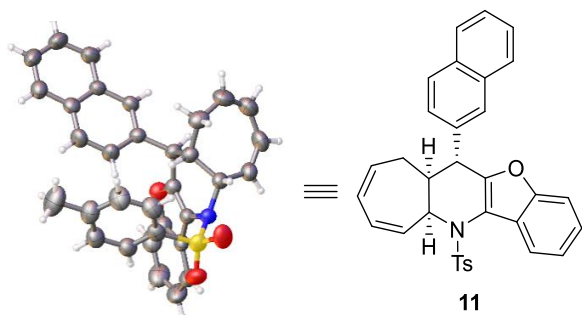

(ellipsoid contour probability 50%)

|                                               |                                                               |
|-----------------------------------------------|---------------------------------------------------------------|
| Identification code                           | <b>11</b>                                                     |
| Empirical formula                             | $C_{33}H_{27}NO_3S$                                           |
| Formula weight                                | 517.61                                                        |
| Temperature/K                                 | 273.15                                                        |
| Crystal system                                | monoclinic                                                    |
| Space group                                   | $P2_1$                                                        |
| $a/\text{\AA}$                                | 9.7335(10)                                                    |
| $b/\text{\AA}$                                | 12.7669(13)                                                   |
| $c/\text{\AA}$                                | 10.7629(11)                                                   |
| $\alpha/^\circ$                               | 90                                                            |
| $\beta/^\circ$                                | 90.849(4)                                                     |
| $\gamma/^\circ$                               | 90                                                            |
| Volume/ $\text{\AA}^3$                        | 1337.3(2)                                                     |
| Z                                             | 2                                                             |
| $\rho_{\text{calc}}/\text{cm}^3$              | 1.285                                                         |
| $\mu/\text{mm}^{-1}$                          | 0.156                                                         |
| F(000)                                        | 544.0                                                         |
| Crystal size/ $\text{mm}^3$                   | $0.31 \times 0.23 \times 0.11$                                |
| Radiation                                     | MoK $\alpha$ ( $\lambda = 0.71073$ )                          |
| $2\theta$ range for data collection/ $^\circ$ | 4.186 to 55.136                                               |
| Index ranges                                  | $-12 \leq h \leq 12, -16 \leq k \leq 16, -13 \leq l \leq 14$  |
| Reflections collected                         | 28070                                                         |
| Independent reflections                       | 6155 [ $R_{\text{int}} = 0.0588, R_{\text{sigma}} = 0.0466$ ] |

|                                                |                                  |
|------------------------------------------------|----------------------------------|
| Data/restraints/parameters                     | 6155/1/344                       |
| Goodness-of-fit on $F^2$                       | 1.027                            |
| Final R indexes [ $I \geq 2\sigma(I)$ ]        | $R_1 = 0.0540$ , $wR_2 = 0.1333$ |
| Final R indexes [all data]                     | $R_1 = 0.0738$ , $wR_2 = 0.1450$ |
| Largest diff. peak/hole / $e \text{ \AA}^{-3}$ | 0.56/-0.22                       |
| Flack parameter                                | 0.08(3)                          |

**Procedure for the recrystallization of chiral 16:** To a 10 mL tube containing **16** (15 mg) were added *n*-hexane (1.5 mL) and THF (2.5 mL). The mixture was heated until a clear solution was formed, which was kept aside at room temperature to obtain crystals. The crystals were subjected for single crystal XRD to determine the absolute configuration of **16**. The data were collected by a Bruker APEX-II CCD equipped with a Mo radiation source ( $K\alpha = 0.71073 \text{ \AA}$ ) at 300.0 K. CCDC 2219804 (**16**) contains the supplementary crystallographic data for this paper. These data can be obtained free of charge via [www.ccdc.cam.ac.uk/data\\_request/cif](http://www.ccdc.cam.ac.uk/data_request/cif).

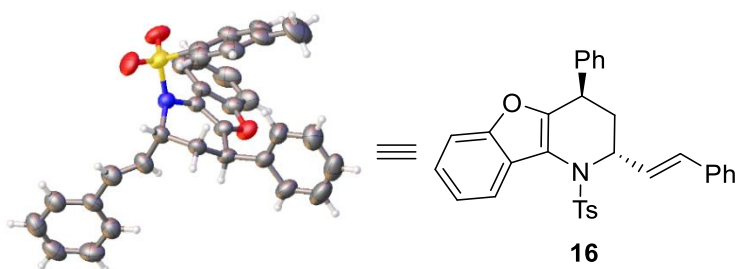

(ellipsoid contour probability 50%)

|                     |                     |
|---------------------|---------------------|
| Identification code | <b>16</b>           |
| Empirical formula   | $C_{32}H_{27}NO_3S$ |
| Formula weight      | 505.60              |
| Temperature/K       | 300.0               |
| Crystal system      | orthorhombic        |
| Space group         | $P2_12_12_1$        |
| $a/\text{\AA}$      | 7.9263(6)           |
| $b/\text{\AA}$      | 10.6732(11)         |
| $c/\text{\AA}$      | 31.221(3)           |
| $\alpha/^\circ$     | 90                  |
| $\beta/^\circ$      | 90                  |
| $\gamma/^\circ$     | 90                  |

|                                             |                                                               |
|---------------------------------------------|---------------------------------------------------------------|
| Volume/Å <sup>3</sup>                       | 2641.2(4)                                                     |
| Z                                           | 4                                                             |
| ρ <sub>calc</sub> /cm <sup>3</sup>          | 1.271                                                         |
| μ/mm <sup>-1</sup>                          | 0.157                                                         |
| F(000)                                      | 1064.0                                                        |
| Crystal size/mm <sup>3</sup>                | 0.41 × 0.12 × 0.11                                            |
| Radiation                                   | MoKα (λ = 0.71073)                                            |
| 2θ range for data collection/°              | 4.032 to 54.916                                               |
| Index ranges                                | -10 ≤ h ≤ 10, -13 ≤ k ≤ 13, -40 ≤ l ≤ 34                      |
| Reflections collected                       | 23184                                                         |
| Independent reflections                     | 6027 [R <sub>int</sub> = 0.0697, R <sub>sigma</sub> = 0.0658] |
| Data/restraints/parameters                  | 6027/0/335                                                    |
| Goodness-of-fit on F <sup>2</sup>           | 1.023                                                         |
| Final R indexes [I ≥ 2σ (I)]                | R <sub>1</sub> = 0.0493, wR <sub>2</sub> = 0.0937             |
| Final R indexes [all data]                  | R <sub>1</sub> = 0.1072, wR <sub>2</sub> = 0.1168             |
| Largest diff. peak/hole / e Å <sup>-3</sup> | 0.32/-0.23                                                    |
| Flack parameter                             | -0.05(6)                                                      |

**Procedure for the recrystallization of racemic 17:** To a 10 mL tube containing **17** (15 mg) were added *n*-hexane (1.5 mL) and *i*-PrOH (2.5 mL). The mixture was heated until a clear solution was formed, which was kept aside at room temperature to obtain crystals. The crystals were subjected for single crystal XRD to determine the relative configuration of **17**. The data were collected by an Agilent Gemini equipped with a Cu radiation source (Kα = 1.54184 Å) at 294.93 K. CCDC 2050823 (**17**) contains the supplementary crystallographic data for this paper. These data can be obtained free of charge via [www.ccdc.cam.ac.uk/data\\_request/cif](http://www.ccdc.cam.ac.uk/data_request/cif).

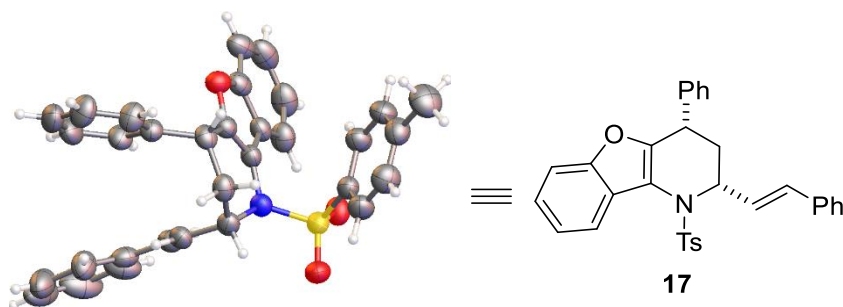

(ellipsoid contour probability 50%)

Identification code **17**

|                                             |                                                               |
|---------------------------------------------|---------------------------------------------------------------|
| Empirical formula                           | C <sub>32</sub> H <sub>27</sub> NO <sub>3</sub> S             |
| Formula weight                              | 505.60                                                        |
| Temperature/K                               | 294.93(10)                                                    |
| Crystal system                              | monoclinic                                                    |
| Space group                                 | P2 <sub>1</sub> /n                                            |
| a/Å                                         | 13.2549(3)                                                    |
| b/Å                                         | 11.5853(4)                                                    |
| c/Å                                         | 17.1735(4)                                                    |
| α/°                                         | 90                                                            |
| β/°                                         | 97.293(2)                                                     |
| γ/°                                         | 90                                                            |
| Volume/Å <sup>3</sup>                       | 2615.86(12)                                                   |
| Z                                           | 4                                                             |
| ρ <sub>calc</sub> /cm <sup>3</sup>          | 1.284                                                         |
| μ/mm <sup>-1</sup>                          | 1.368                                                         |
| F(000)                                      | 1064.0                                                        |
| Crystal size/mm <sup>3</sup>                | 0.5 × 0.4 × 0.3                                               |
| Radiation                                   | CuKα (λ = 1.54184)                                            |
| 2θ range for data collection/°              | 7.956 to 143.642                                              |
| Index ranges                                | -16 ≤ h ≤ 16, -12 ≤ k ≤ 14, -15 ≤ l ≤ 21                      |
| Reflections collected                       | 14291                                                         |
| Independent reflections                     | 5019 [R <sub>int</sub> = 0.0407, R <sub>sigma</sub> = 0.0332] |
| Data/restraints/parameters                  | 5019/0/335                                                    |
| Goodness-of-fit on F <sup>2</sup>           | 1.033                                                         |
| Final R indexes [I ≥ 2σ (I)]                | R <sub>1</sub> = 0.0607, wR <sub>2</sub> = 0.1639             |
| Final R indexes [all data]                  | R <sub>1</sub> = 0.0687, wR <sub>2</sub> = 0.1763             |
| Largest diff. peak/hole / e Å <sup>-3</sup> | 0.26/-0.45                                                    |

**Procedure for the recrystallization of chiral 21:** To a 10 mL tube containing **21** (15 mg) were added *n*-hexane (1.5 mL) and THF (2.5 mL). The mixture was heated until a clear solution was formed, which was kept aside at room temperature to obtain crystals. The crystals were subjected for single crystal XRD to determine the absolute configuration of **21**. The data were collected by a Bruker APEX-II CCD equipped with a Mo radiation source (Kα = 0.71073 Å) at 273.15 K. CCDC 2219805

(21) contains the supplementary crystallographic data for this paper. These data can be obtained free of charge via [www.ccdc.cam.ac.uk/data\\_request/cif](http://www.ccdc.cam.ac.uk/data_request/cif).

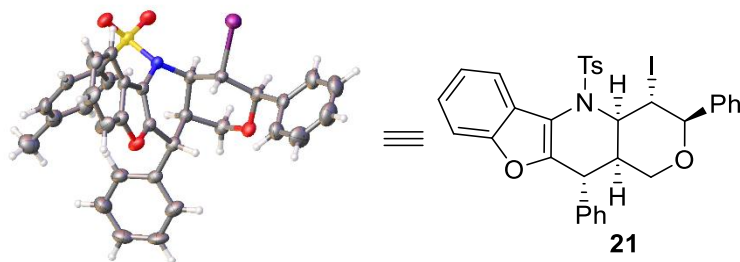

(ellipsoid contour probability 50%)

|                                               |                                                               |
|-----------------------------------------------|---------------------------------------------------------------|
| Identification code                           | <b>21</b>                                                     |
| Empirical formula                             | $C_{33}H_{28}INO_4S$                                          |
| Formula weight                                | 661.52                                                        |
| Temperature/K                                 | 161.0                                                         |
| Crystal system                                | orthorhombic                                                  |
| Space group                                   | $P2_12_12_1$                                                  |
| $a/\text{\AA}$                                | 11.0840(12)                                                   |
| $b/\text{\AA}$                                | 11.2741(10)                                                   |
| $c/\text{\AA}$                                | 27.234(3)                                                     |
| $\alpha/^\circ$                               | 90                                                            |
| $\beta/^\circ$                                | 90                                                            |
| $\gamma/^\circ$                               | 90                                                            |
| Volume/ $\text{\AA}^3$                        | 3403.2(6)                                                     |
| Z                                             | 4                                                             |
| $\rho_{\text{calc}}/\text{cm}^3$              | 1.291                                                         |
| $\mu/\text{mm}^{-1}$                          | 1.035                                                         |
| F(000)                                        | 1336.0                                                        |
| Crystal size/ $\text{mm}^3$                   | $0.35 \times 0.22 \times 0.09$                                |
| Radiation                                     | MoK $\alpha$ ( $\lambda = 0.71073$ )                          |
| $2\theta$ range for data collection/ $^\circ$ | 4.738 to 55.044                                               |
| Index ranges                                  | $-14 \leq h \leq 14, -13 \leq k \leq 14, -35 \leq l \leq 35$  |
| Reflections collected                         | 51913                                                         |
| Independent reflections                       | 7778 [ $R_{\text{int}} = 0.0814, R_{\text{sigma}} = 0.0497$ ] |
| Data/restraints/parameters                    | 7778/0/362                                                    |

|                                                |                                  |
|------------------------------------------------|----------------------------------|
| Goodness-of-fit on $F^2$                       | 1.020                            |
| Final R indexes [ $I \geq 2\sigma(I)$ ]        | $R_1 = 0.0286$ , $wR_2 = 0.0596$ |
| Final R indexes [all data]                     | $R_1 = 0.0420$ , $wR_2 = 0.0633$ |
| Largest diff. peak/hole / $e \text{ \AA}^{-3}$ | 0.31/-0.45                       |
| Flack parameter                                | 0.001(10)                        |

**Procedure for the recrystallization of racemic 25:** To a 10 mL tube containing **25** (15 mg) were added *n*-hexane (1.5 mL) and *i*-PrOH (2.5 mL). The mixture was heated until a clear solution was formed, which was kept aside at room temperature to obtain crystals. The crystals were subjected for single crystal XRD to determine the relative configuration of **25**. The data were collected by a Bruker APEX-II CCD equipped with a Mo radiation source ( $K\alpha = 0.71073 \text{ \AA}$ ) at 273.15 K. CCDC 2219806 (**25**) contains the supplementary crystallographic data for this paper. These data can be obtained free of charge via [www.ccdc.cam.ac.uk/data\\_request/cif](http://www.ccdc.cam.ac.uk/data_request/cif).

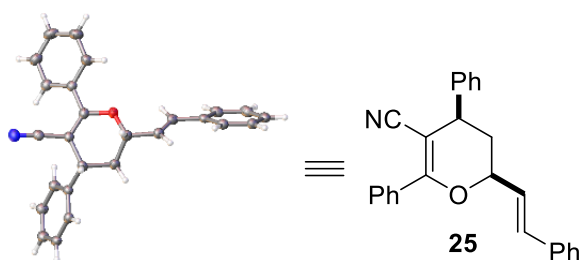

(ellipsoid contour probability 50%)

|                        |                  |
|------------------------|------------------|
| Identification code    | <b>25</b>        |
| Empirical formula      | $C_{26}H_{21}NO$ |
| Formula weight         | 363.44           |
| Temperature/K          | 149.0            |
| Crystal system         | monoclinic       |
| Space group            | $P2_1/n$         |
| $a/\text{\AA}$         | 10.7659(11)      |
| $b/\text{\AA}$         | 13.1580(15)      |
| $c/\text{\AA}$         | 27.887(3)        |
| $\alpha/^\circ$        | 90               |
| $\beta/^\circ$         | 100.454(4)       |
| $\gamma/^\circ$        | 90               |
| Volume/ $\text{\AA}^3$ | 3884.8(7)        |



|                                                |                                                               |
|------------------------------------------------|---------------------------------------------------------------|
| Z                                              | 8                                                             |
| $\rho_{\text{calc}}/\text{cm}^3$               | 1.243                                                         |
| $\mu/\text{mm}^{-1}$                           | 0.075                                                         |
| F(000)                                         | 1536.0                                                        |
| Crystal size/ $\text{mm}^3$                    | $0.45 \times 0.13 \times 0.04$                                |
| Radiation                                      | MoK $\alpha$ ( $\lambda = 0.71073$ )                          |
| 2 $\theta$ range for data collection/ $^\circ$ | 4.29 to 55.022                                                |
| Index ranges                                   | $-13 \leq h \leq 13, -17 \leq k \leq 17, -36 \leq l \leq 33$  |
| Reflections collected                          | 36992                                                         |
| Independent reflections                        | 8881 [ $R_{\text{int}} = 0.1161, R_{\text{sigma}} = 0.1068$ ] |
| Data/restraints/parameters                     | 8881/0/505                                                    |
| Goodness-of-fit on $F^2$                       | 1.021                                                         |
| Final R indexes [ $I \geq 2\sigma(I)$ ]        | $R_1 = 0.0681, wR_2 = 0.1649$                                 |
| Final R indexes [all data]                     | $R_1 = 0.1112, wR_2 = 0.1963$                                 |
| Largest diff. peak/hole / $e \text{ \AA}^{-3}$ | 0.37/-0.32                                                    |

## 8. NMR, HRMS spectra and HPLC chromatograms

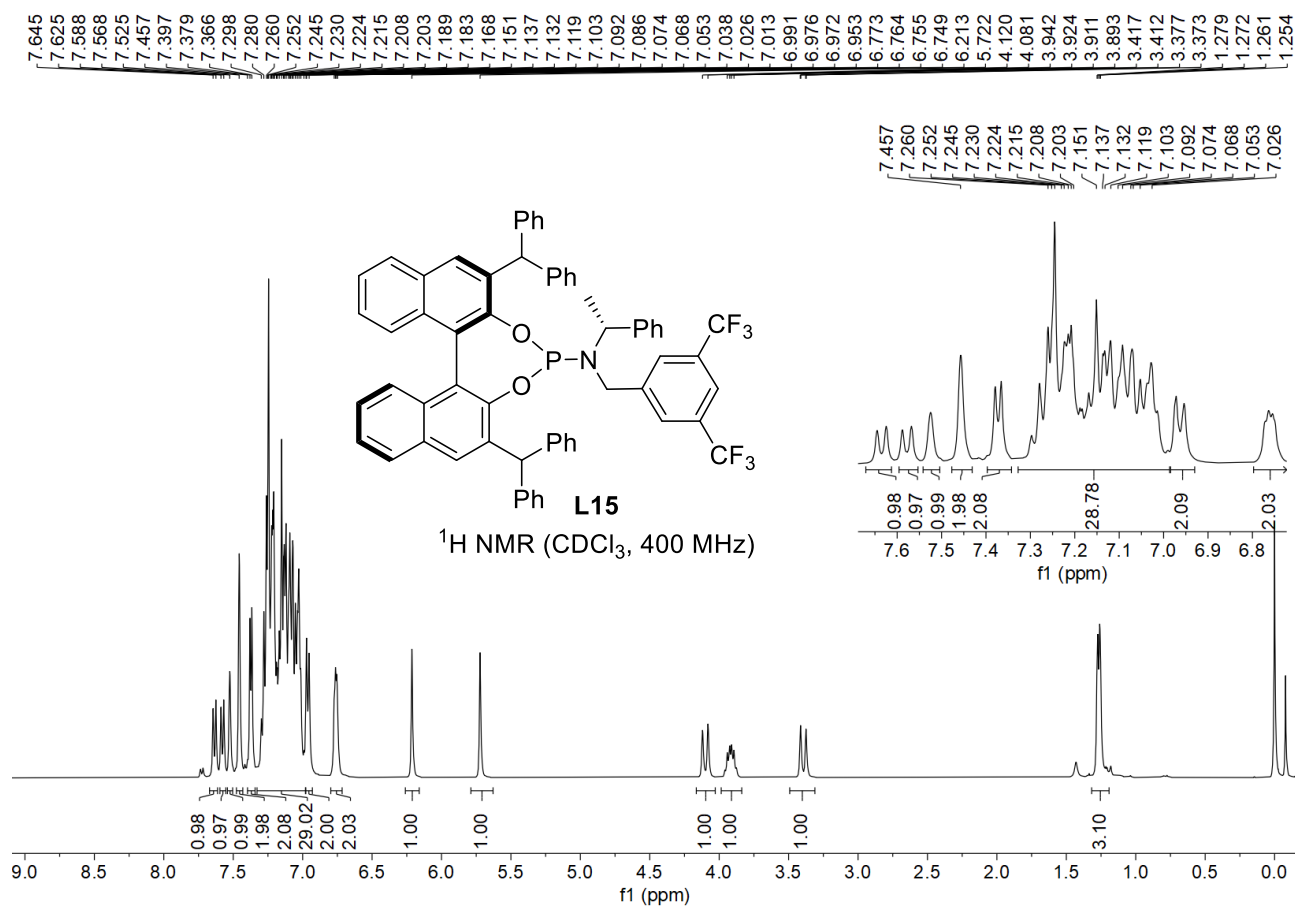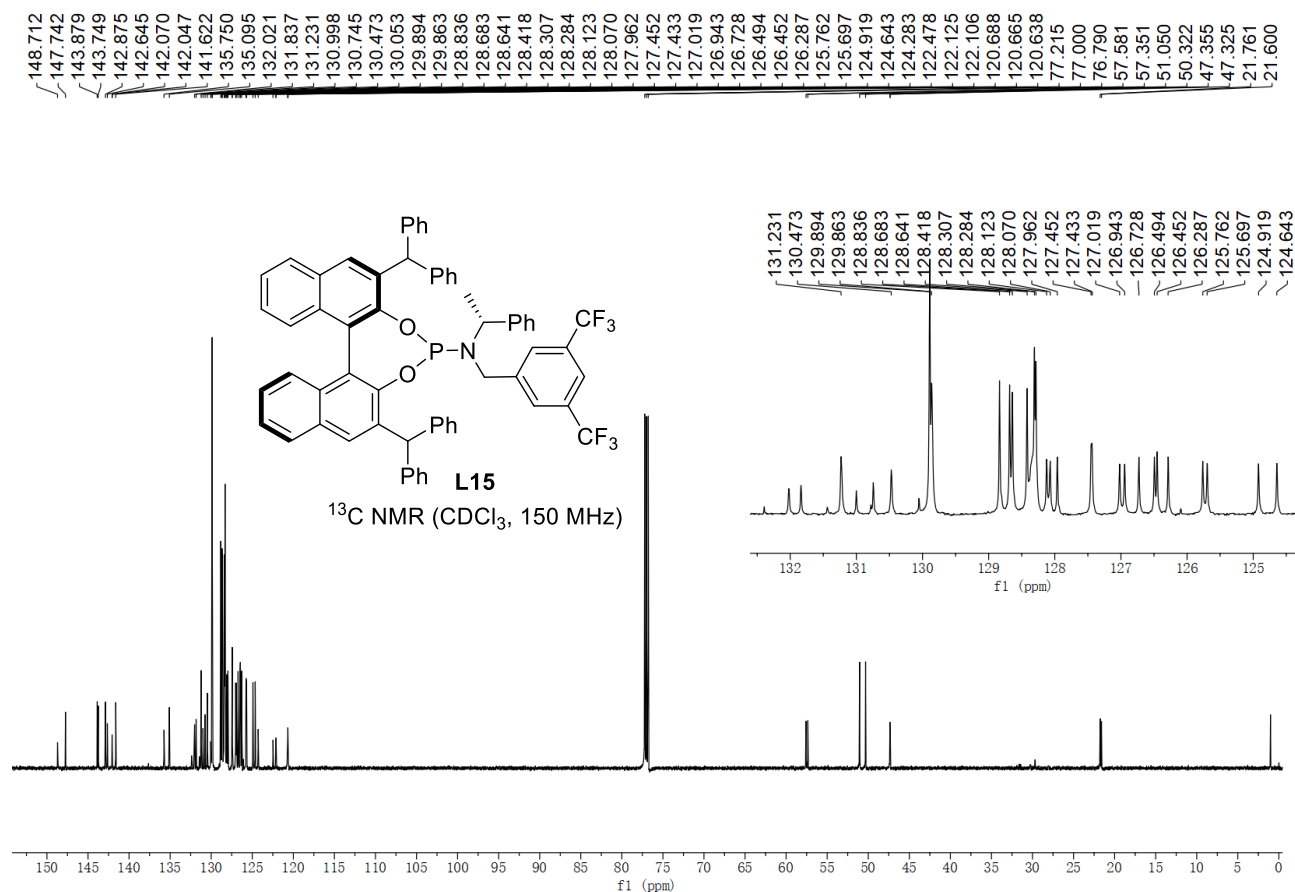

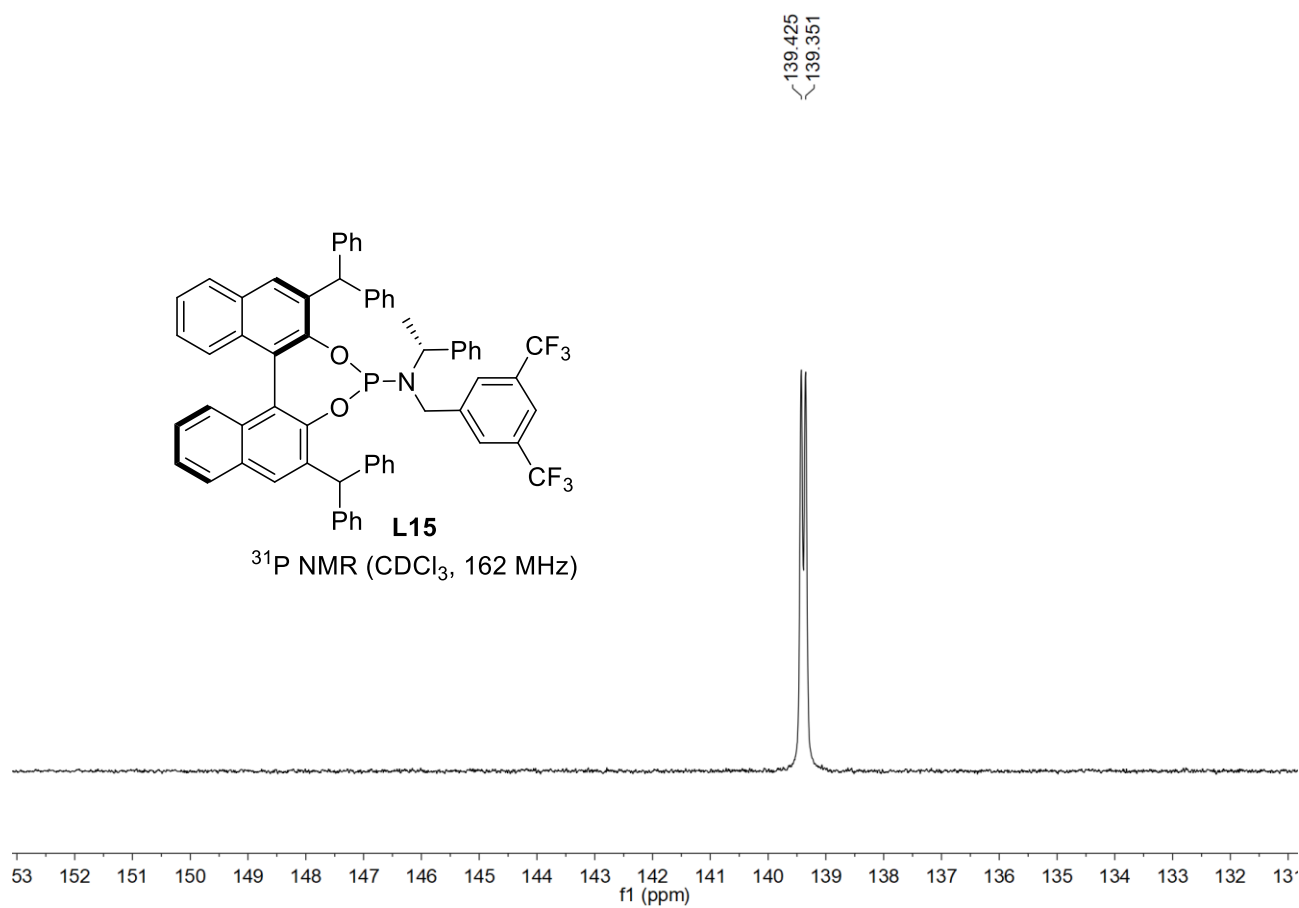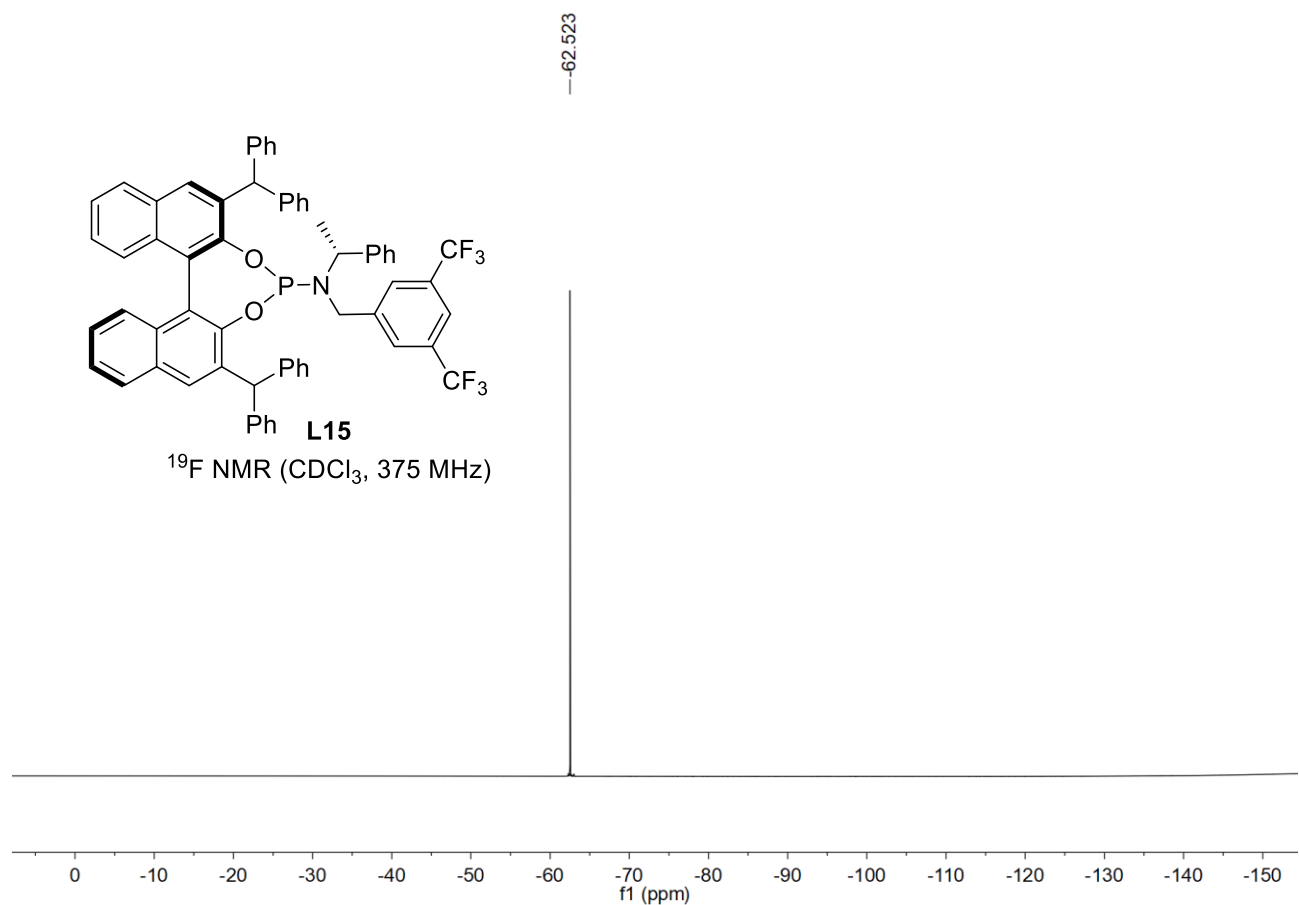

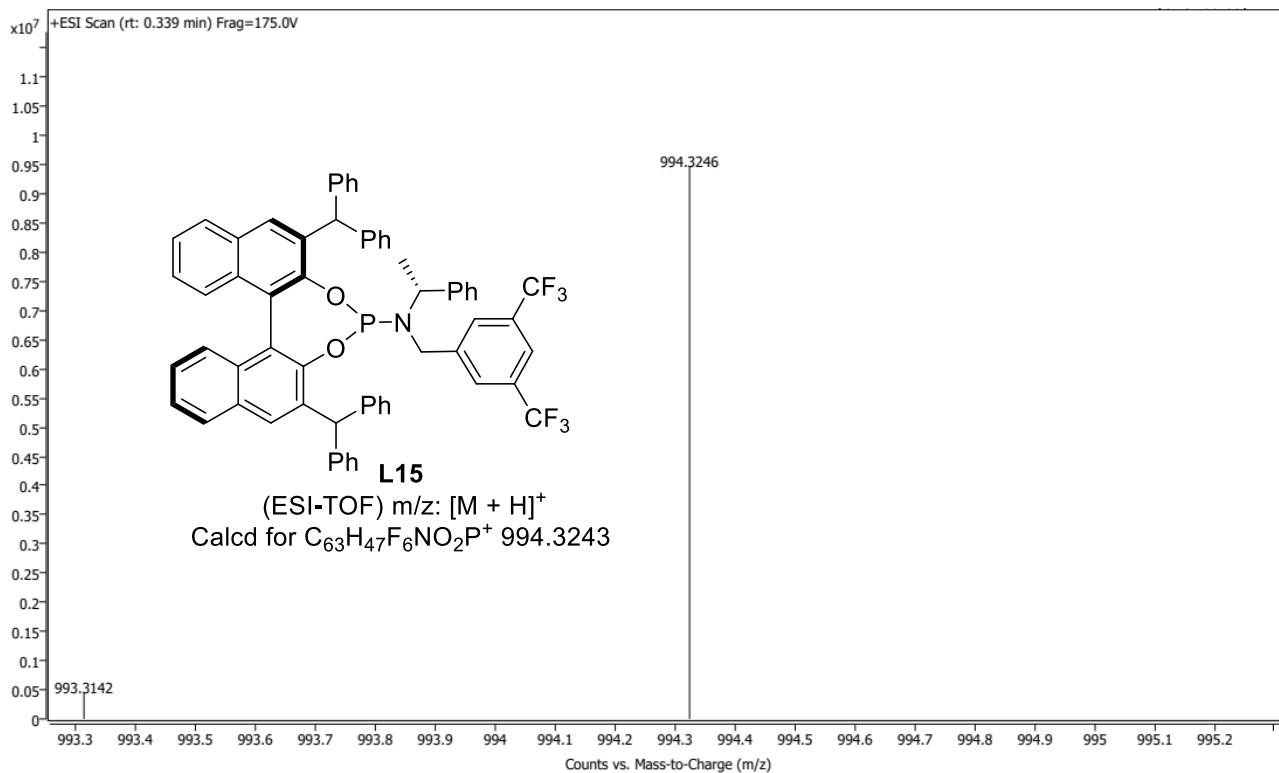

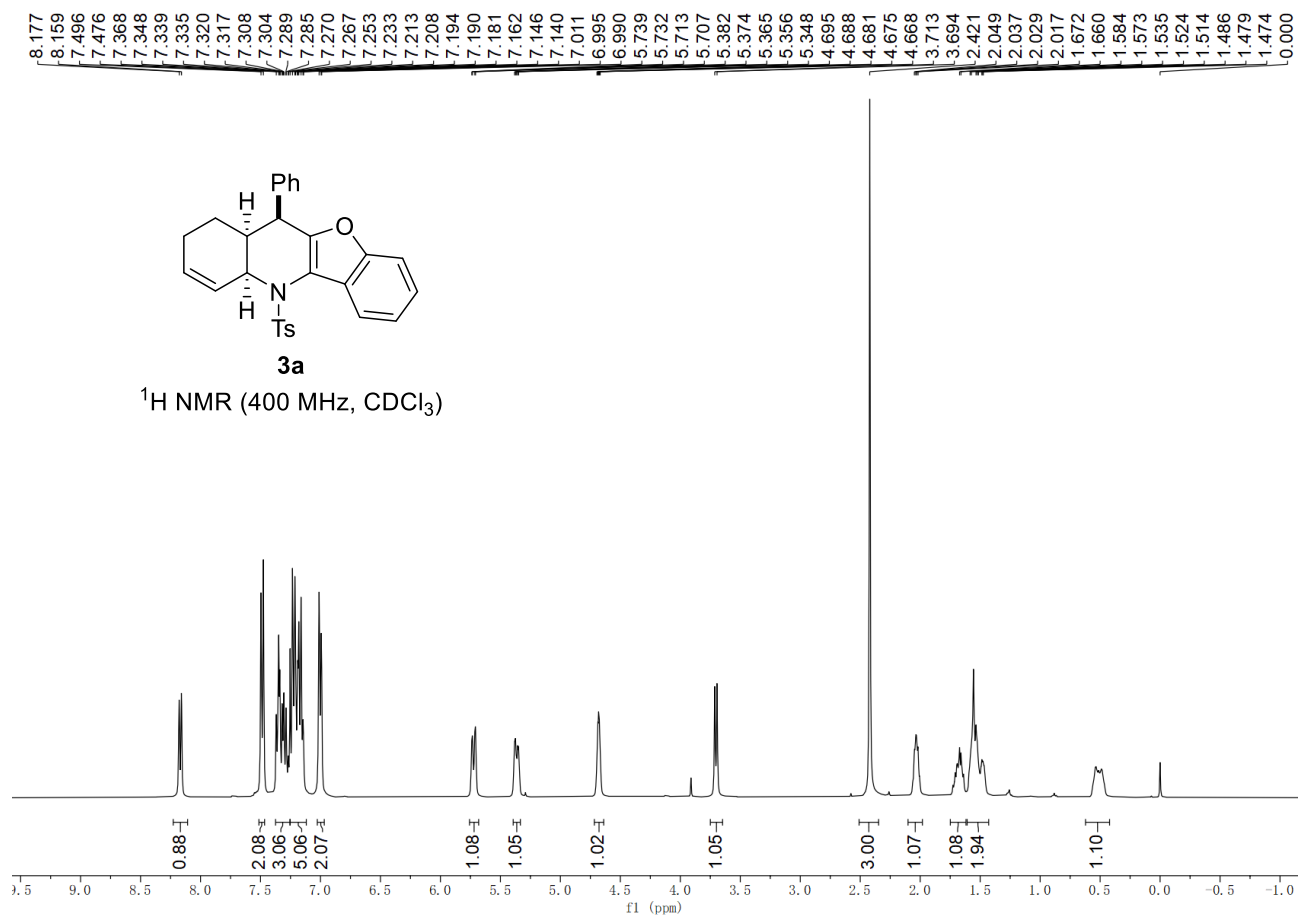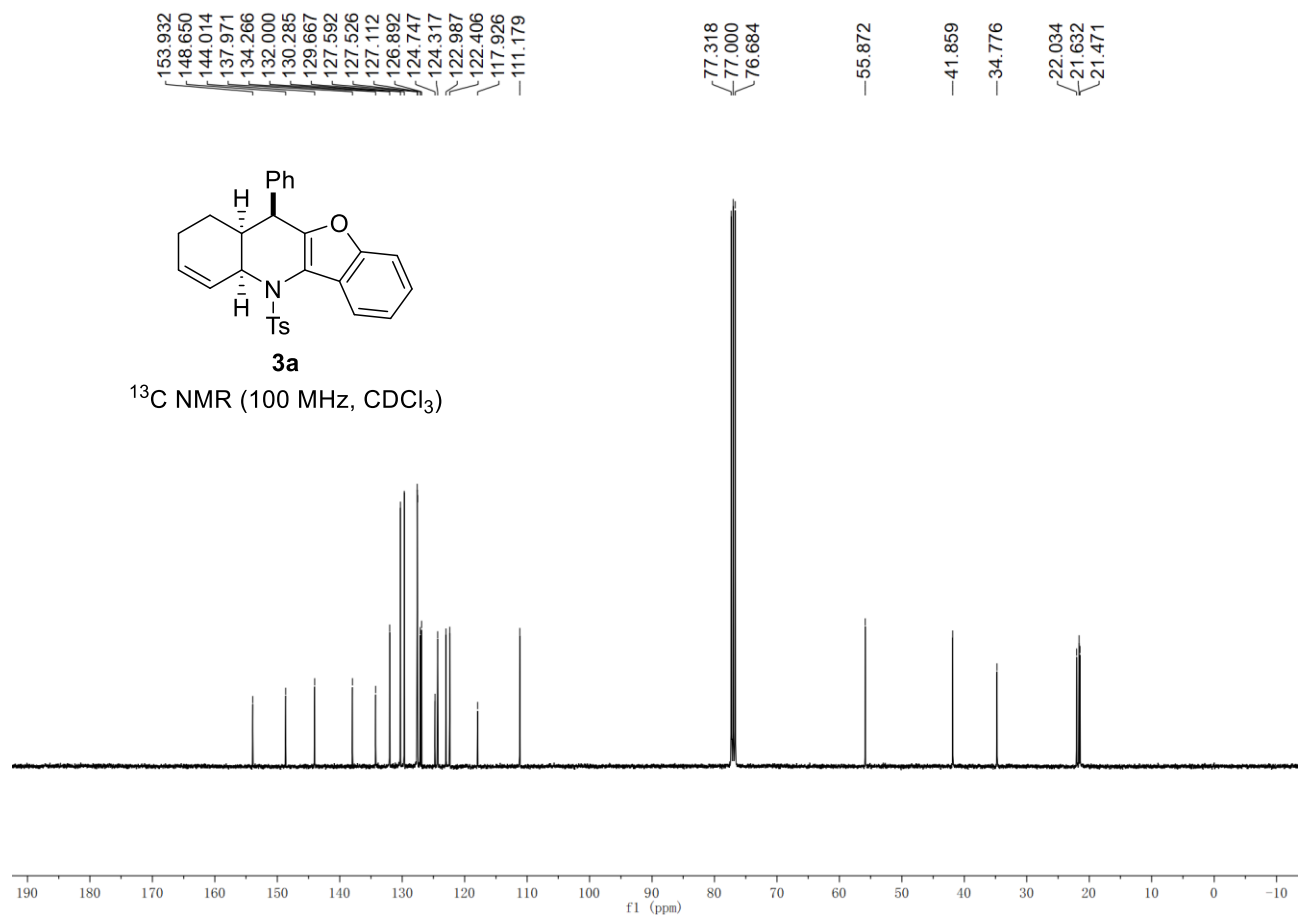

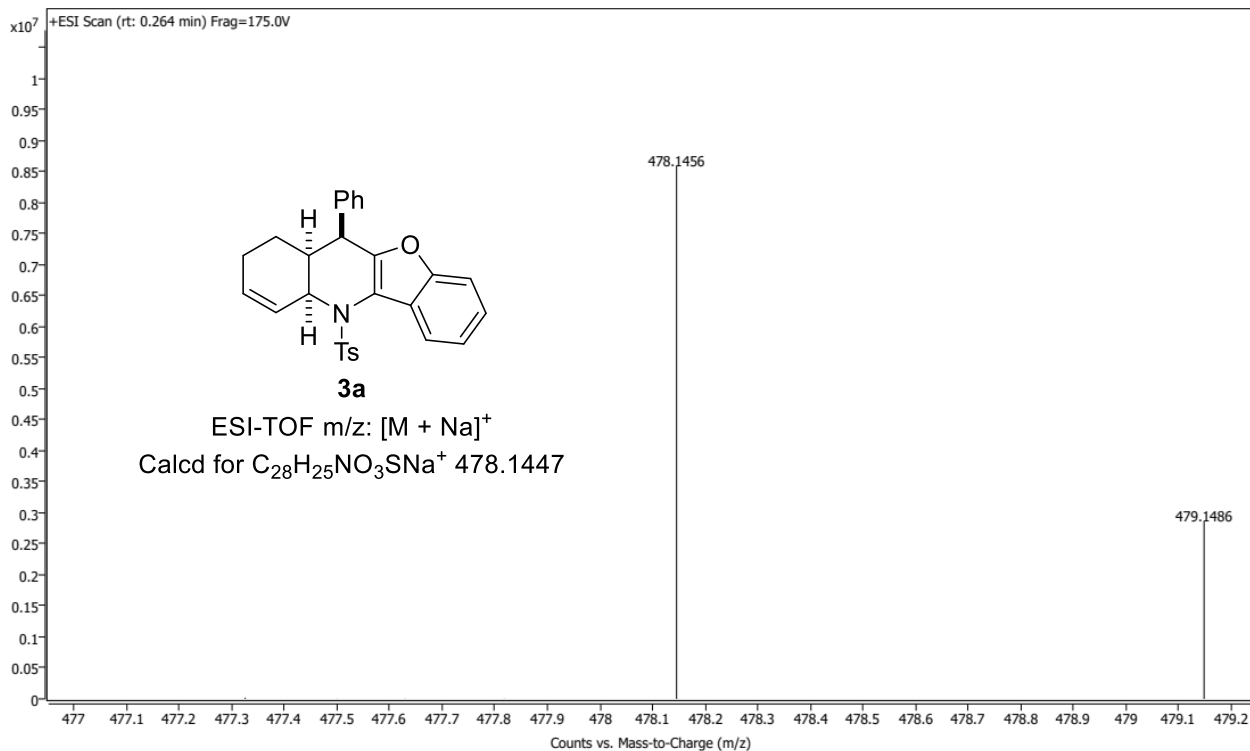

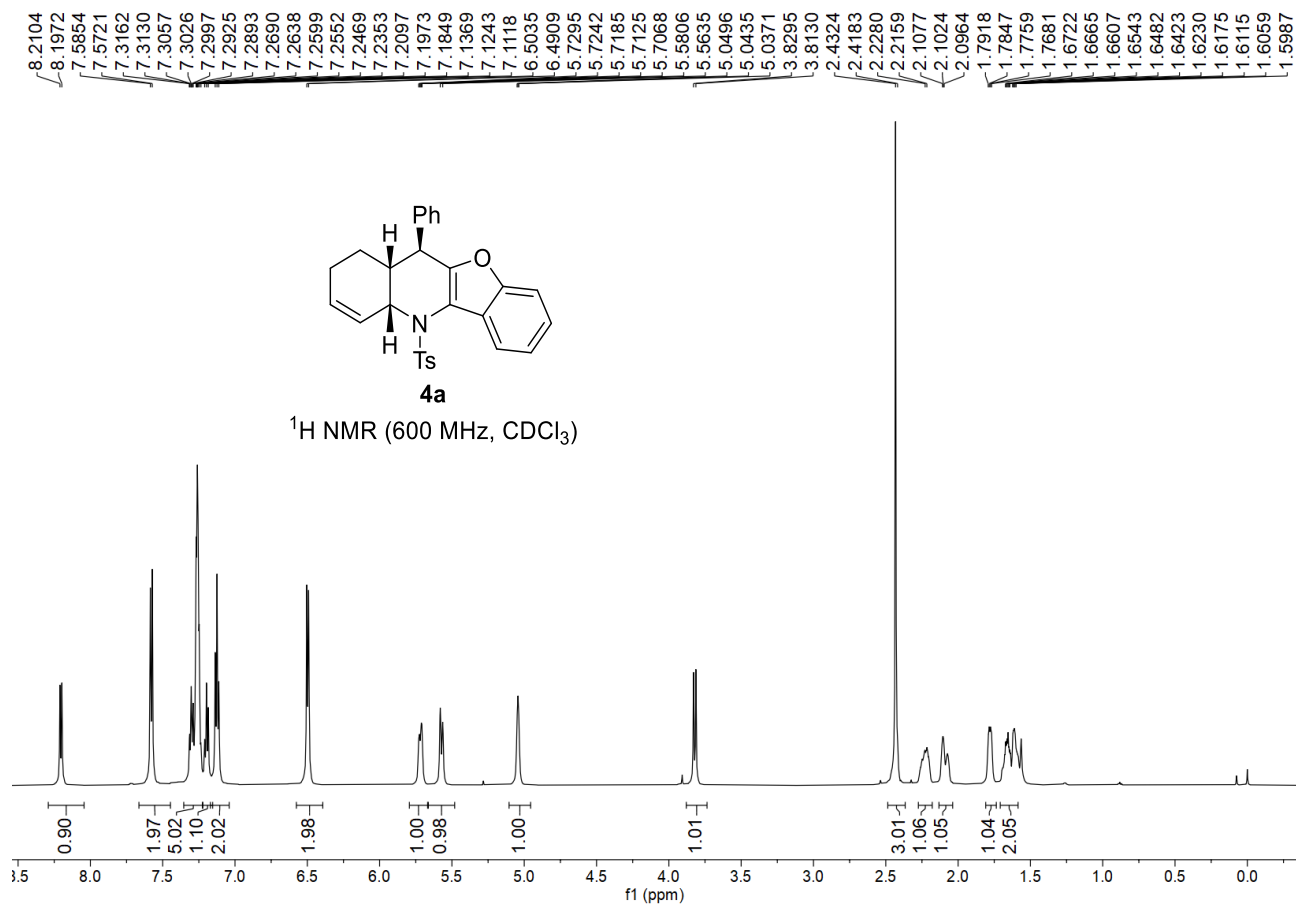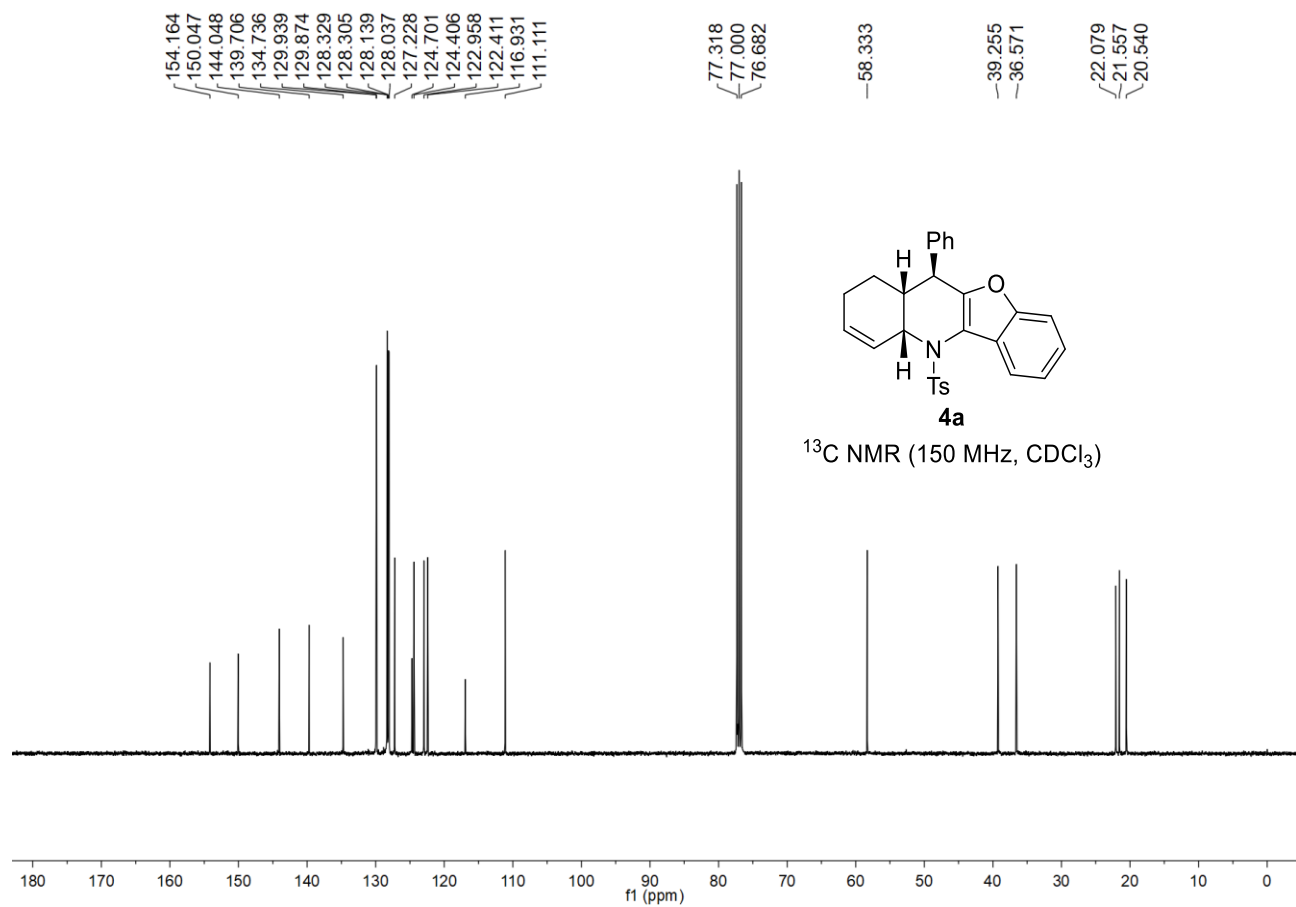

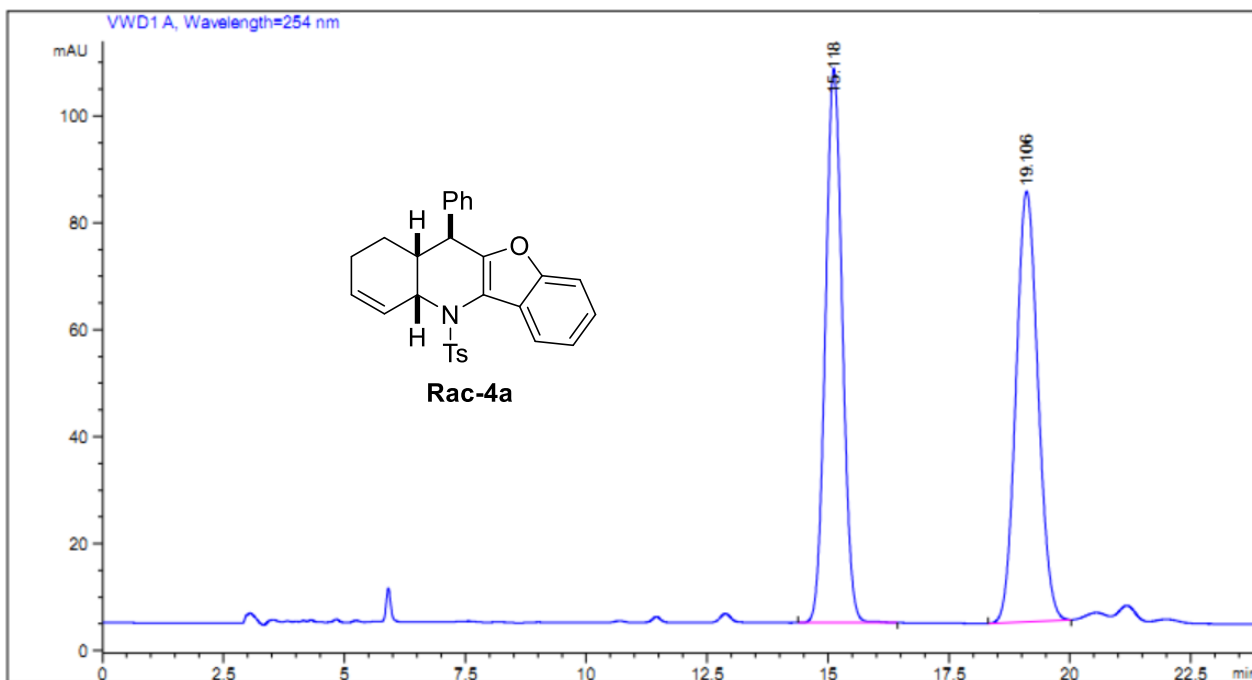

| # | [min]  | [min] | [mAU*s] | [mAU]      | %         |         |
|---|--------|-------|---------|------------|-----------|---------|
| 1 | 15.118 | BB    | 0.3786  | 2521.94507 | 103.63020 | 49.7283 |
| 2 | 19.106 | BB    | 0.4916  | 2549.49829 | 80.53268  | 50.2717 |

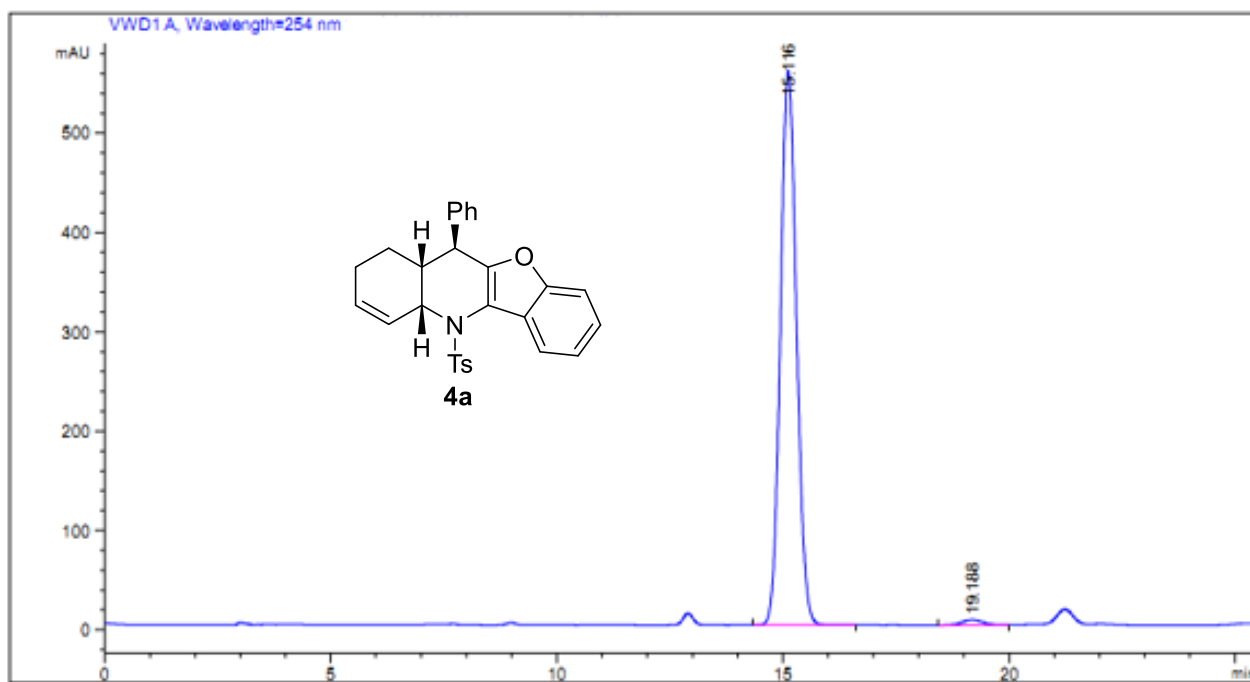

| # | [min]  | [min] | [mAU*s] | [mAU]     | %         |         |
|---|--------|-------|---------|-----------|-----------|---------|
| 1 | 15.116 | BB    | 0.3858  | 1.37939e4 | 558.28955 | 98.7704 |
| 2 | 19.188 | BB    | 0.5049  | 171.71707 | 5.35892   | 1.2296  |



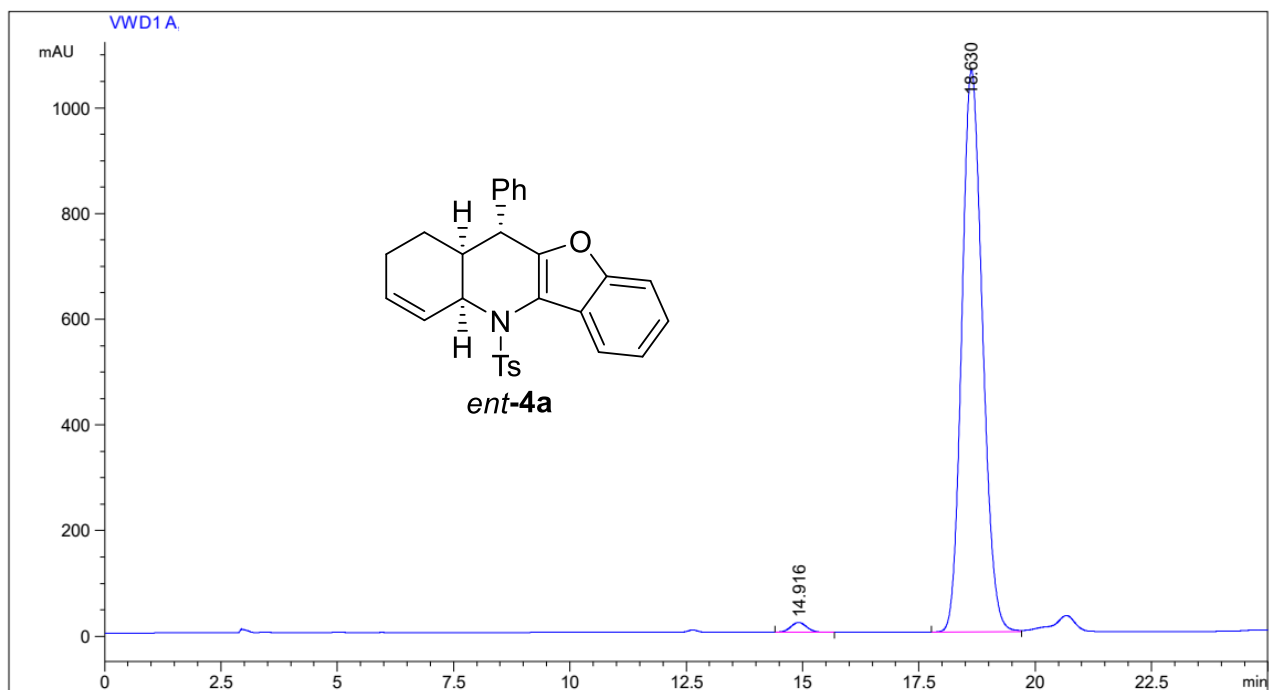

| # | [min]  | [min] | mAU    | *s        | [mAU]      | %       |
|---|--------|-------|--------|-----------|------------|---------|
| 1 | 14.916 | VB    | 0.3736 | 448.99615 | 18.68349   | 1.3493  |
| 2 | 18.630 | BV    | 0.4810 | 3.28265e4 | 1063.50916 | 98.6507 |

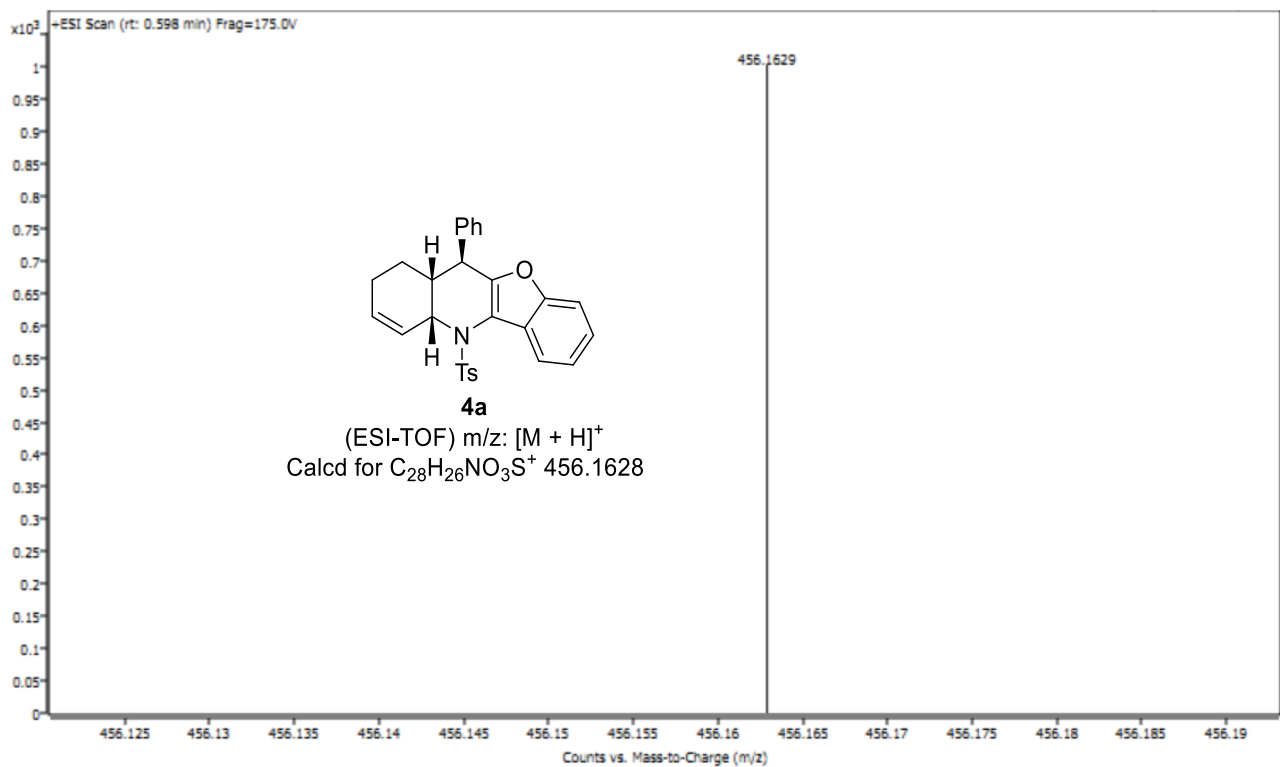

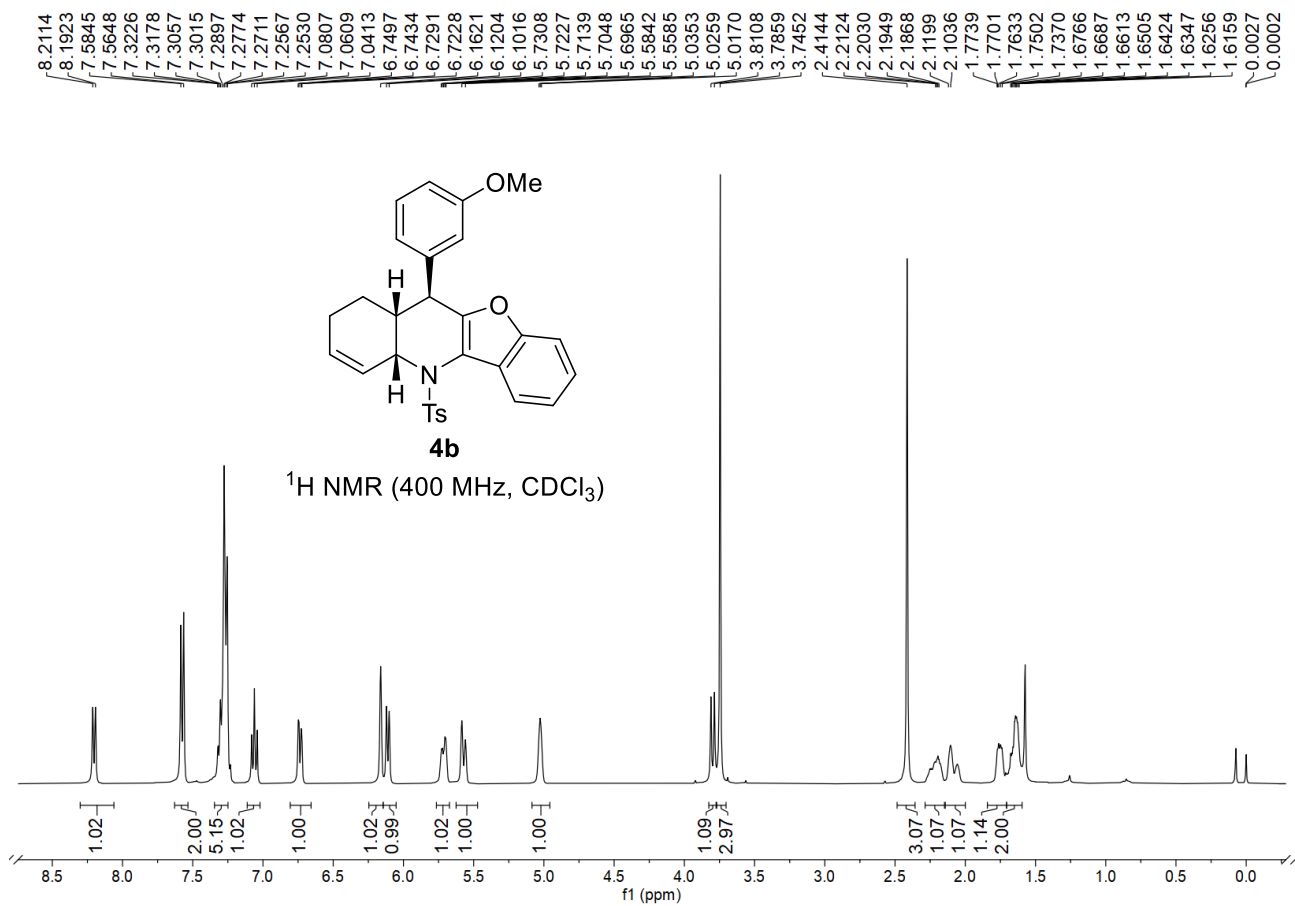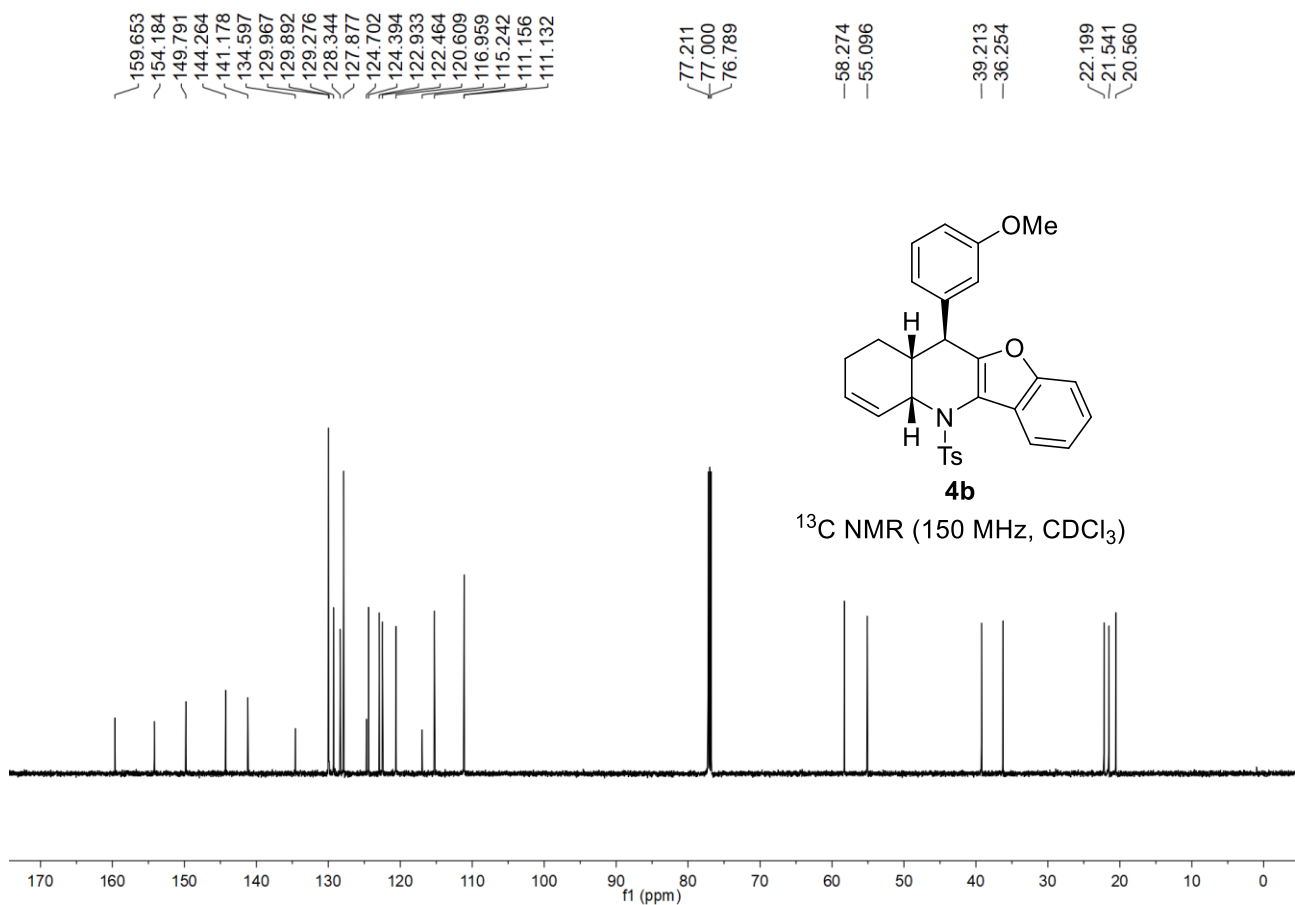

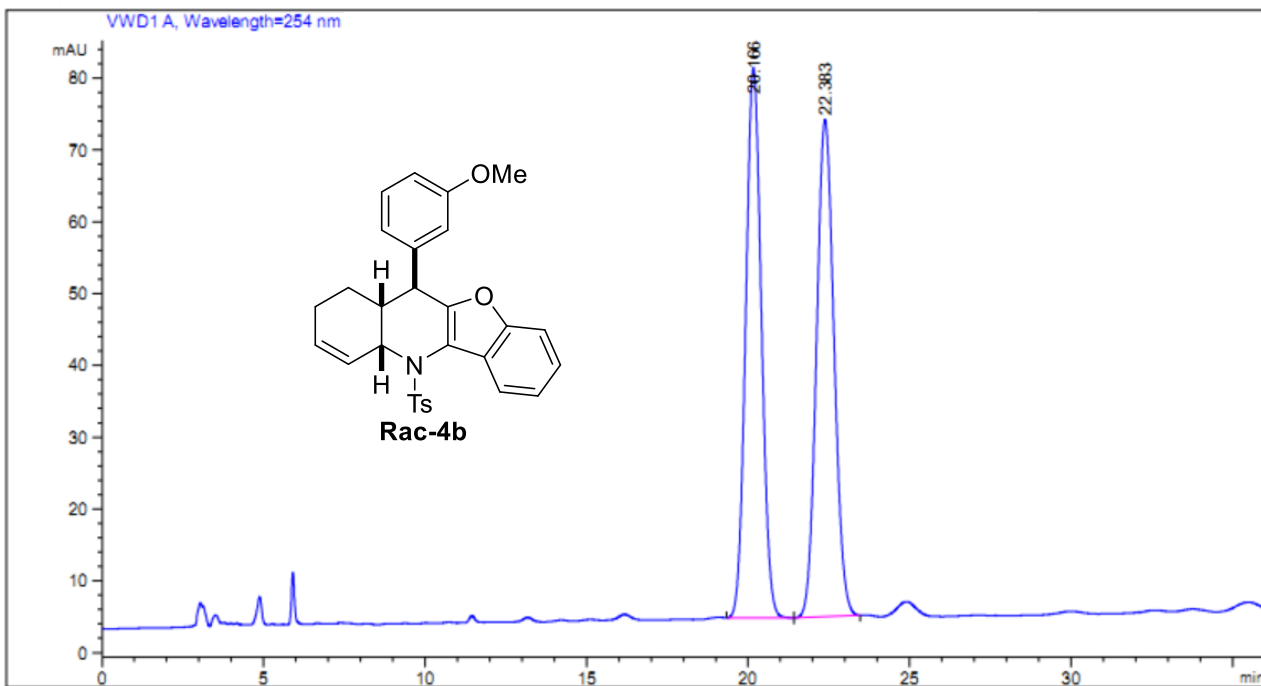

| # | [min]  | [min] | [min]  | [mAU*s]    | [mAU]    | %       |
|---|--------|-------|--------|------------|----------|---------|
| 1 | 20.166 | BB    | 0.5234 | 2574.43481 | 76.55724 | 49.6797 |
| 2 | 22.383 | BB    | 0.5908 | 2607.63110 | 69.23320 | 50.3203 |

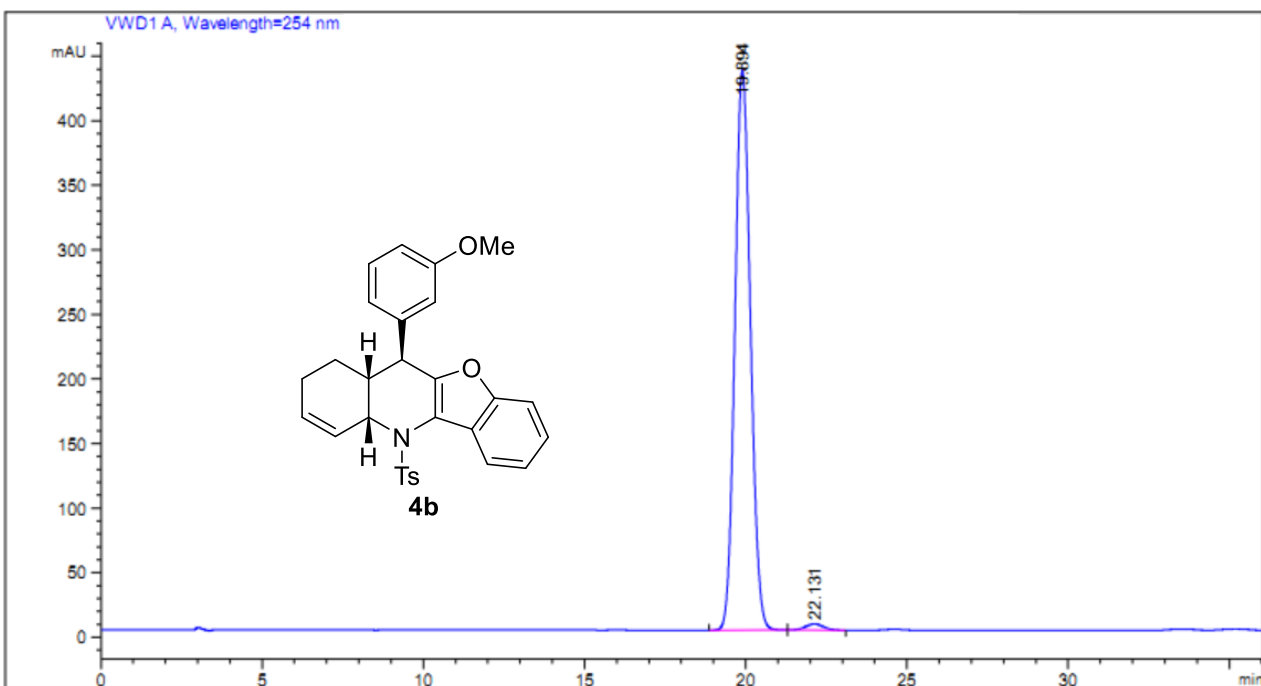

| # | [min]  | [min] | [min]  | [mAU*s]   | [mAU]     | %       |
|---|--------|-------|--------|-----------|-----------|---------|
| 1 | 19.894 | BB    | 0.5217 | 1.45212e4 | 433.71042 | 98.7962 |
| 2 | 22.131 | BB    | 0.5673 | 176.94371 | 4.73173   | 1.2038  |

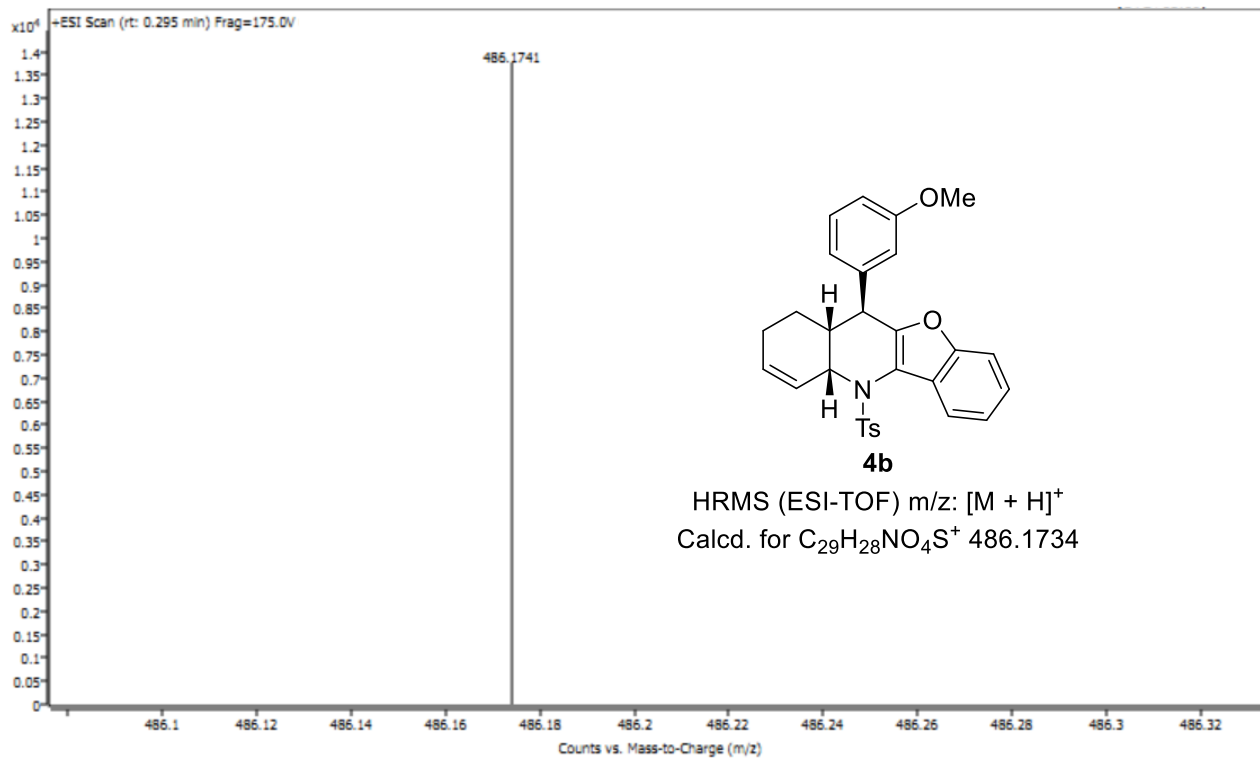

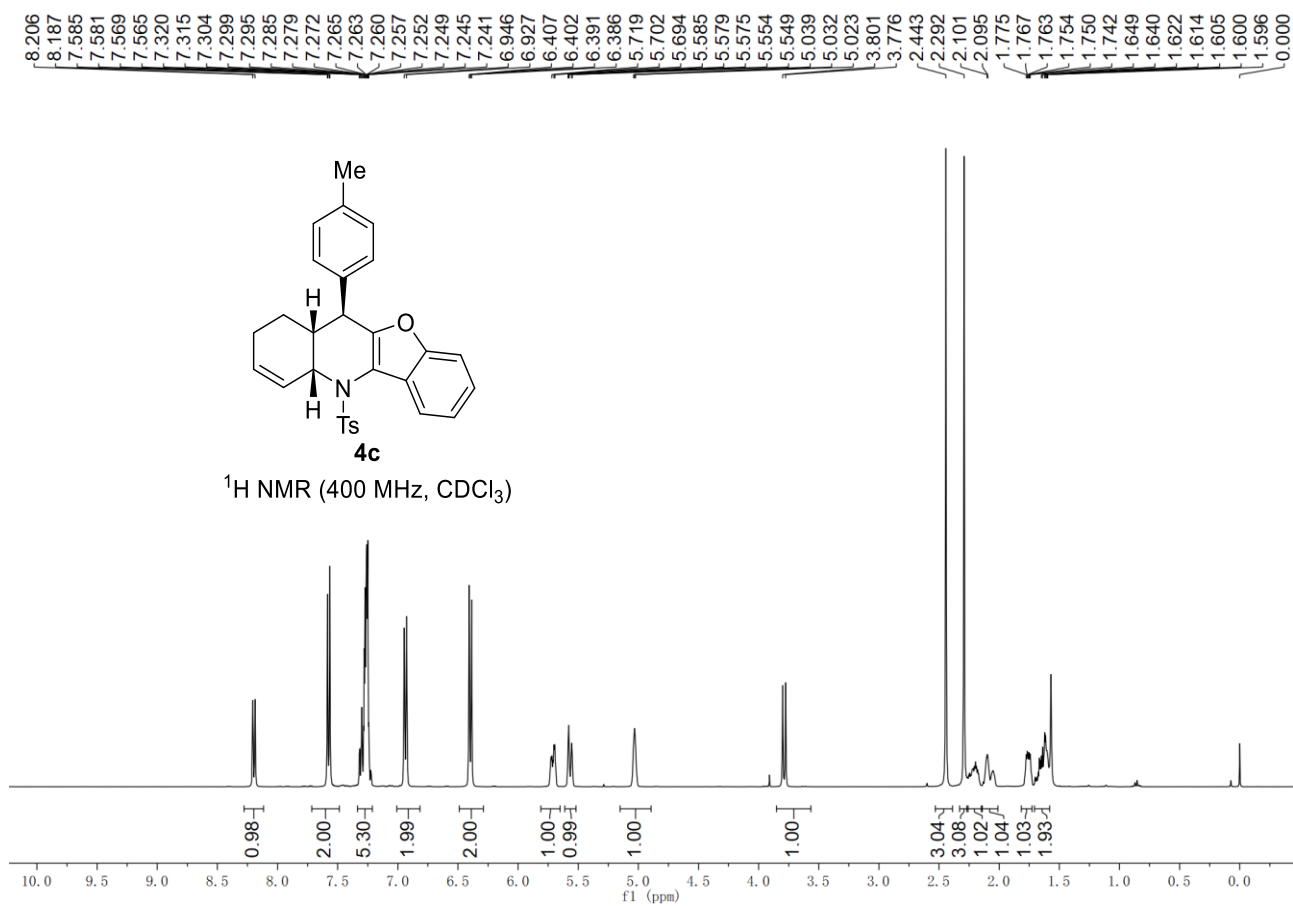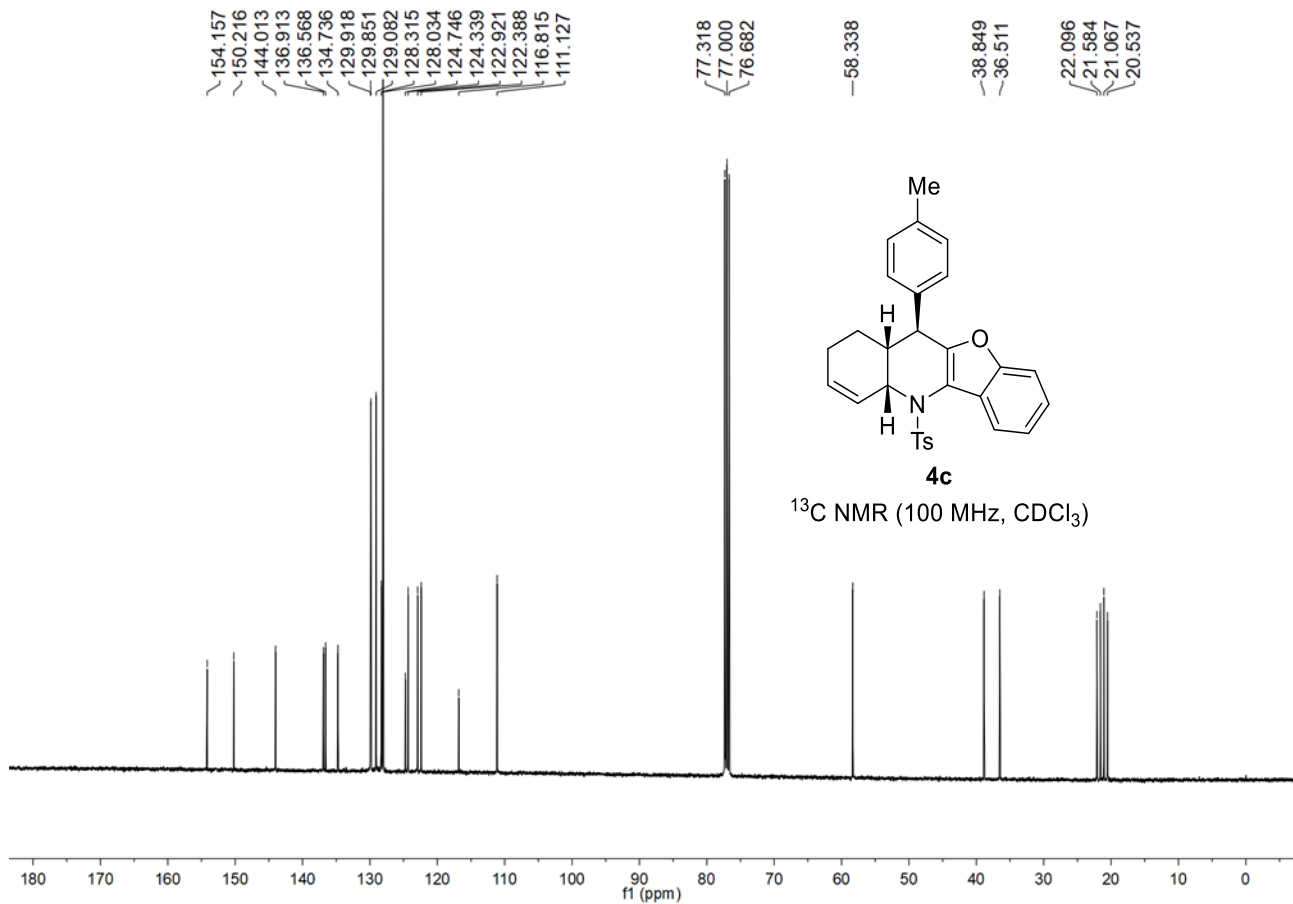

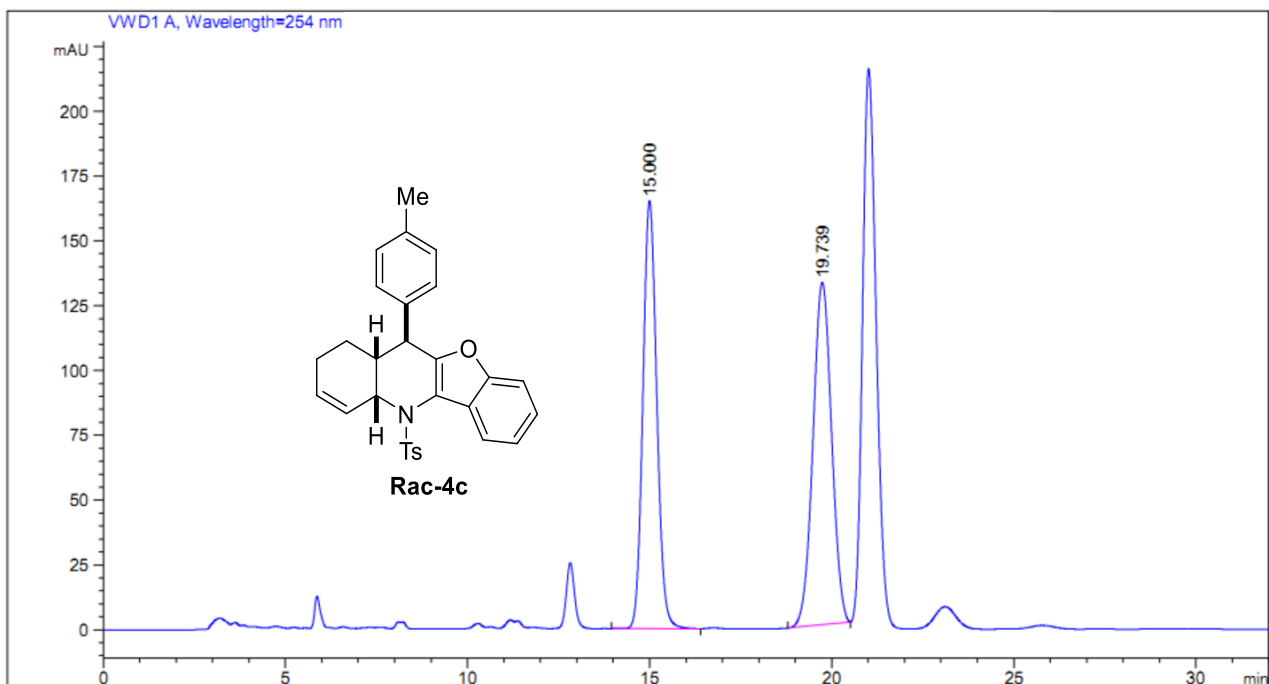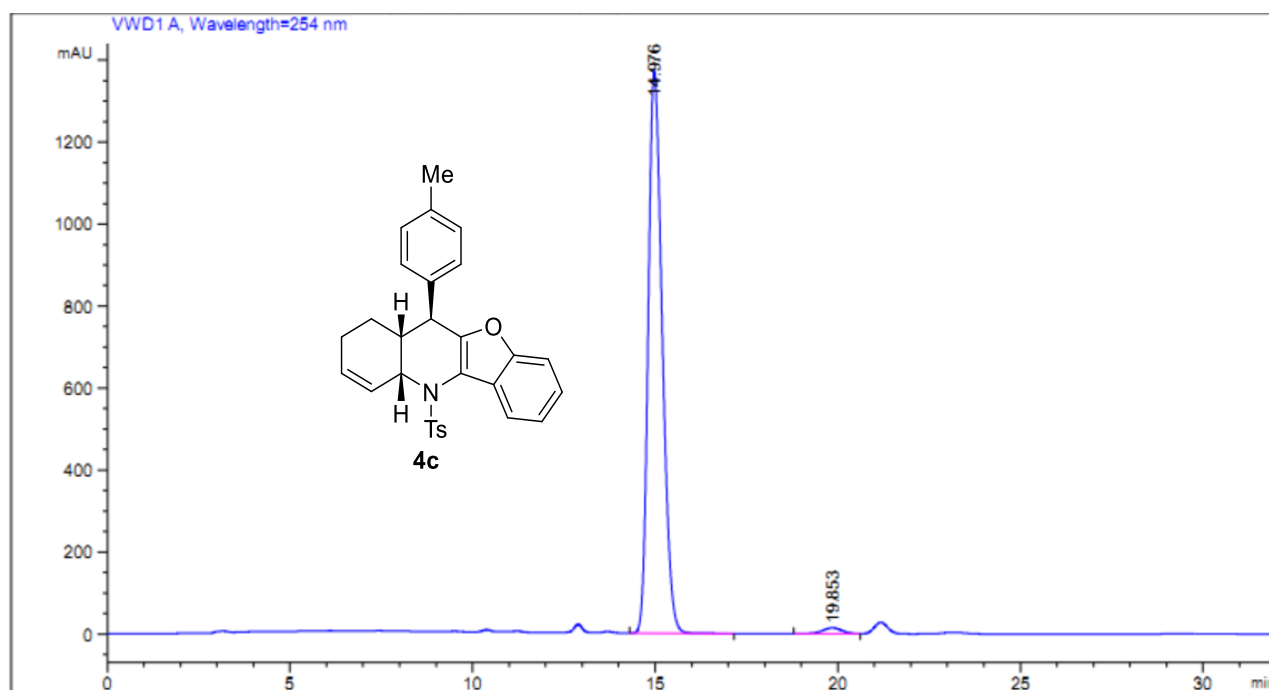

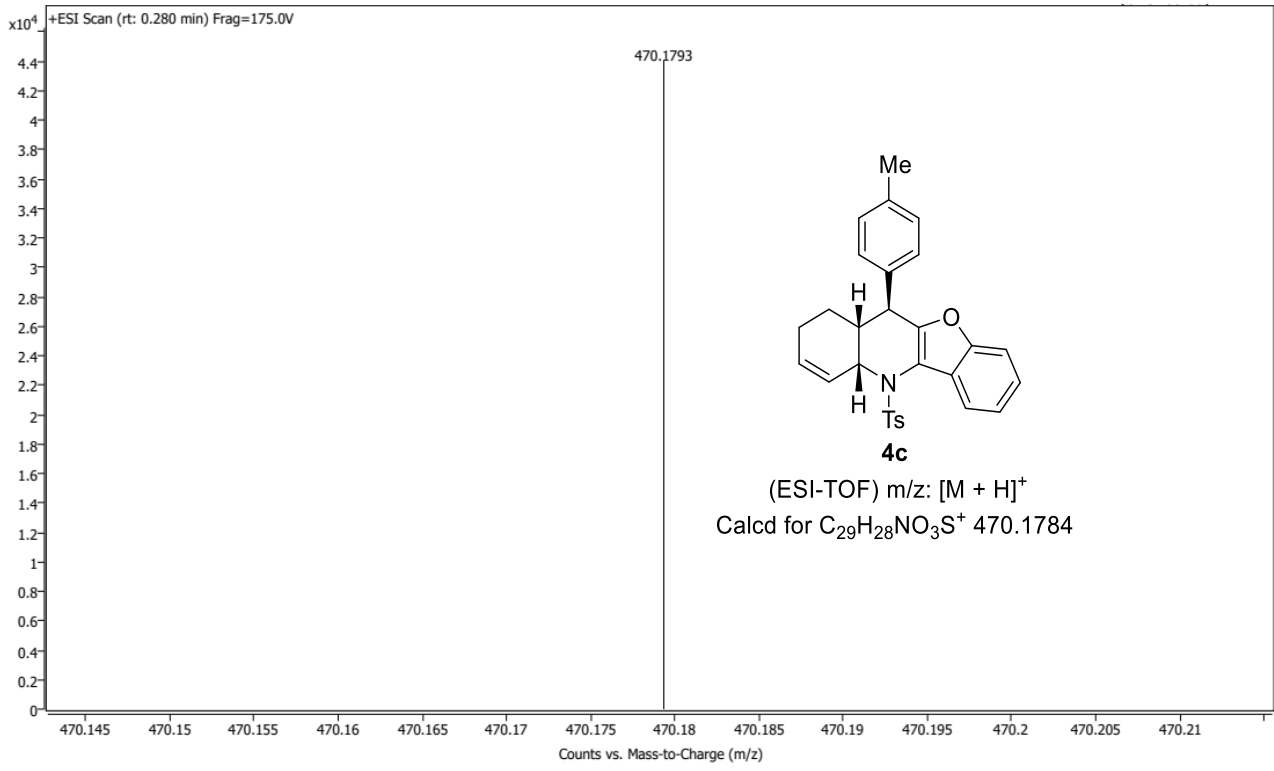

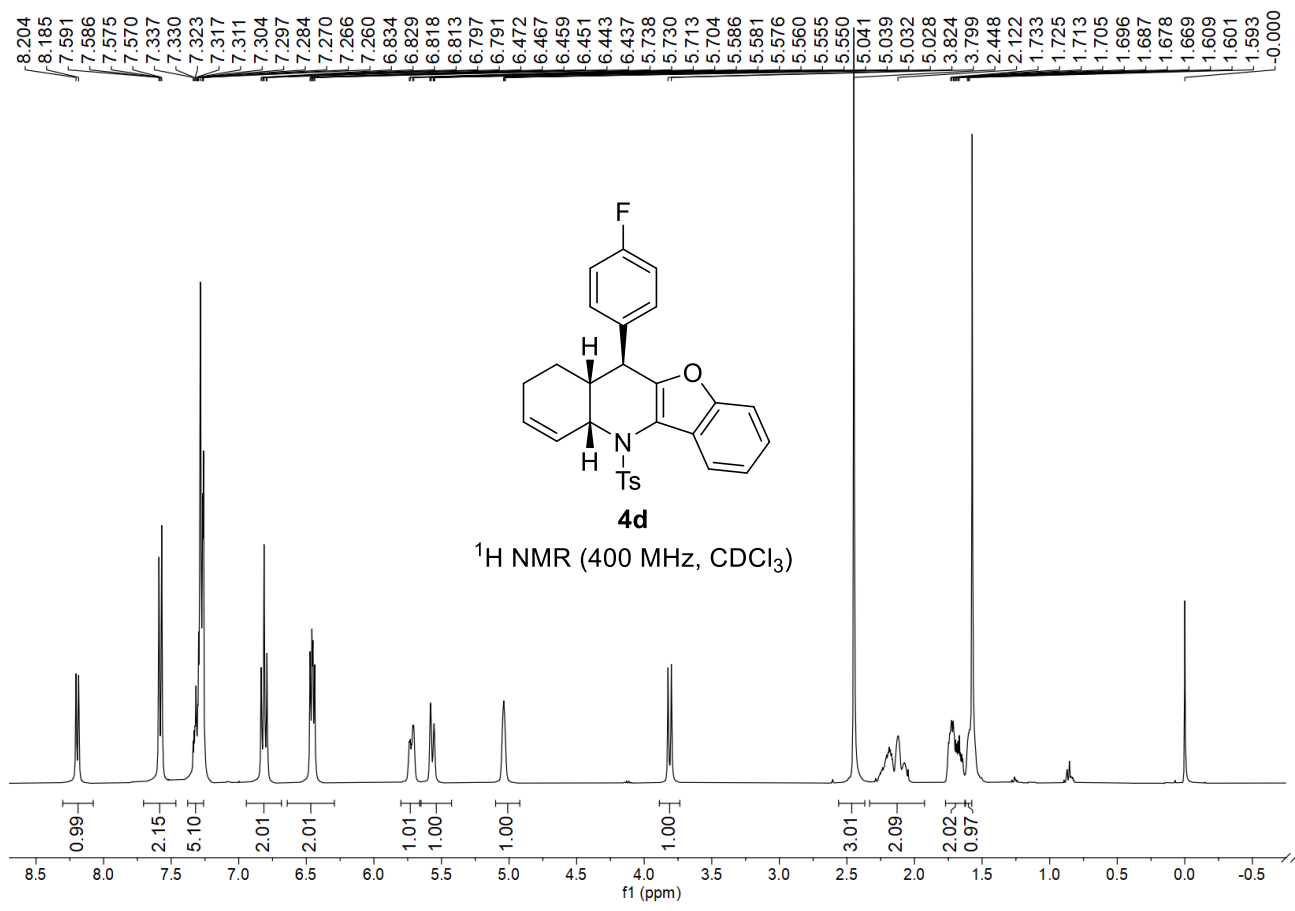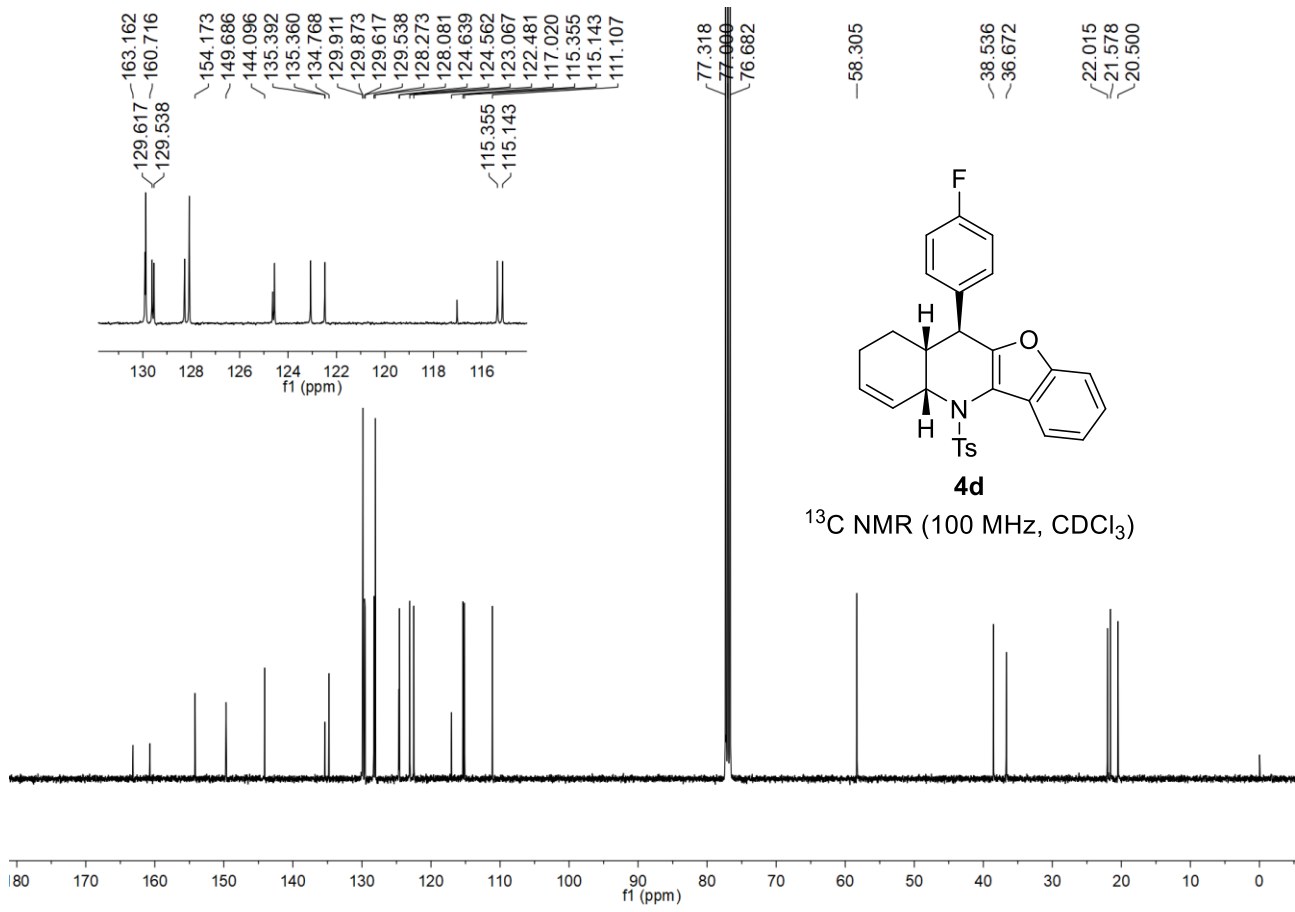



--115.131

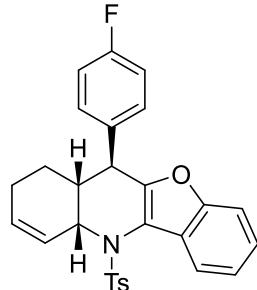

**4d**

$^{19}\text{F}$  NMR (375 MHz,  $\text{CDCl}_3$ )

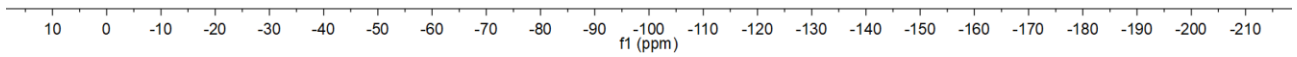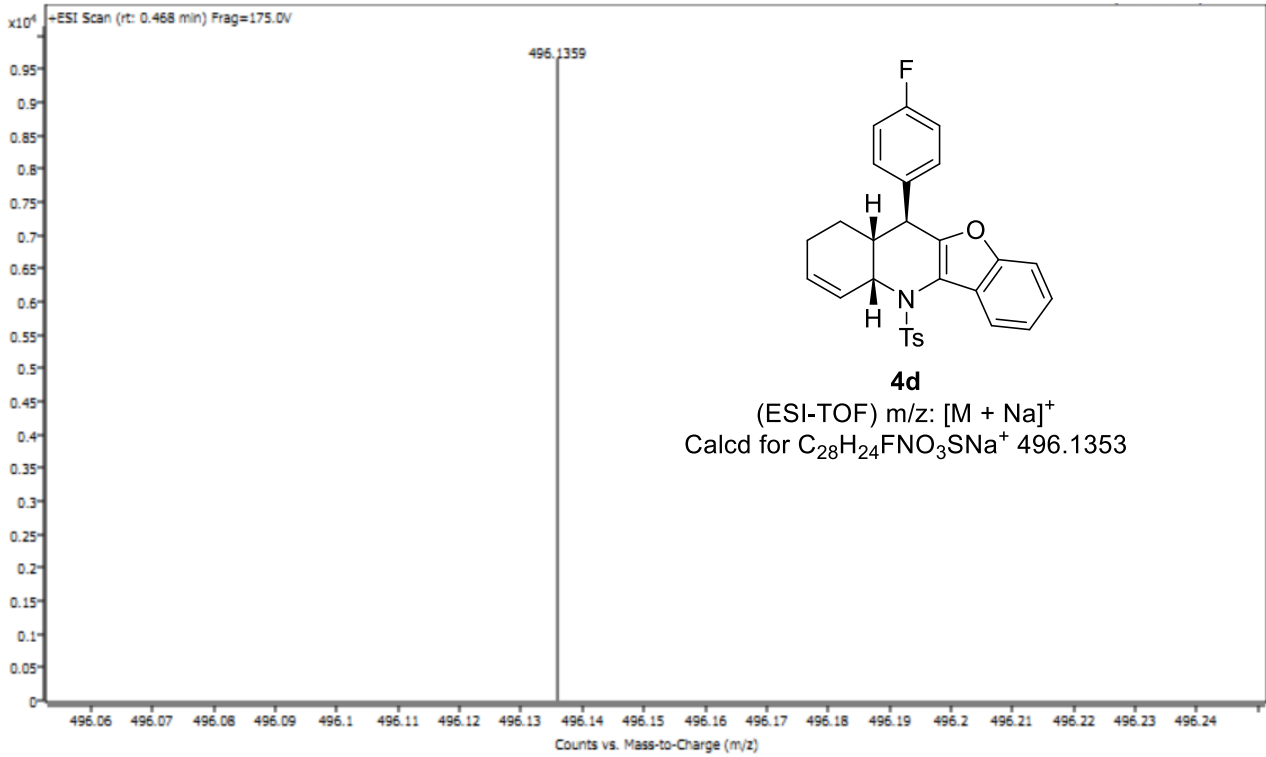

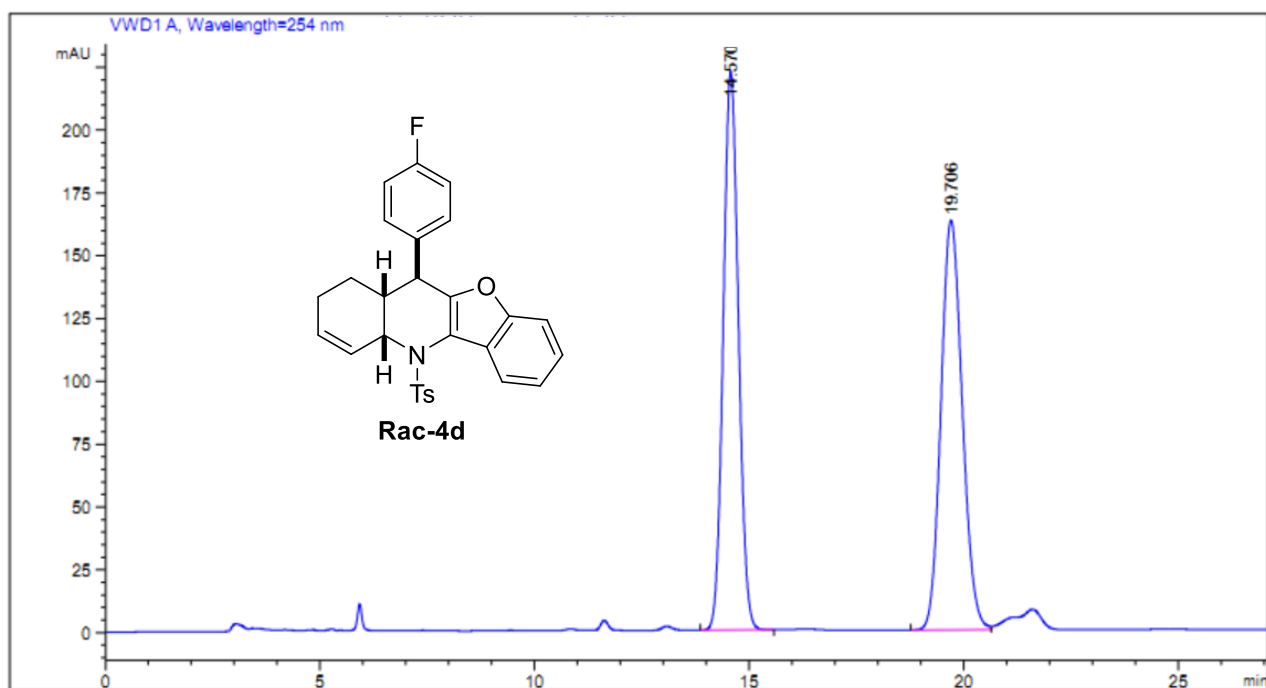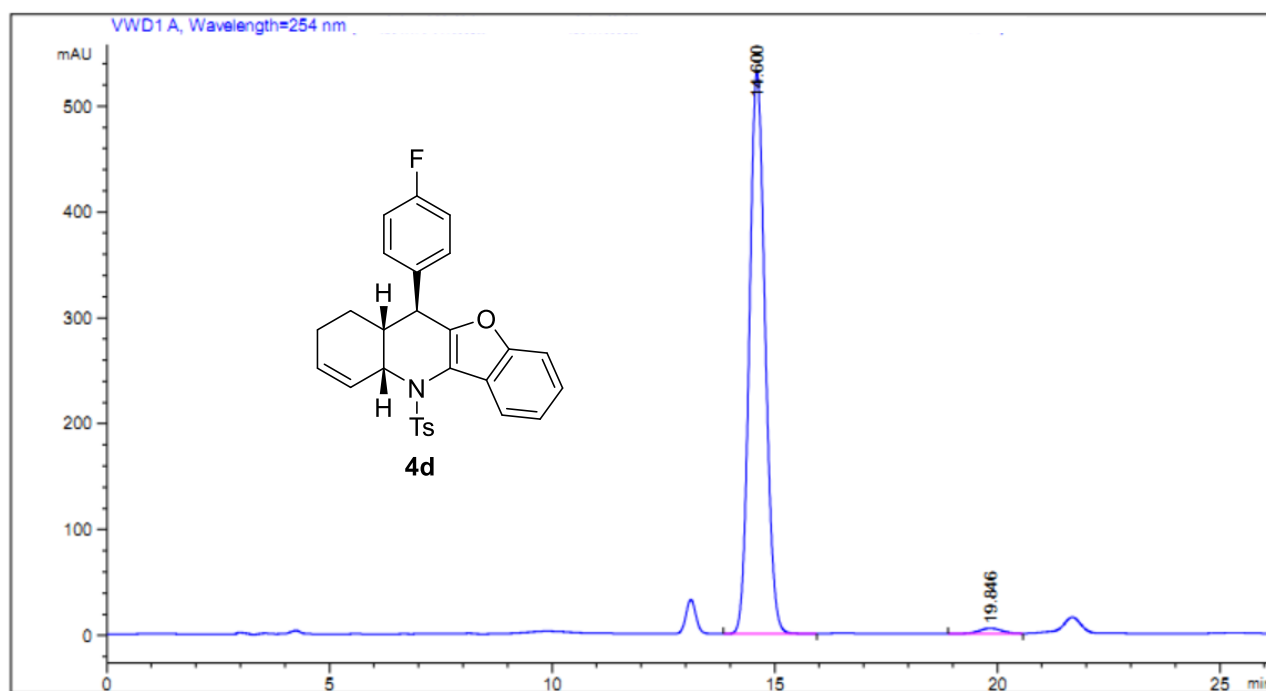

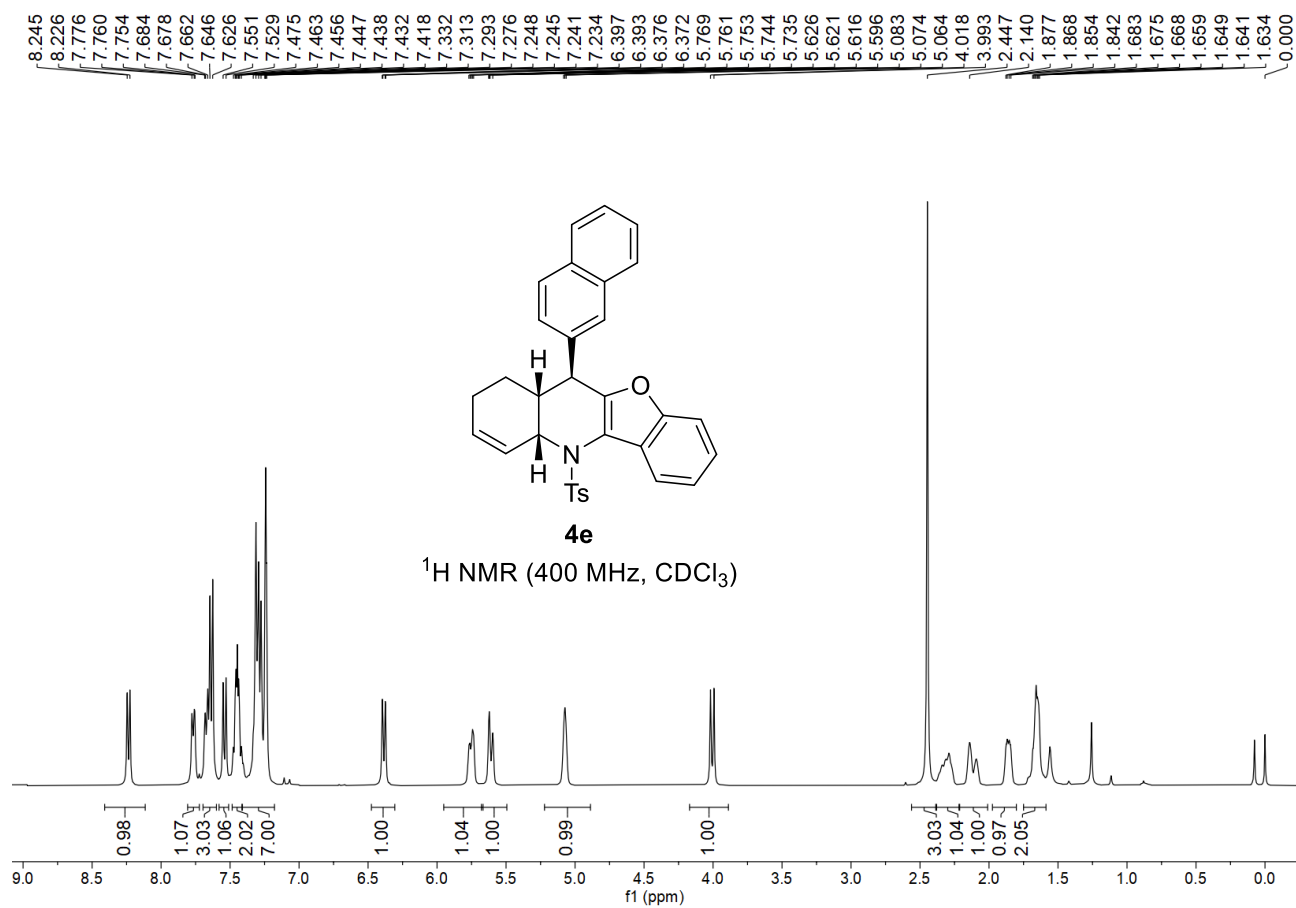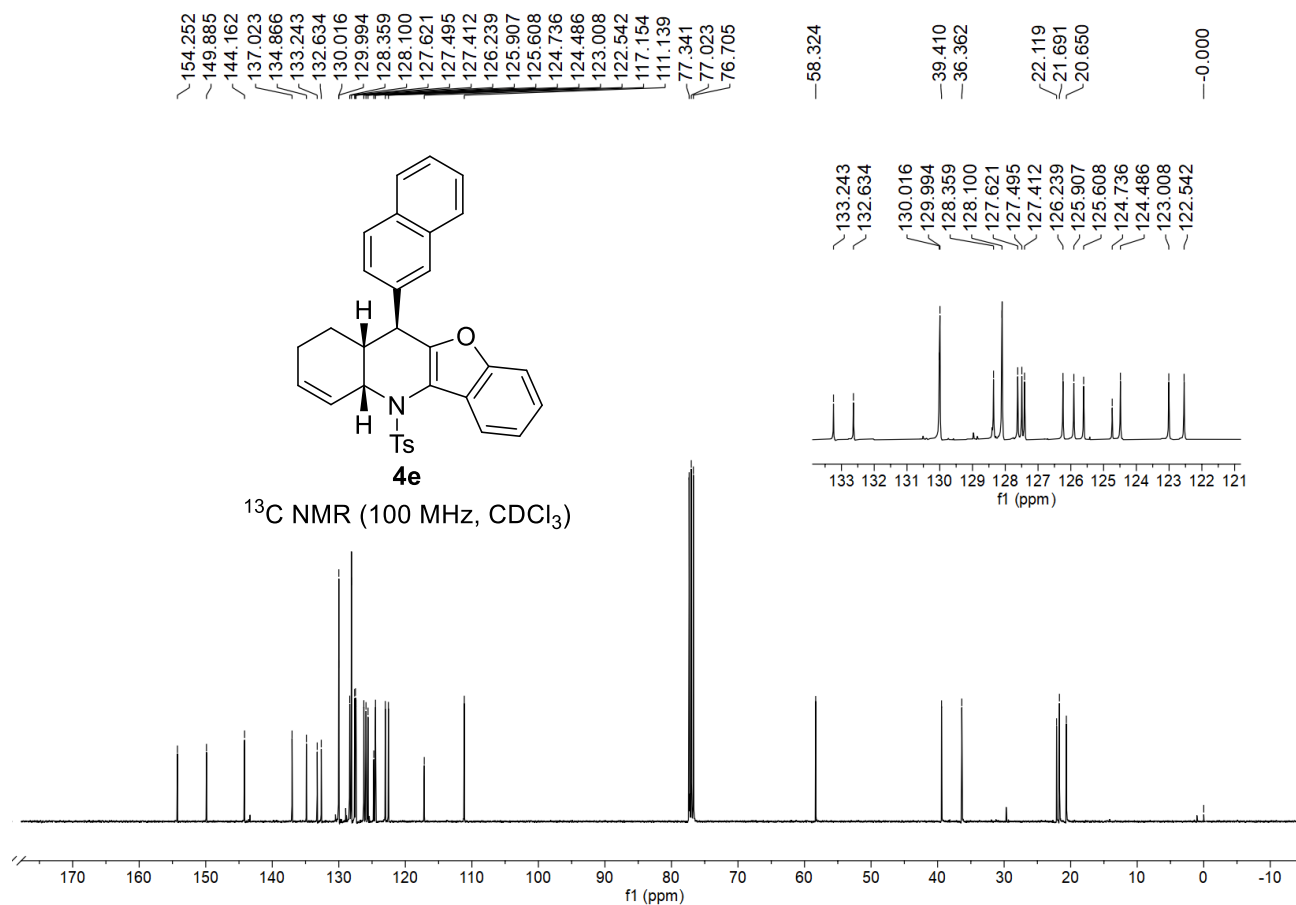

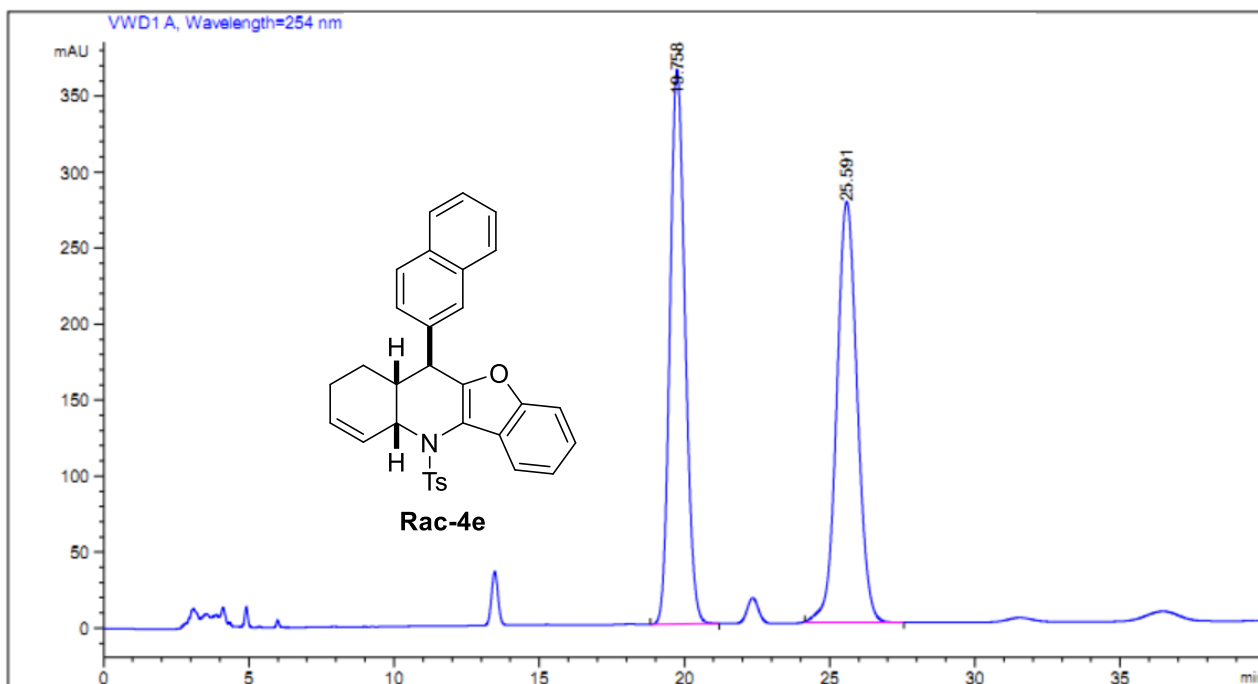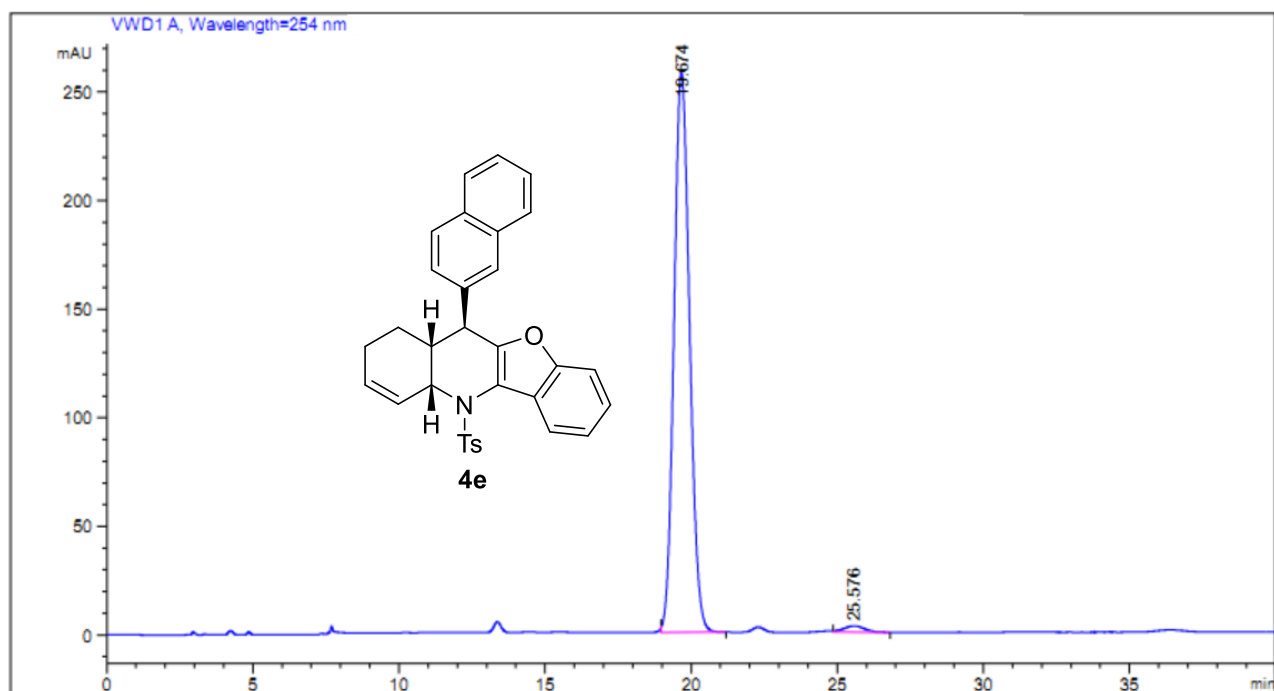

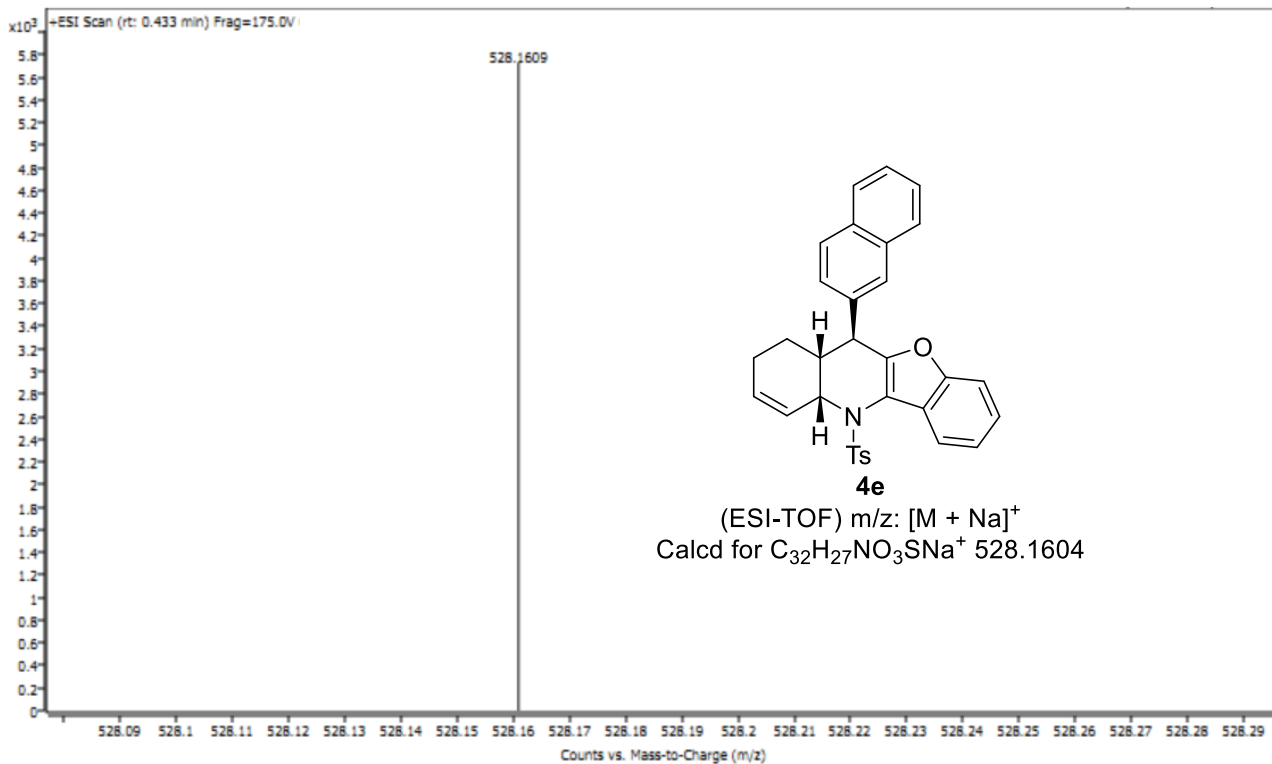

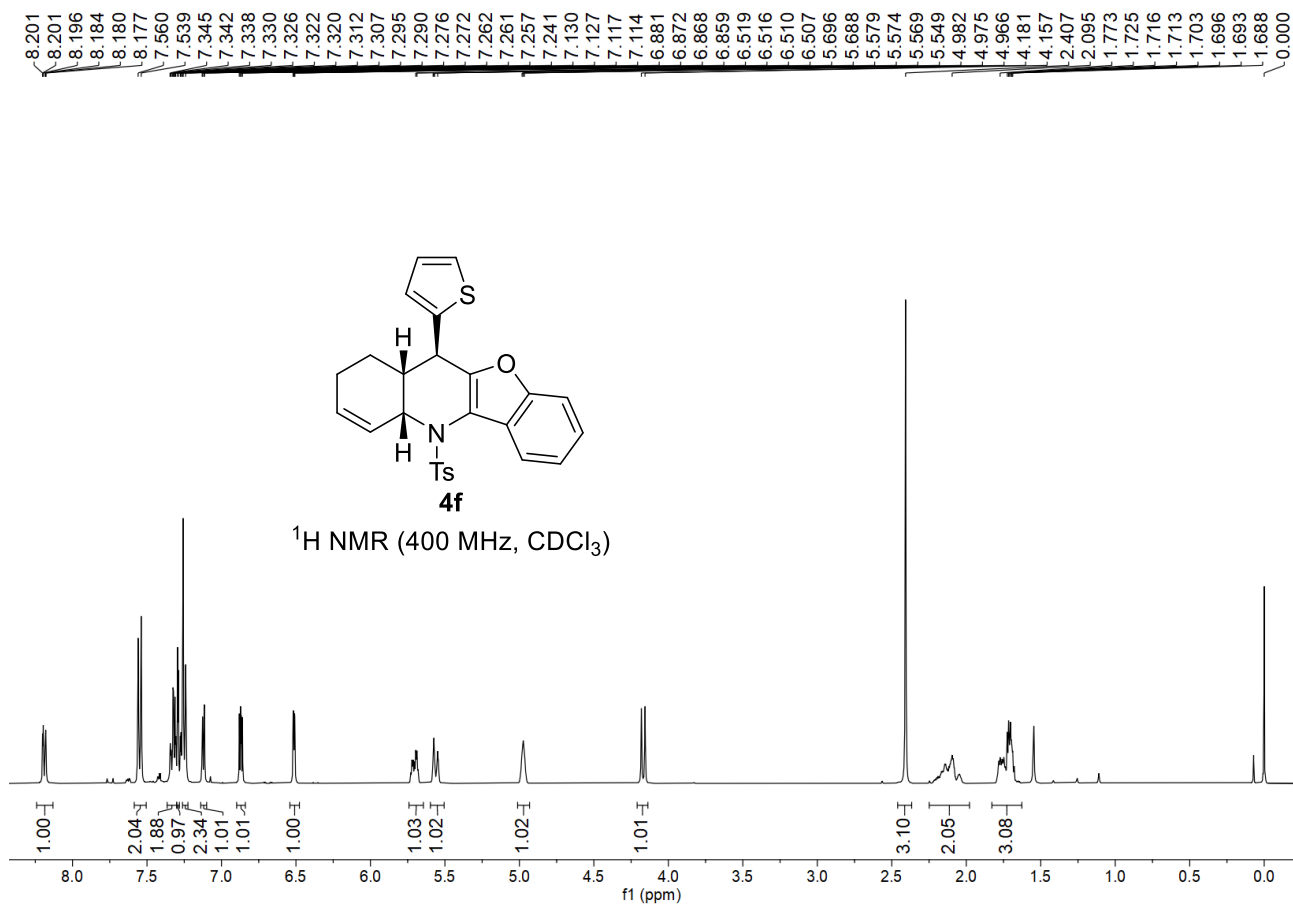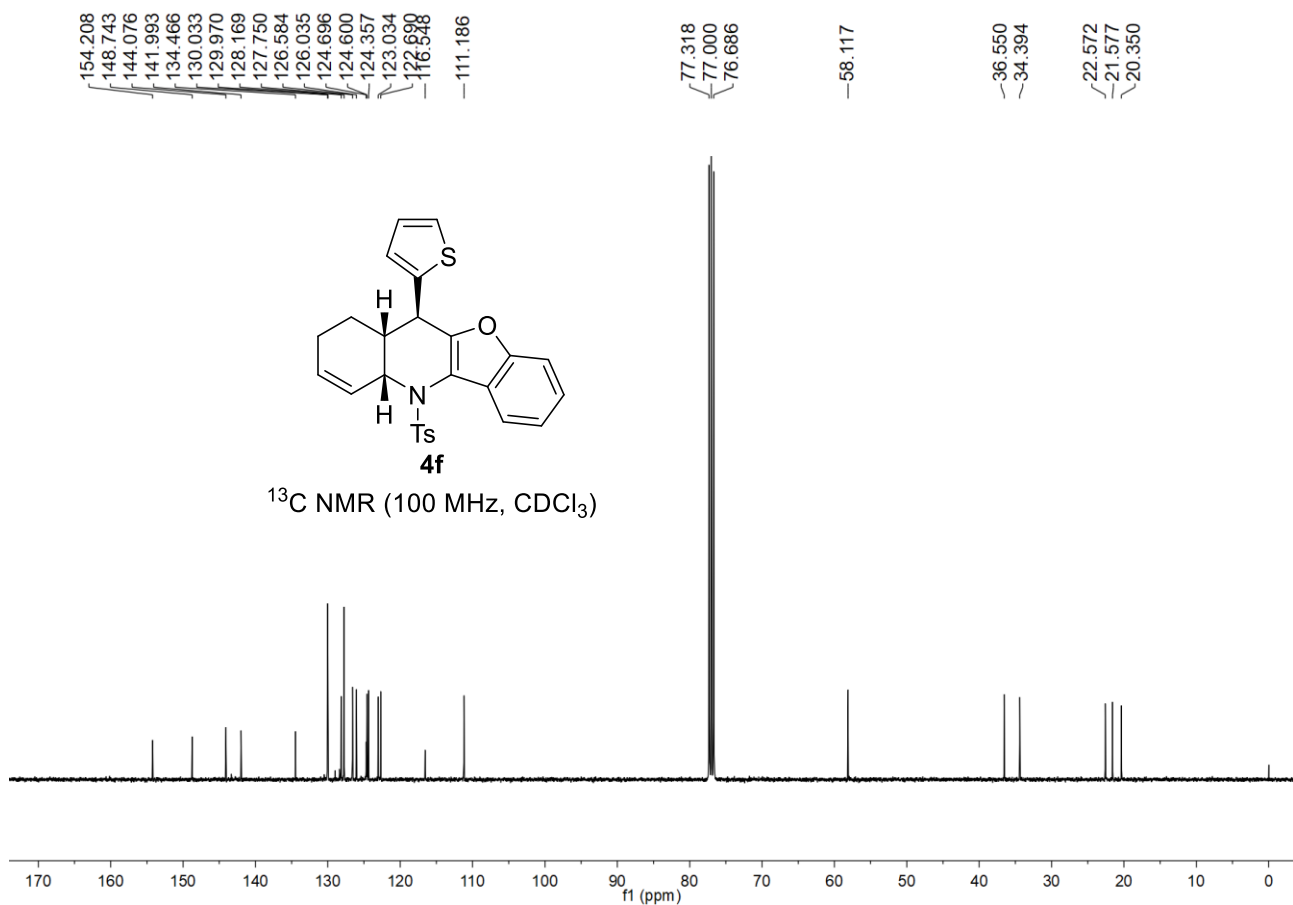

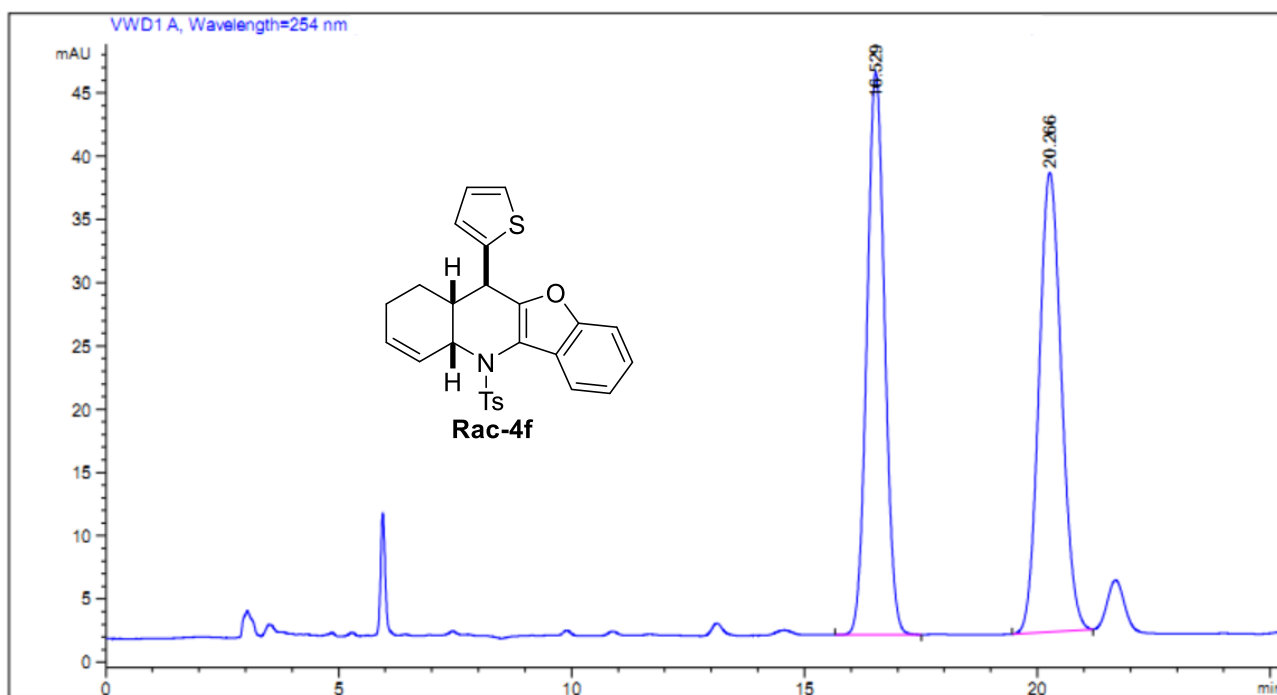

| # | [min]     | [min]  | [mAU*s]    | [mAU]    | %       |
|---|-----------|--------|------------|----------|---------|
| 1 | 16.529 BB | 0.4140 | 1178.56799 | 44.48122 | 49.1112 |
| 2 | 20.266 BB | 0.5221 | 1221.22815 | 36.29995 | 50.8888 |

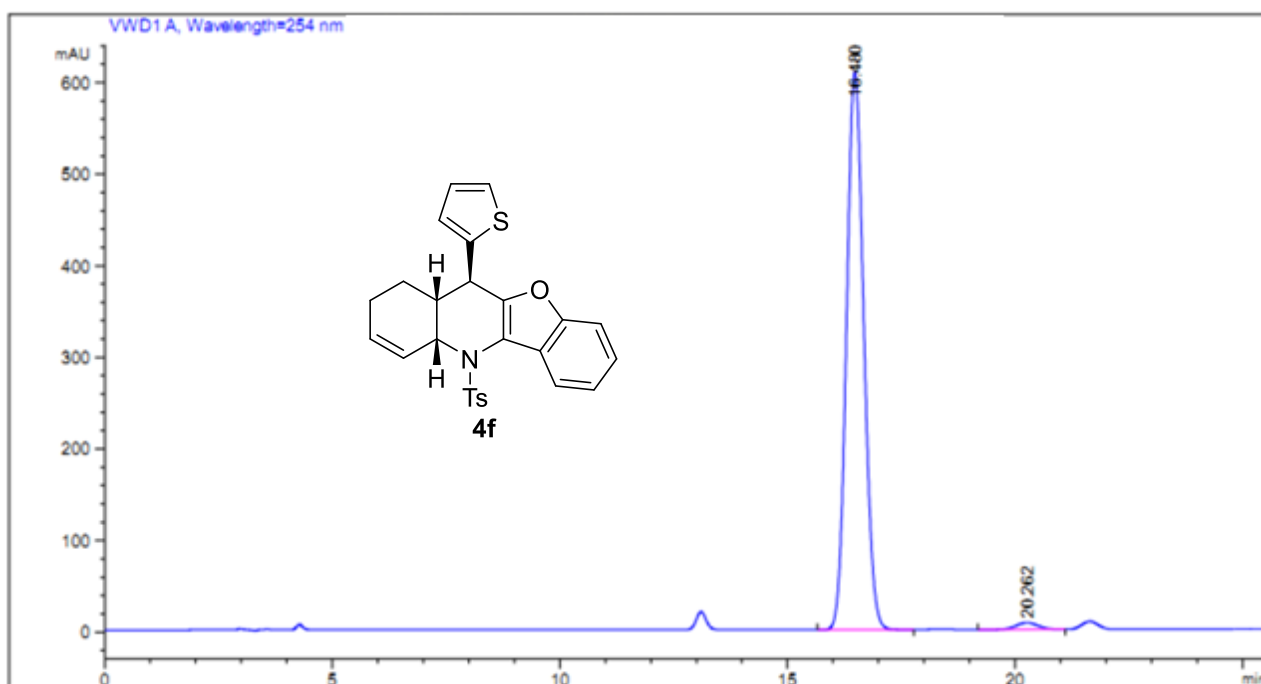

| # | [min]     | [min]  | [mAU*s]   | [mAU]     | %       |
|---|-----------|--------|-----------|-----------|---------|
| 1 | 16.480 BB | 0.4099 | 1.59952e4 | 608.75262 | 98.4334 |
| 2 | 20.262 BB | 0.5349 | 254.57562 | 7.40803   | 1.5666  |

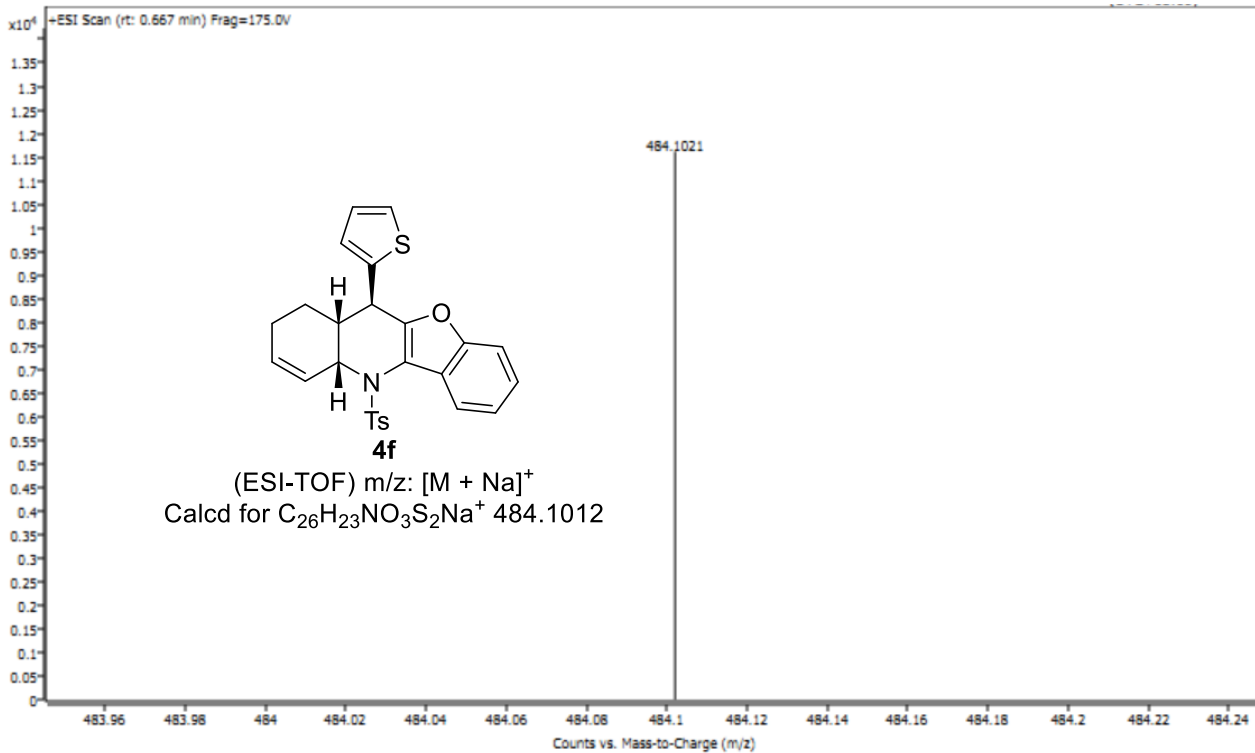



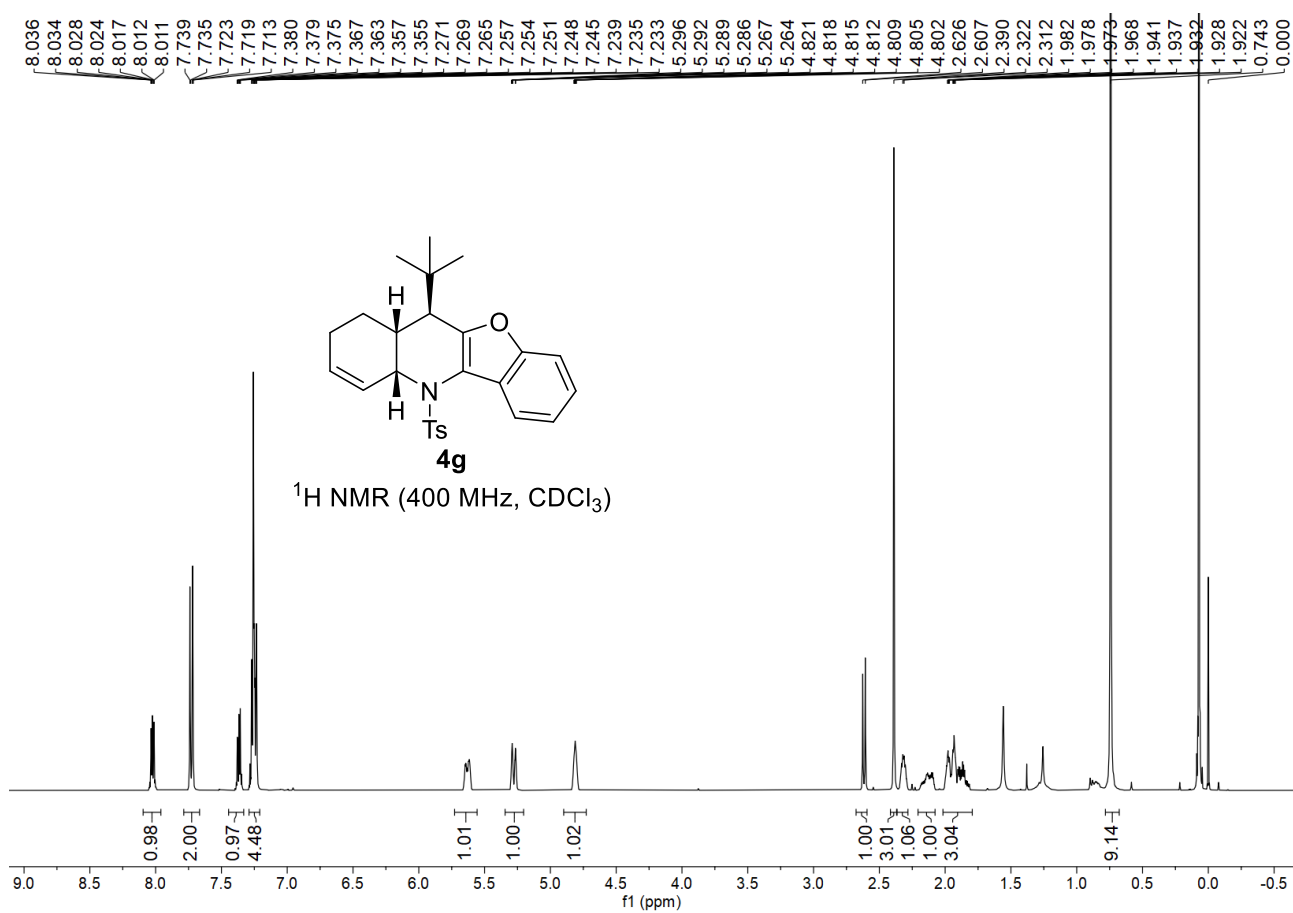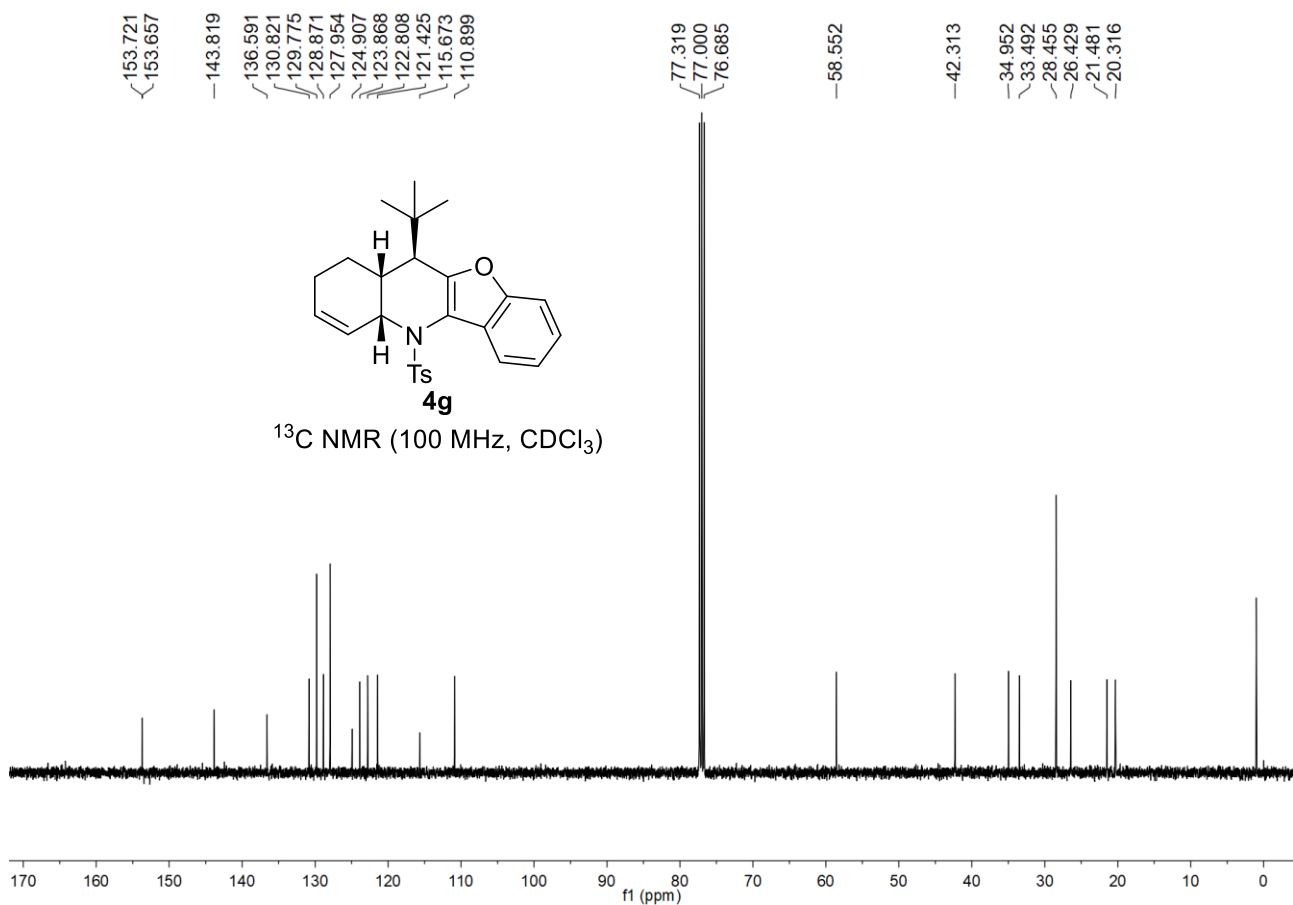

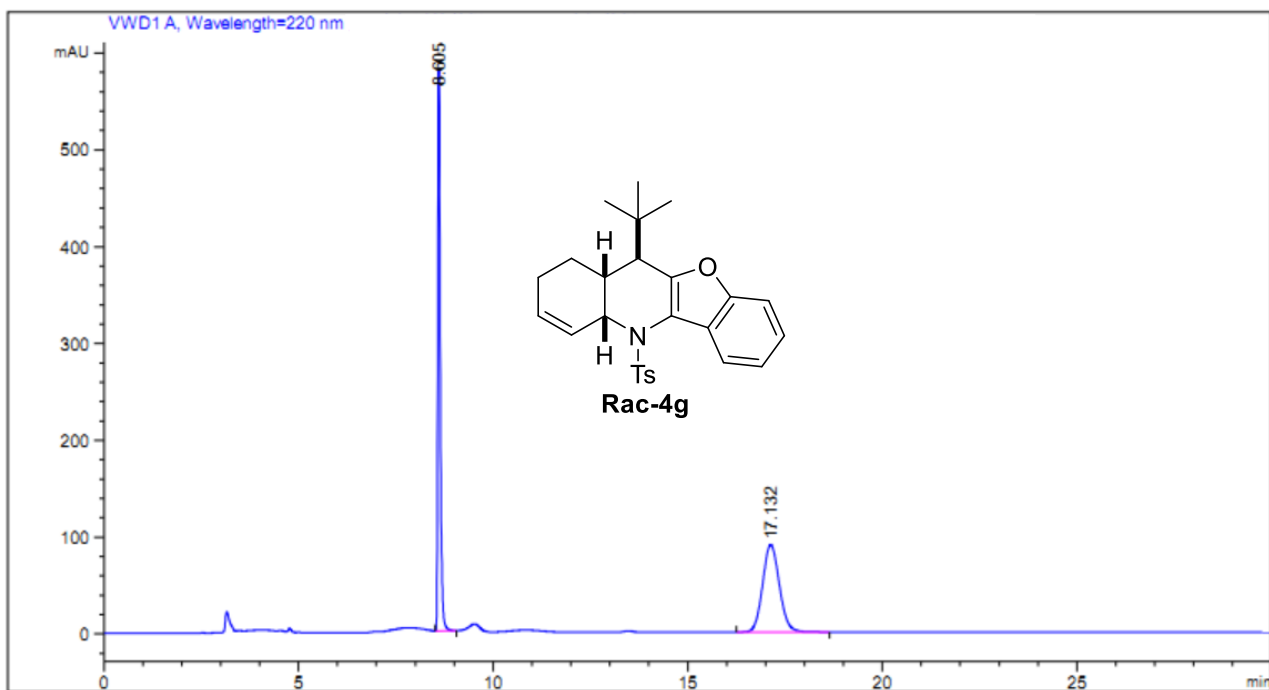

| # | [min]     | [min]  | [mAU*s]    | [mAU]     | %       |
|---|-----------|--------|------------|-----------|---------|
| 1 | 8.605 BB  | 0.0653 | 2517.97241 | 579.26654 | 48.3107 |
| 2 | 17.132 BB | 0.4630 | 2694.06689 | 90.33281  | 51.6893 |

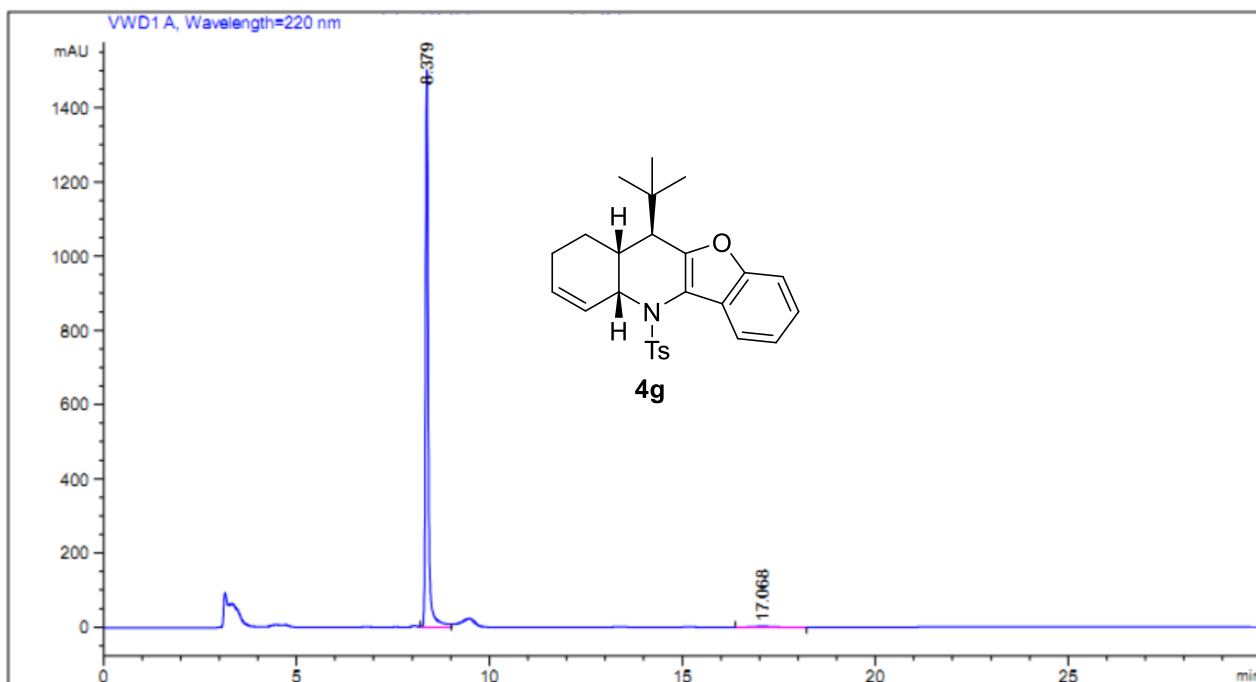

| # | [min]     | [min]  | [mAU*s]    | [mAU]      | %       |
|---|-----------|--------|------------|------------|---------|
| 1 | 8.379 VV  | 0.0730 | 7358.41504 | 1505.52246 | 99.1065 |
| 2 | 17.068 BB | 0.4730 | 66.34195   | 2.06153    | 0.8935  |

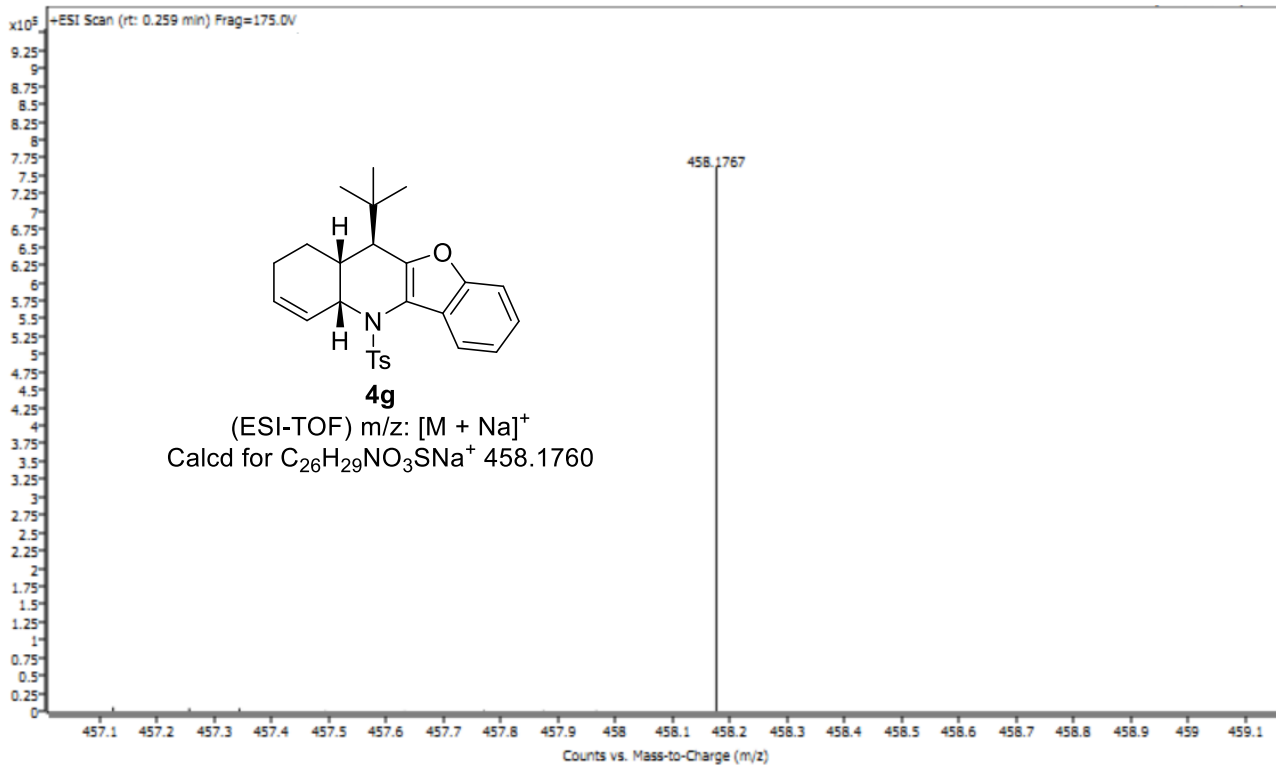

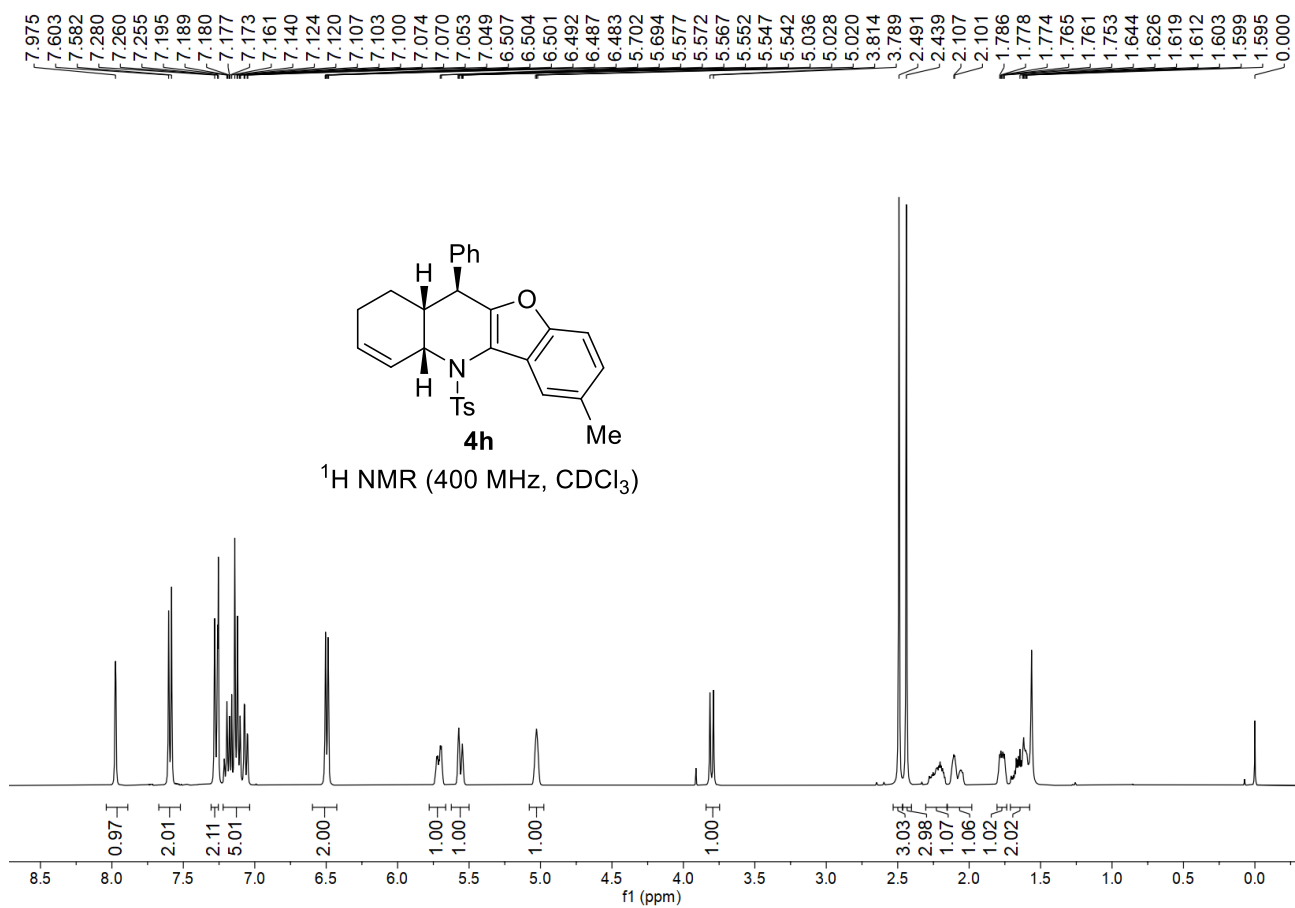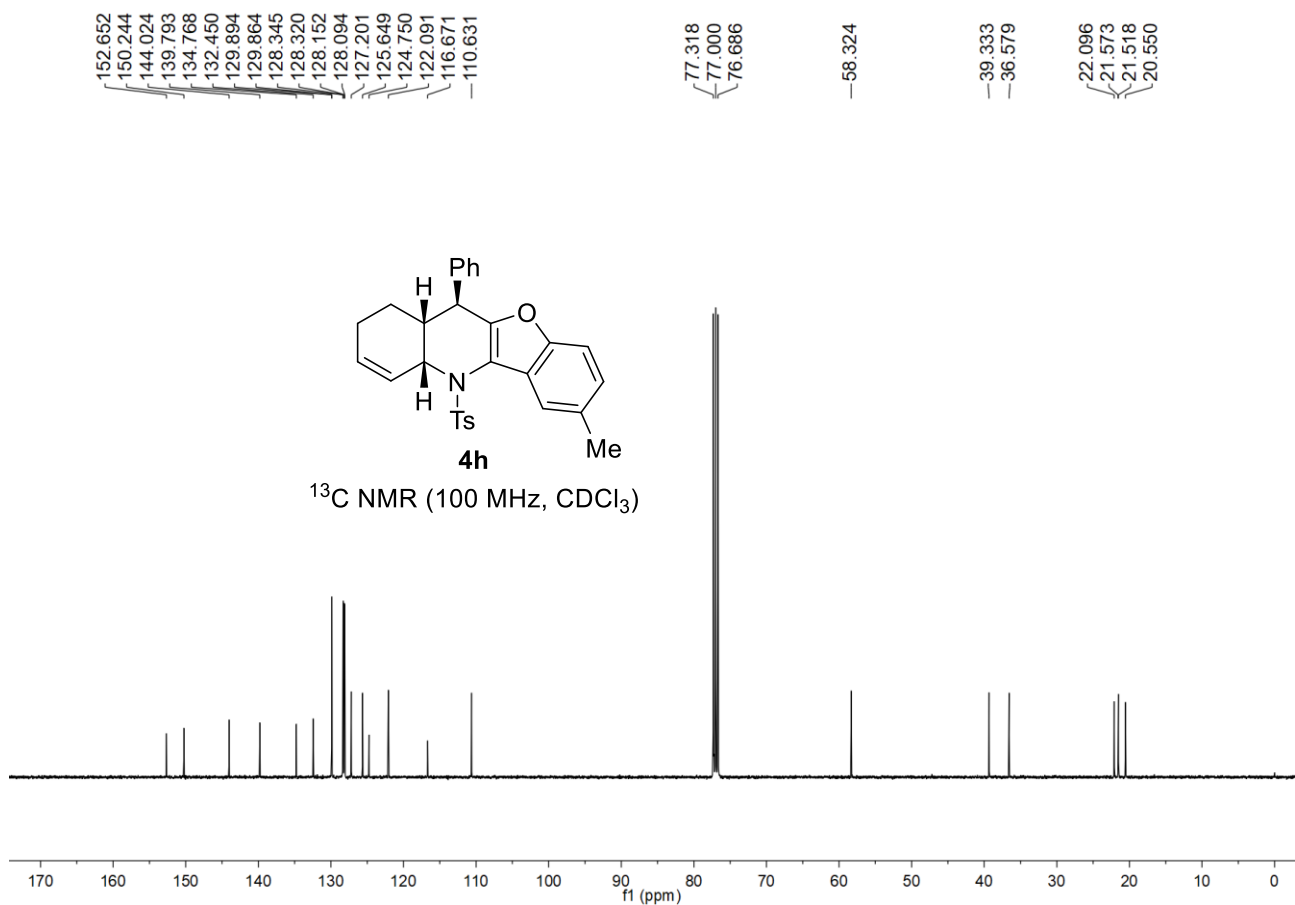

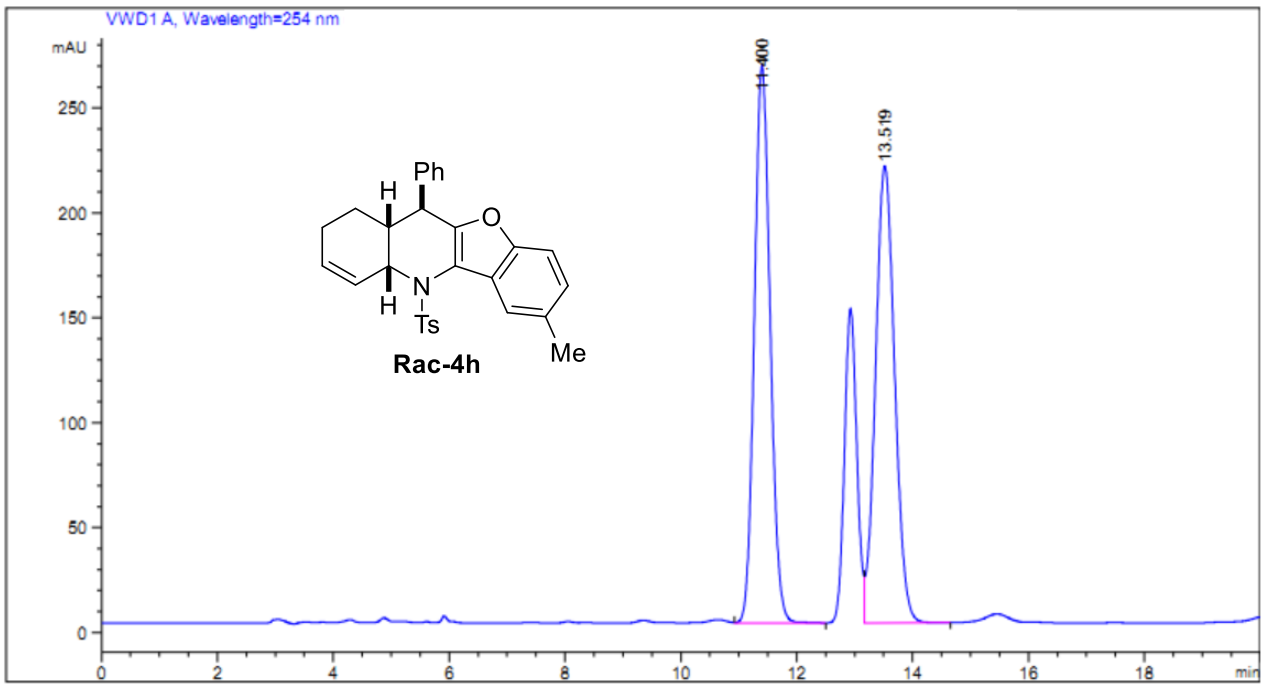

| # | [min]  |    | [min]  | [mAU*s]    | [mAU]     | %       |
|---|--------|----|--------|------------|-----------|---------|
| 1 | 11.400 | VB | 0.2955 | 5037.05176 | 265.62692 | 50.1354 |
| 2 | 13.519 | VB | 0.3571 | 5009.85352 | 217.86008 | 49.8646 |

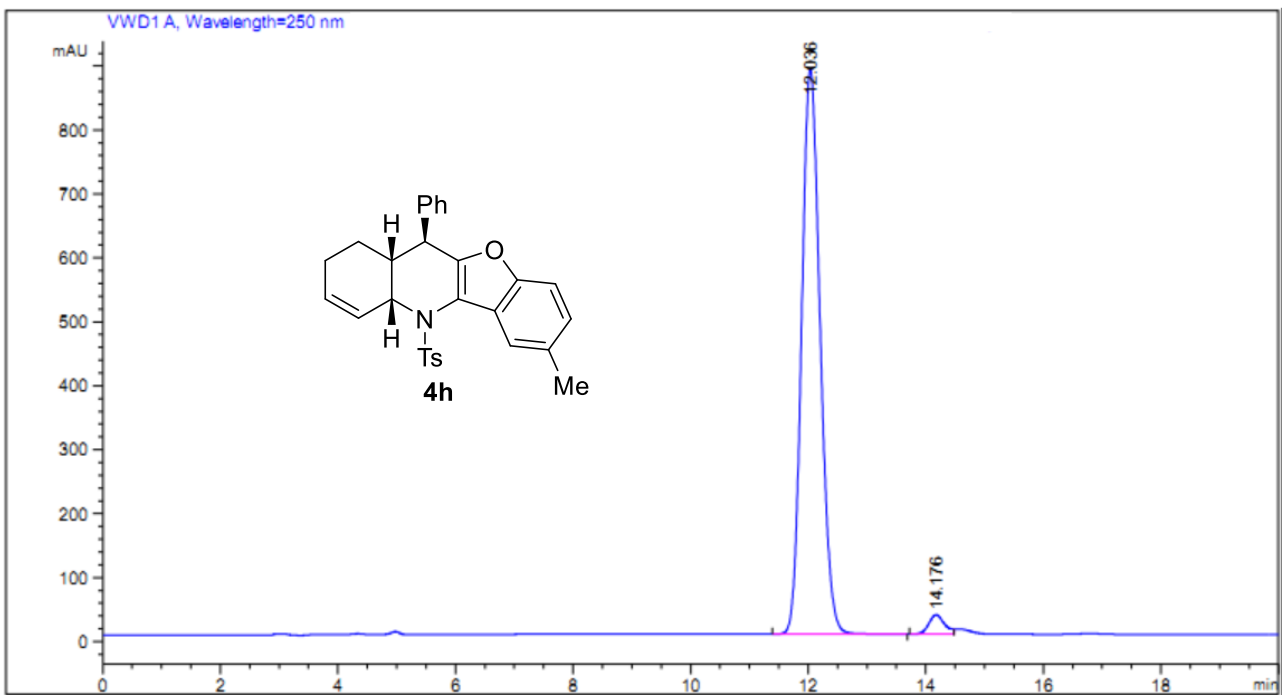

| # | [min]  |    | [min]  | [mAU*s]   | [mAU]     | %       |
|---|--------|----|--------|-----------|-----------|---------|
| 1 | 12.036 | BB | 0.3401 | 1.92412e4 | 883.25452 | 97.1641 |
| 2 | 14.176 | BV | 0.2834 | 561.59491 | 30.07371  | 2.8359  |

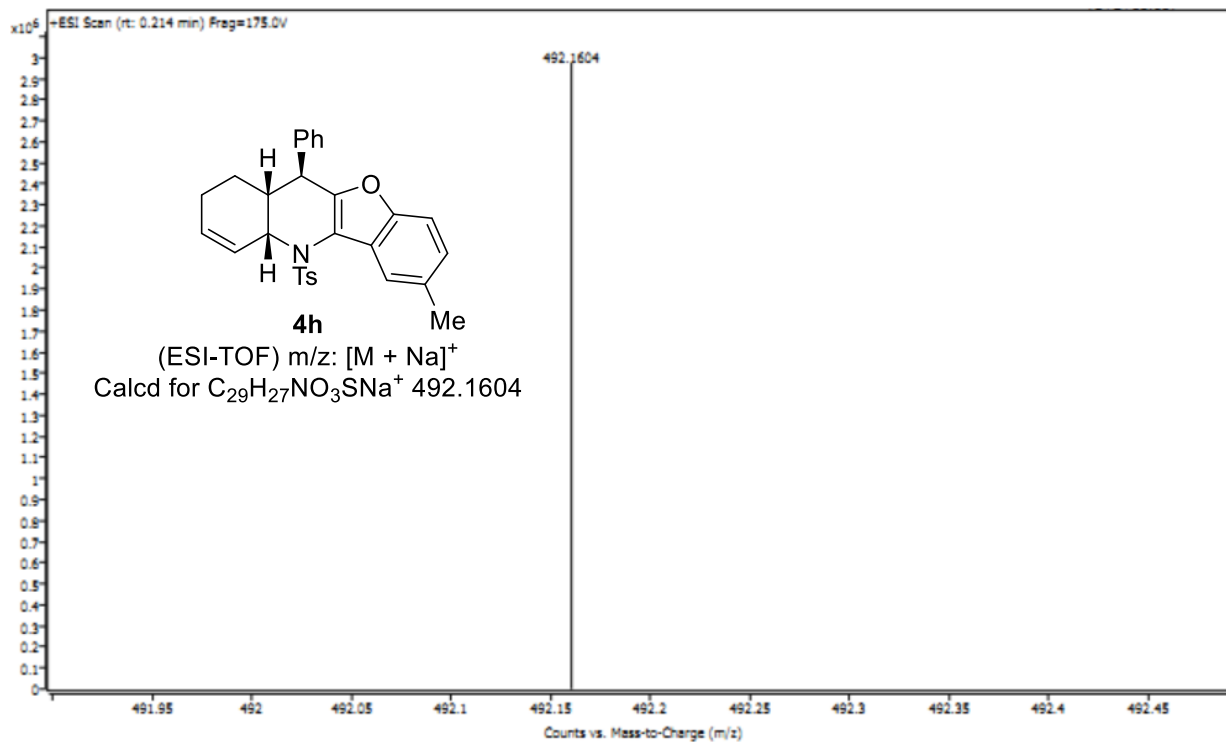

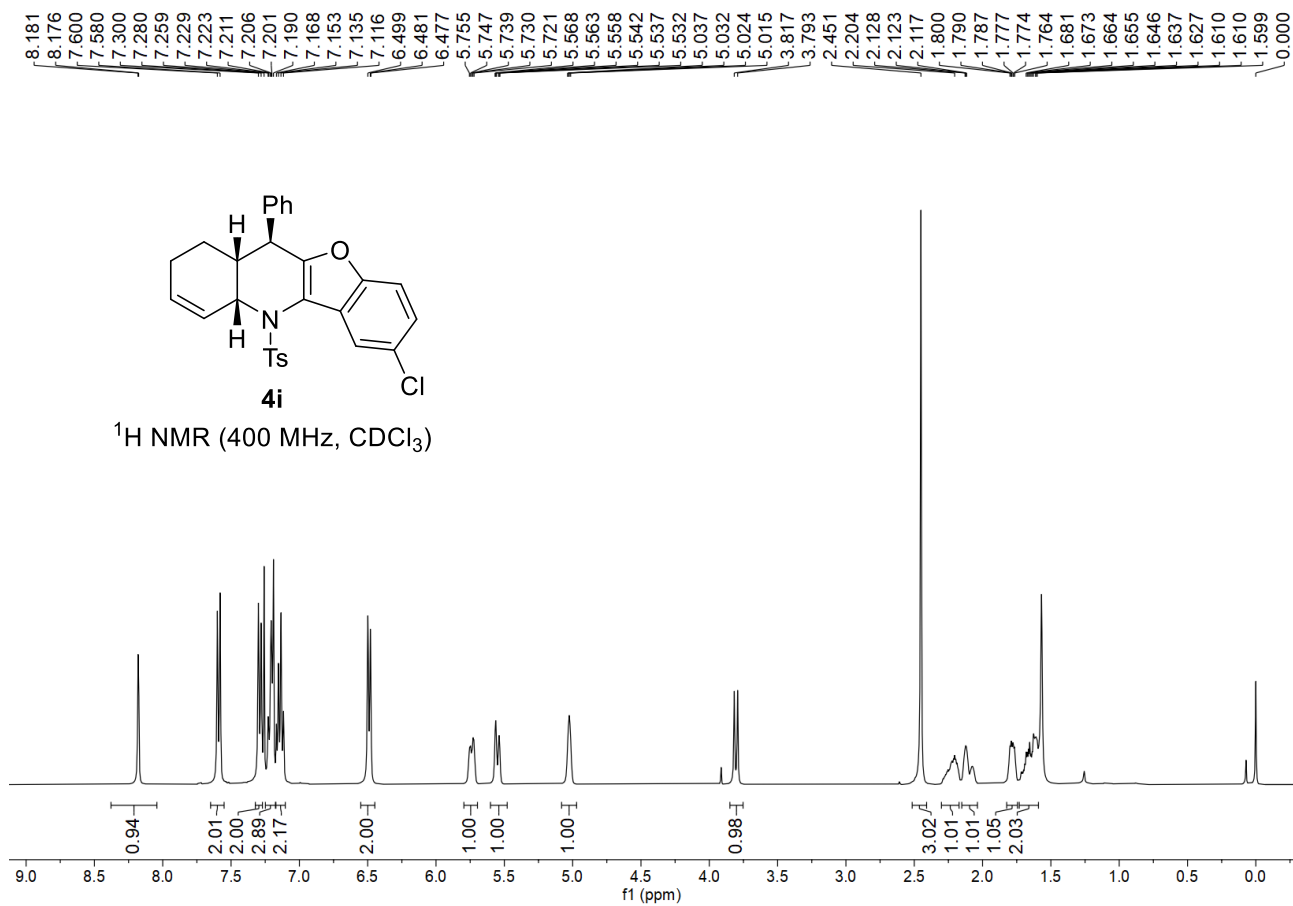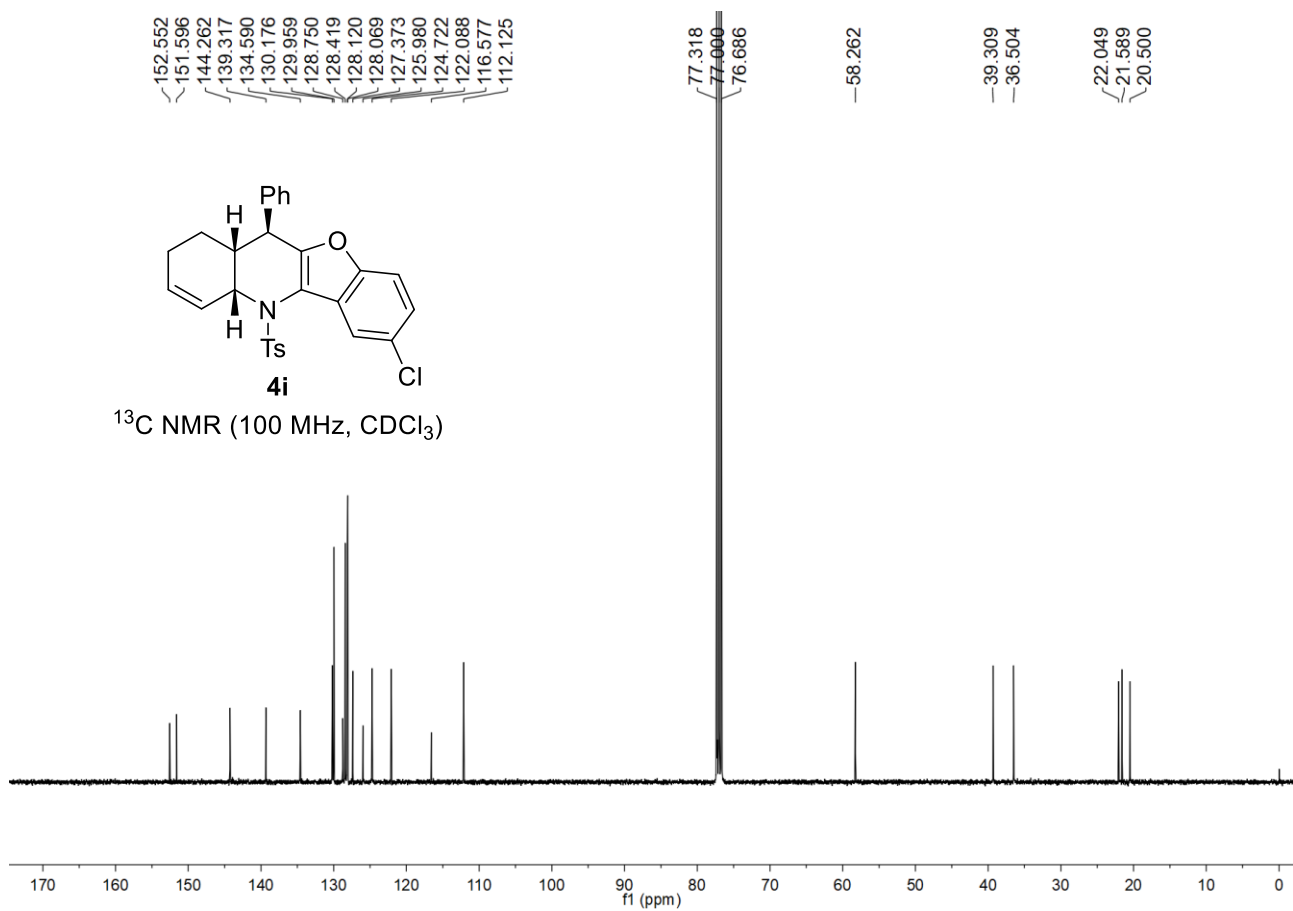

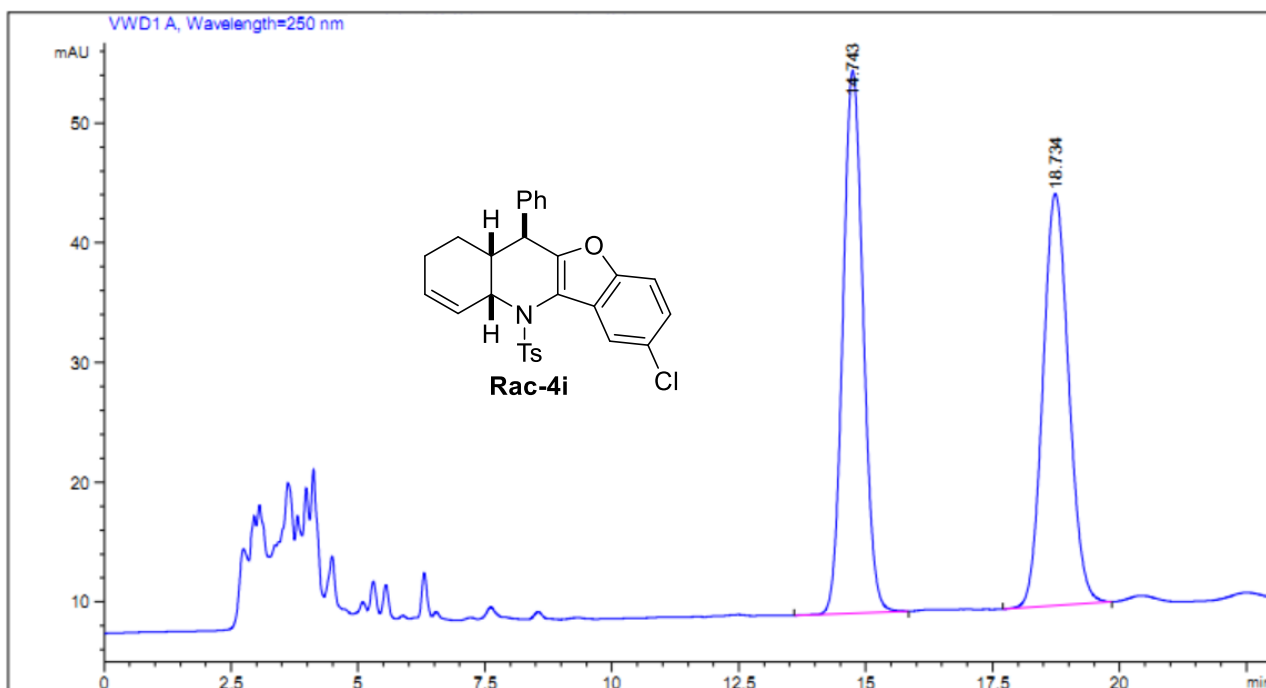

| # | [min]     | [min]  | [mAU*s]    | [mAU]    | %       |
|---|-----------|--------|------------|----------|---------|
| 1 | 14.743 BB | 0.4342 | 1257.26282 | 45.33516 | 50.8213 |
| 2 | 18.734 BB | 0.5536 | 1216.62671 | 34.42382 | 49.1787 |

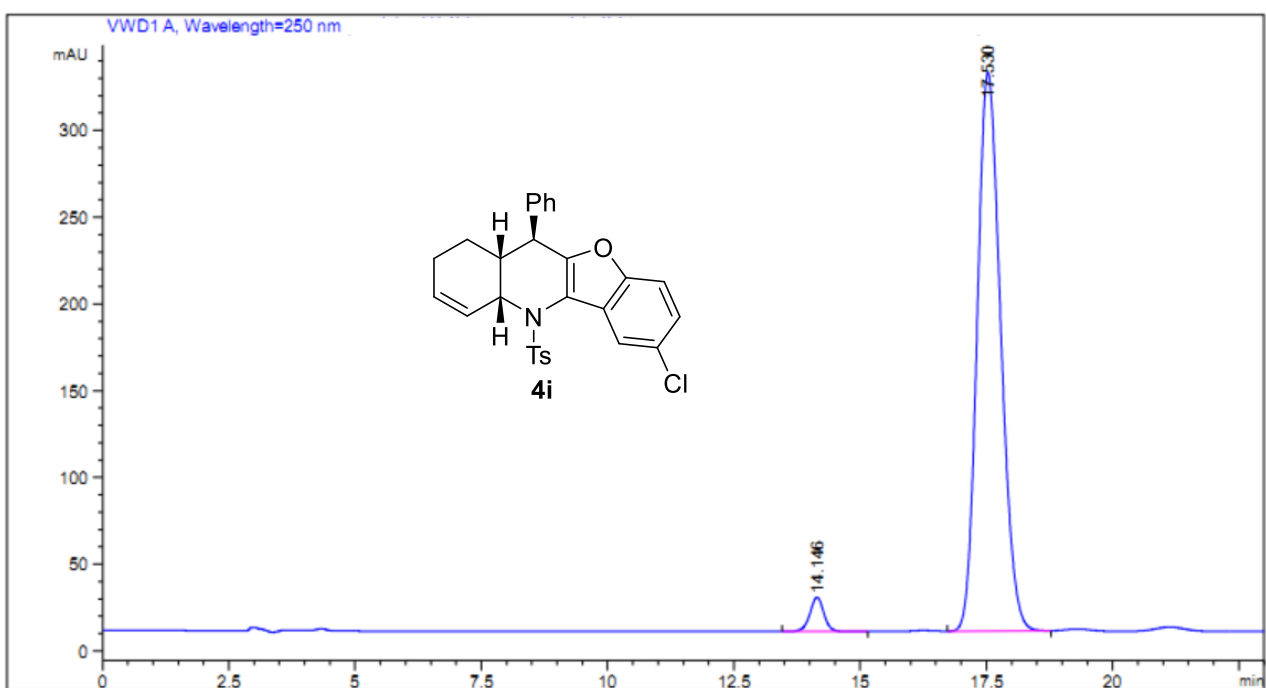

| # | [min]     | [min]  | [mAU*s]   | [mAU]     | %       |
|---|-----------|--------|-----------|-----------|---------|
| 1 | 14.146 BB | 0.2951 | 381.65308 | 19.77401  | 3.5419  |
| 2 | 17.530 BB | 0.5035 | 1.03937e4 | 321.75018 | 96.4581 |



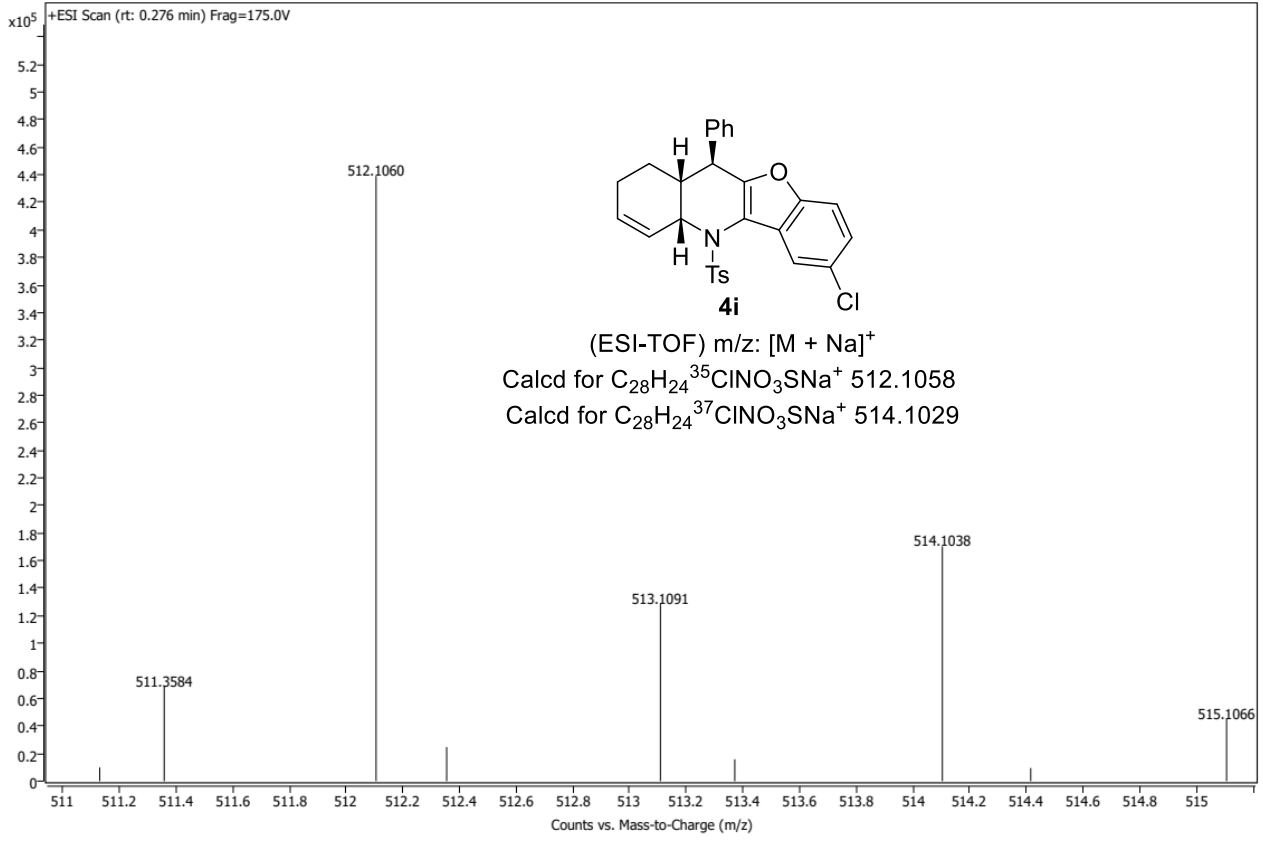

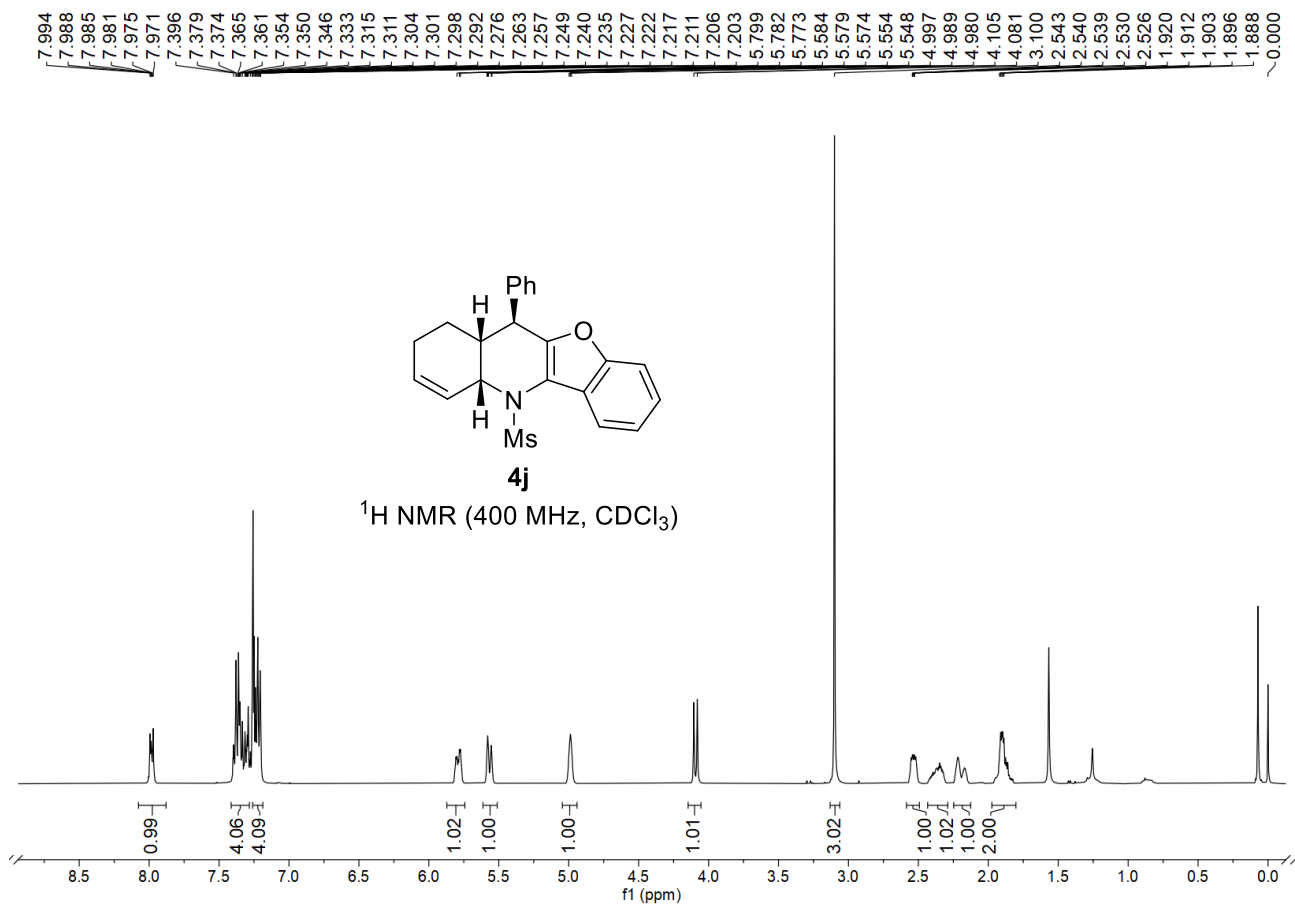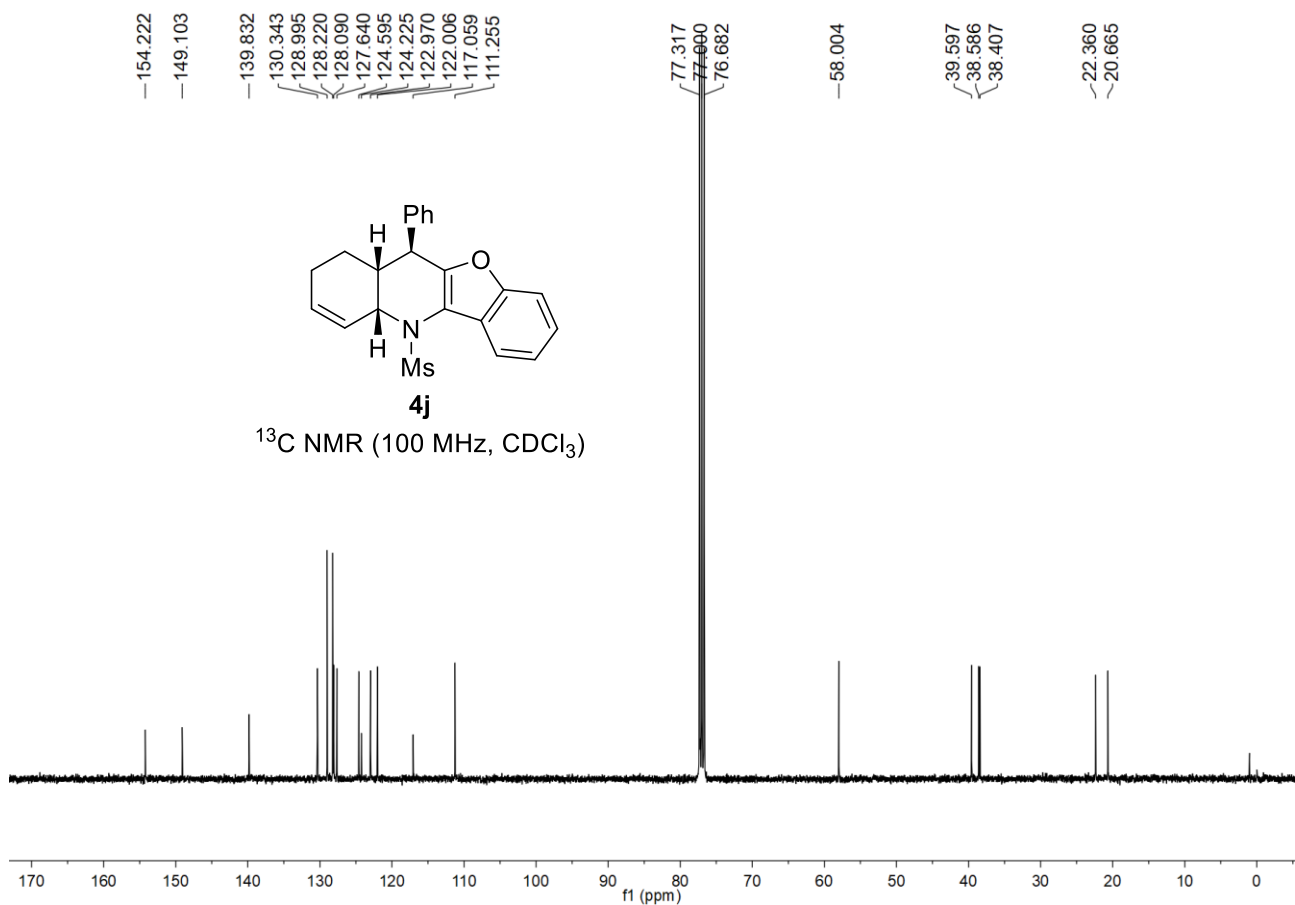

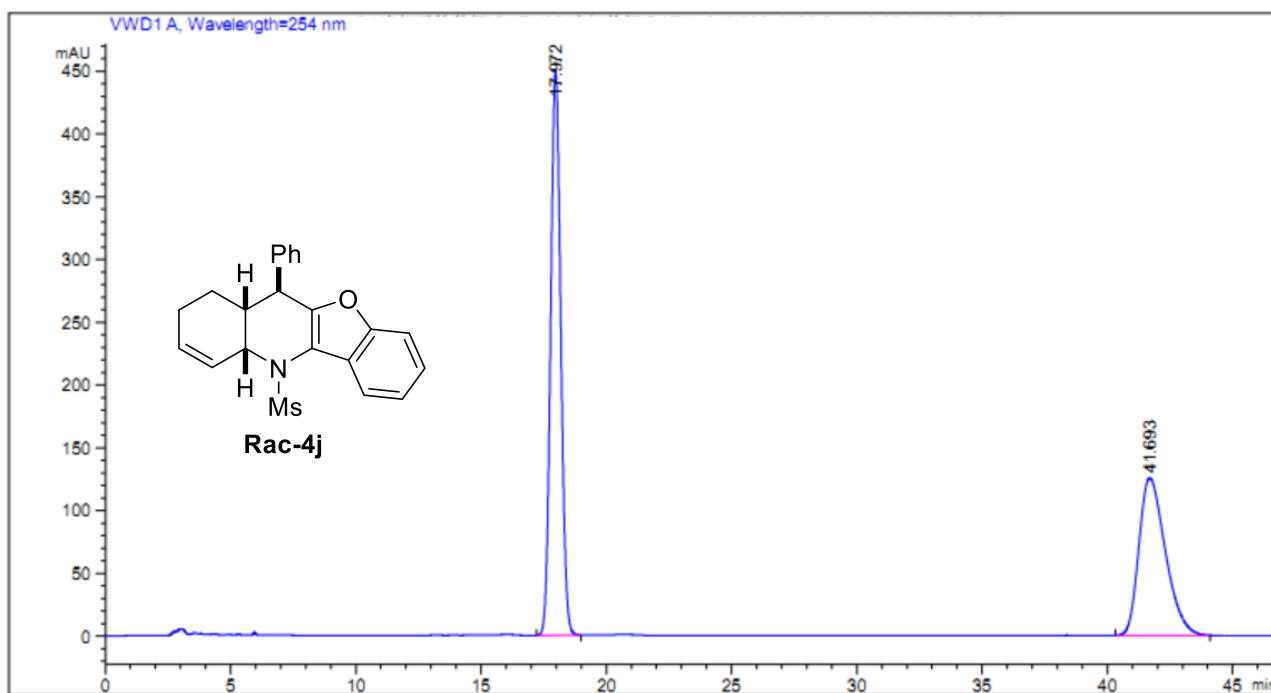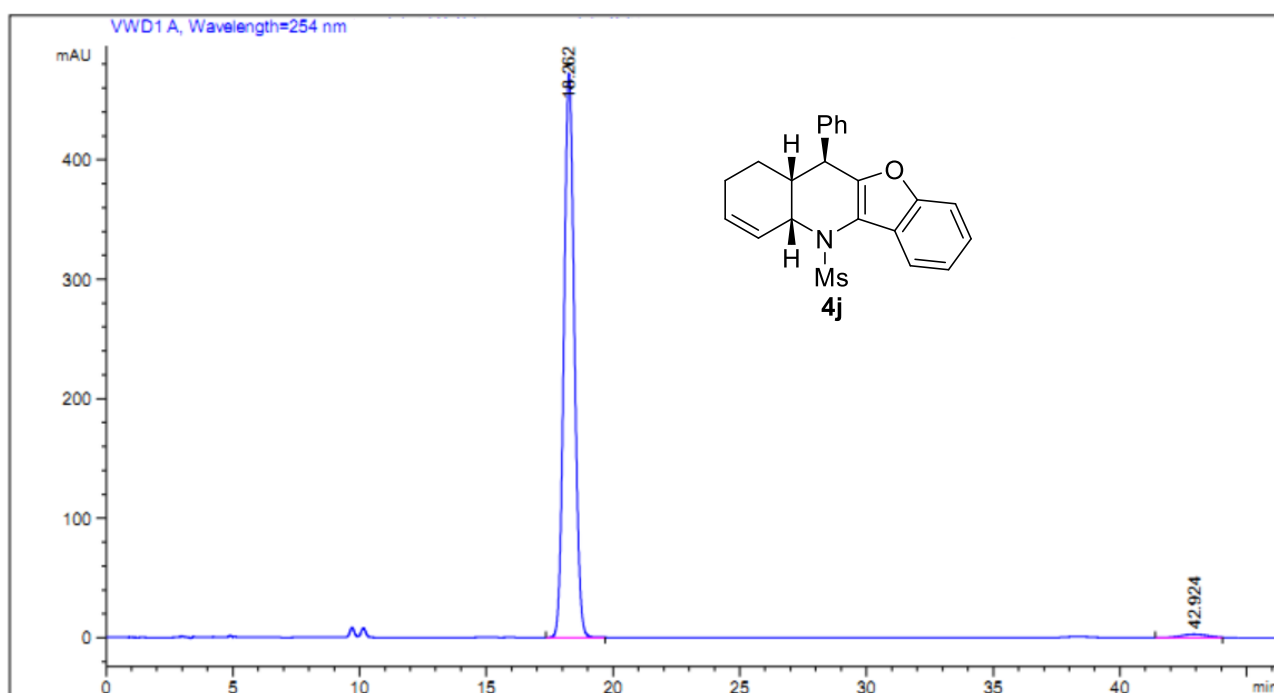

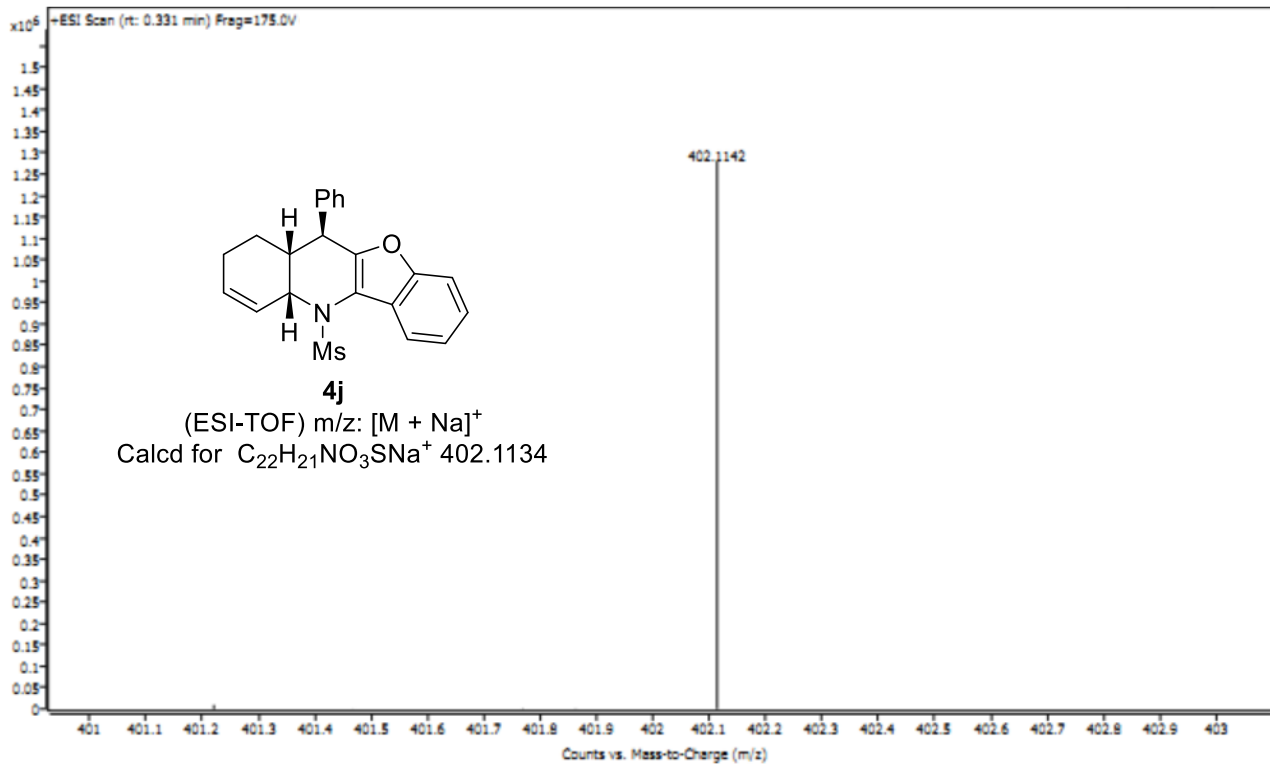

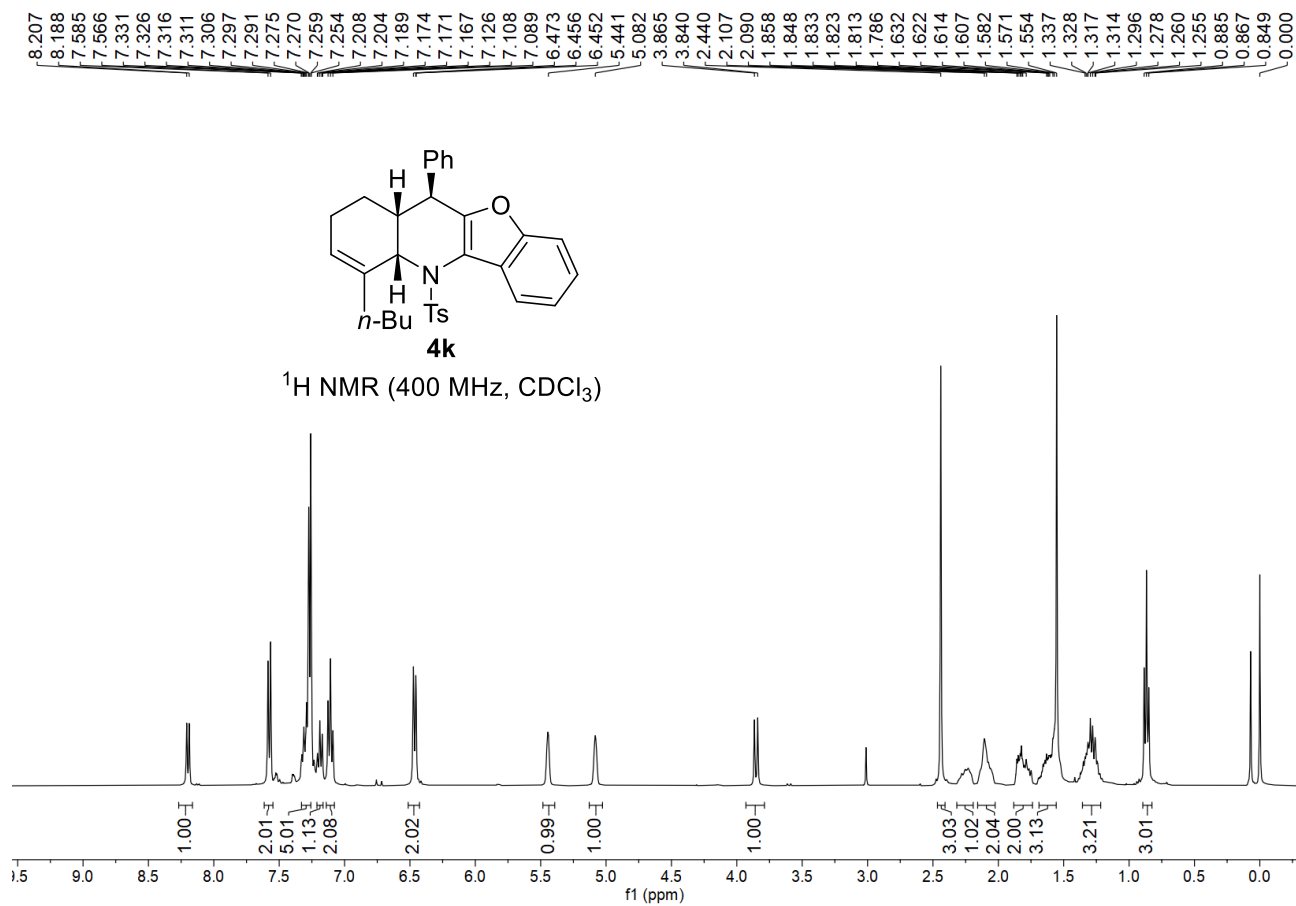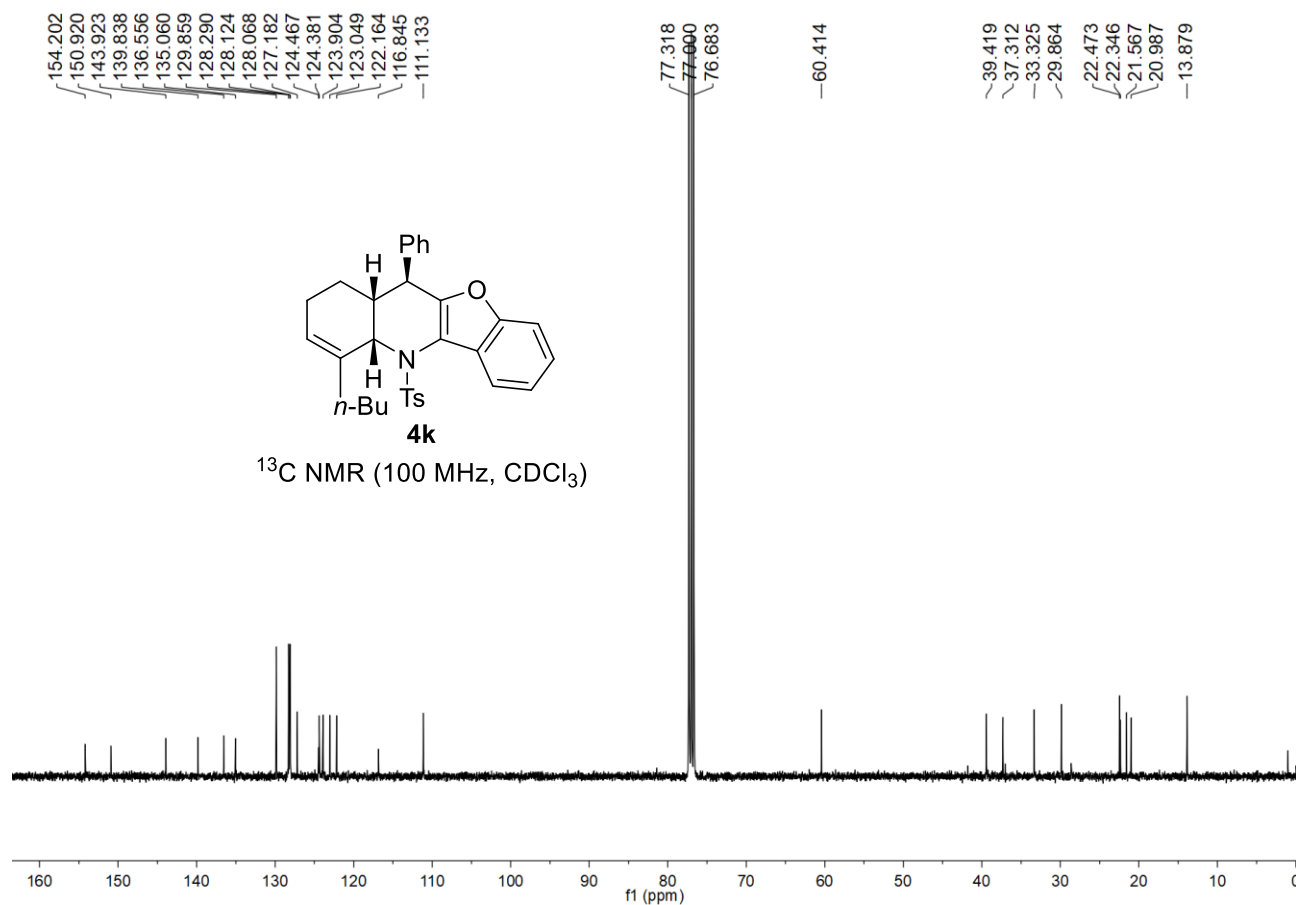

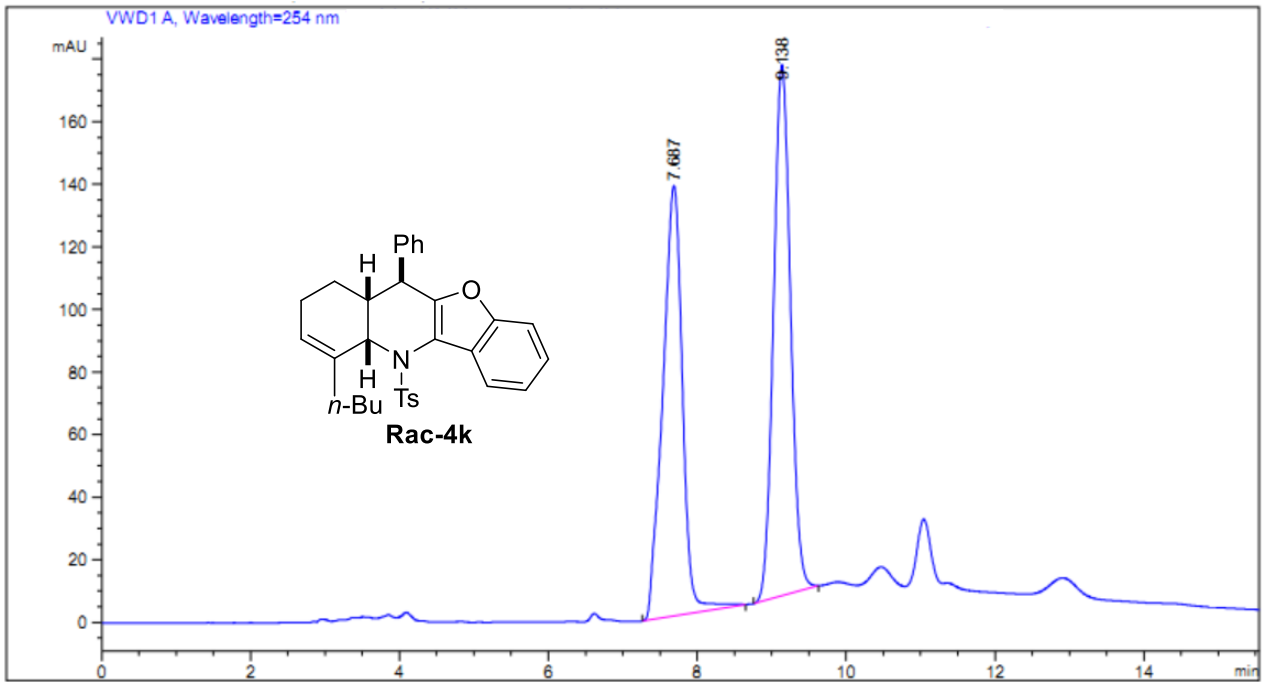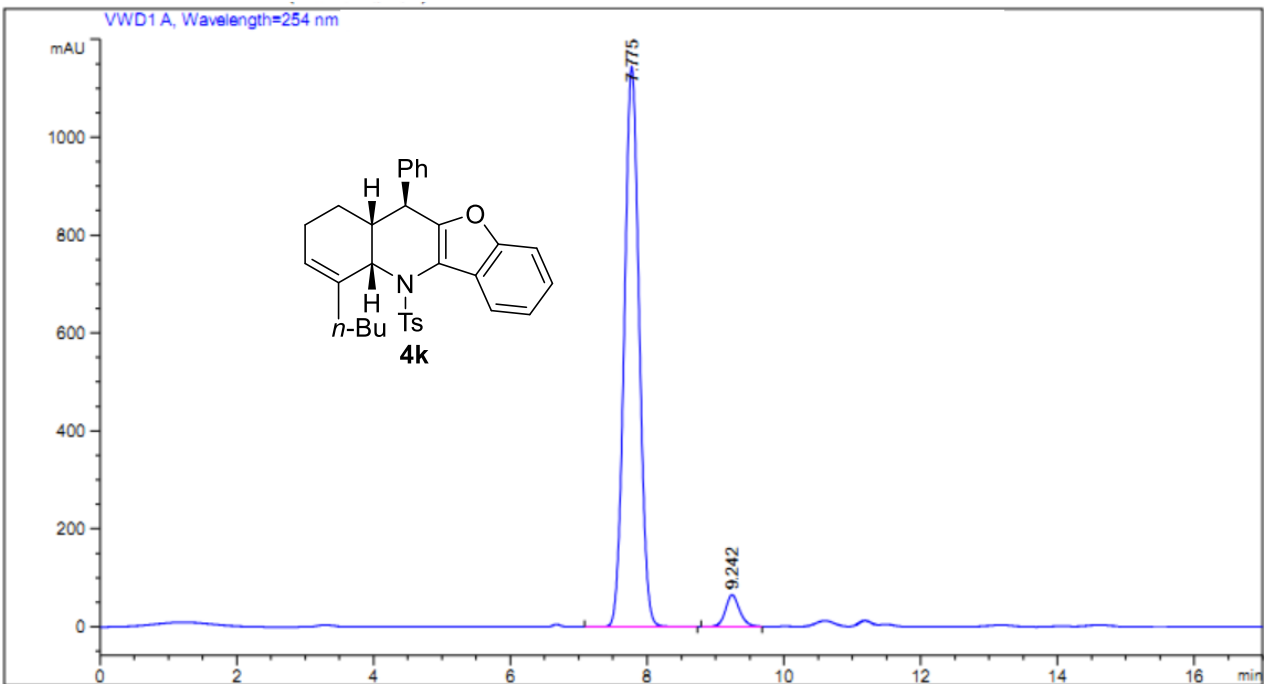

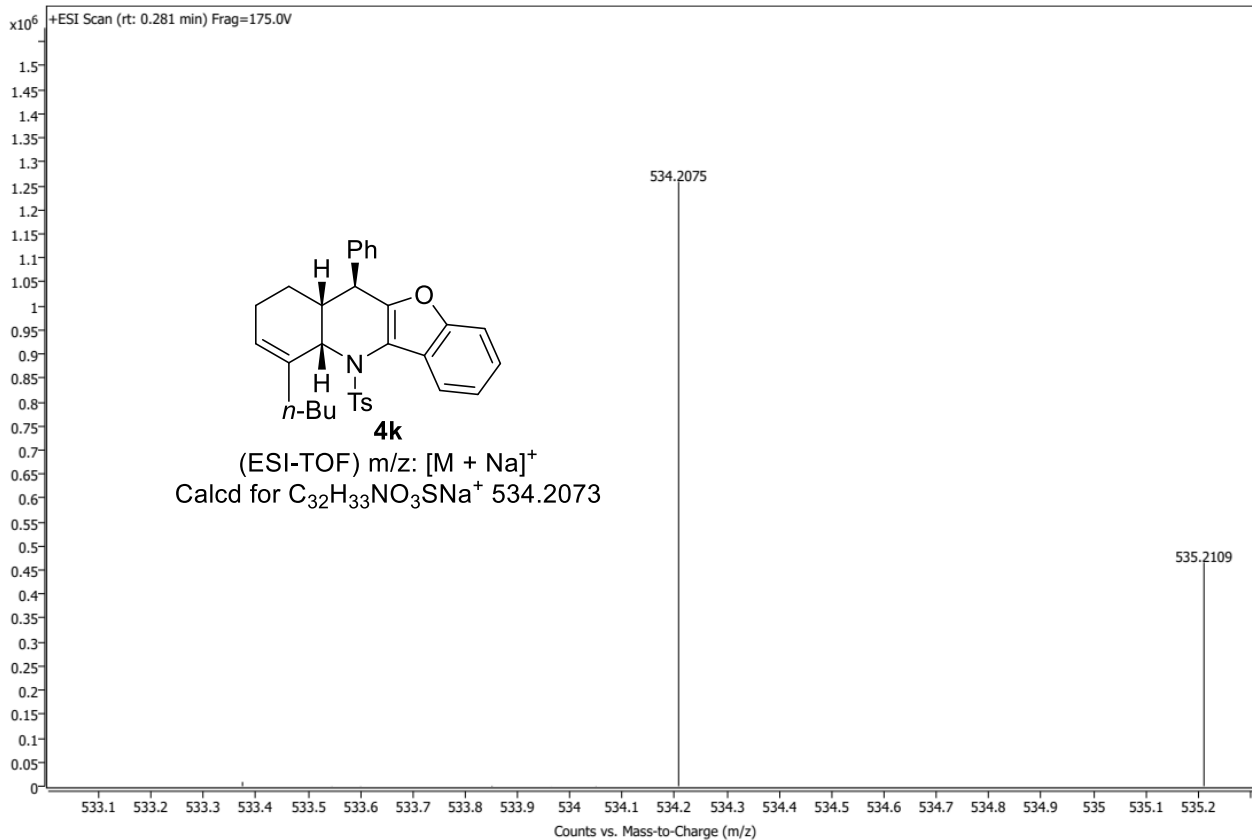

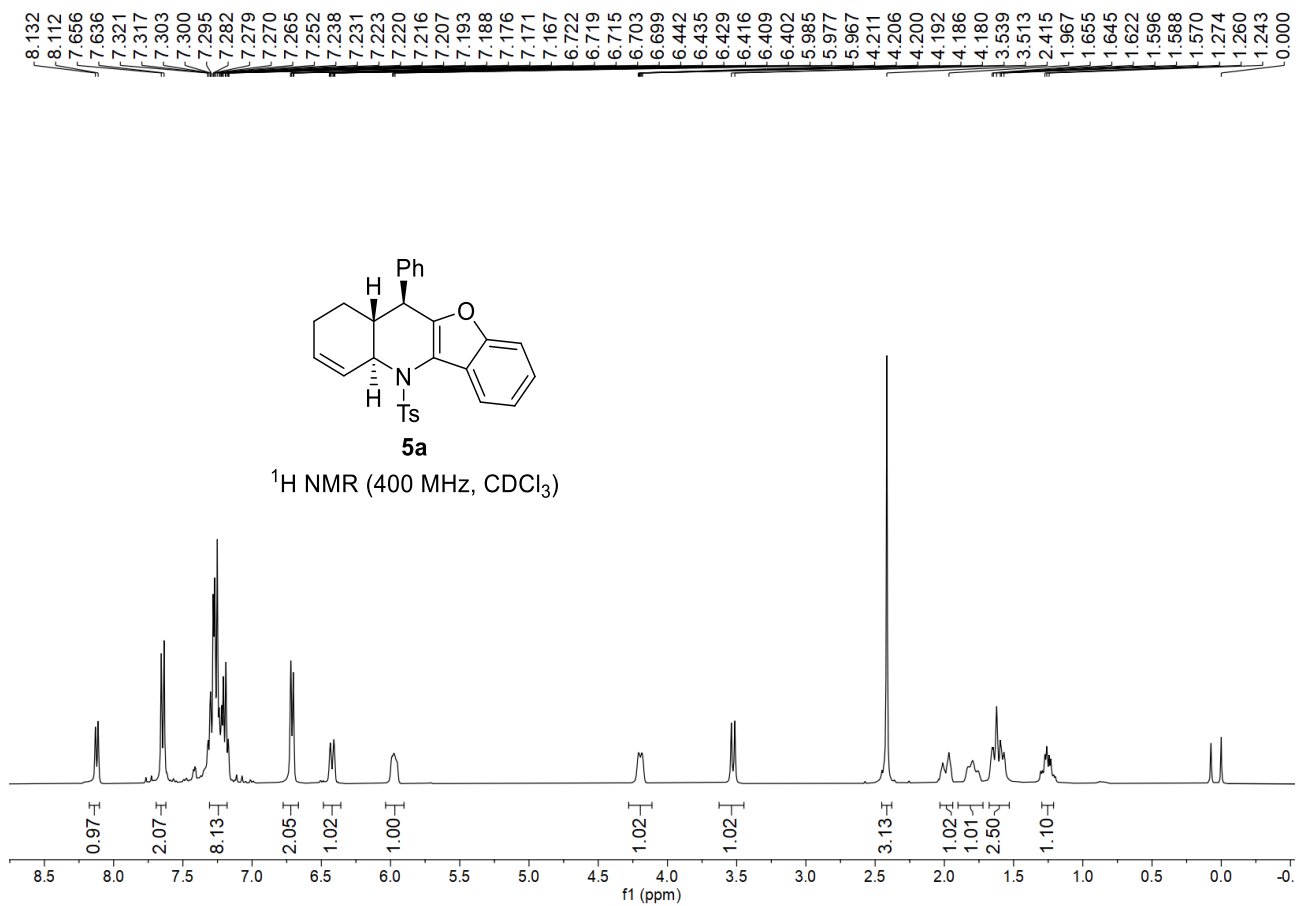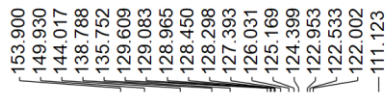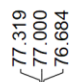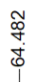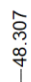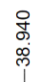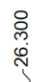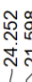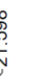



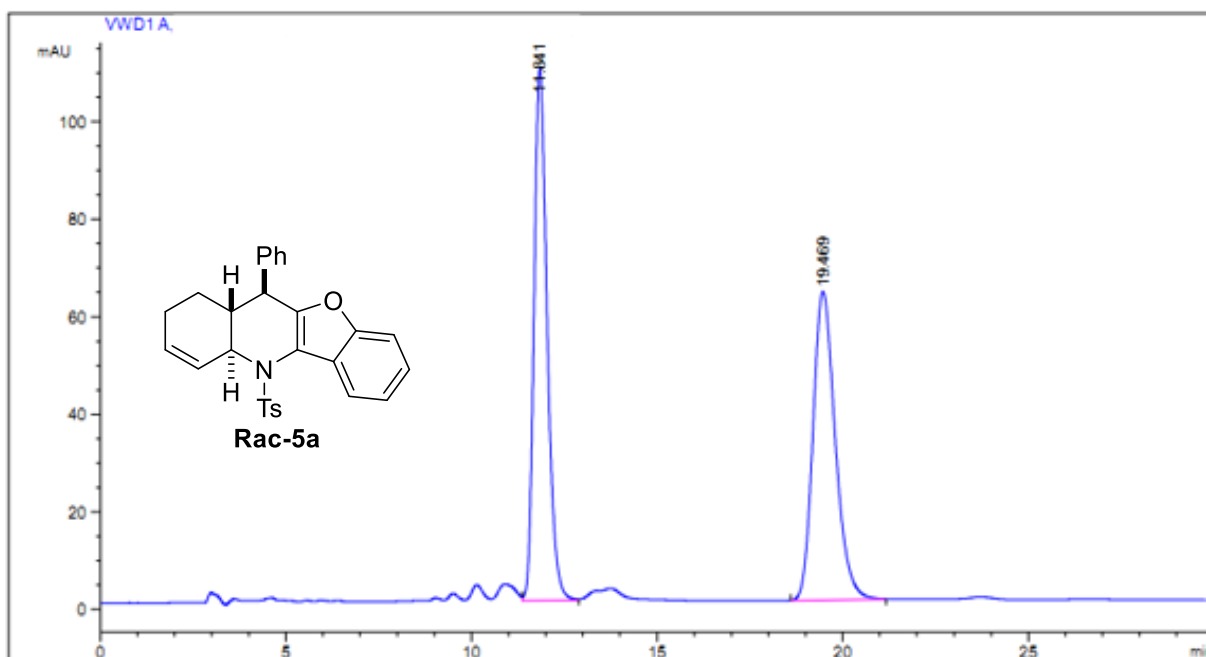

| # | [min]     | [min]  | mAU        | *s        | [mAU ]  | % |
|---|-----------|--------|------------|-----------|---------|---|
| 1 | 11.841 VV | 0.3804 | 2683.02319 | 108.97501 | 50.4386 |   |
| 2 | 19.469 BB | 0.6404 | 2636.35767 | 63.27567  | 49.5614 |   |

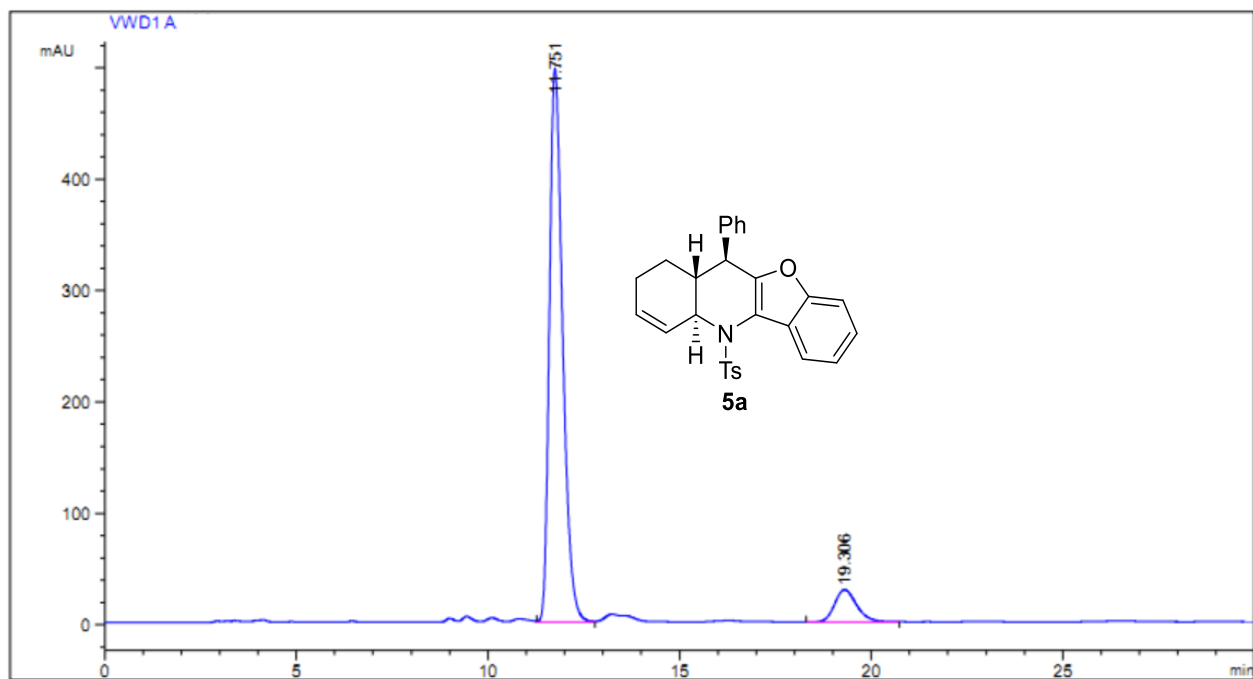

| # | [min]     | [min]  | mAU        | *s        | [mAU ]  | % |
|---|-----------|--------|------------|-----------|---------|---|
| 1 | 11.751 VV | 0.3670 | 1.19035e4  | 496.57968 | 91.1792 |   |
| 2 | 19.306 VB | 0.6106 | 1151.56470 | 28.89340  | 8.8208  |   |

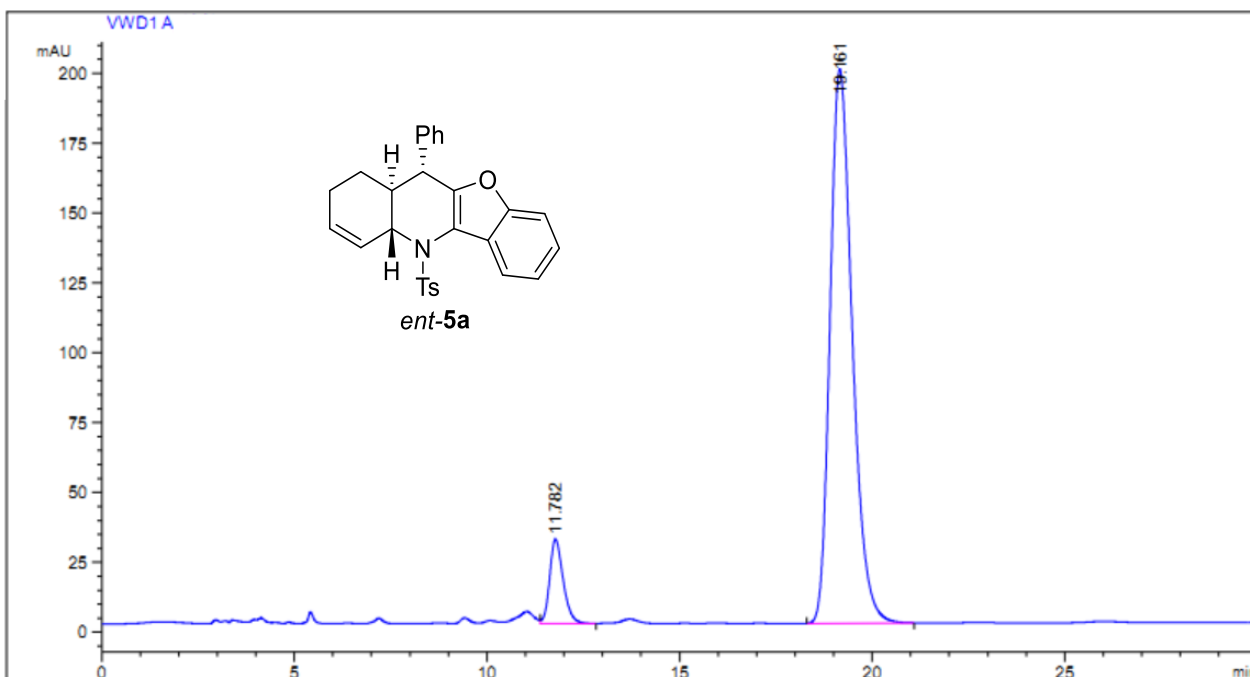

| # | [min]     | [min]  | mAU        | *s        | [mAU]   | % |
|---|-----------|--------|------------|-----------|---------|---|
| 1 | 11.782 VB | 0.3732 | 740.02606  | 30.20142  | 8.5200  |   |
| 2 | 19.161 BB | 0.6161 | 7945.75879 | 198.24857 | 91.4800 |   |

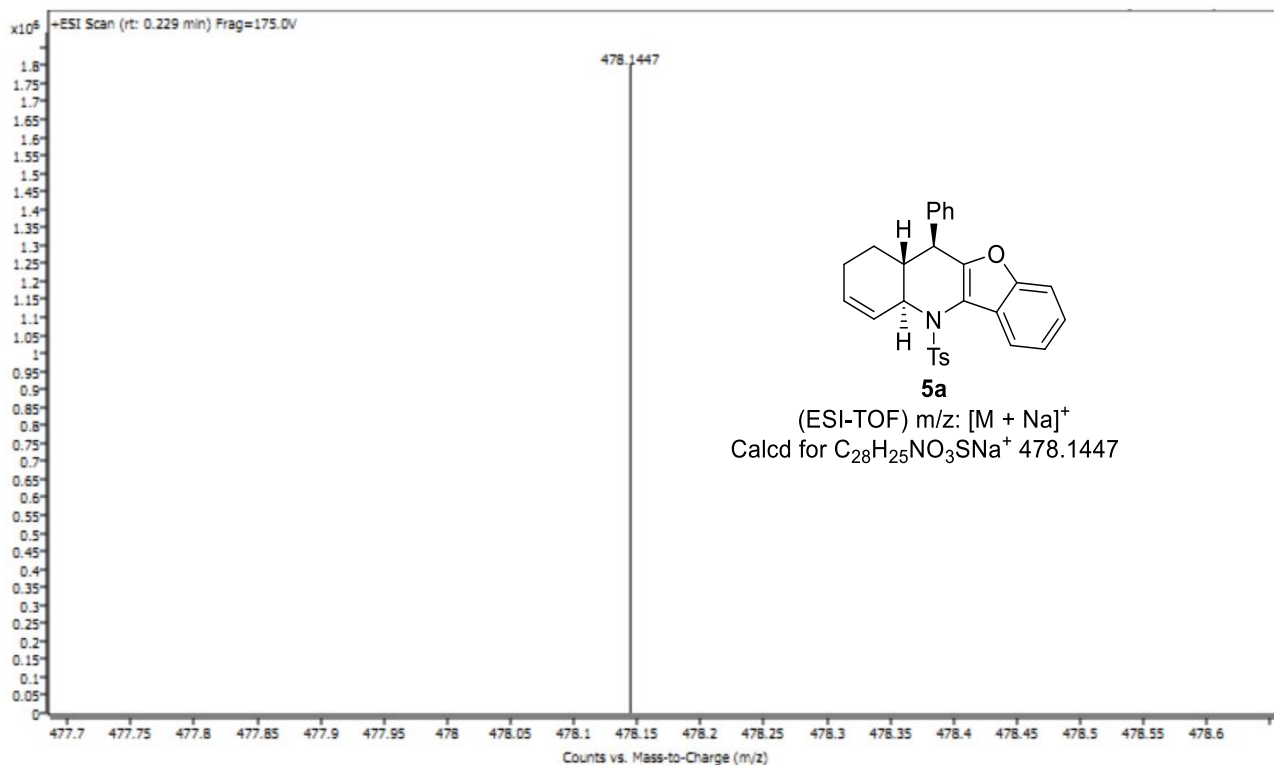

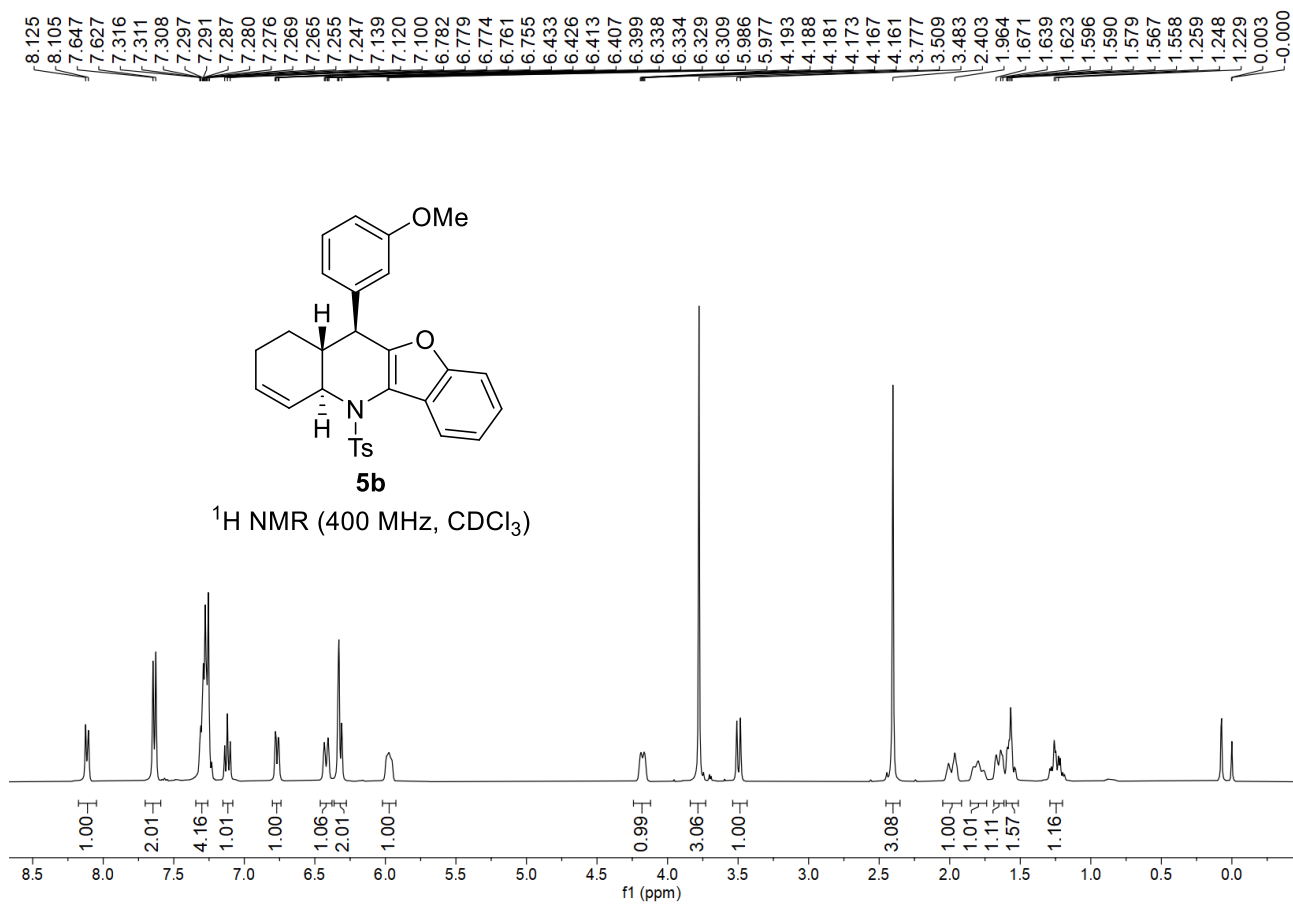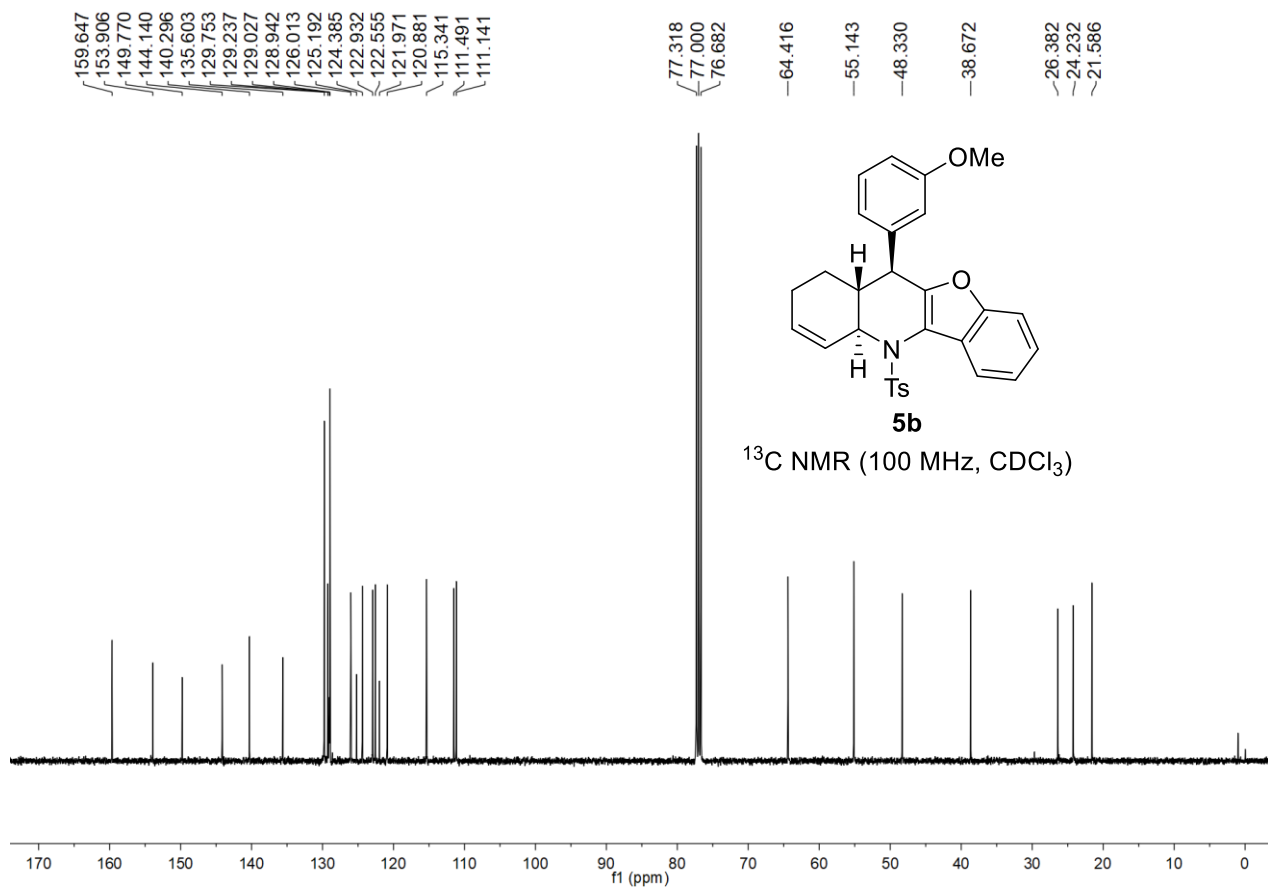

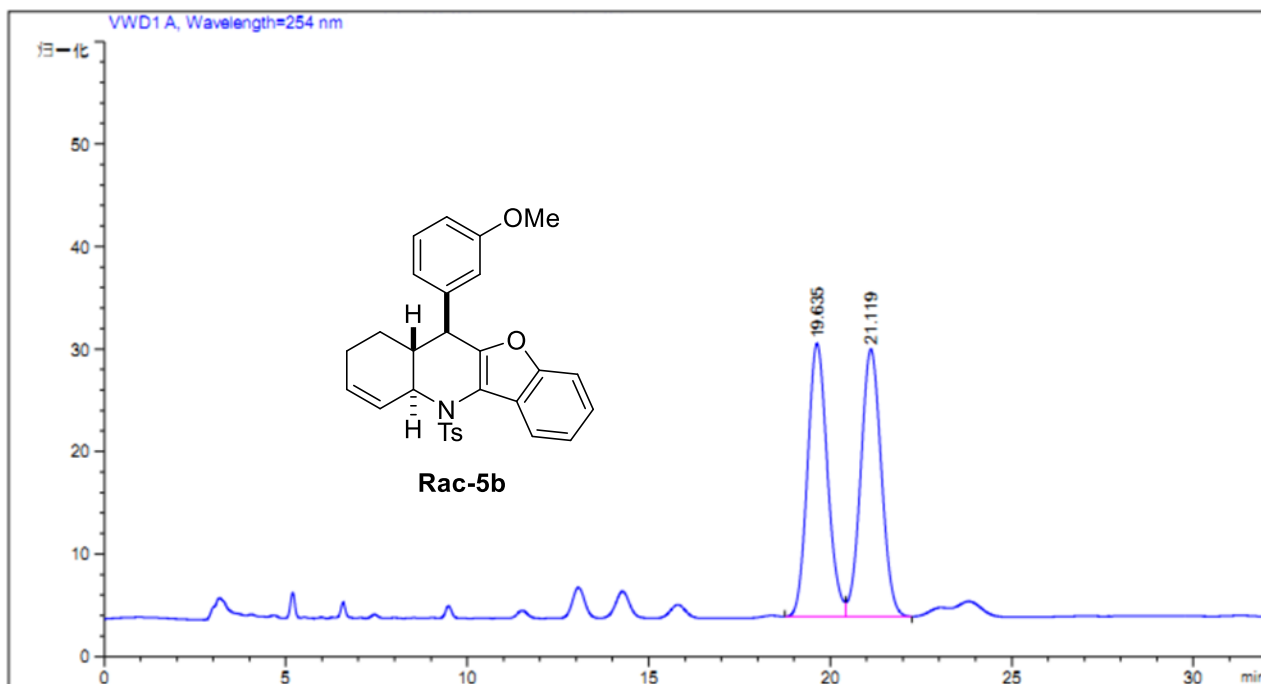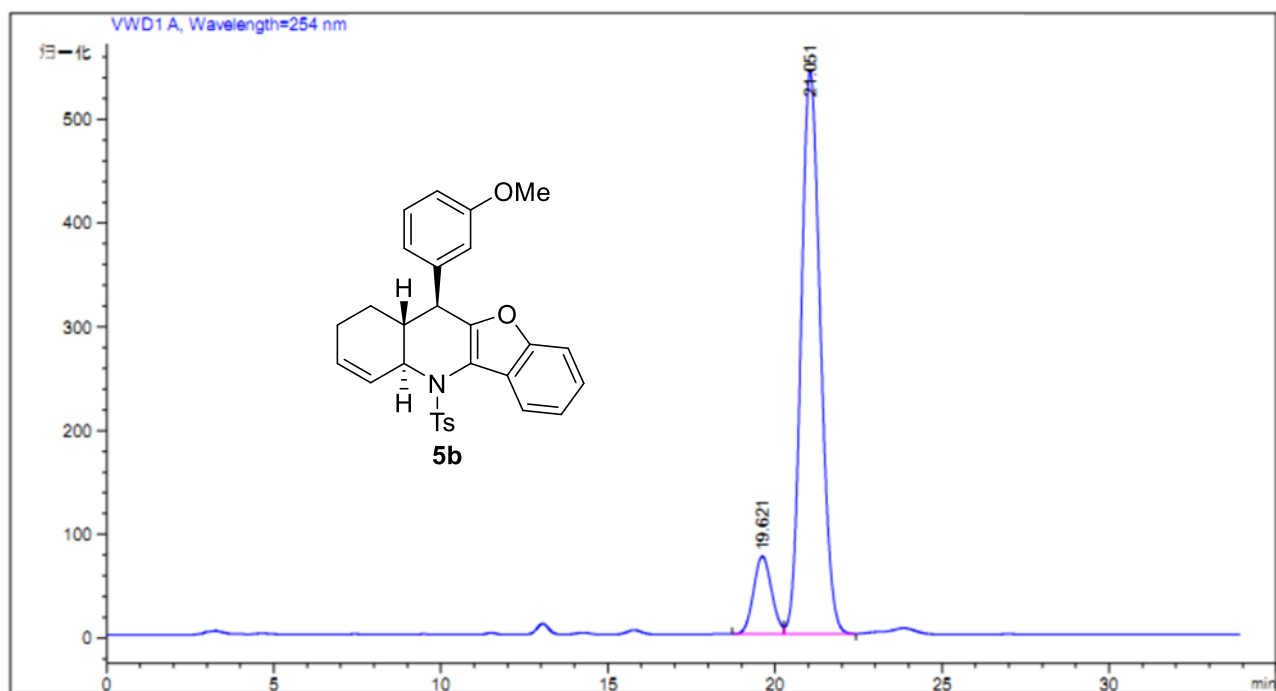

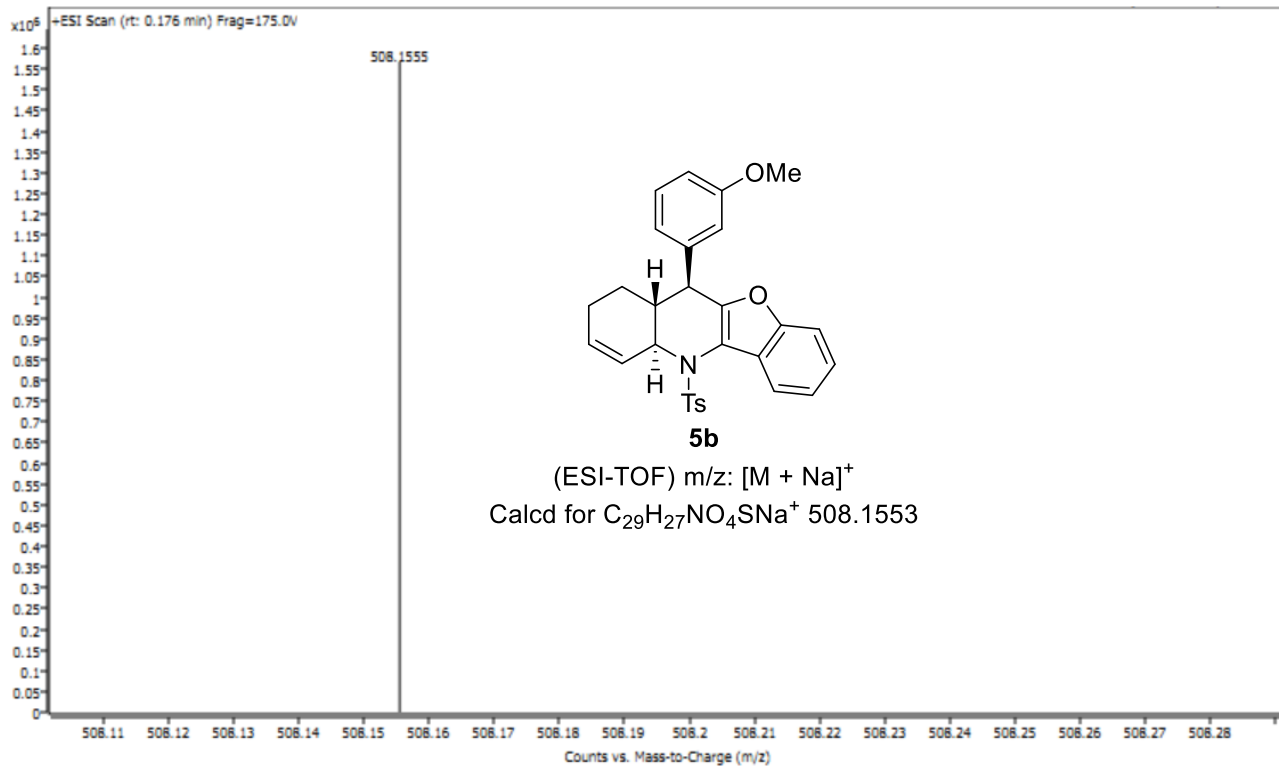

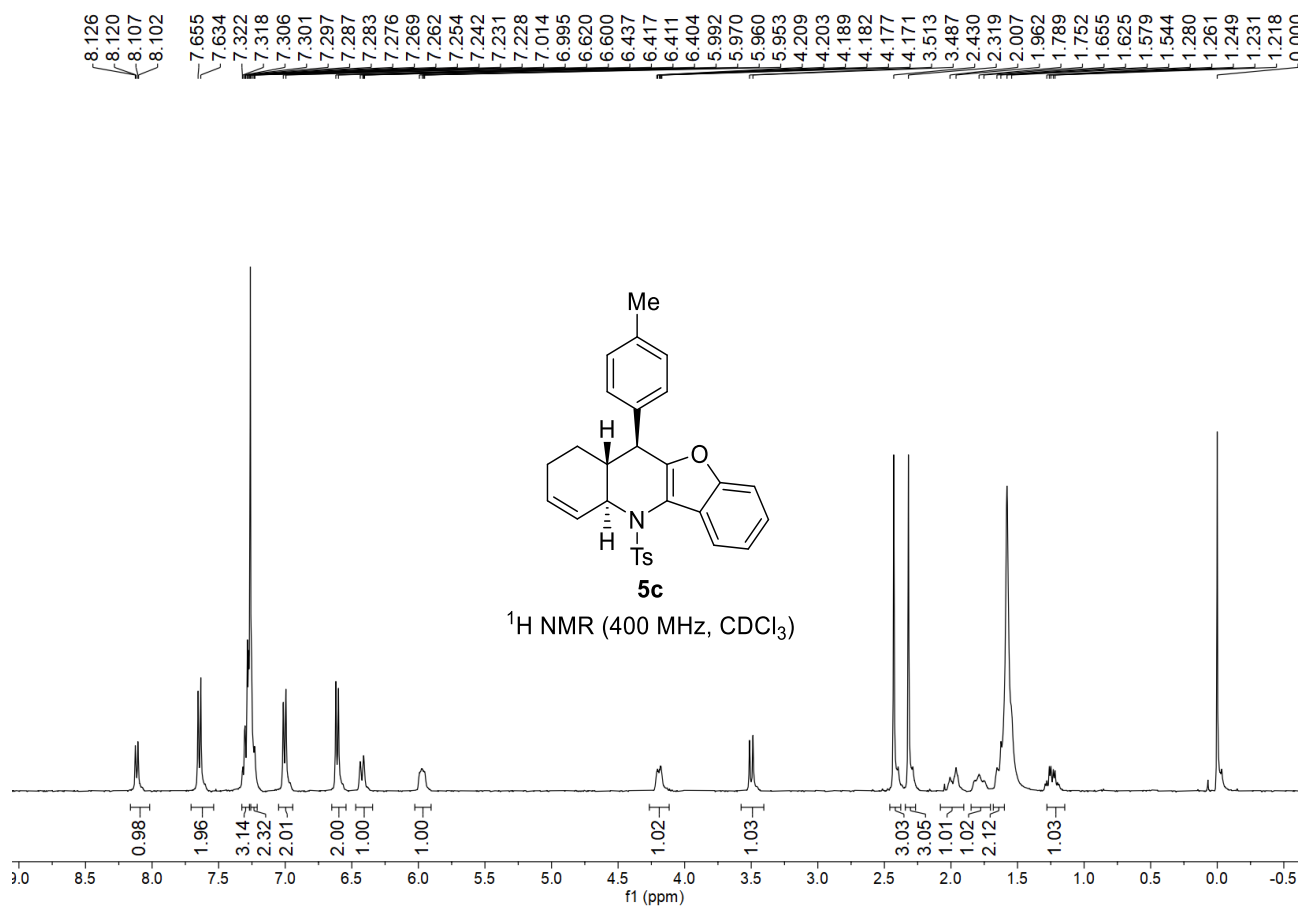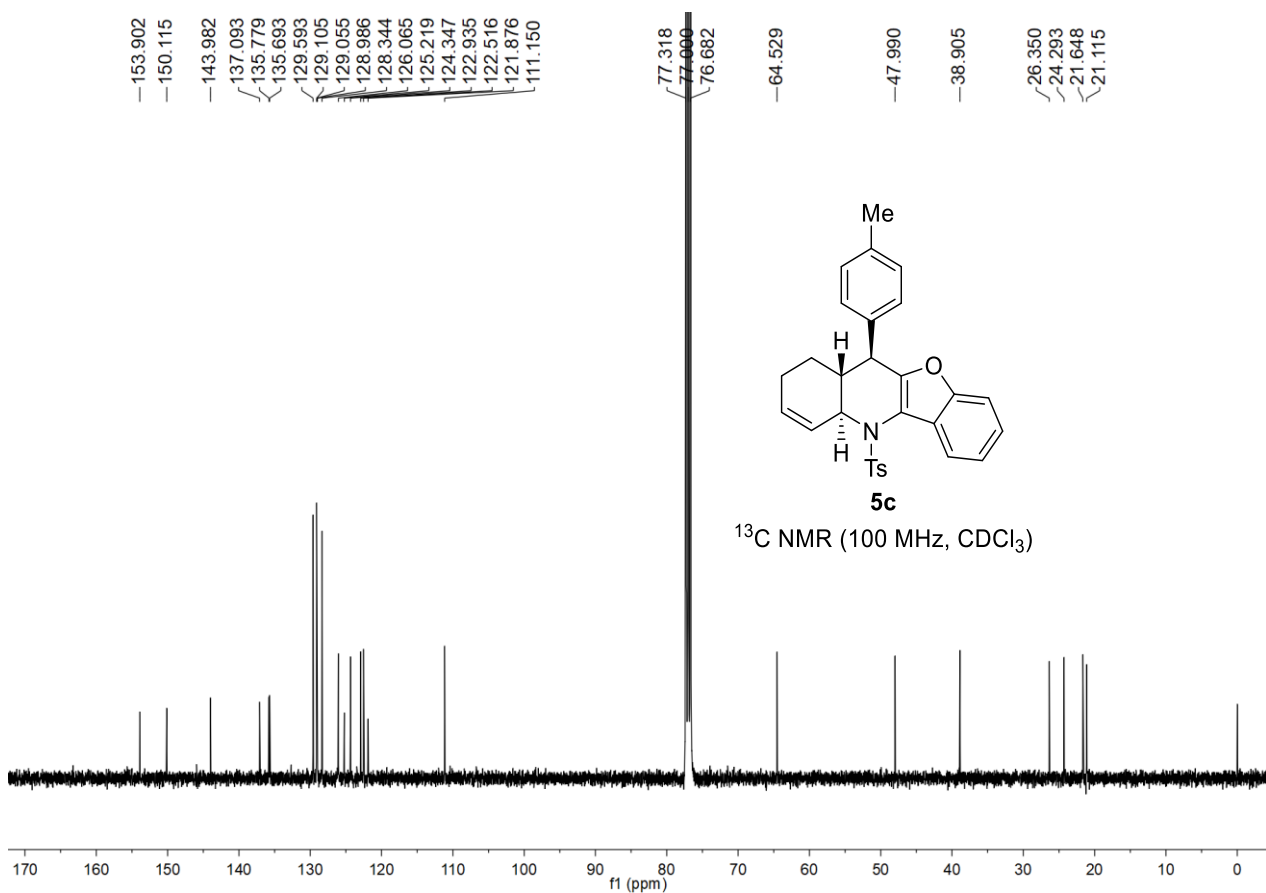

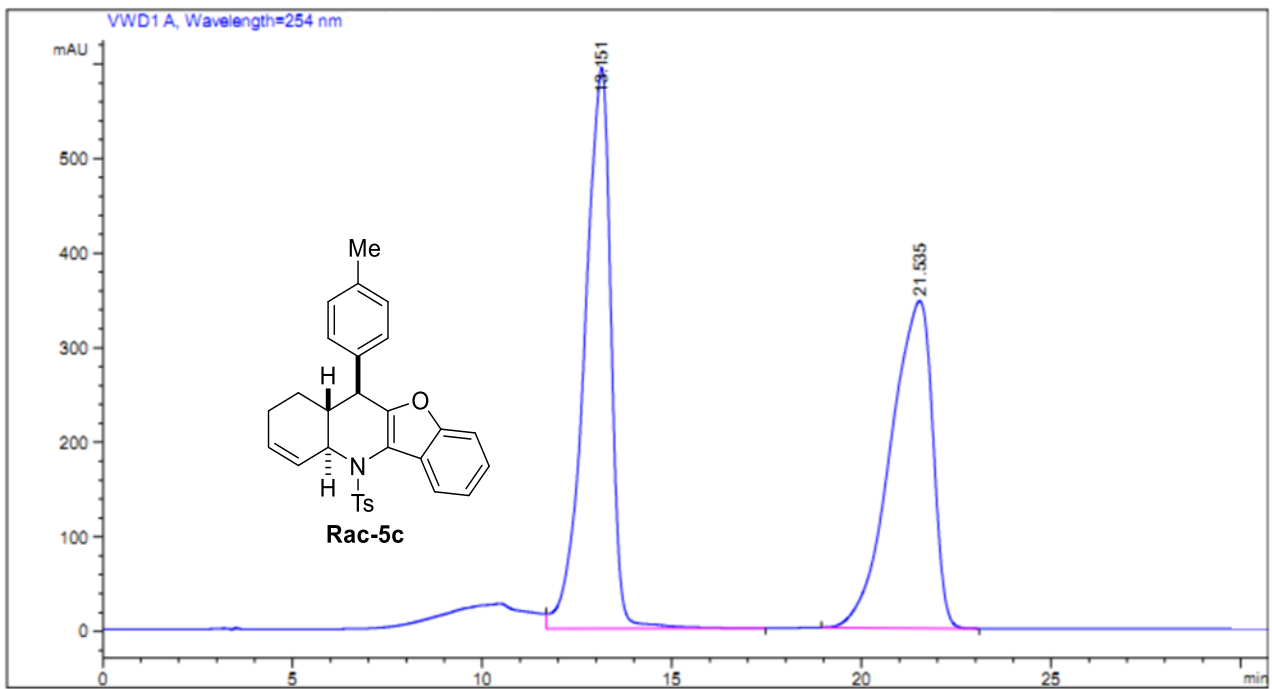

| # | [min]     | [min]  | [mAU*s]   | [mAU]     | %       |
|---|-----------|--------|-----------|-----------|---------|
| 1 | 13.151 VB | 0.7670 | 2.88403e4 | 592.89081 | 51.8688 |
| 2 | 21.535 BB | 1.1689 | 2.67621e4 | 345.97769 | 48.1312 |

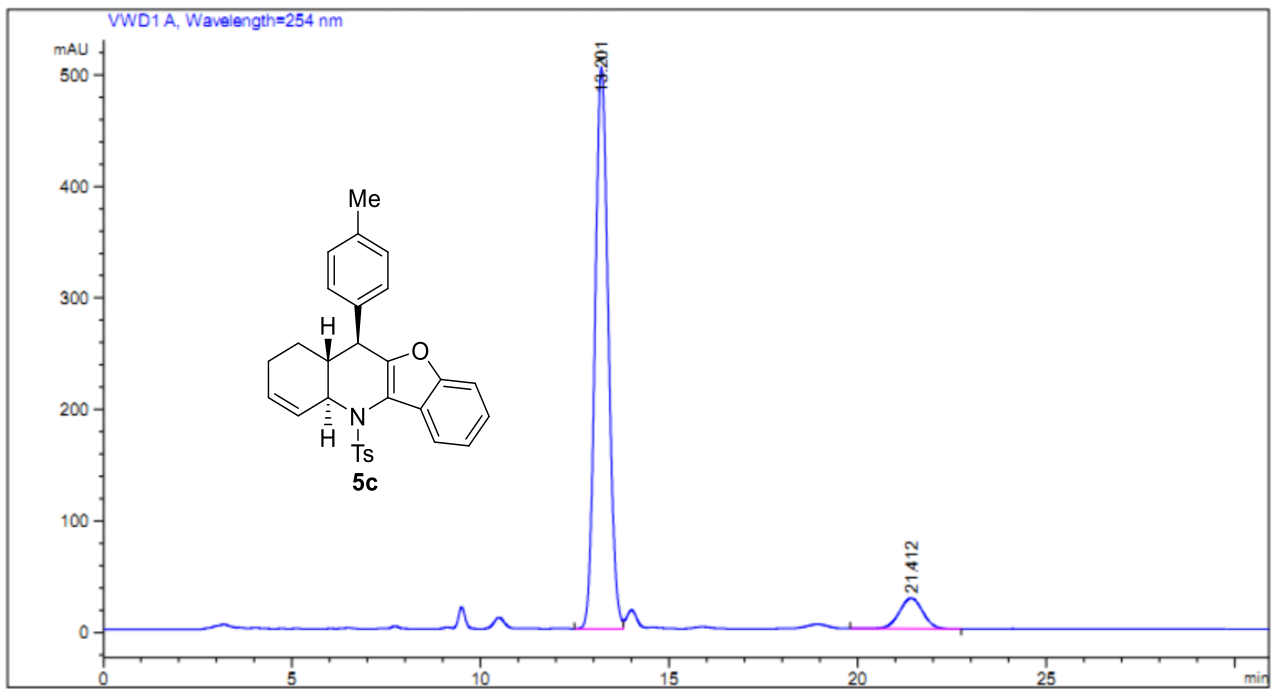

| # | [min]     | [min]  | [mAU*s]    | [mAU]     | %       |
|---|-----------|--------|------------|-----------|---------|
| 1 | 13.201 BV | 0.3814 | 1.23008e4  | 502.99823 | 91.1729 |
| 2 | 21.412 BB | 0.6764 | 1190.93762 | 27.53836  | 8.8271  |

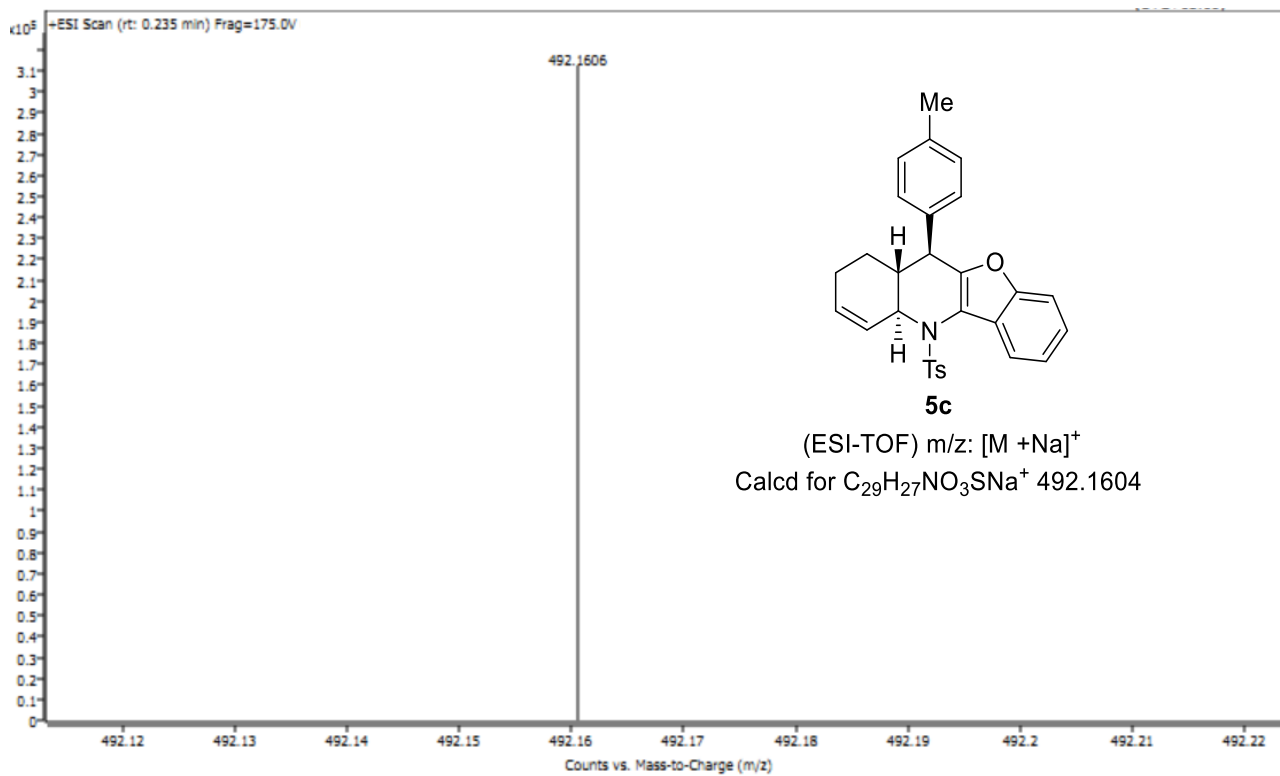



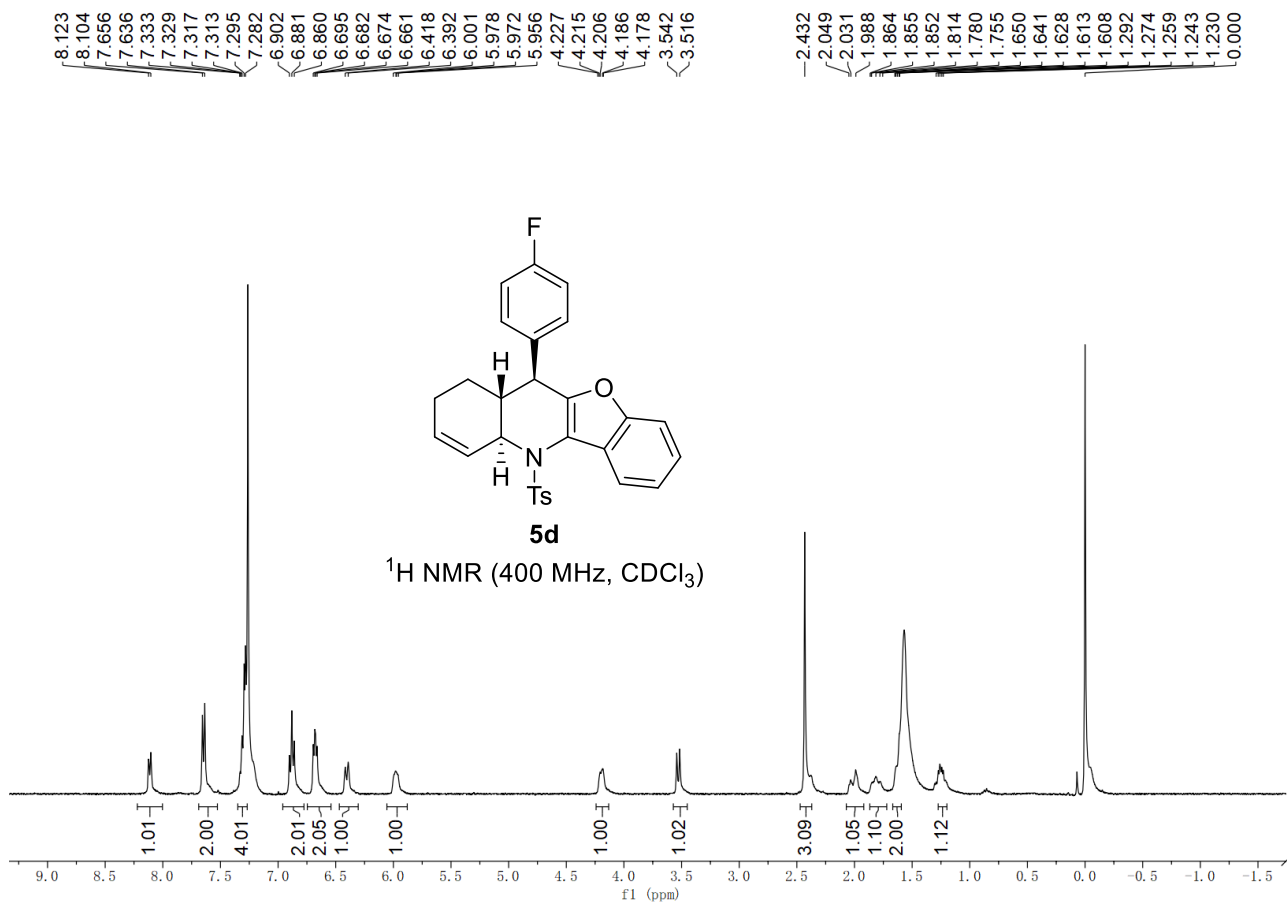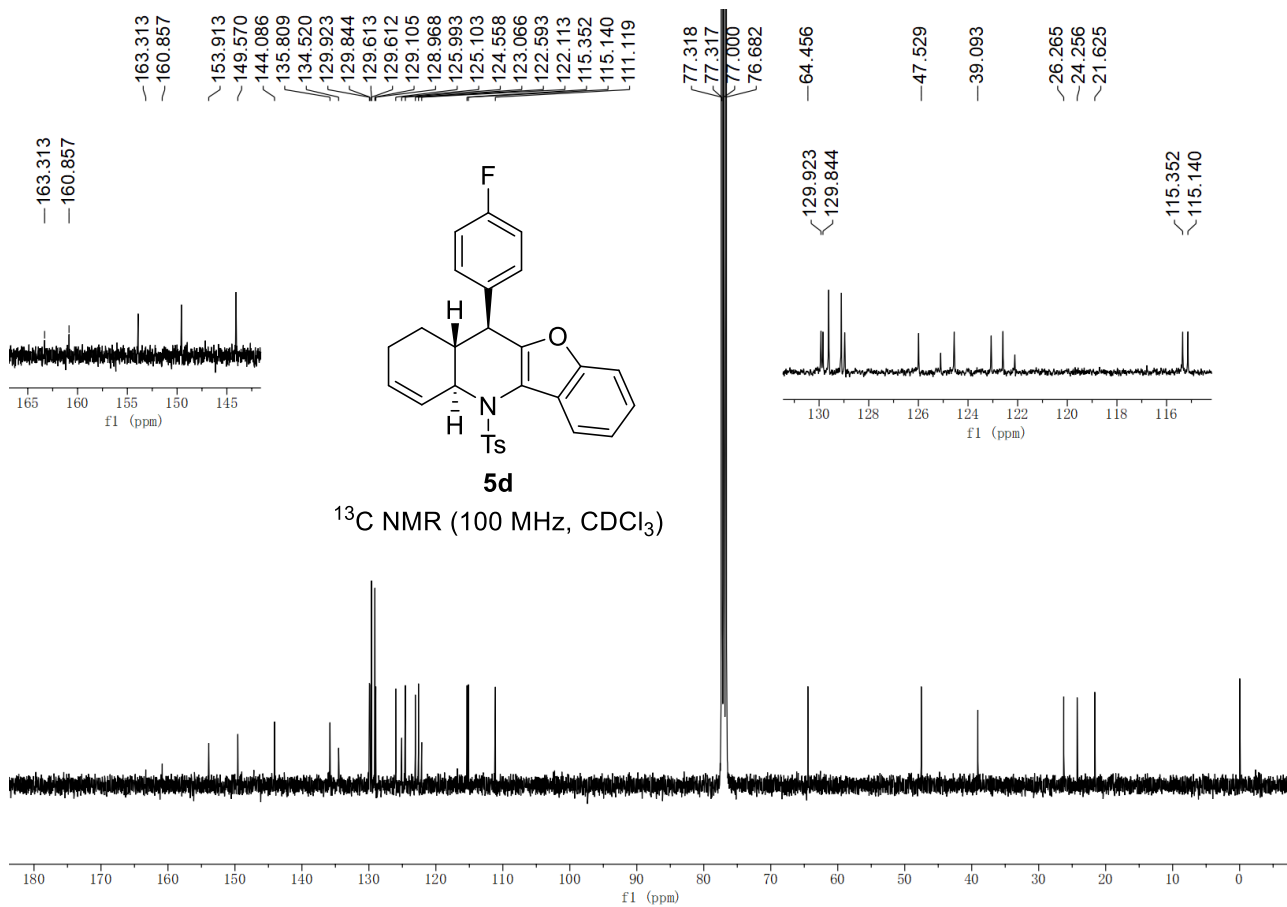

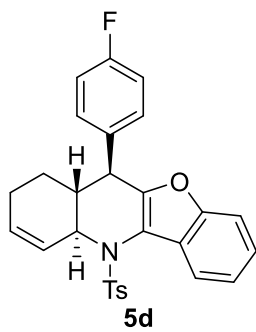

<sup>19</sup>F NMR (375 MHz, CDCl<sub>3</sub>)

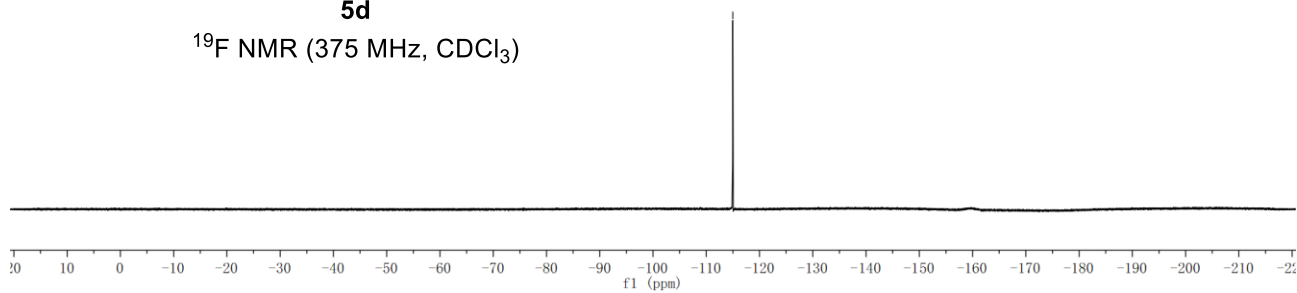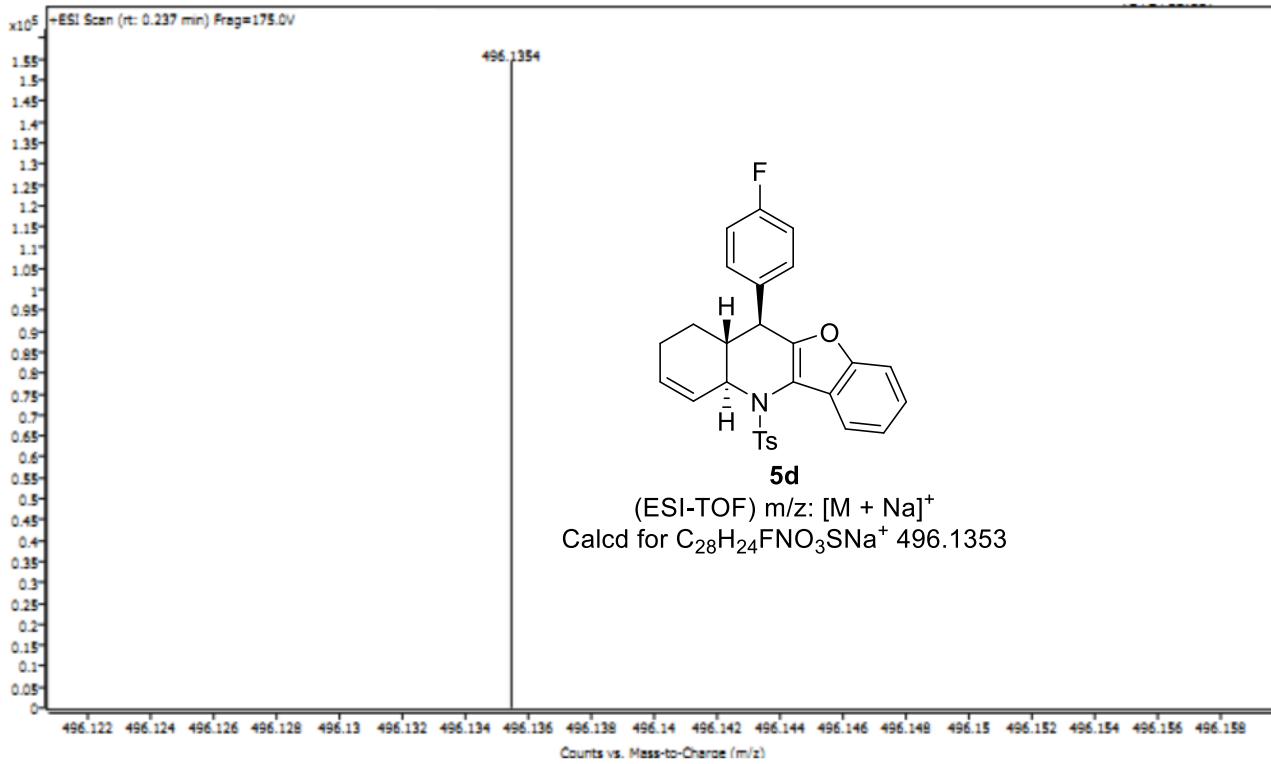

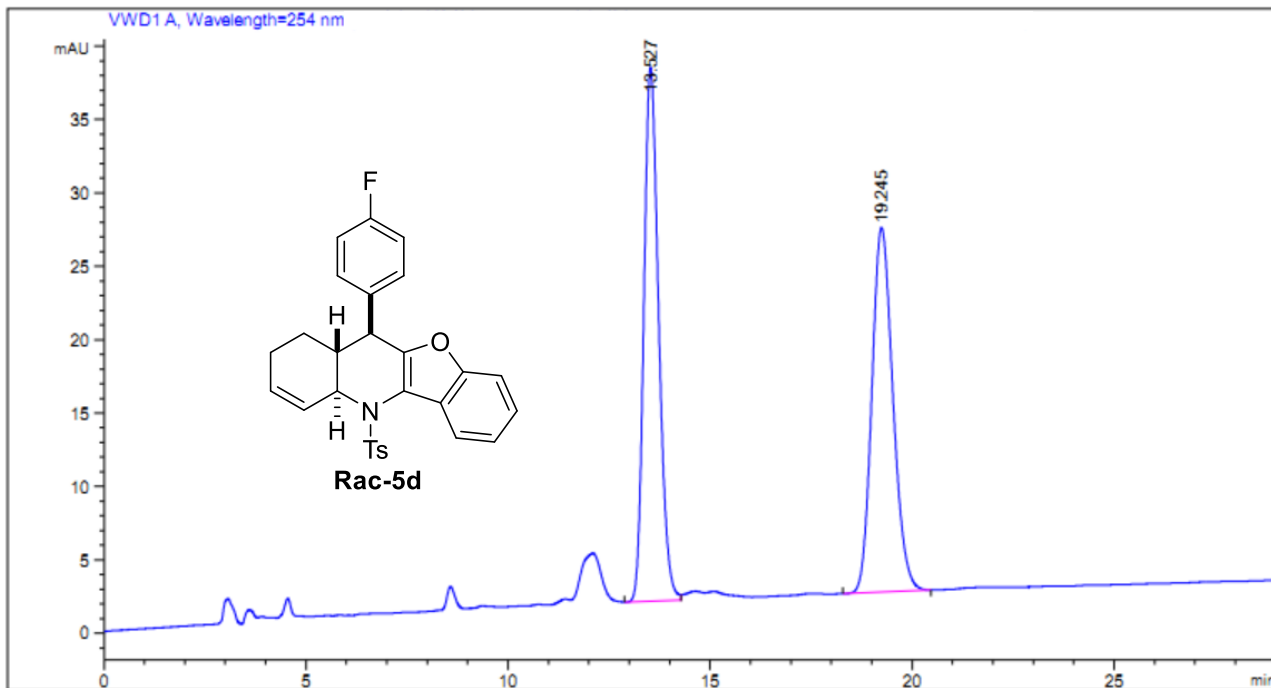

| # | [min]  | [min] | [mAU*s] | [mAU]     | %        |         |
|---|--------|-------|---------|-----------|----------|---------|
| 1 | 13.527 | BV    | 0.3923  | 923.65717 | 36.37949 | 50.6615 |
| 2 | 19.245 | BB    | 0.5595  | 899.53528 | 24.83106 | 49.3385 |

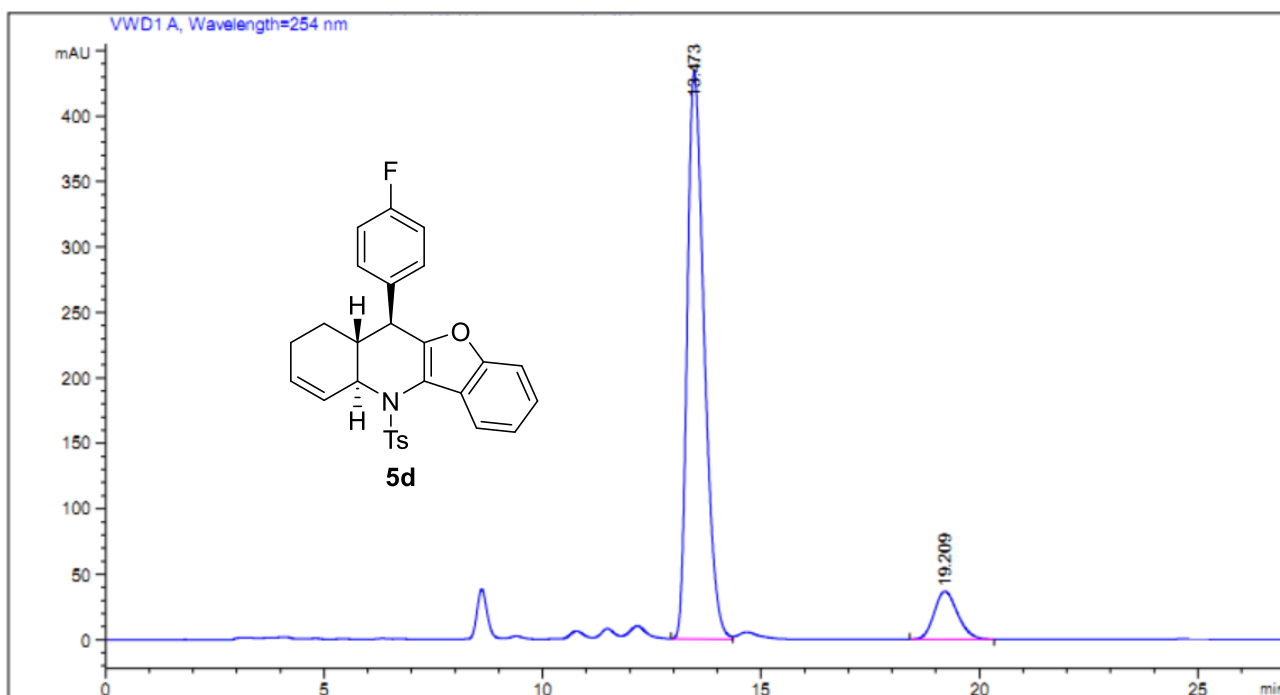

| # | [min]  | [min] | [mAU*s] | [mAU]      | %         |         |
|---|--------|-------|---------|------------|-----------|---------|
| 1 | 13.473 | BV    | 0.4199  | 1.16948e4  | 433.10706 | 89.5814 |
| 2 | 19.209 | BB    | 0.5723  | 1360.13989 | 36.68816  | 10.4186 |

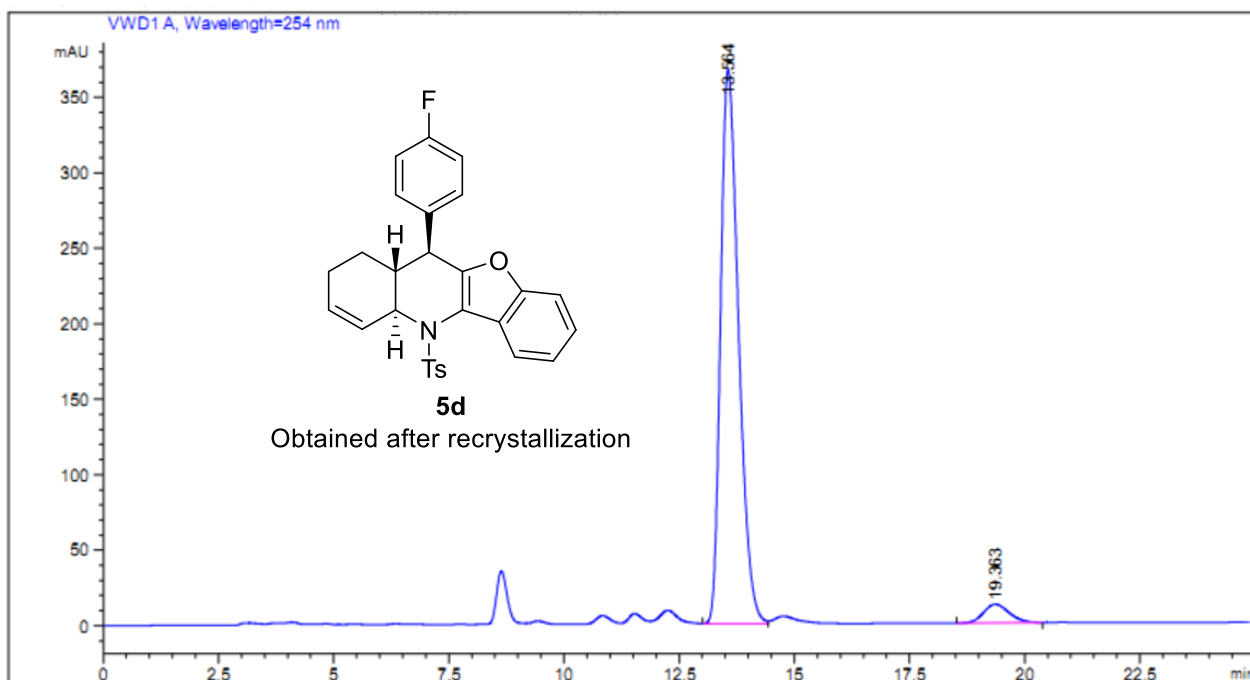

| # | [min]  | [min] | [min]  | [mAU*s]    | [mAU]     | %       |
|---|--------|-------|--------|------------|-----------|---------|
| 1 | 13.564 | BV    | 0.4205 | 9921.04980 | 366.71774 | 95.3080 |
| 2 | 19.363 | VV    | 0.6040 | 488.41245  | 12.43148  | 4.6920  |

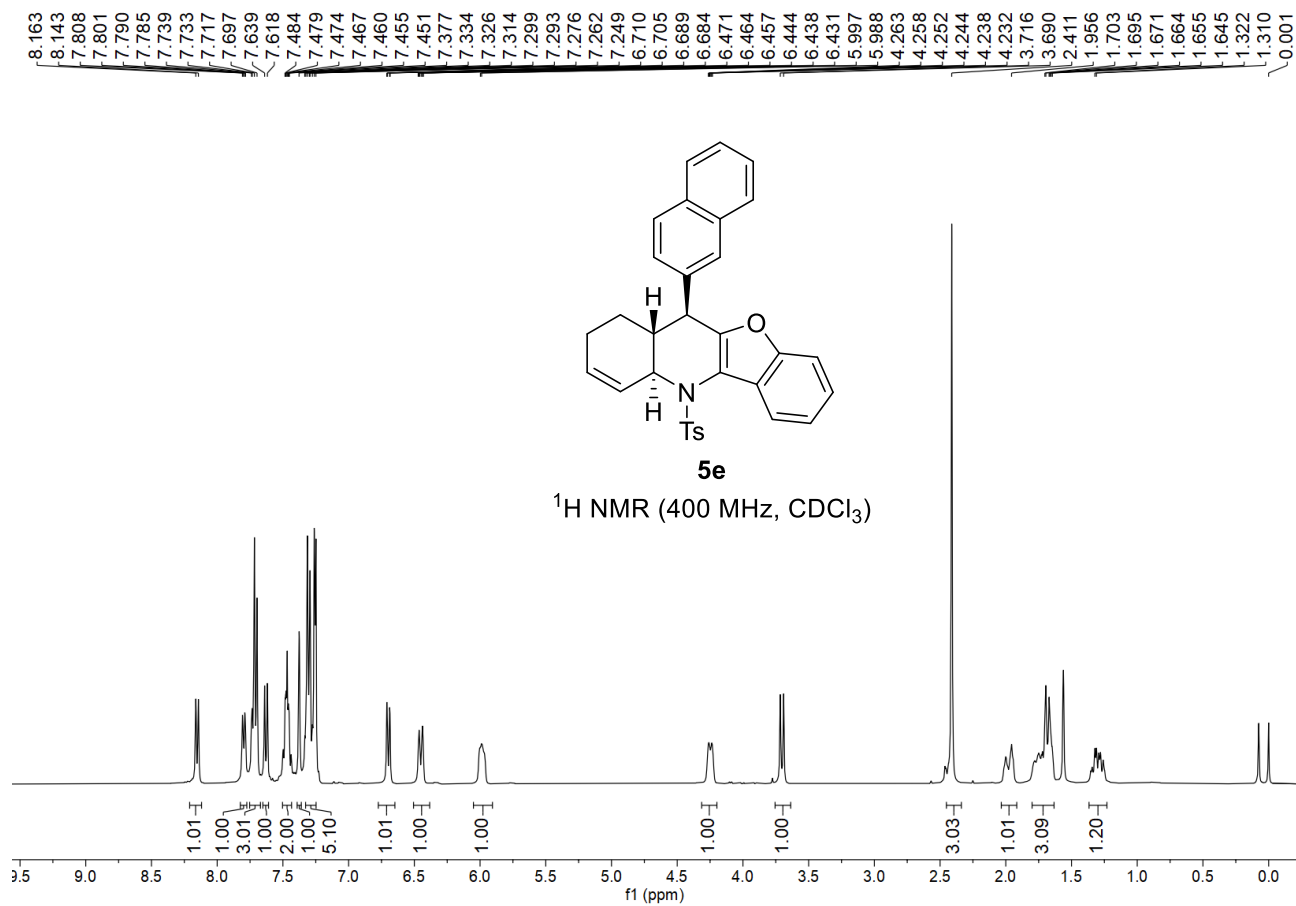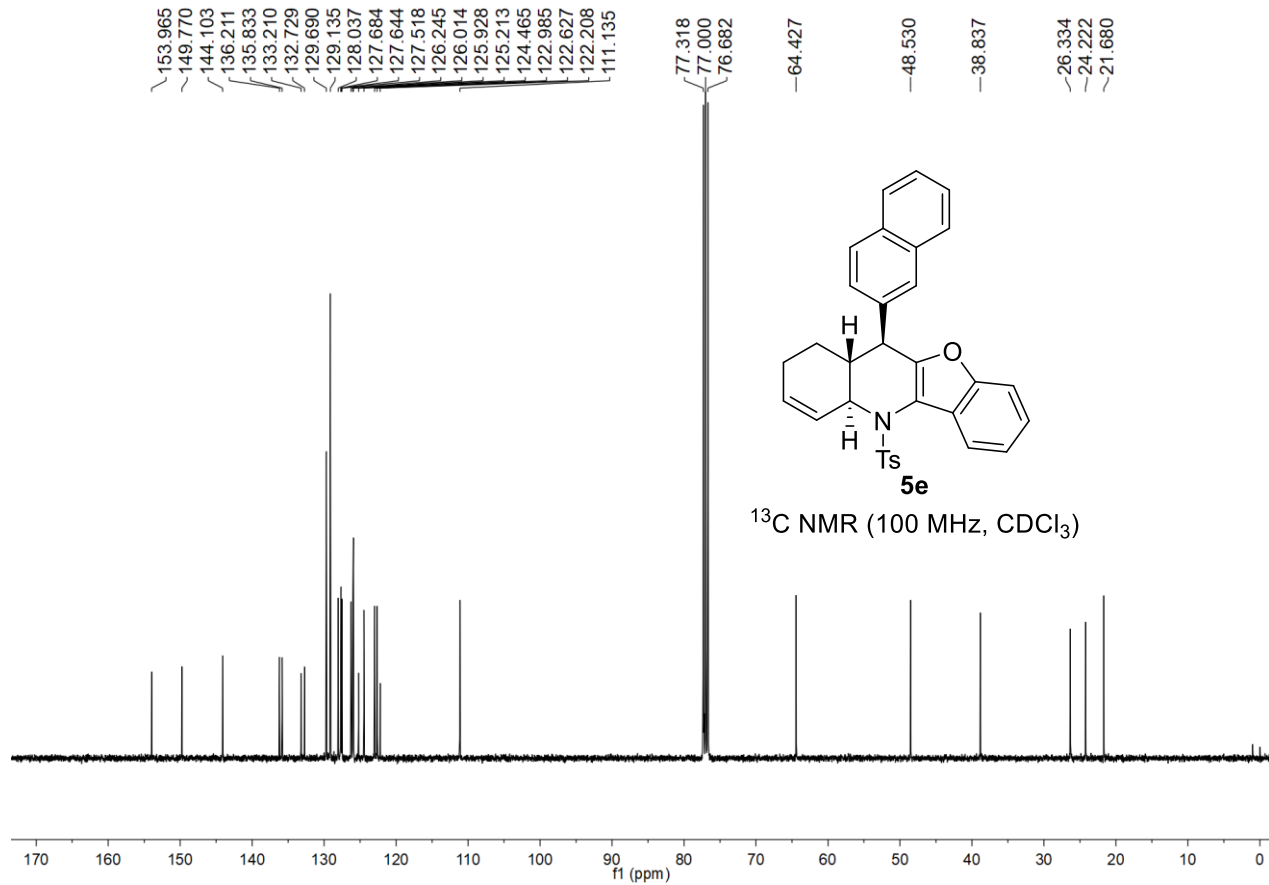

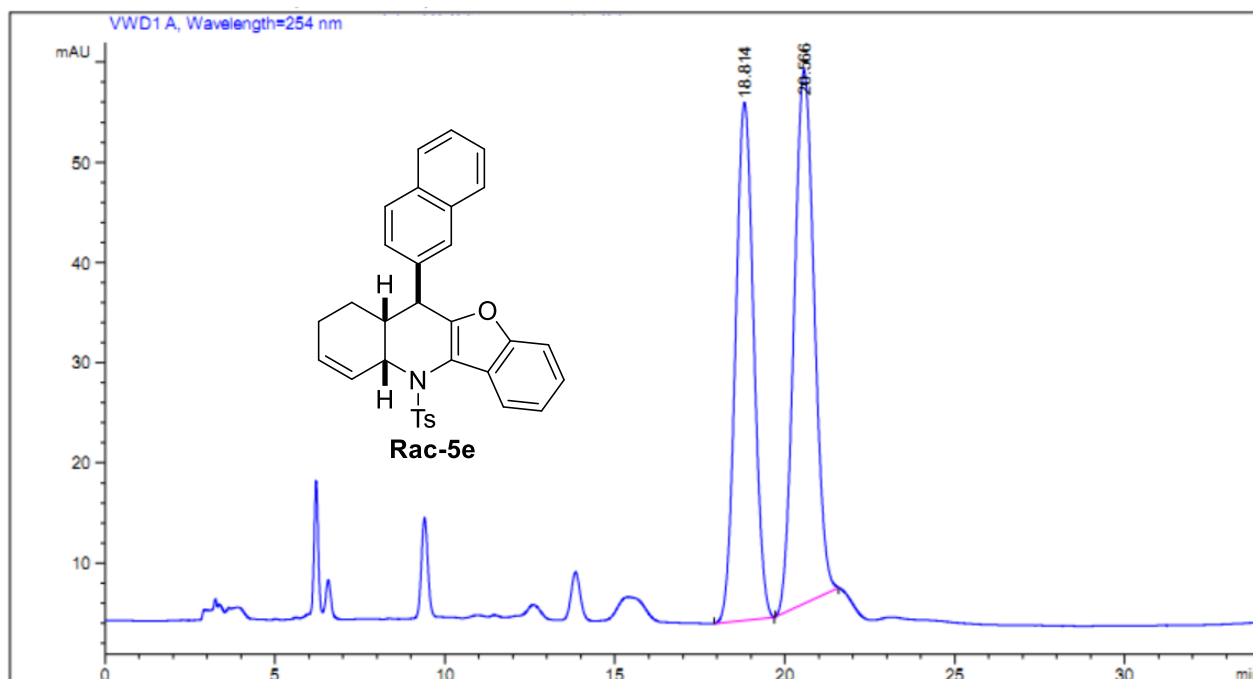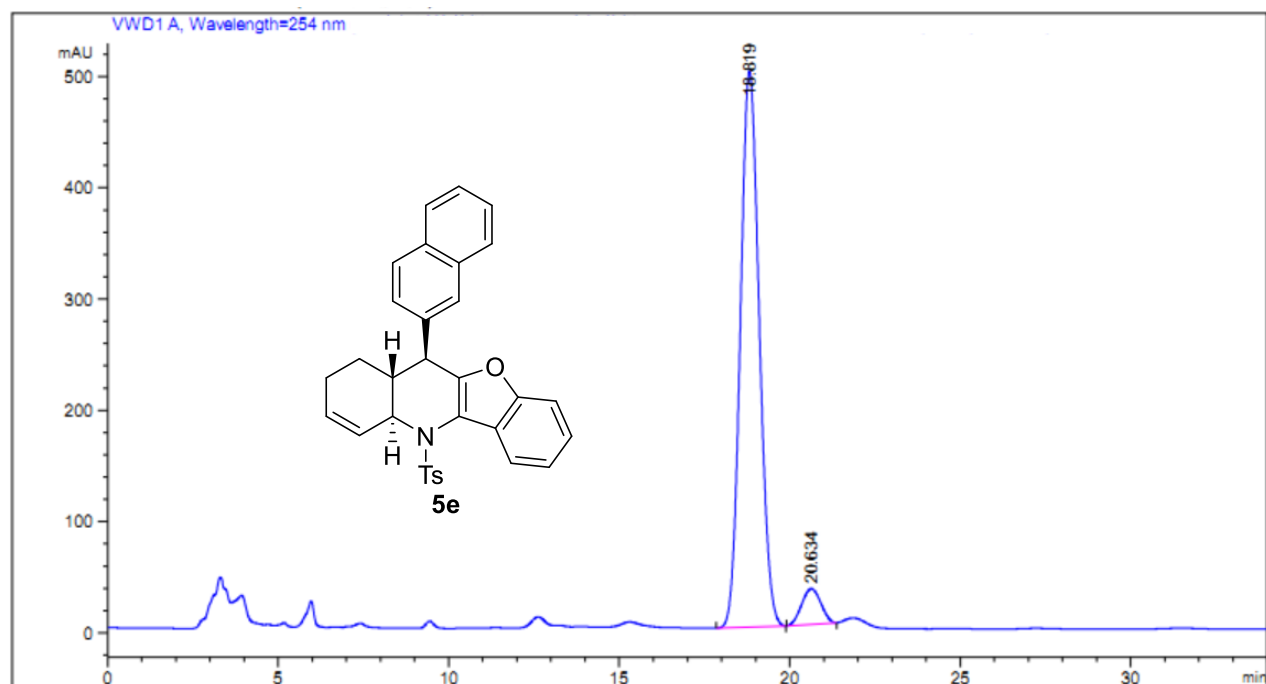

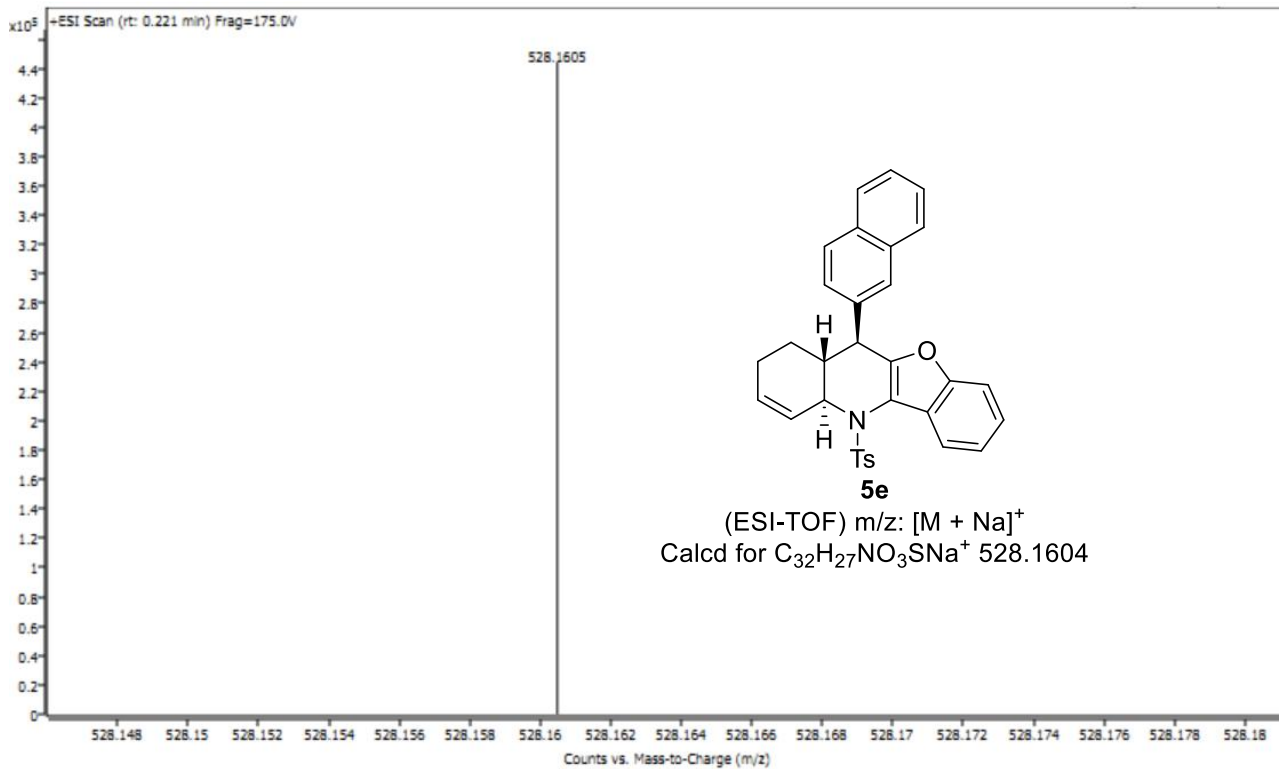

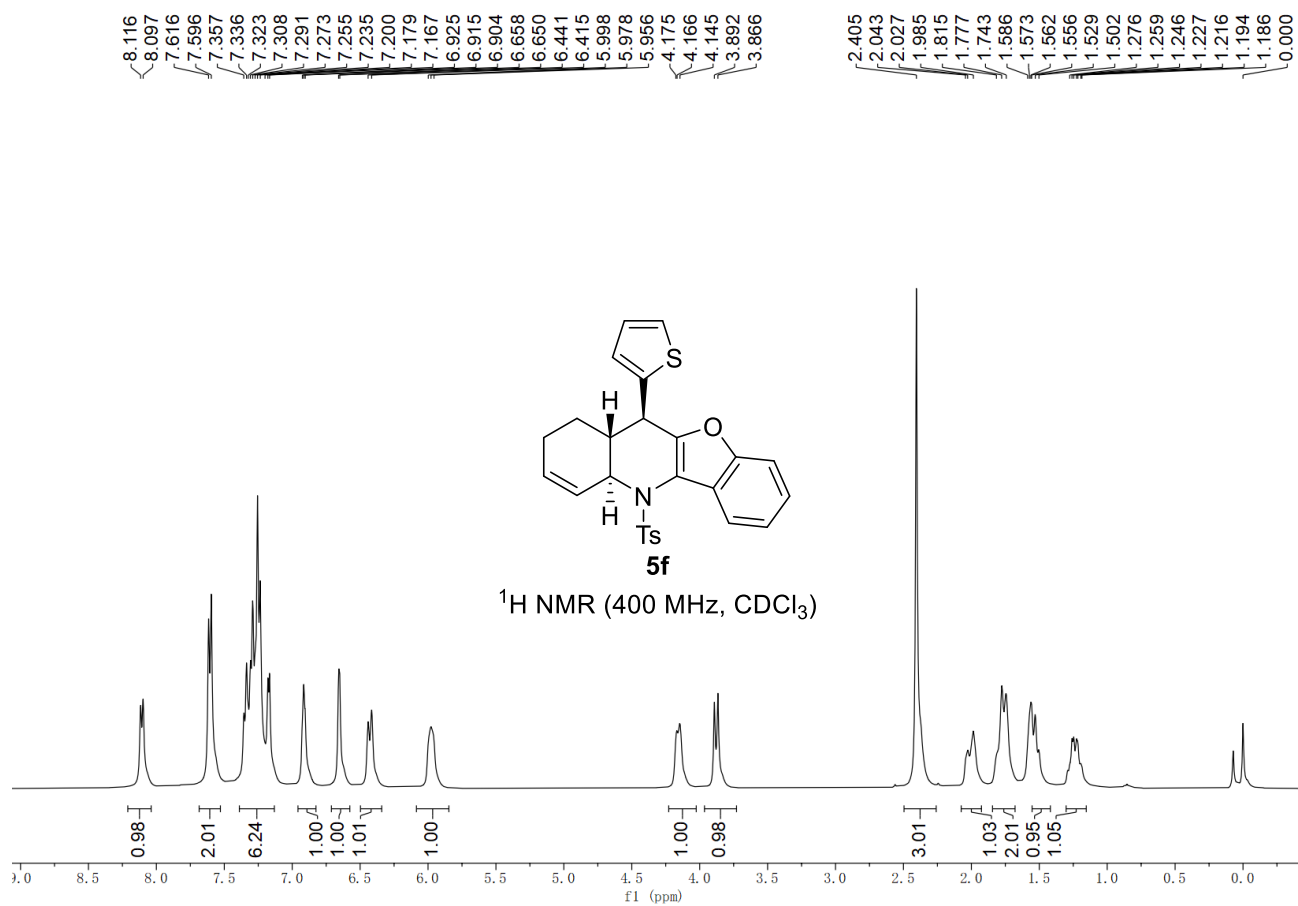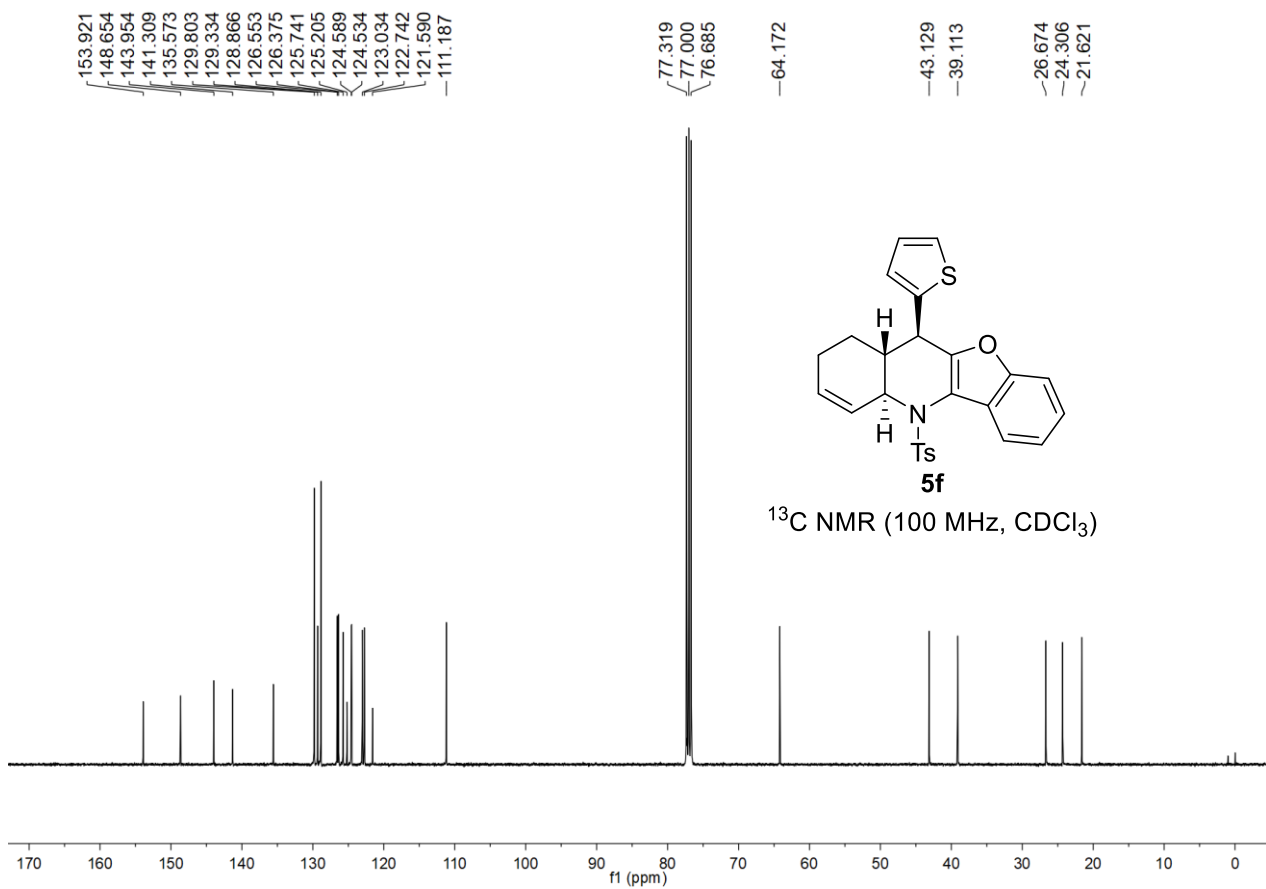



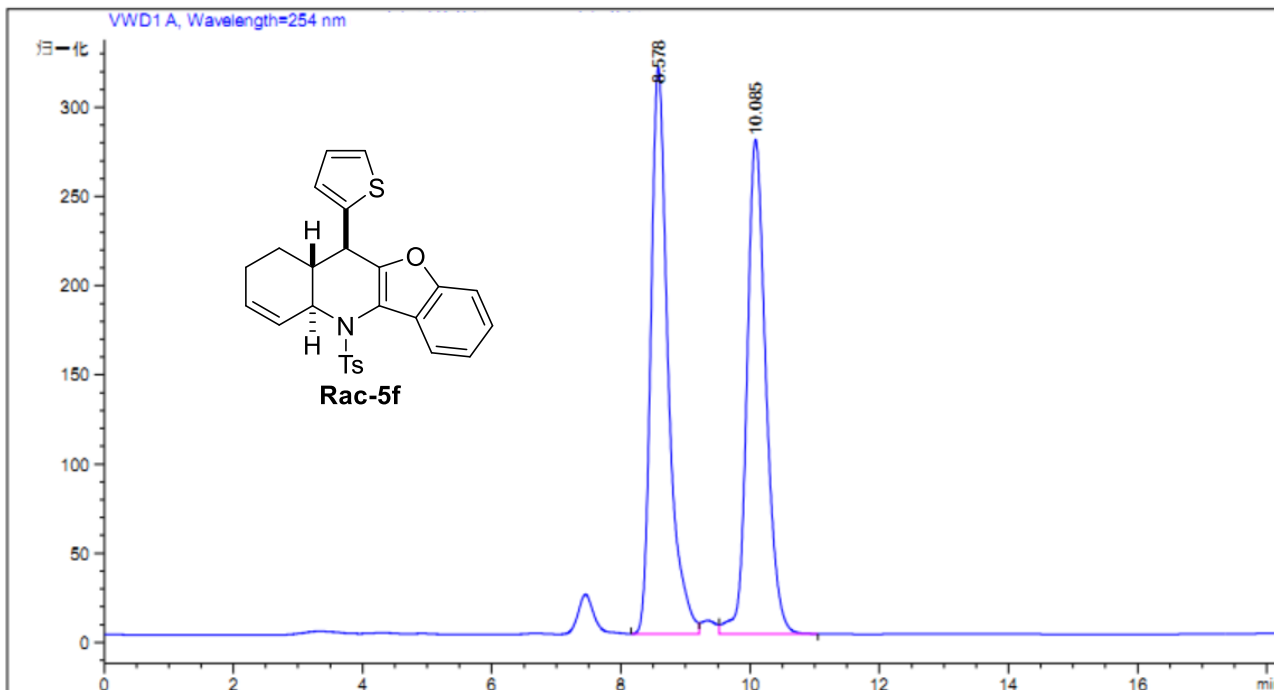

| # | [min]     | [min]  | [min]      | [mAU*s]   | [mAU]   | % |
|---|-----------|--------|------------|-----------|---------|---|
| 1 | 8.578 BV  | 0.2796 | 5904.43262 | 317.42151 | 51.1398 |   |
| 2 | 10.085 VB | 0.3103 | 5641.23438 | 277.06821 | 48.8602 |   |

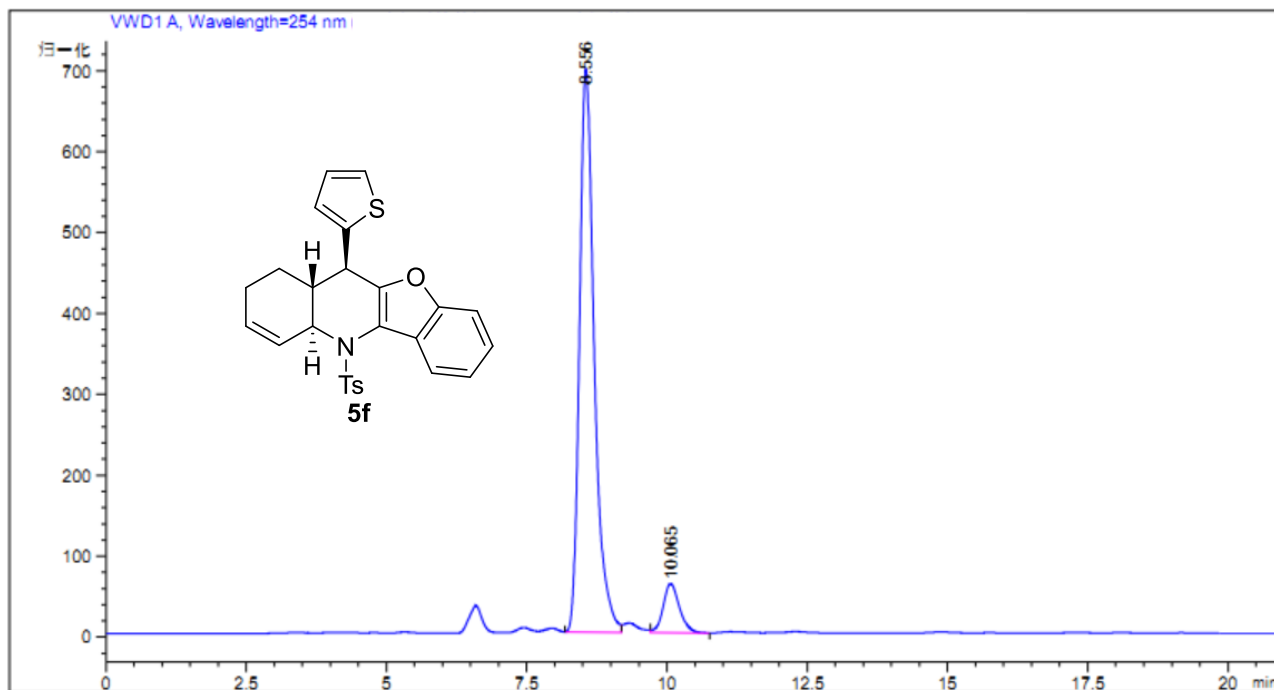

| # | [min]     | [min]  | [min]      | [mAU*s]   | [mAU]   | % |
|---|-----------|--------|------------|-----------|---------|---|
| 1 | 8.556 BV  | 0.2773 | 1.27241e4  | 696.05701 | 91.2607 |   |
| 2 | 10.065 VB | 0.3049 | 1218.48169 | 60.47950  | 8.7393  |   |

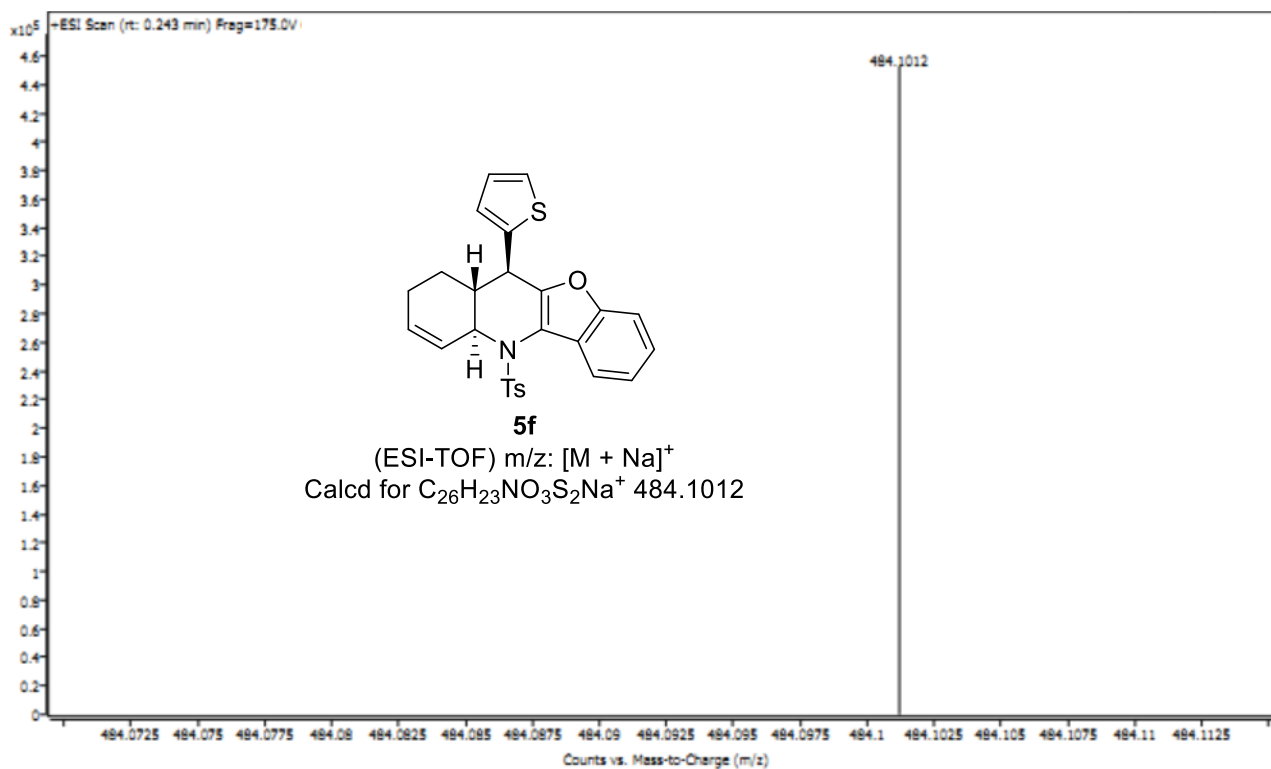

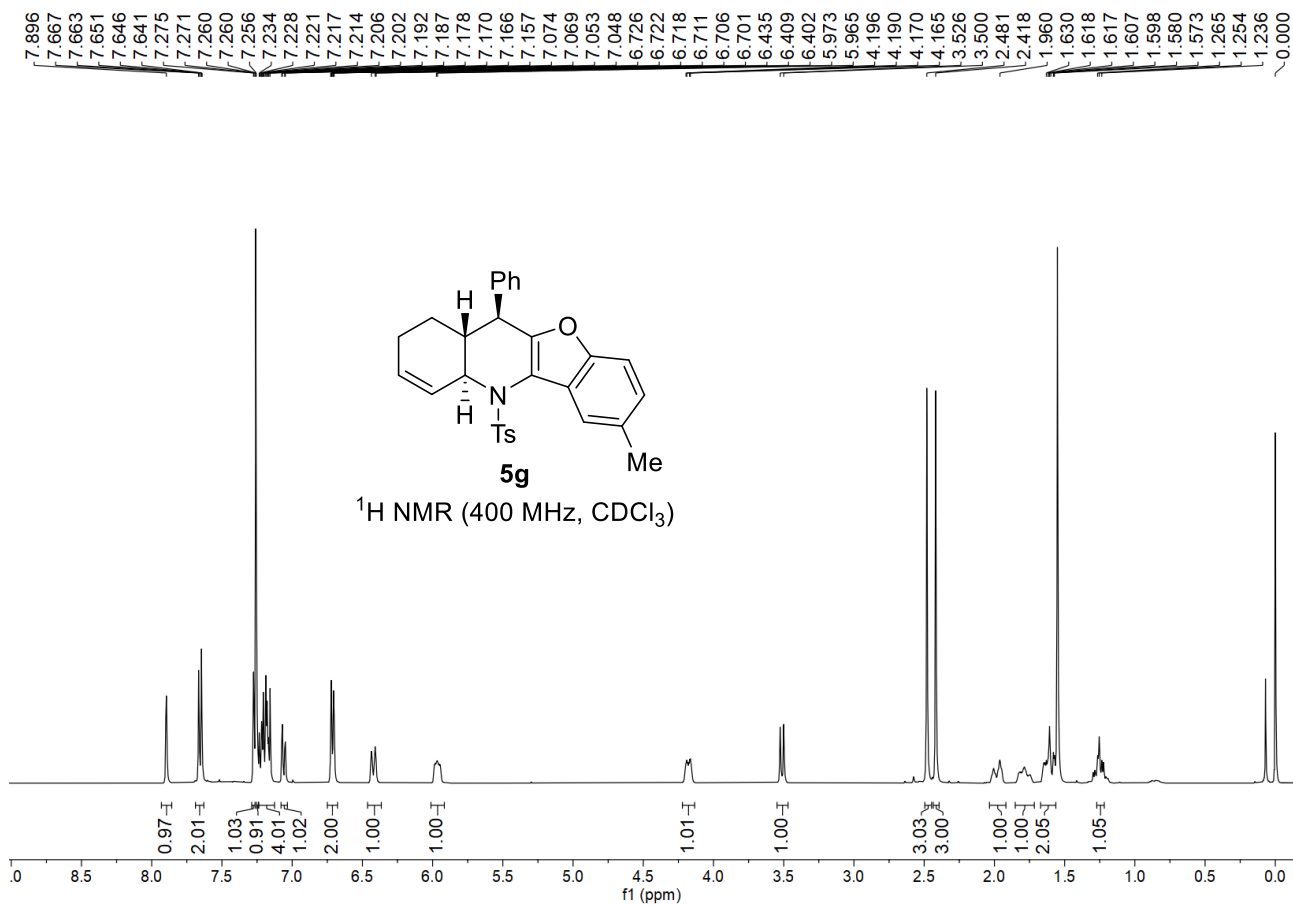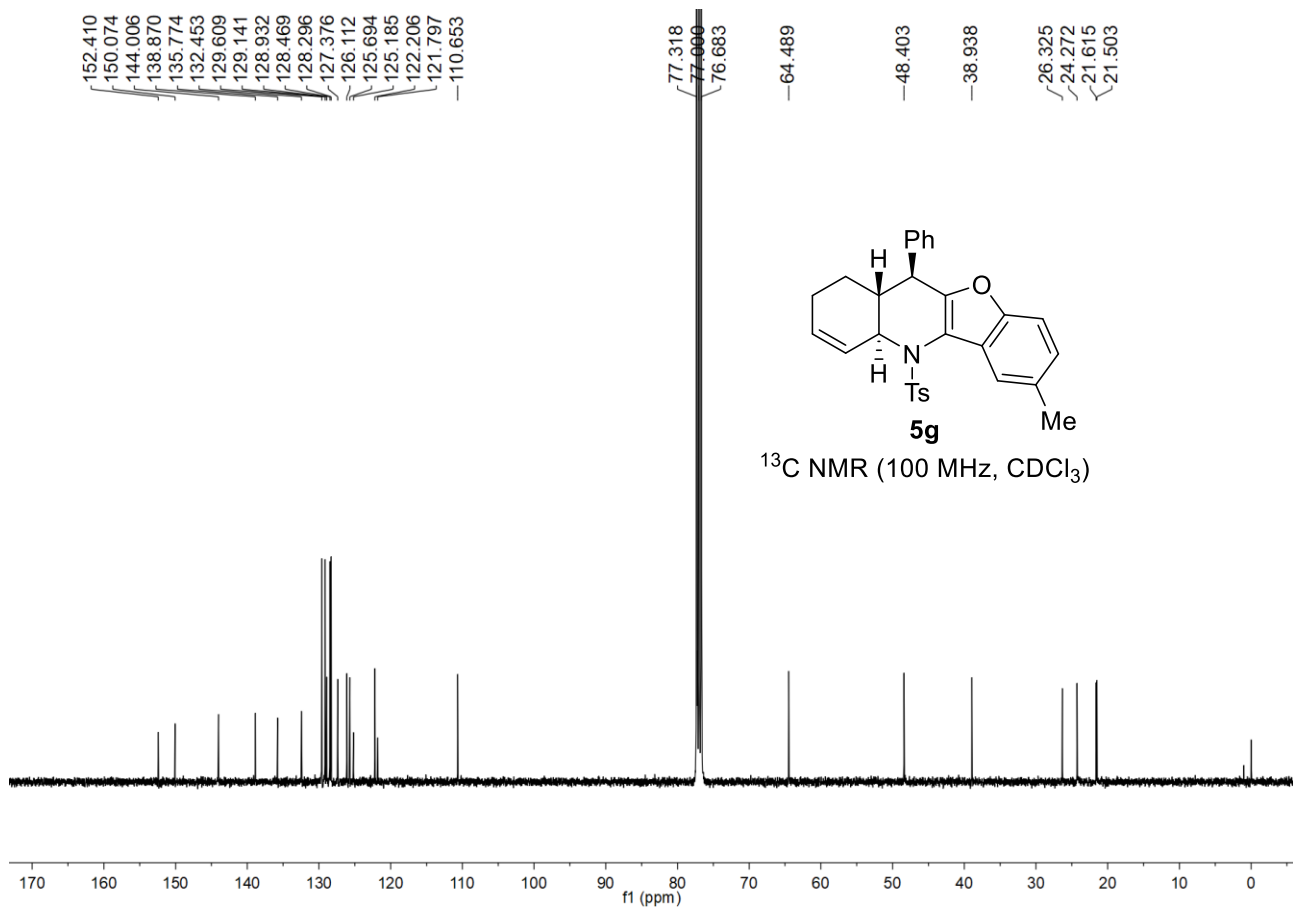

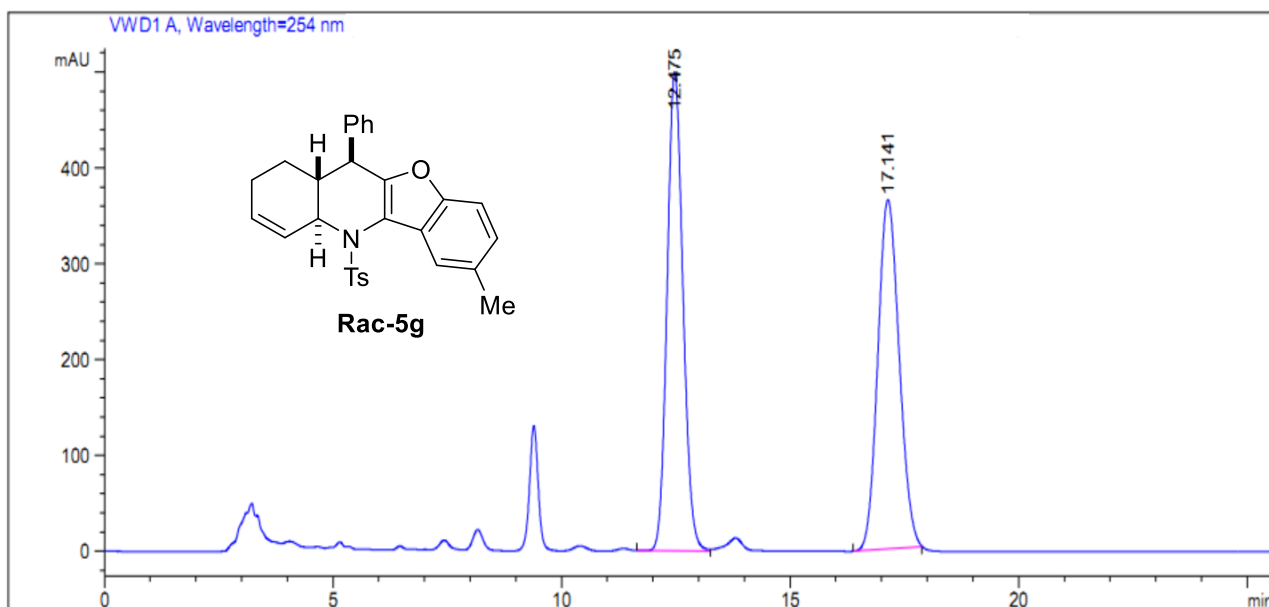

| # | [min]  | [min] | [mAU*s] | [mAU]     | %         |         |
|---|--------|-------|---------|-----------|-----------|---------|
| 1 | 12.475 | BV    | 0.3732  | 1.19901e4 | 499.58093 | 50.3257 |
| 2 | 17.141 | BBA   | 0.5070  | 1.18349e4 | 364.45029 | 49.6743 |

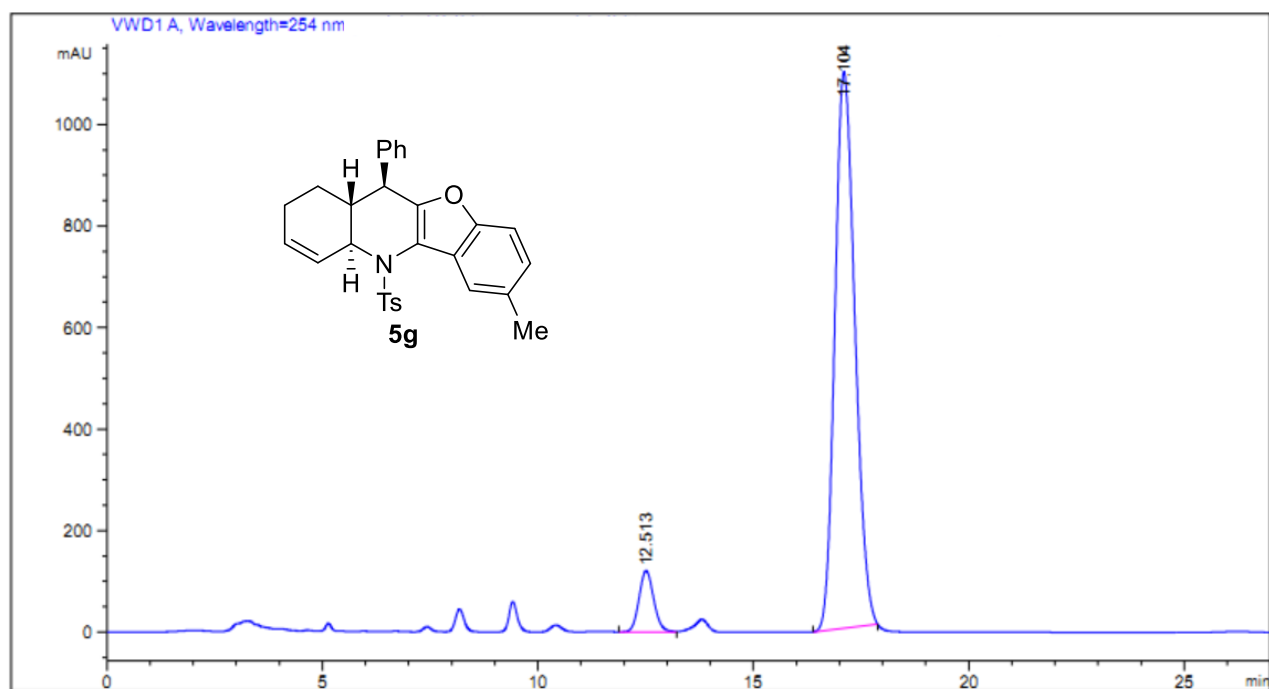

| # | [min]  | [min] | [mAU*s] | [mAU]      | %          |         |
|---|--------|-------|---------|------------|------------|---------|
| 1 | 12.513 | VV    | 0.3693  | 2898.59570 | 121.19361  | 7.5731  |
| 2 | 17.104 | BBA   | 0.5046  | 3.53765e4  | 1096.43103 | 92.4269 |

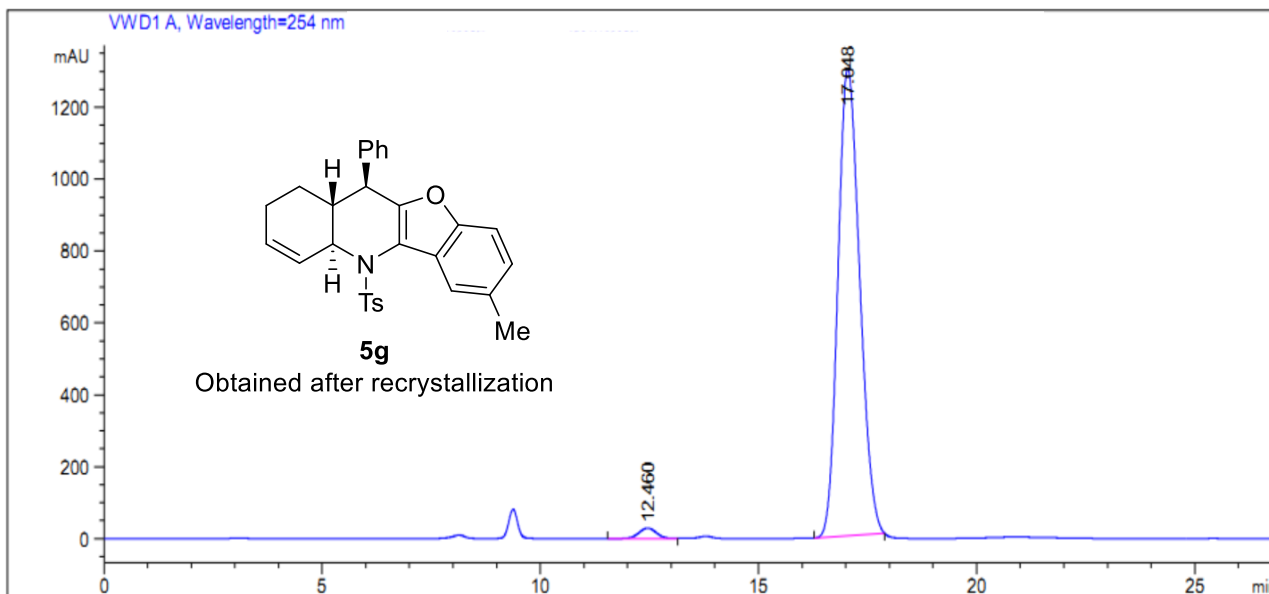

| # | [min]  |     | [min]  | [mAU*s]   | [mAU]      | %       |
|---|--------|-----|--------|-----------|------------|---------|
| 1 | 12.460 | BV  | 0.4348 | 822.14380 | 29.32762   | 1.7954  |
| 2 | 17.048 | BBA | 0.5403 | 4.49707e4 | 1300.54907 | 98.2046 |

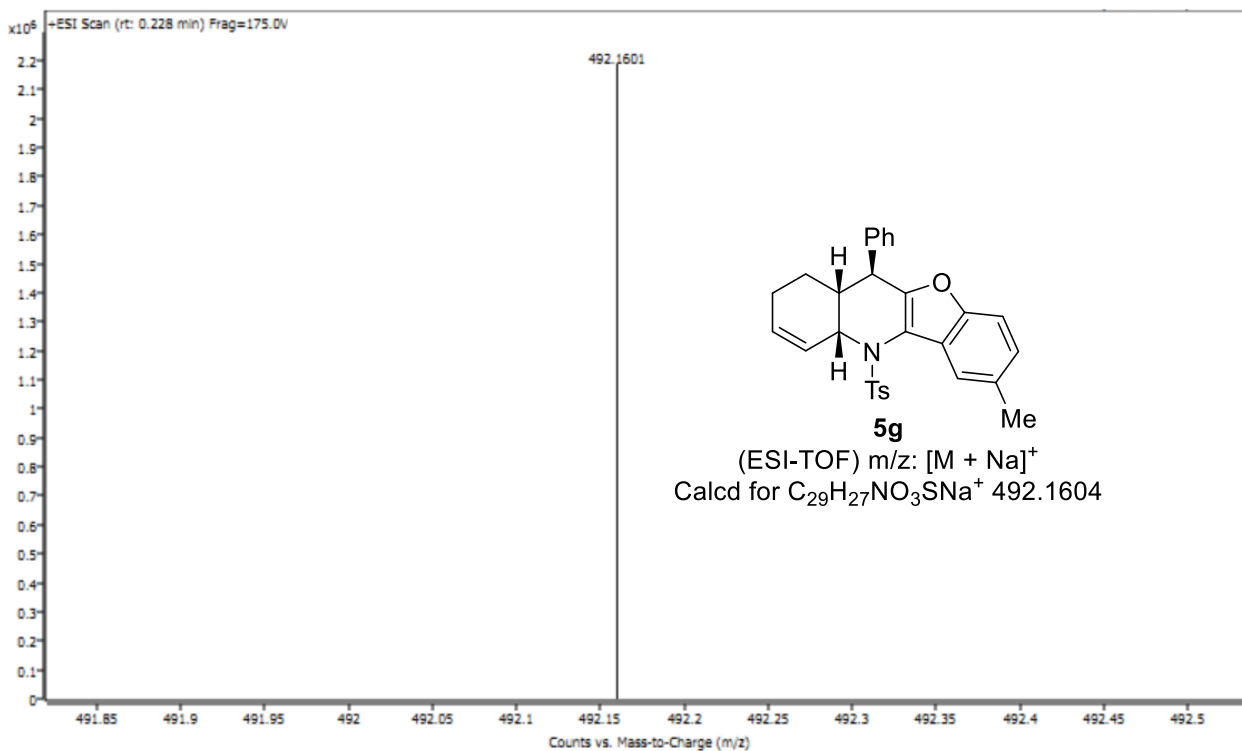

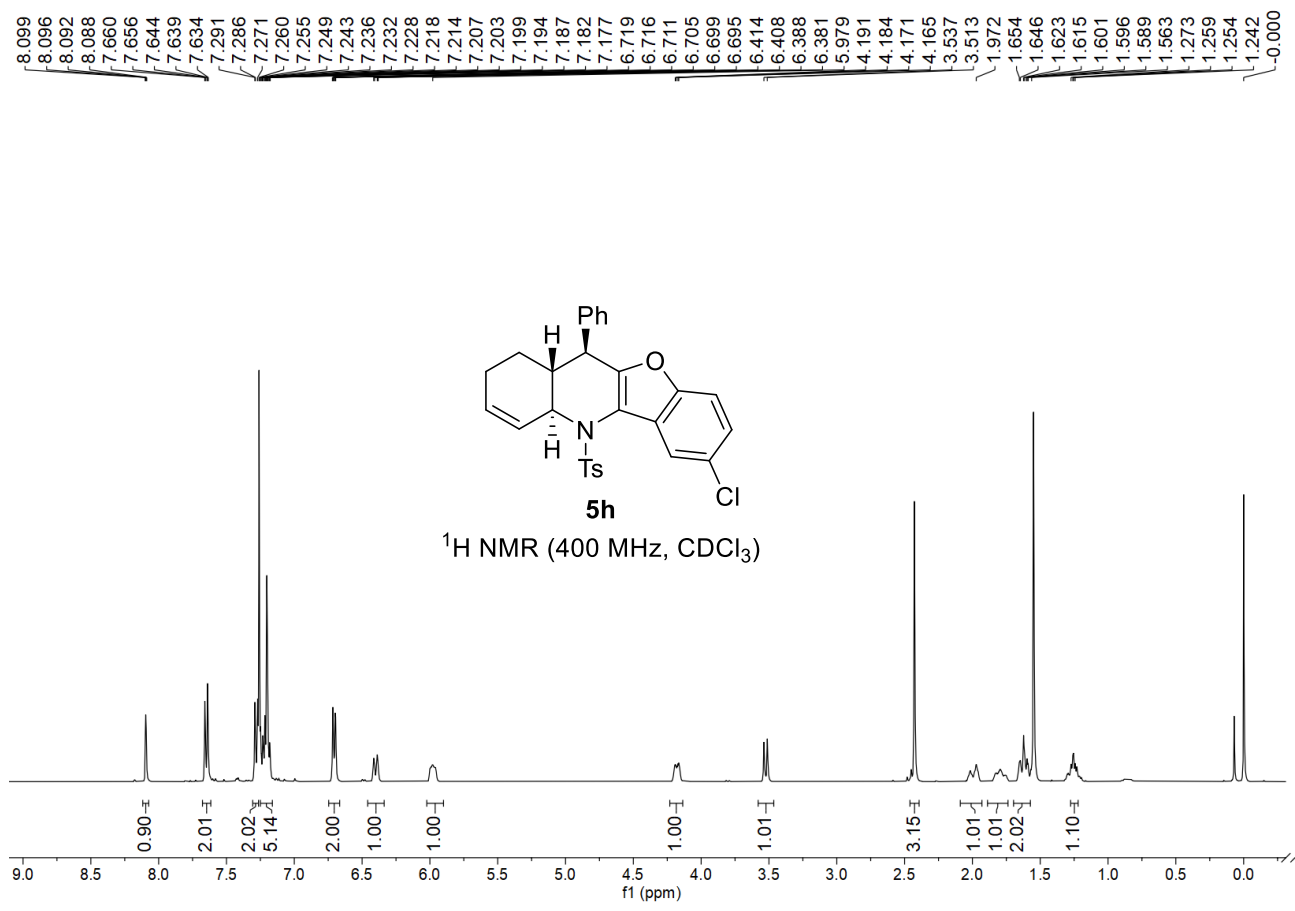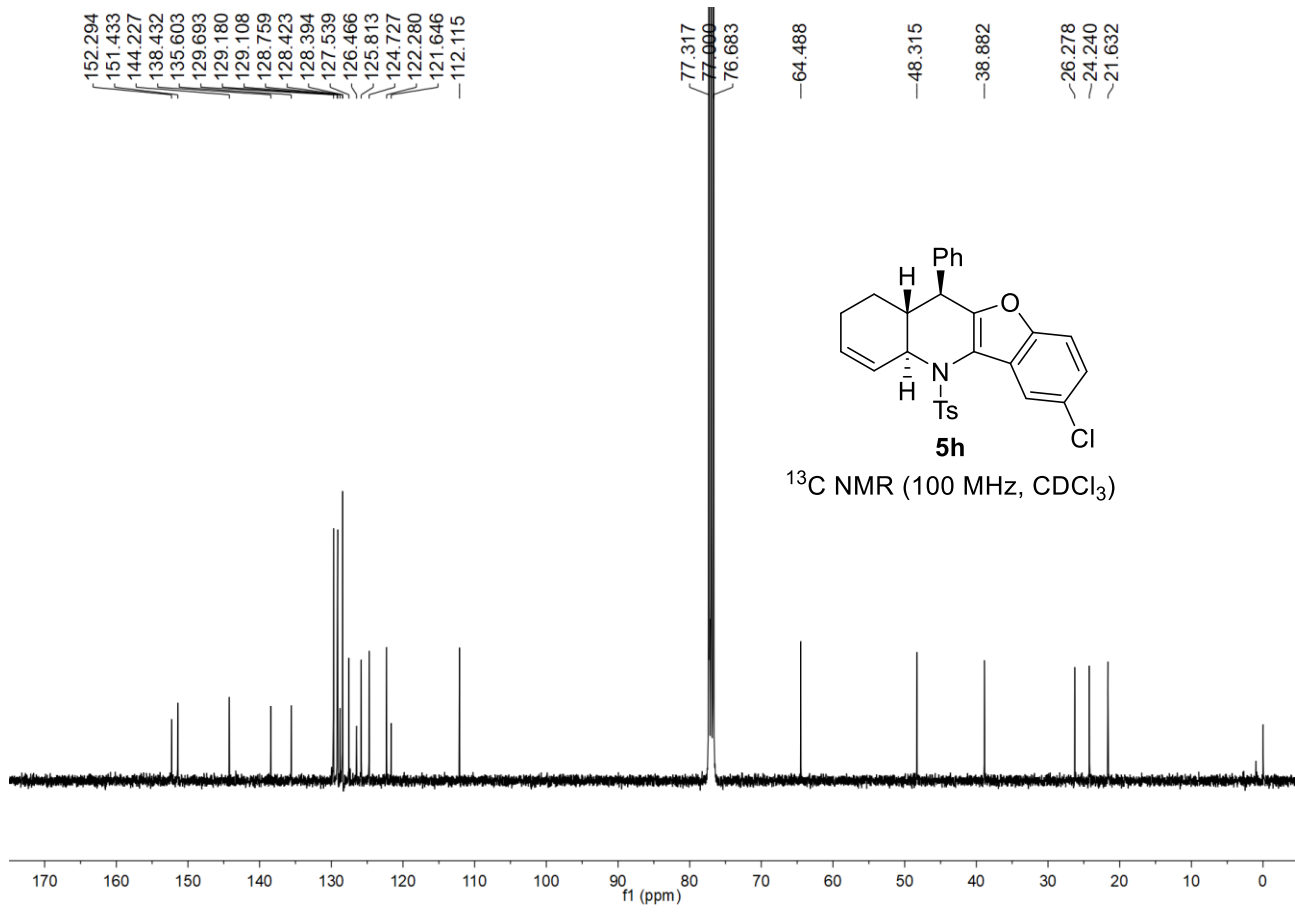

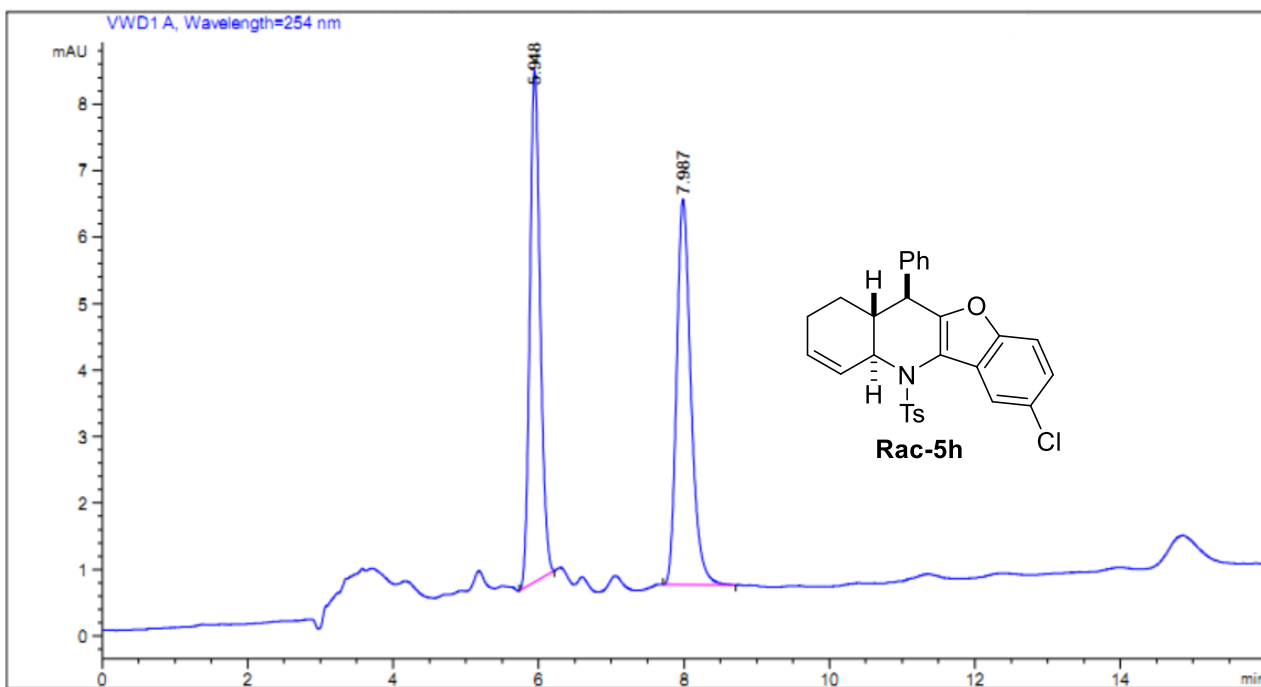

|  | 1     | 2     |    |        |        |          |          |         |         |
|--|-------|-------|----|--------|--------|----------|----------|---------|---------|
|  | 5.948 | 7.987 | BB | 0.1513 | 0.2071 | 75.88798 | 79.14803 | 7.70654 | 48.9486 |
|  |       |       |    |        |        |          |          | 5.80458 | 51.0514 |

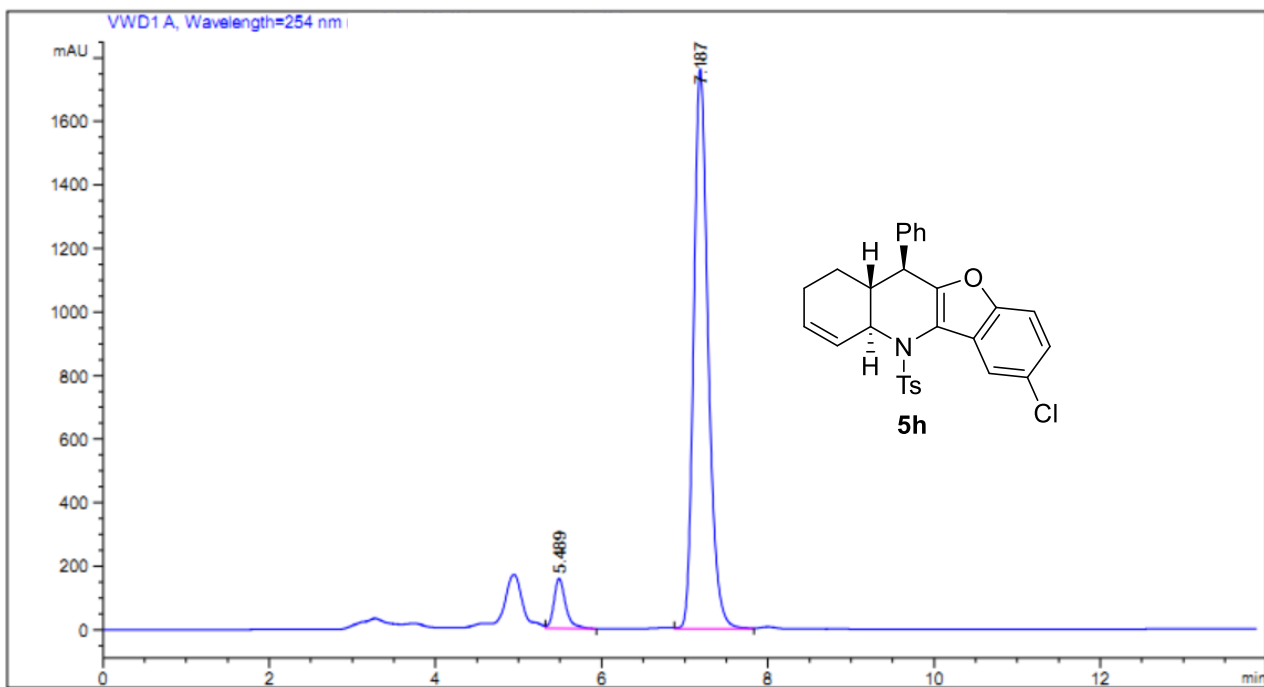

| # | [min] |    | [min]  | [mAU*s]    | [mAU]      | %       |
|---|-------|----|--------|------------|------------|---------|
| 1 | 5.489 | VB | 0.1477 | 1536.48706 | 157.01198  | 6.7351  |
| 2 | 7.187 | VV | 0.1846 | 2.12767e4  | 1761.79443 | 93.2649 |

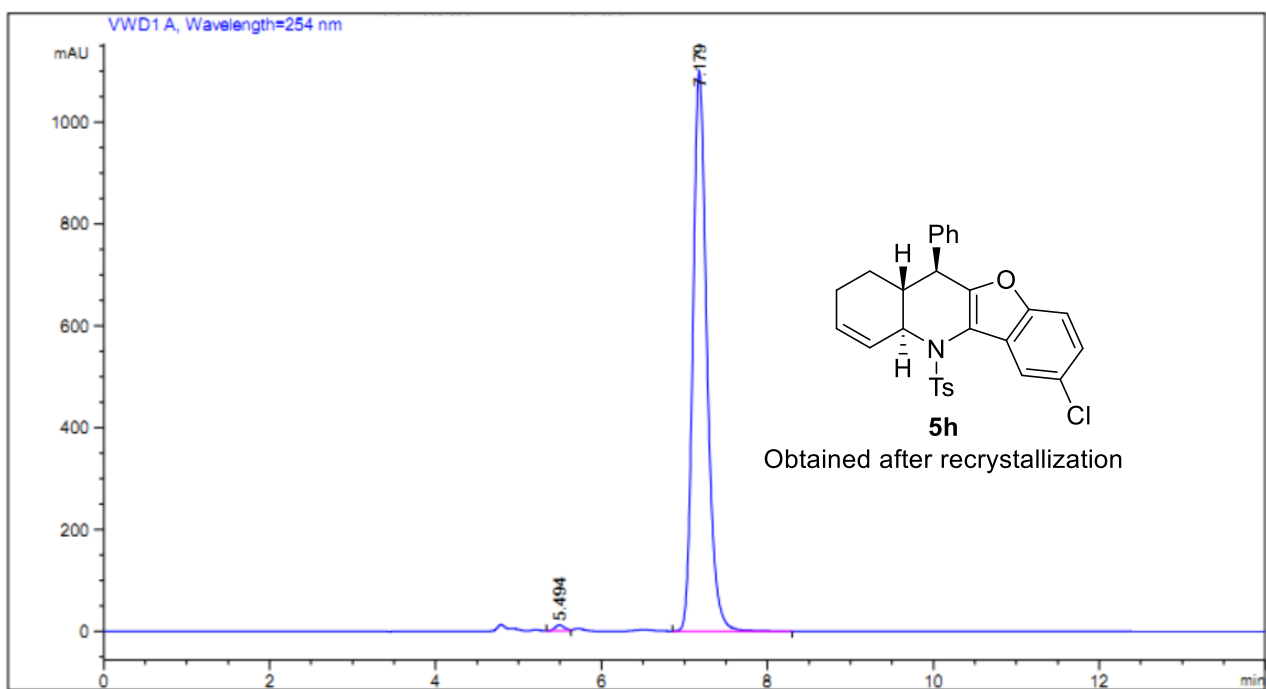

| # | [min]    | [min]  | [mAU*s]   | [mAU]      | %       |
|---|----------|--------|-----------|------------|---------|
| 1 | 5.494 BV | 0.1280 | 96.99508  | 11.61596   | 0.7467  |
| 2 | 7.179 VB | 0.1790 | 1.28932e4 | 1100.01257 | 99.2533 |

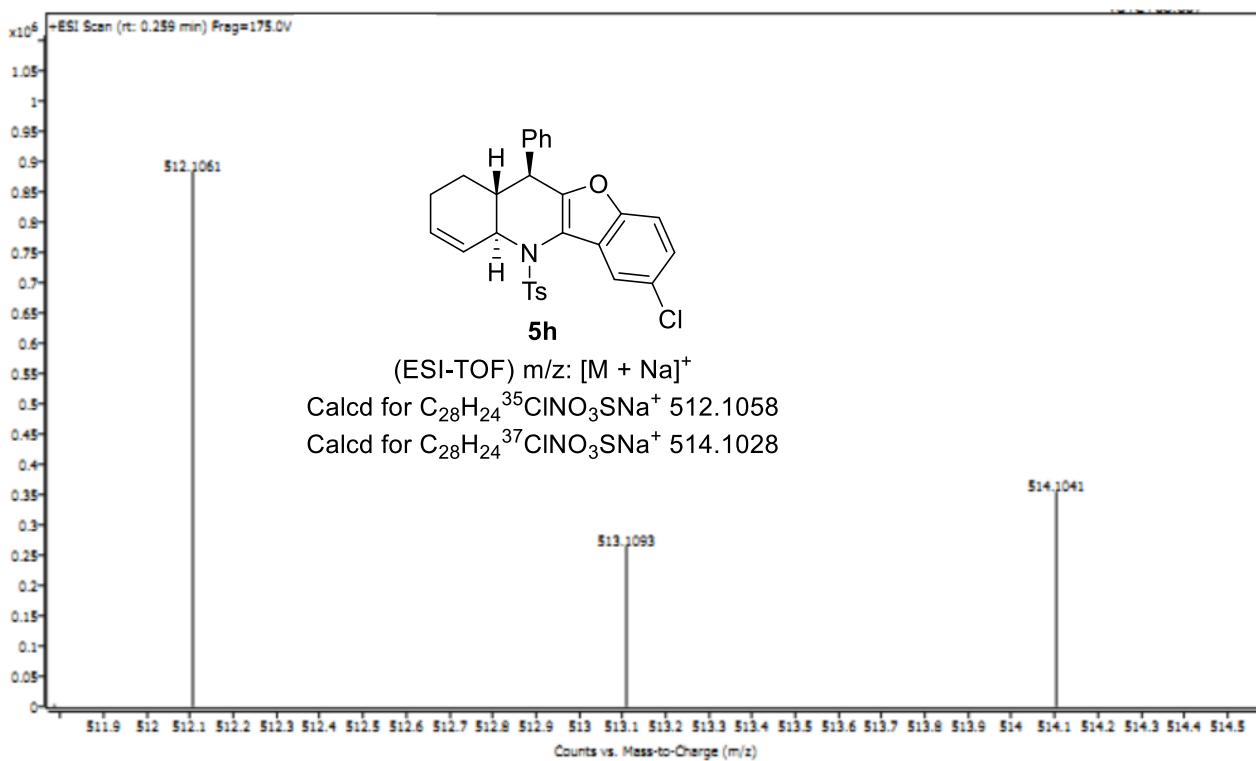



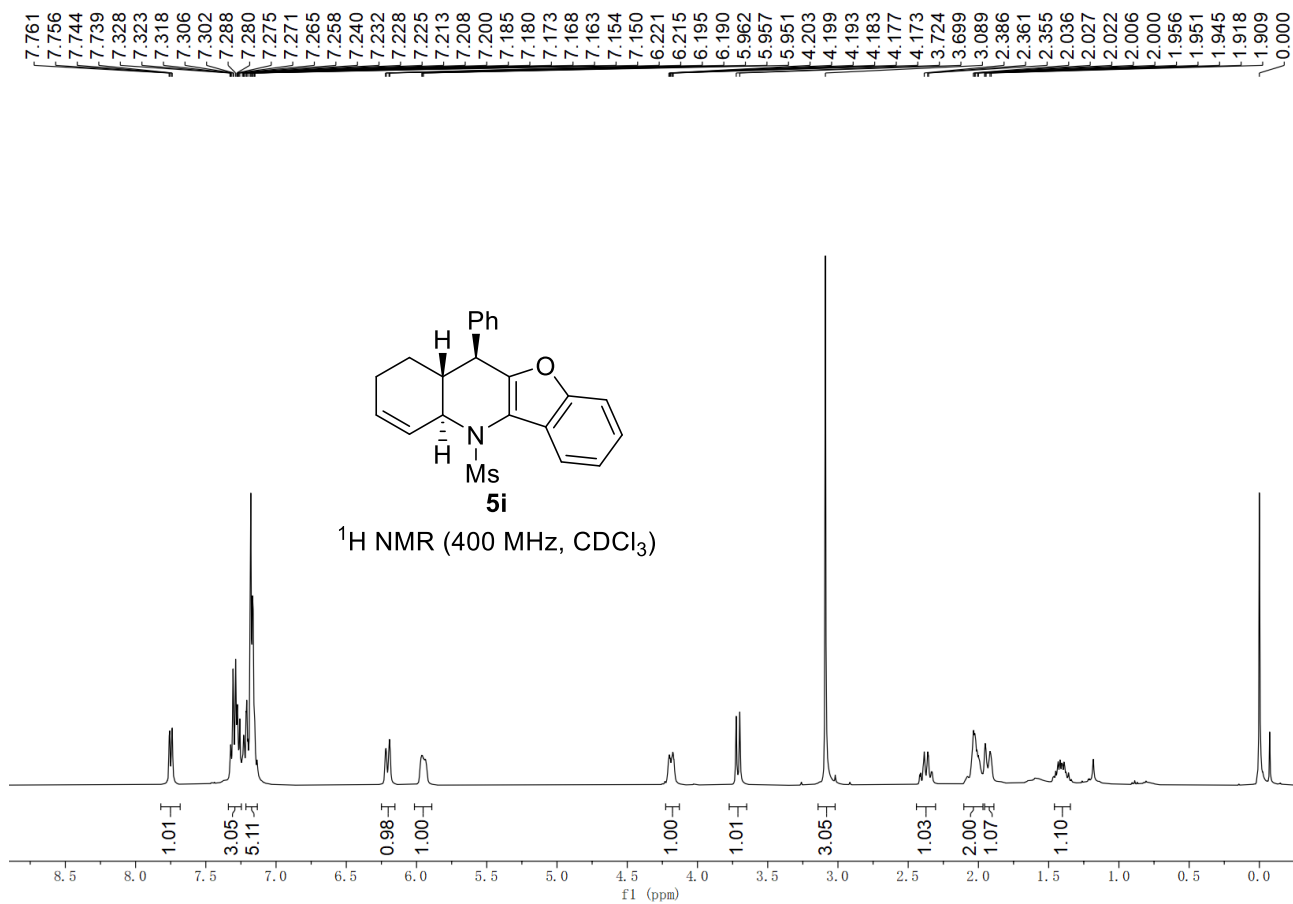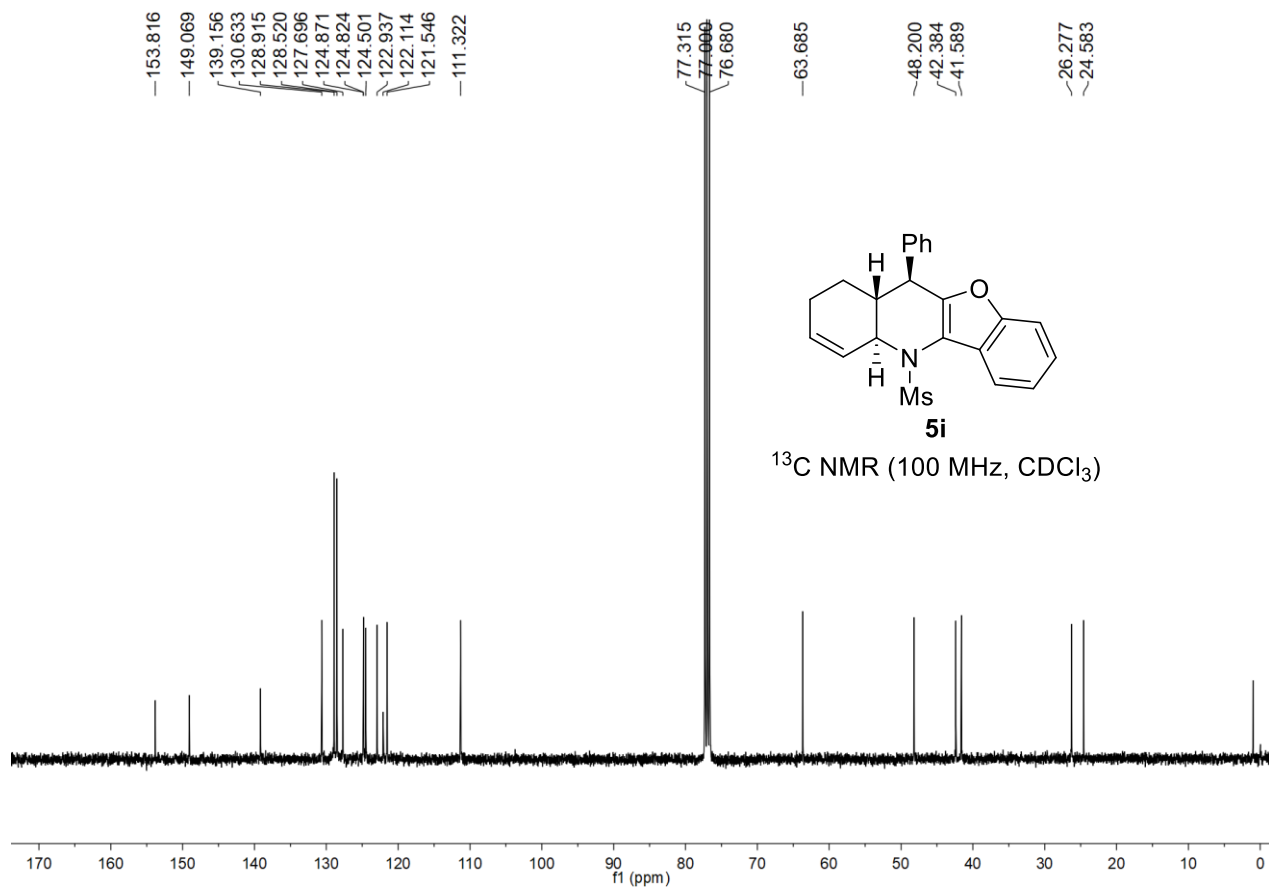

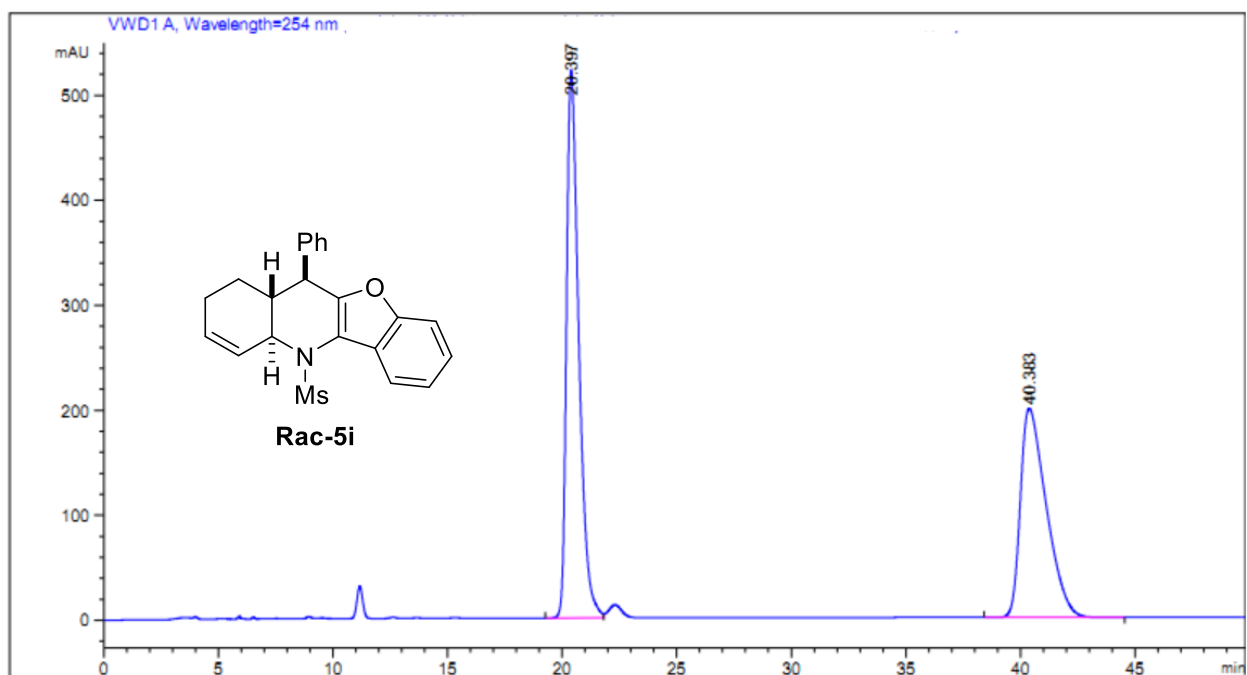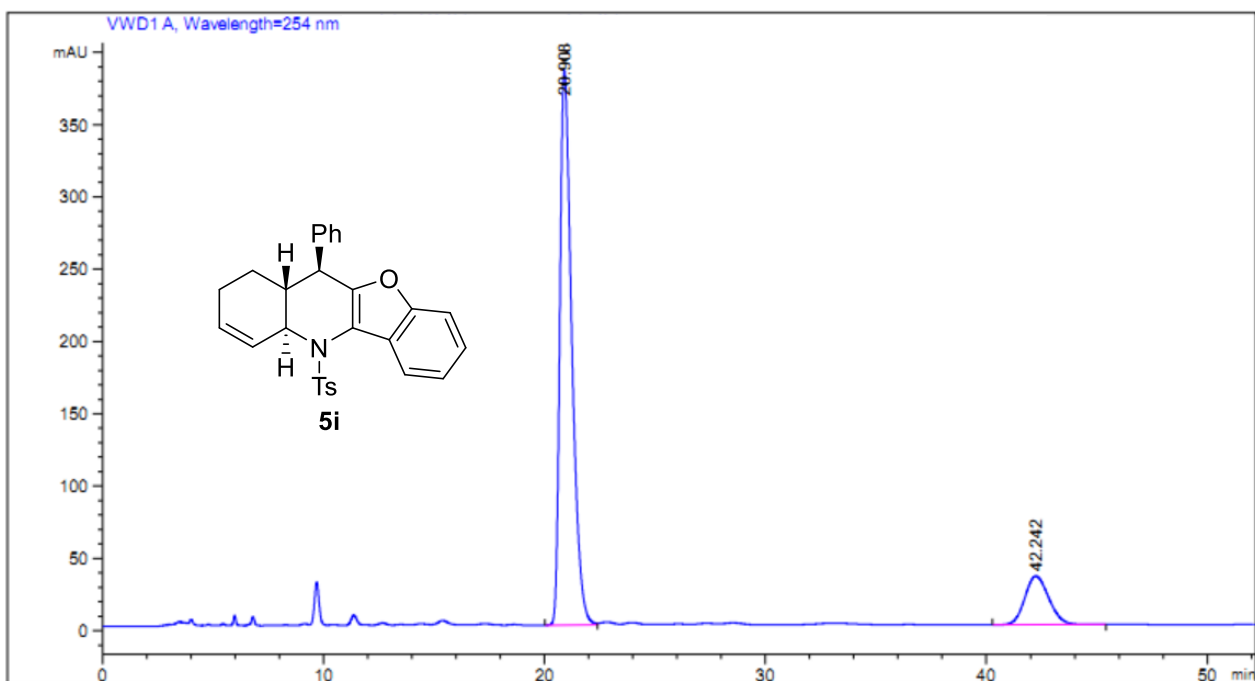

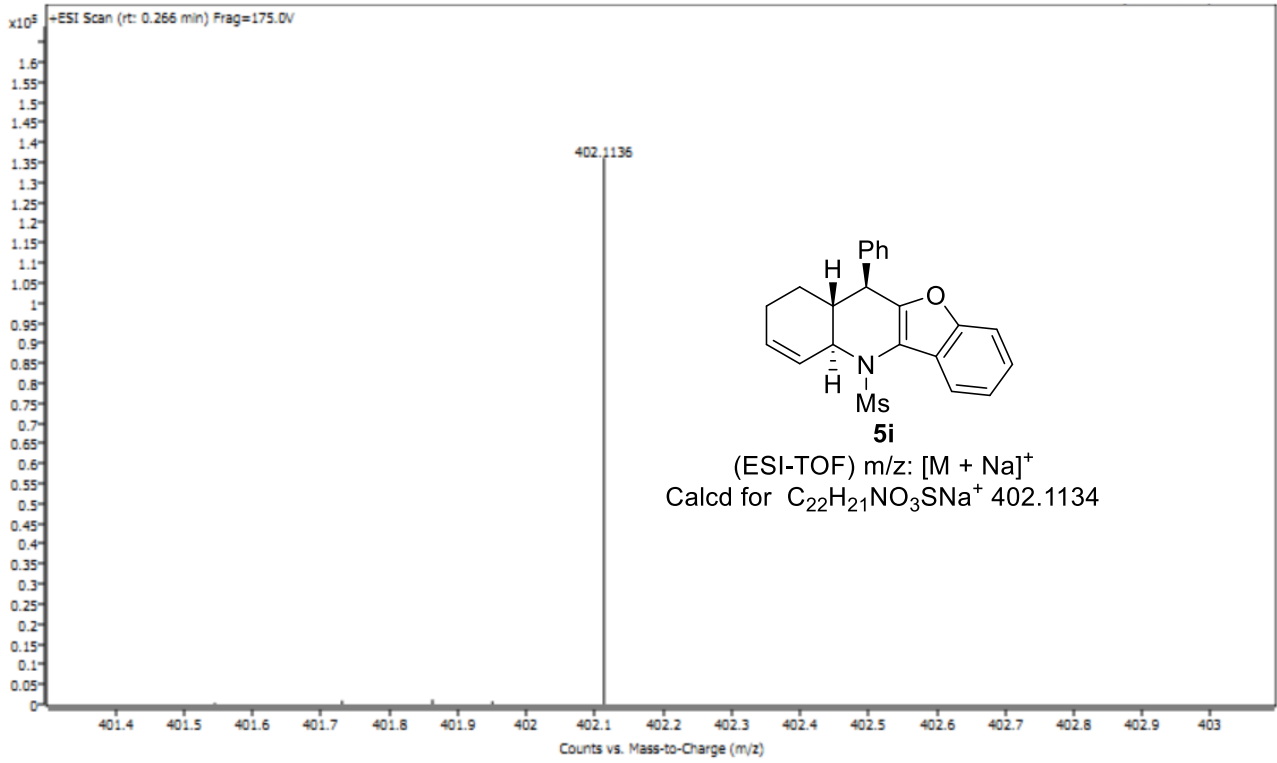

8.132  
8.113  
7.517  
7.512  
7.496  
7.326  
7.321  
7.313  
7.308  
7.303  
7.298  
7.290  
7.286  
7.274  
7.269  
7.257  
7.231  
7.210  
7.202  
7.196  
7.187  
7.183  
7.180  
7.132  
7.128  
7.113  
7.095  
6.433  
6.429  
6.415  
6.411  
6.411  
5.830  
5.818  
5.814  
4.145  
4.126  
4.120  
3.613  
3.587  
2.454  
2.437  
2.417  
2.042  
1.982  
1.568  
1.559  
1.546  
1.415  
1.404  
1.393  
1.374  
1.369  
1.358  
0.941  
0.924  
0.905  
0.000

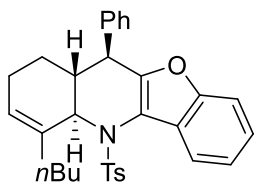

**5j**

$^1\text{H NMR}$ (400 MHz,  $\text{CDCl}_3$ )

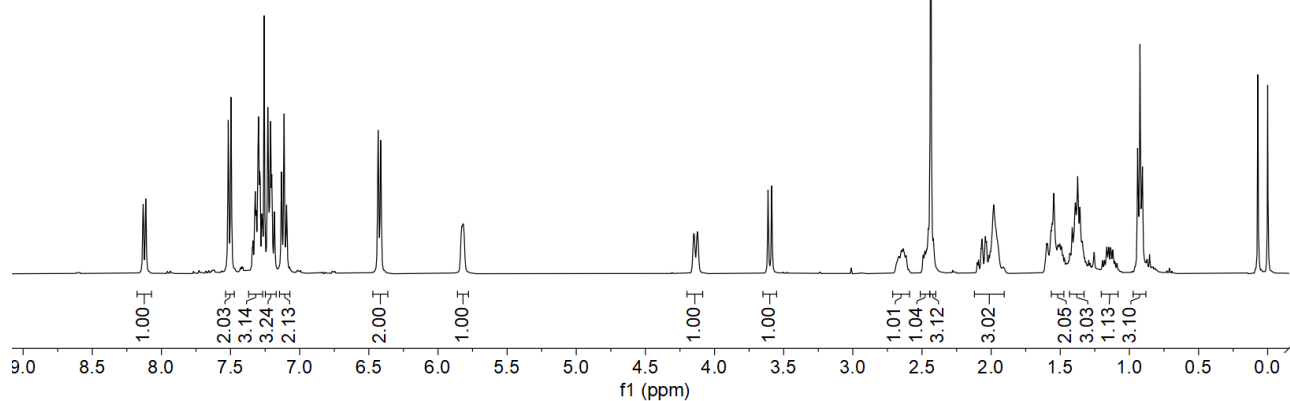

153.884  
150.803  
143.880  
138.988  
137.679  
136.151  
129.640  
129.279  
128.299  
128.229  
127.292  
125.583  
124.802  
124.438  
123.107  
123.012  
122.094  
111.284  
77.318  
77.004  
76.683  
68.842  
49.571  
39.844  
34.121  
31.281  
26.910  
24.715  
22.622  
21.576  
14.099

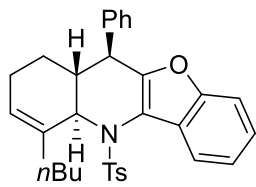

**5j**

$^{13}\text{C NMR}$ (100 MHz,  $\text{CDCl}_3$ )

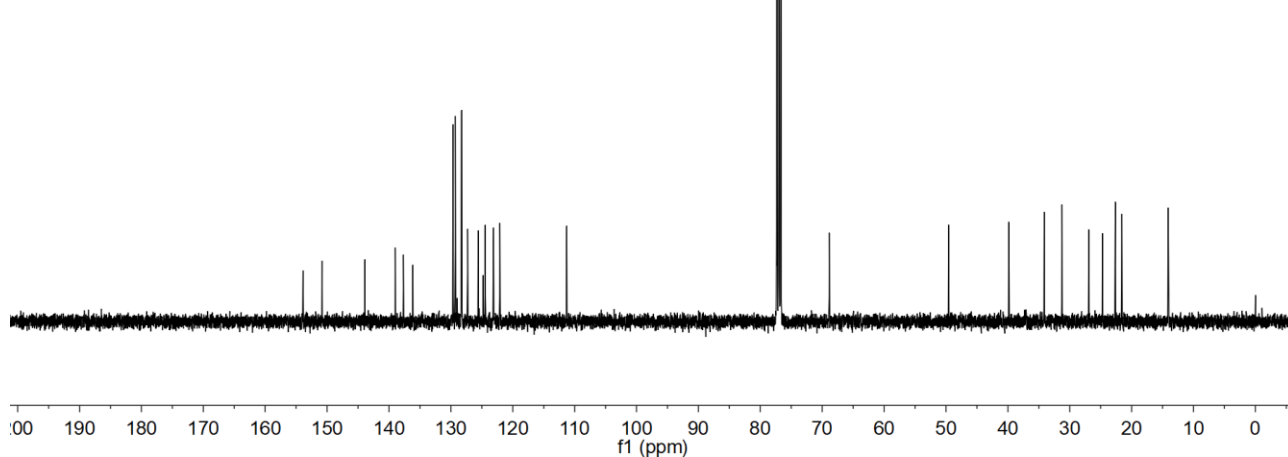

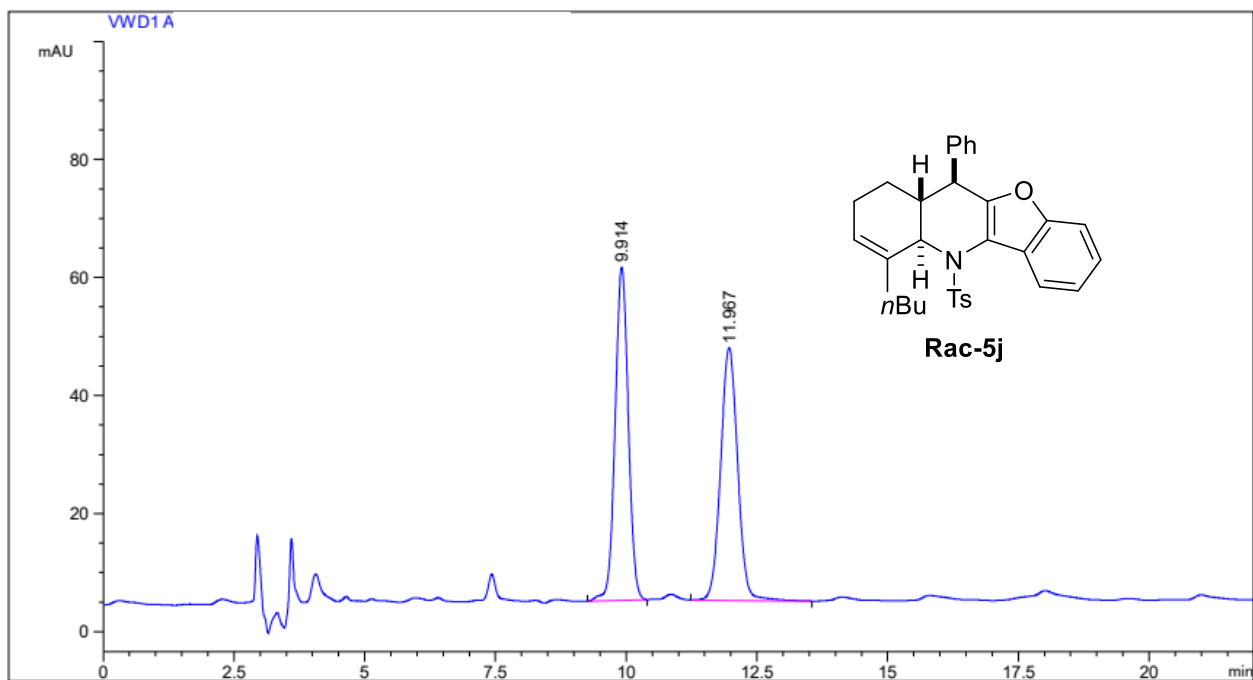

| # | [min]  | [min] | mAU    | *s        | [mAU]    | %       |
|---|--------|-------|--------|-----------|----------|---------|
| 1 | 9.914  | BB    | 0.2718 | 991.04480 | 56.45636 | 50.5513 |
| 2 | 11.967 | BB    | 0.3516 | 969.42804 | 42.80004 | 49.4487 |

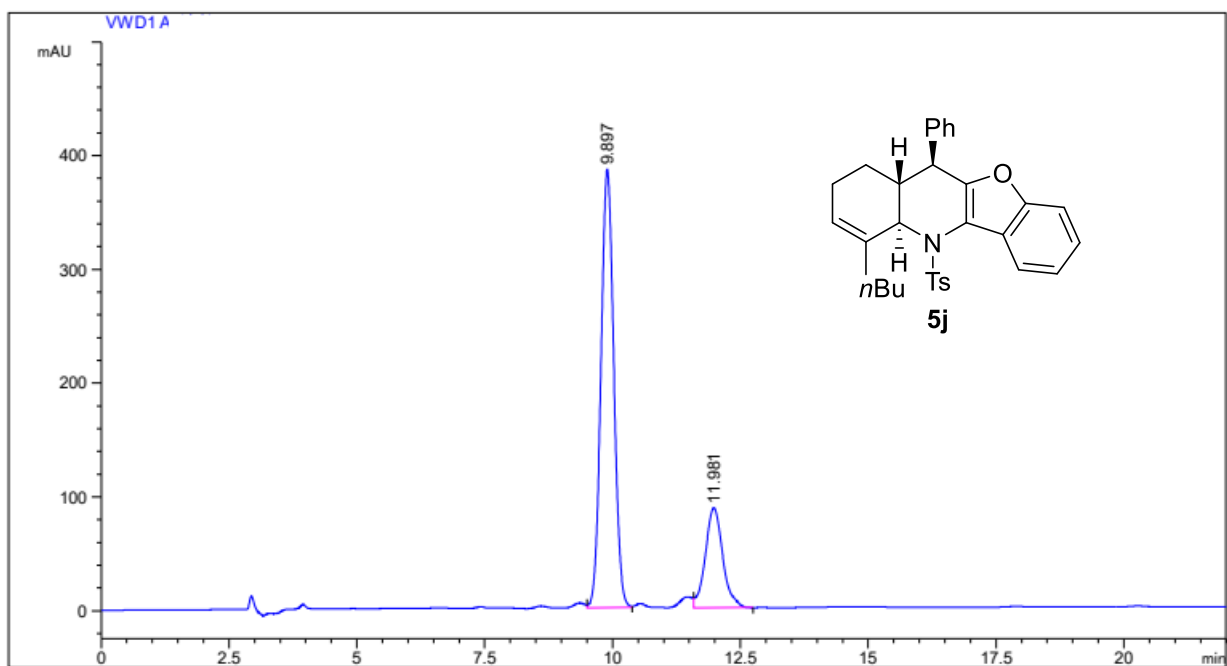

| # | [min]  | [min] | mAU    | *s         | [mAU]     | %       |
|---|--------|-------|--------|------------|-----------|---------|
| 1 | 9.897  | VV    | 0.2713 | 6697.98730 | 385.17892 | 76.3581 |
| 2 | 11.981 | VB    | 0.3631 | 2073.82251 | 87.74405  | 23.6419 |

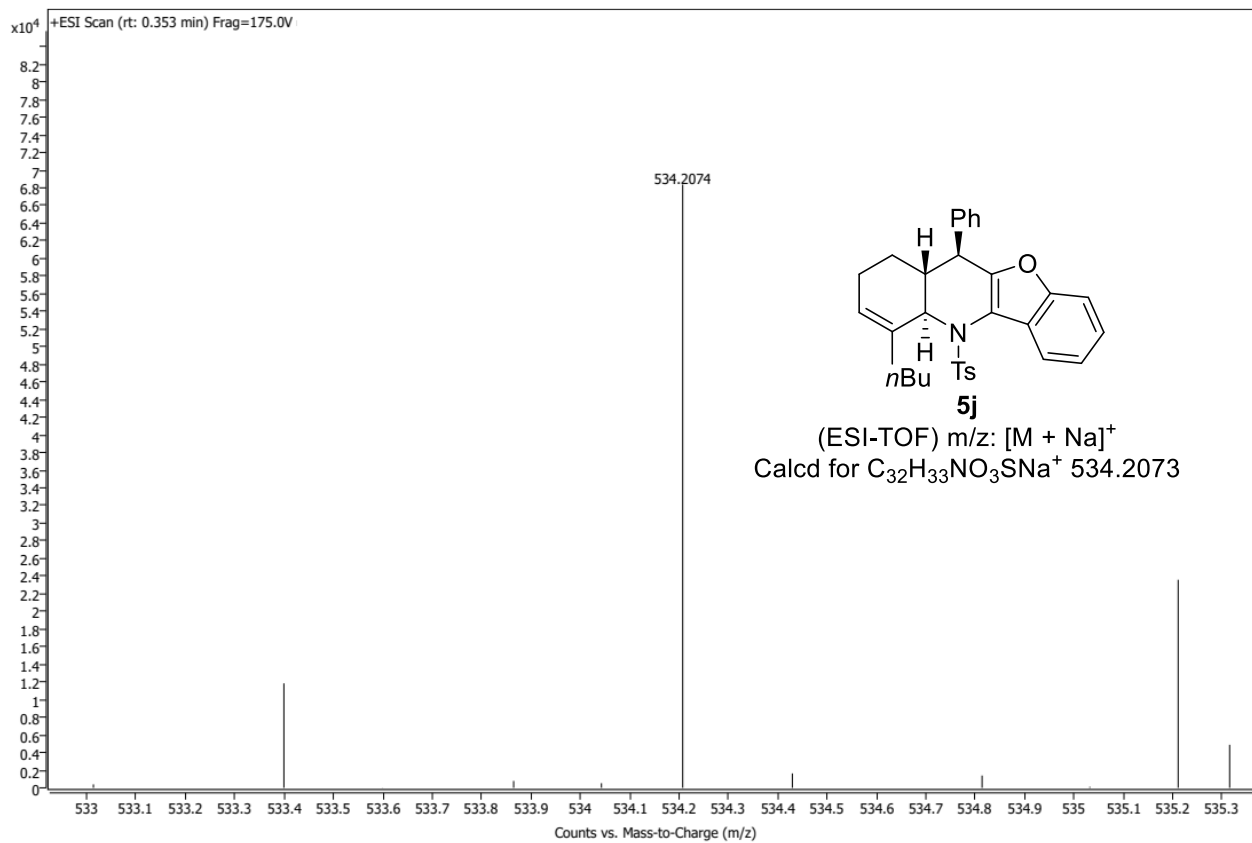

8.228  
8.225  
8.213  
8.209  
7.618  
7.597  
7.301  
7.298  
7.292  
7.283  
7.279  
7.267  
7.262  
7.190  
7.184  
7.176  
7.172  
7.169  
7.147  
7.132  
7.128  
7.115  
7.111  
7.107  
6.544  
6.542  
6.538  
6.535  
6.521  
6.521  
5.834  
5.827  
5.822  
5.421  
5.413  
5.409  
5.385  
5.380  
5.170  
5.162  
5.157  
3.964  
3.935  
2.425  
1.705  
1.697  
1.679  
1.676  
1.671  
1.668  
1.540  
1.529  
1.515  
1.502  
1.492  
1.481  
1.474  
1.465  
1.444  
0.000

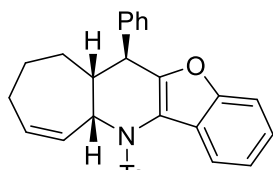

7

$^1\text{H NMR}$  (400 MHz,  $\text{CDCl}_3$ )

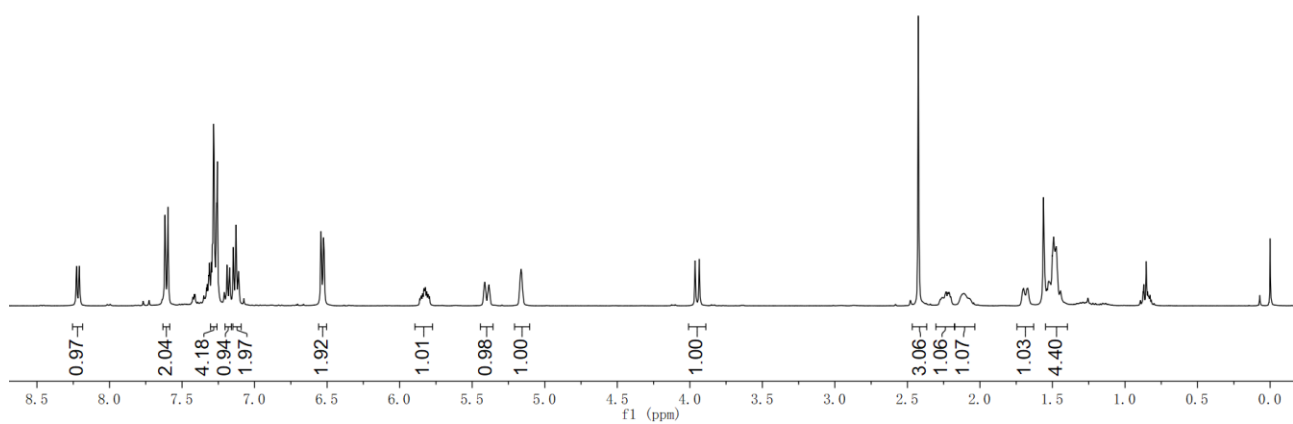

154.331  
150.000  
144.061  
138.910  
135.097  
132.607  
132.304  
129.803  
128.370  
128.327  
128.177  
127.907  
127.208  
124.499  
123.022  
122.395  
117.875  
111.218  
77.317  
77.000  
76.679  
62.716  
40.558  
39.701  
29.399  
28.804  
21.539  
21.032

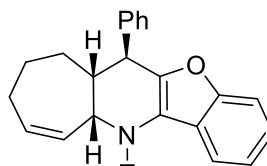

7

$^{13}\text{C NMR}$  (100 MHz,  $\text{CDCl}_3$ )

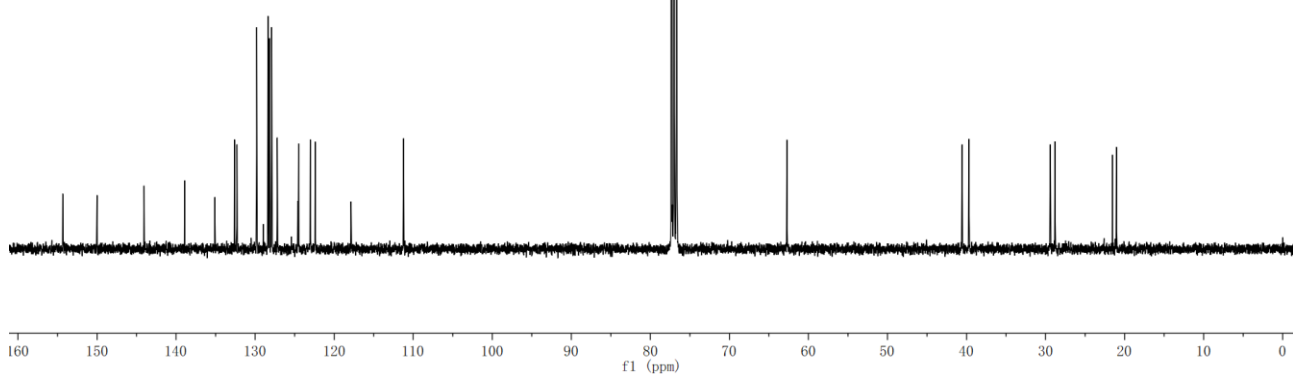

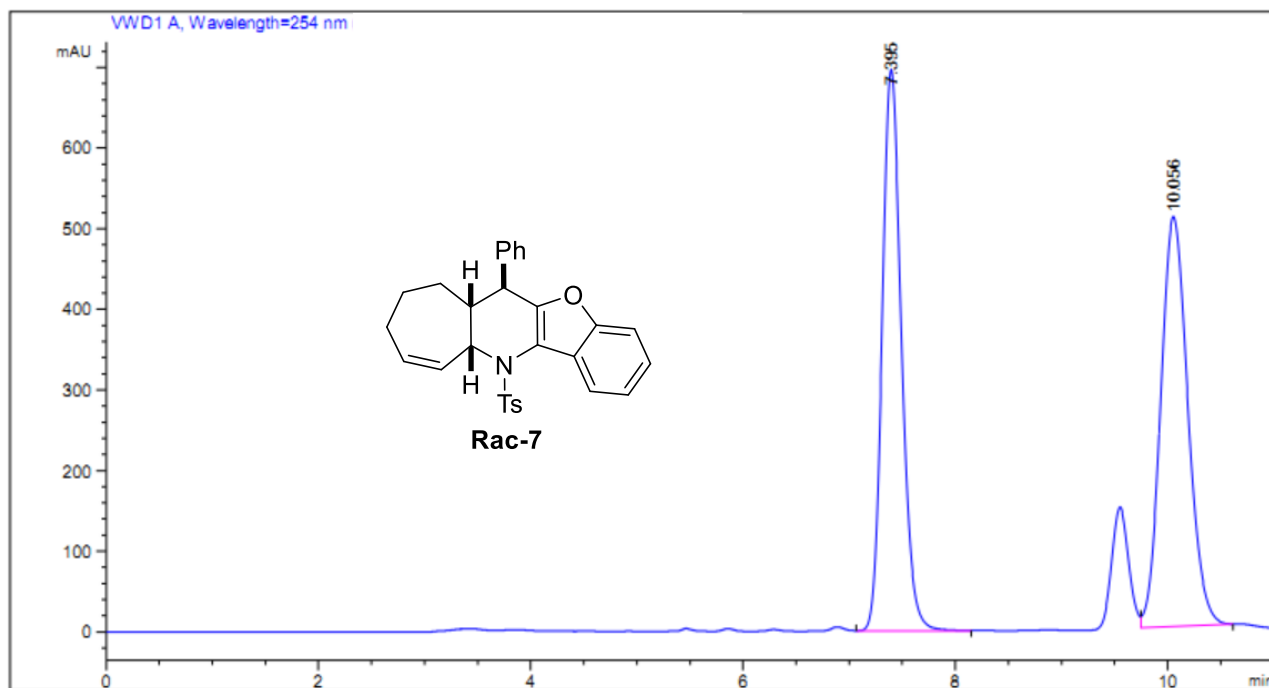

| # | [min]  | [min] | [mAU*s] | [mAU]      | %         |         |
|---|--------|-------|---------|------------|-----------|---------|
| 1 | 7.395  | BBA   | 0.1926  | 8705.24414 | 695.48901 | 50.1577 |
| 2 | 10.056 | BB    | 0.2706  | 8650.50391 | 499.21210 | 49.8423 |

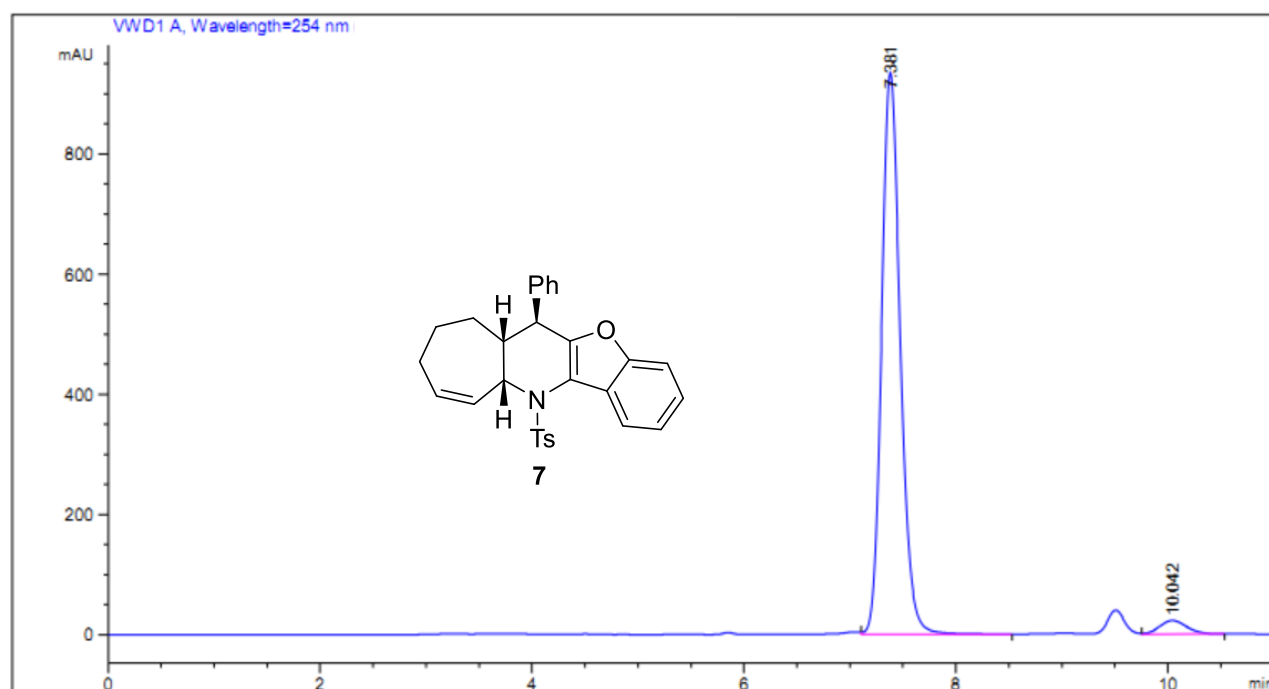

| # | [min]  | [min] | [mAU*s] | [mAU]     | %         |         |
|---|--------|-------|---------|-----------|-----------|---------|
| 1 | 7.381  | BBA   | 0.1884  | 1.13252e4 | 931.93732 | 96.7588 |
| 2 | 10.042 | BB    | 0.2685  | 379.36380 | 22.12307  | 3.2412  |



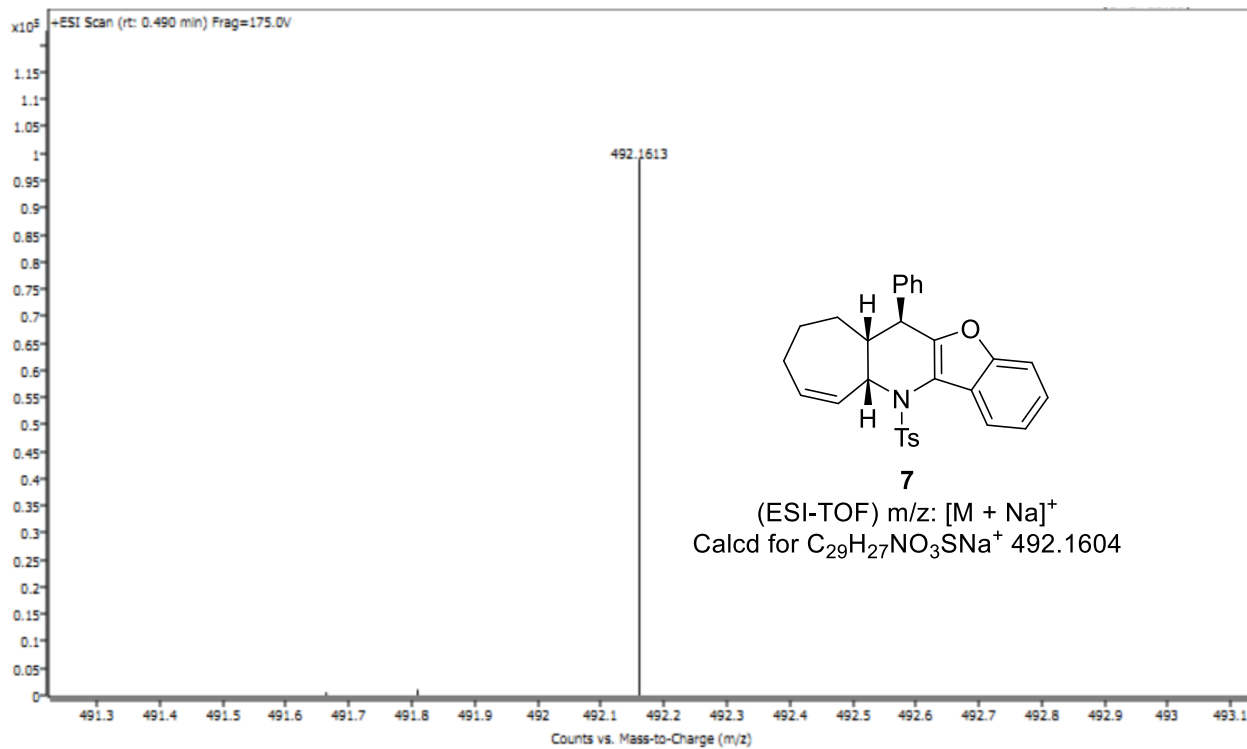

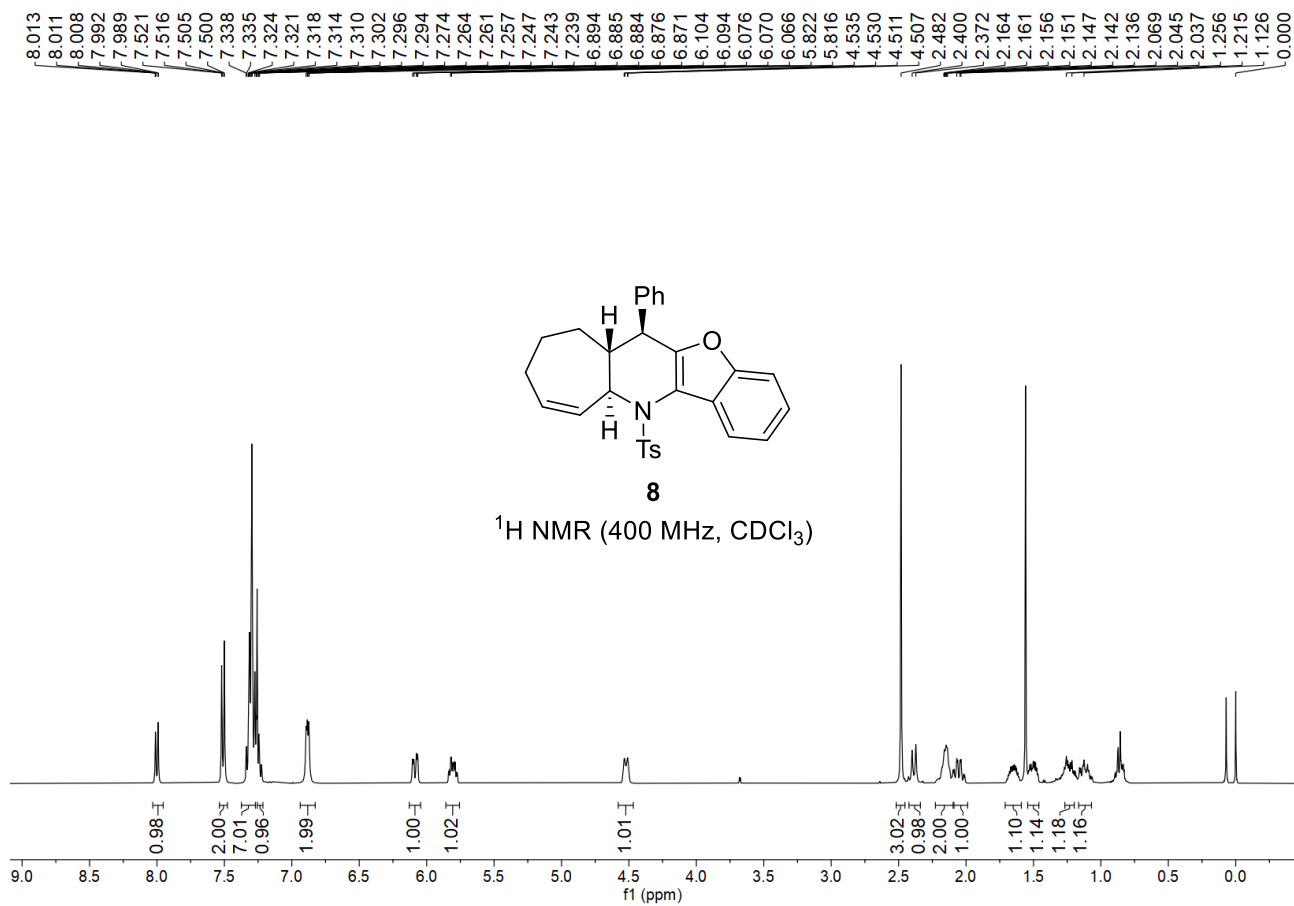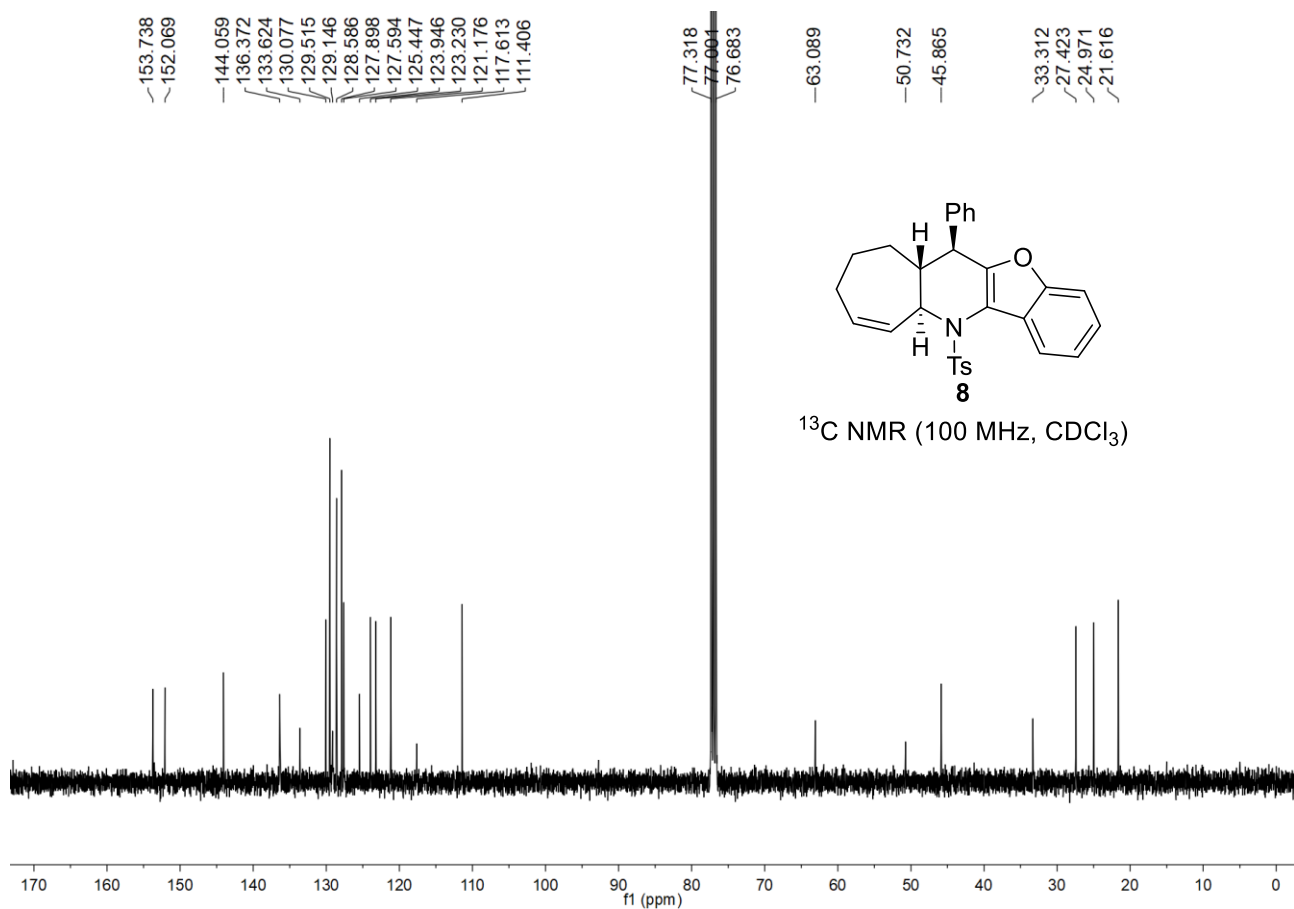

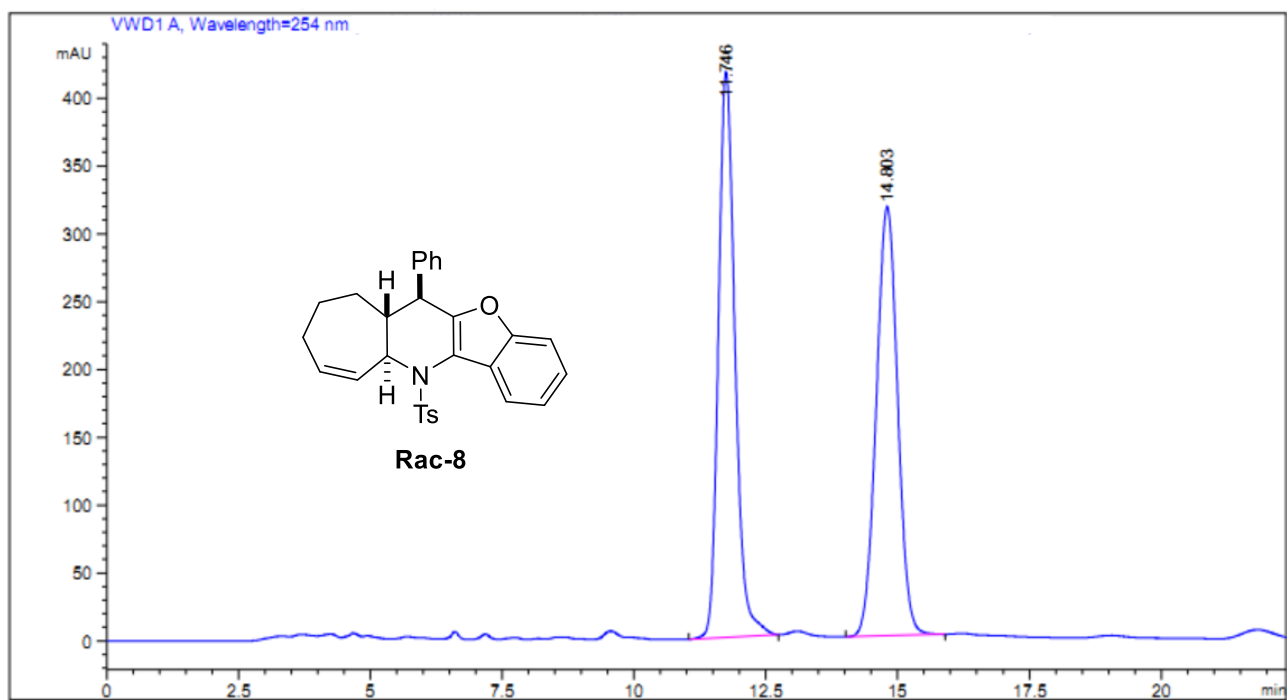

| # | [min]  | [min] | [min]  | [mAU*s]    | [mAU]     | %       |
|---|--------|-------|--------|------------|-----------|---------|
| 1 | 11.746 | BBA   | 0.3386 | 9129.81934 | 416.64188 | 50.6234 |
| 2 | 14.803 | BB    | 0.4393 | 8904.95898 | 316.14224 | 49.3766 |

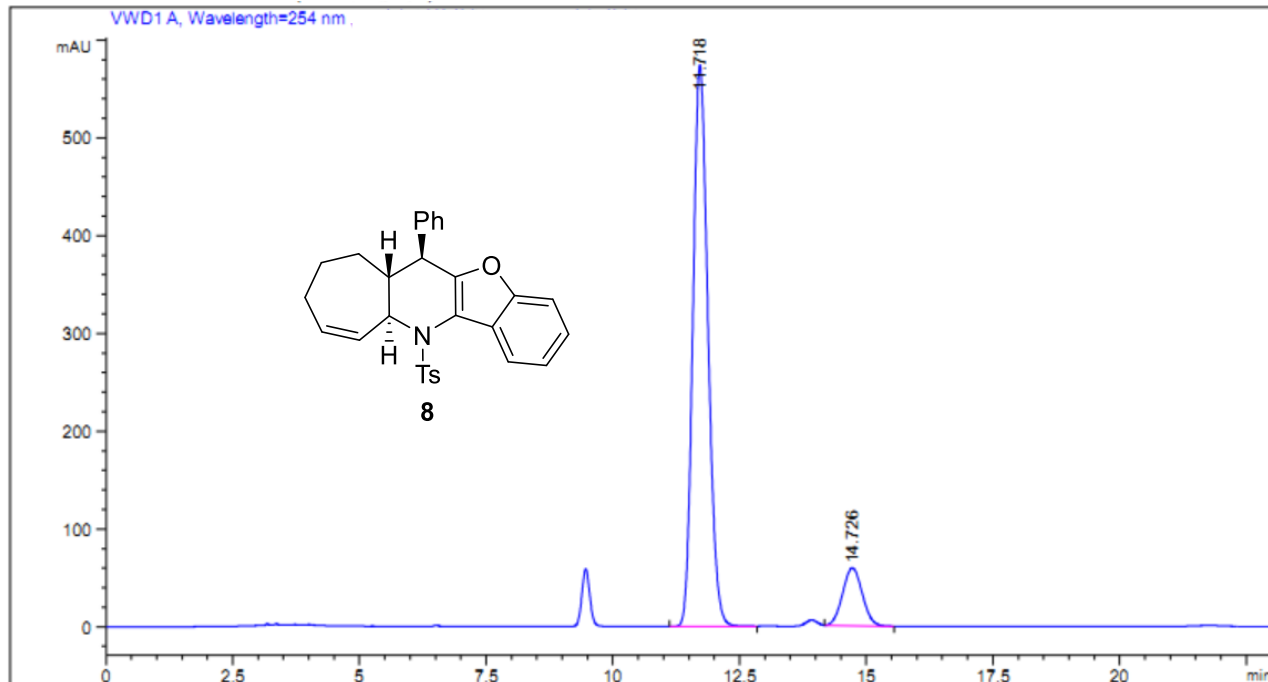

| # | [min]  | [min] | [min]  | [mAU*s]    | [mAU]     | %       |
|---|--------|-------|--------|------------|-----------|---------|
| 1 | 11.718 | BBA   | 0.3223 | 1.18433e4  | 573.84747 | 88.1813 |
| 2 | 14.726 | BBA   | 0.4212 | 1587.31763 | 59.08039  | 11.8187 |

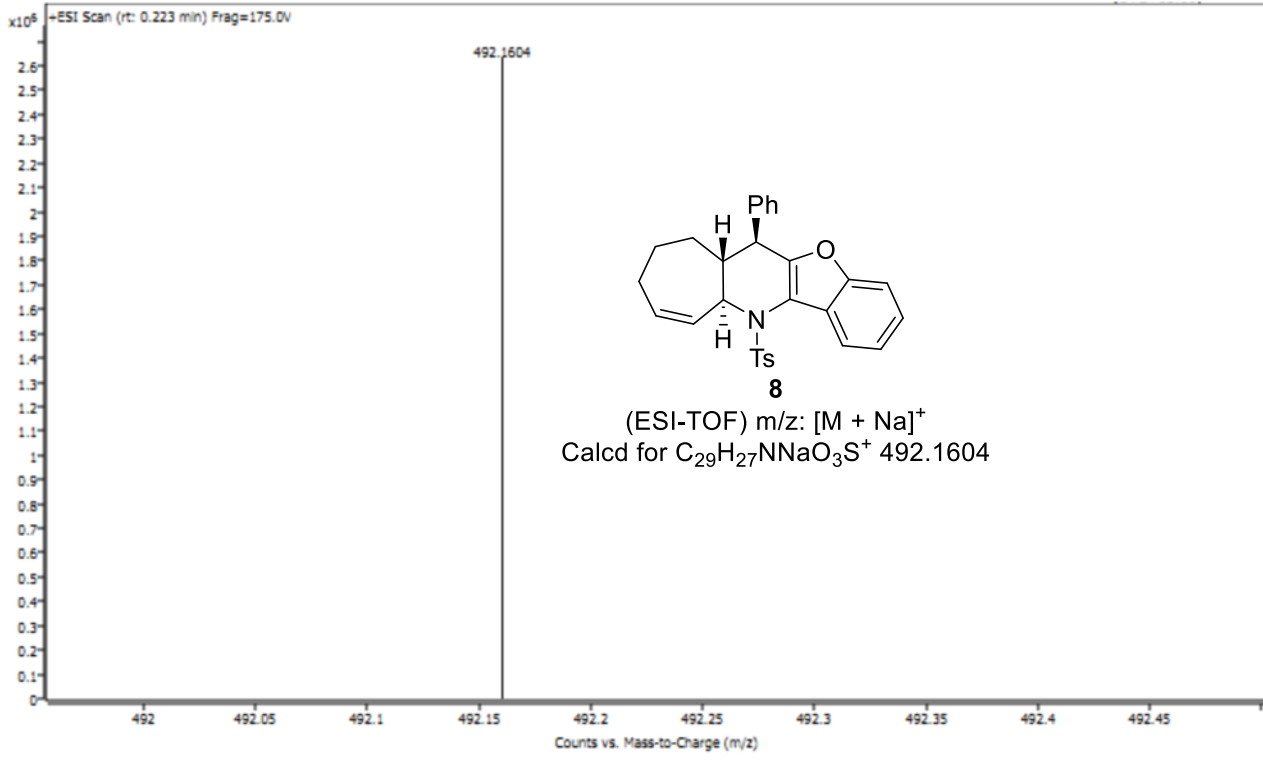

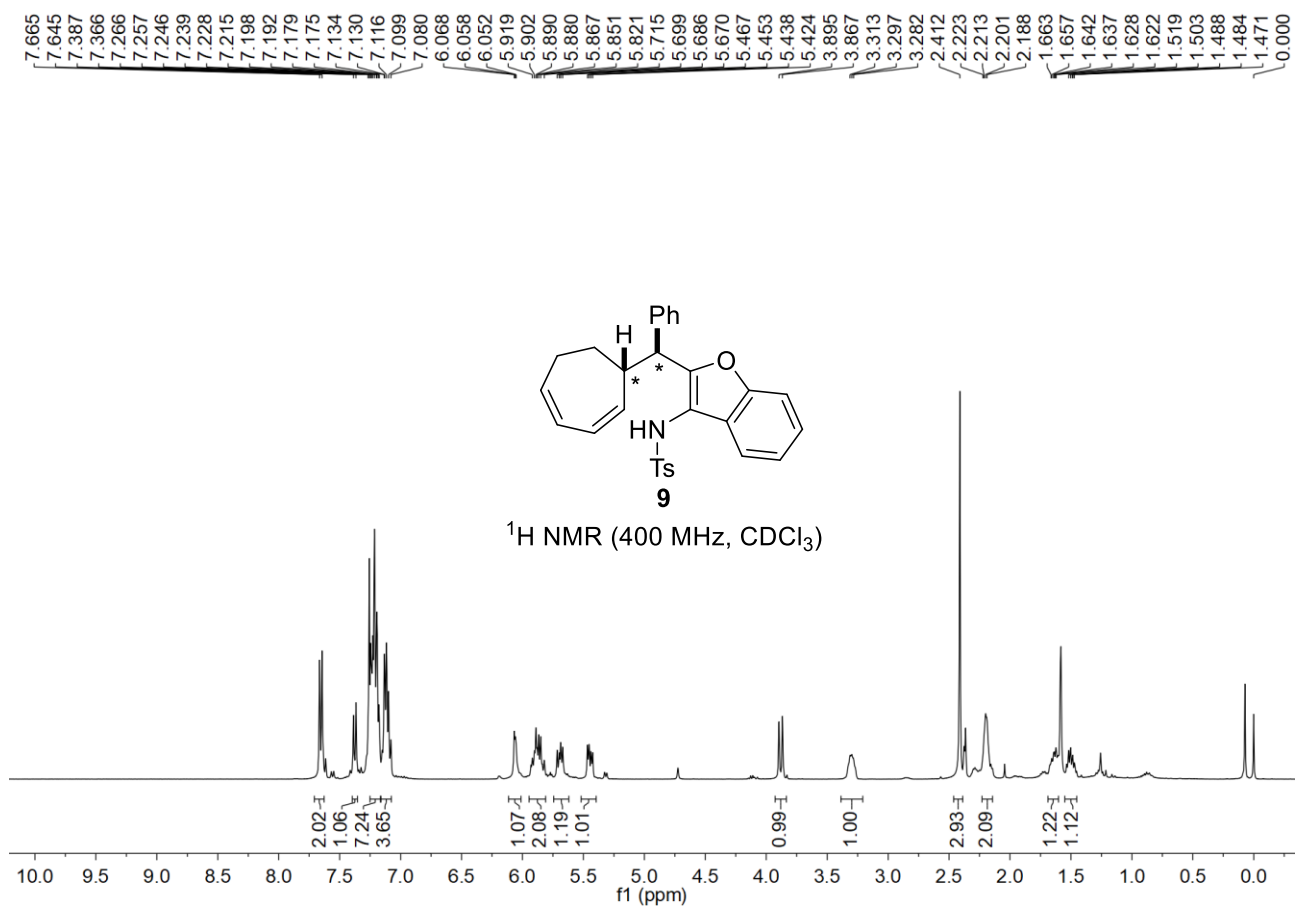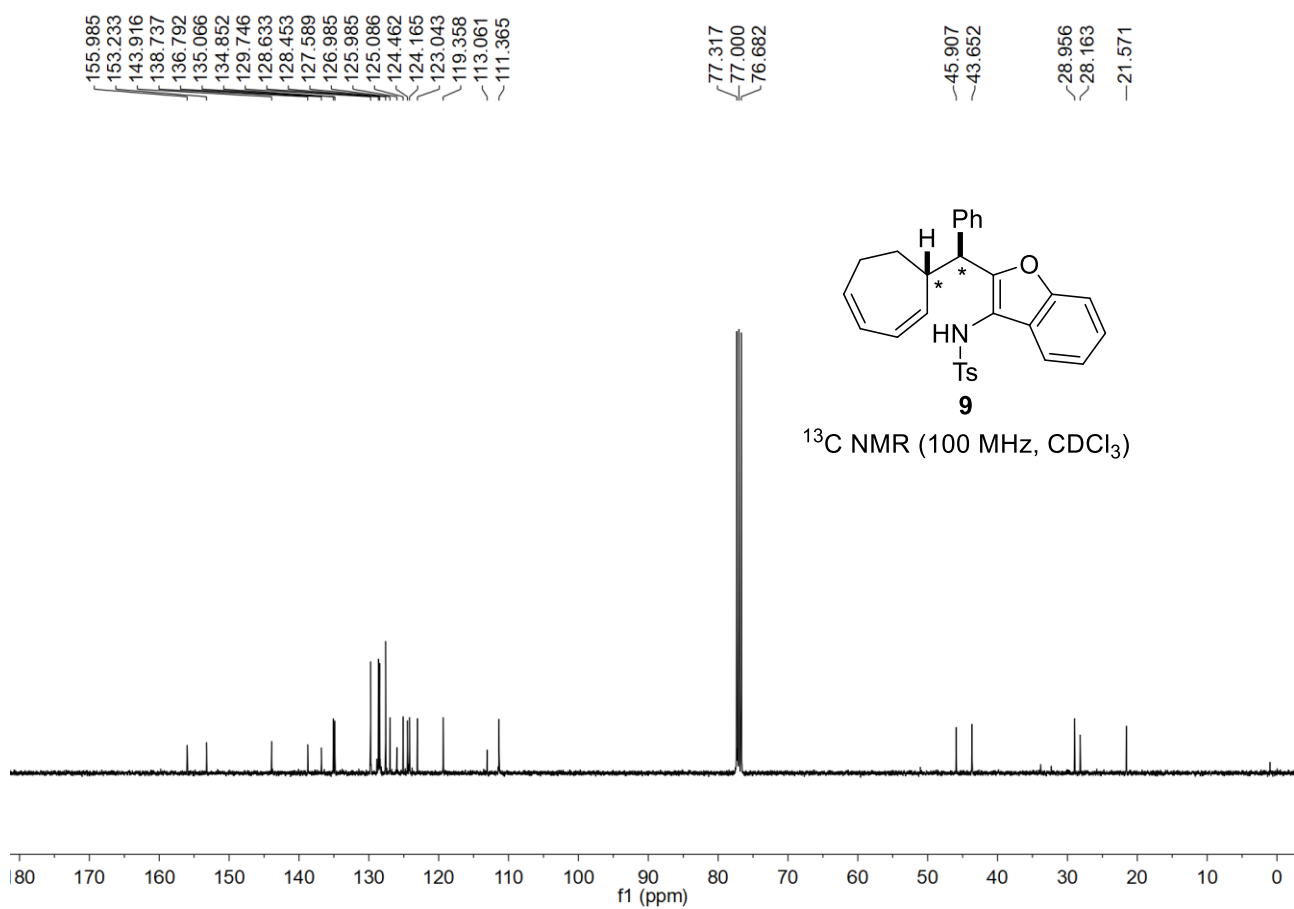

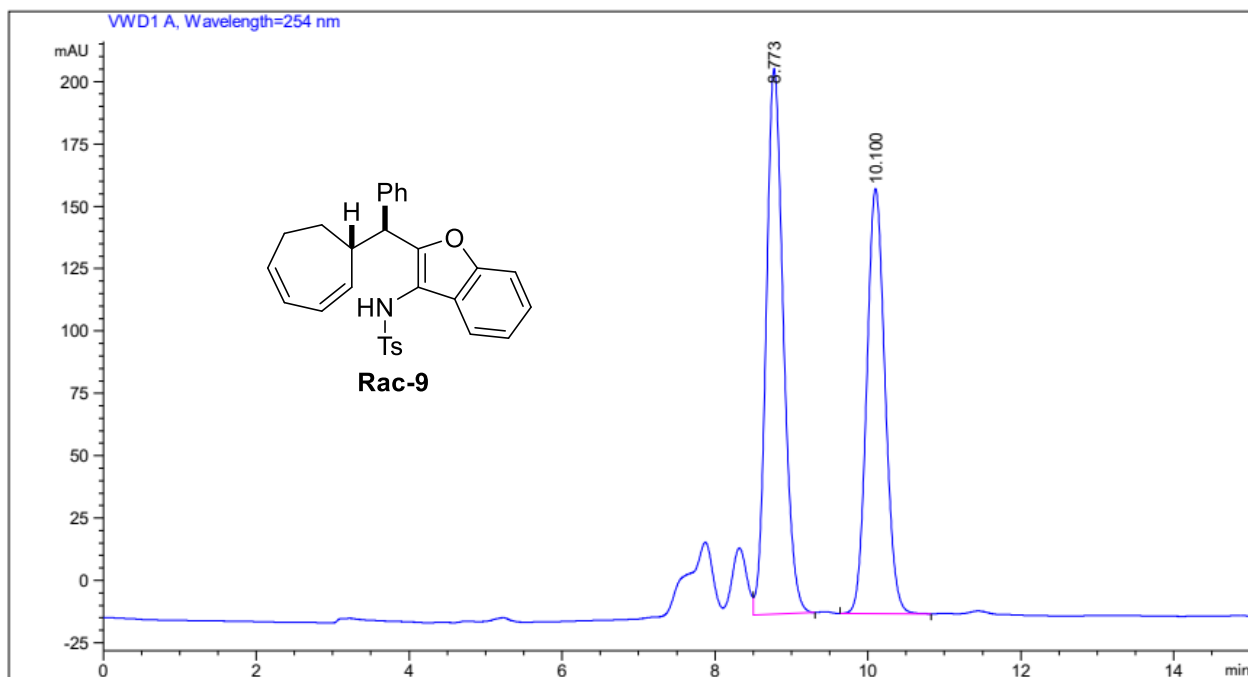

| # | [min]     | [min]  | [mAU*s]    | [mAU]     | %       |
|---|-----------|--------|------------|-----------|---------|
| 1 | 8.773 VB  | 0.2406 | 3418.23633 | 218.65475 | 54.6941 |
| 2 | 10.100 BB | 0.2594 | 2831.50293 | 170.40413 | 45.3059 |

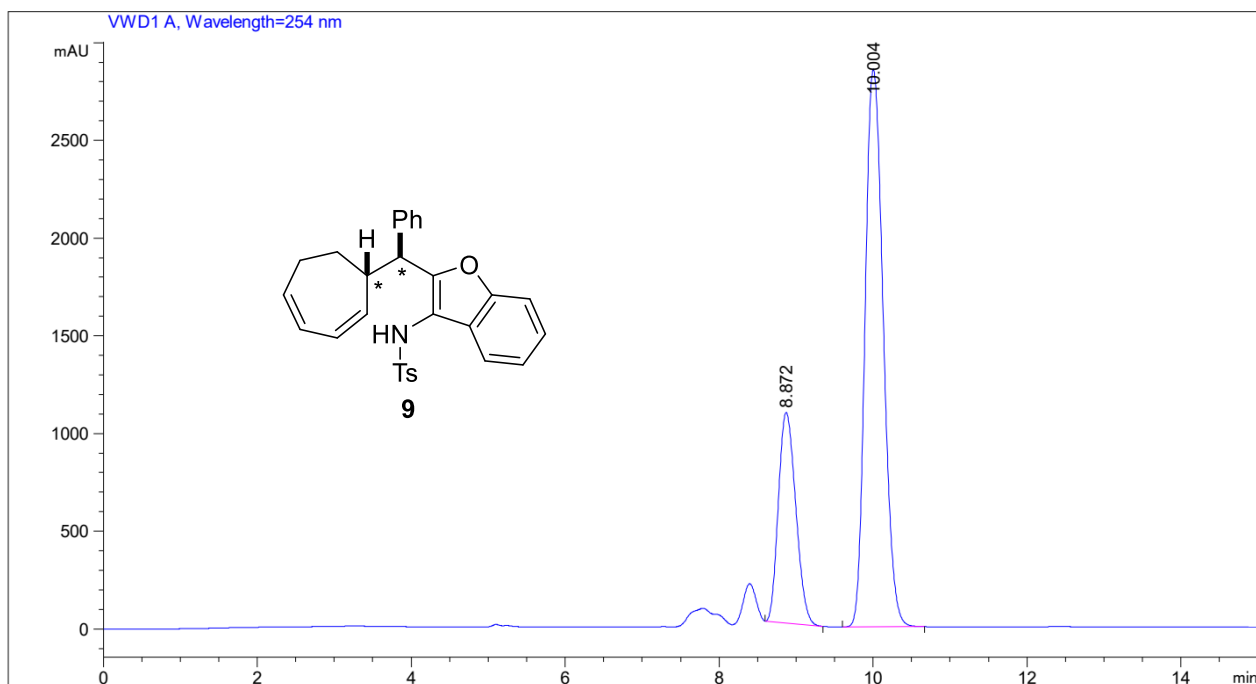

| # | [min]      | [min]  | [mAU*s]   | [mAU]      | %       |
|---|------------|--------|-----------|------------|---------|
| 1 | 8.872 BBA  | 0.2502 | 1.69306e4 | 1078.31177 | 26.6872 |
| 2 | 10.004 BBA | 0.2572 | 4.65102e4 | 2852.03198 | 73.3128 |

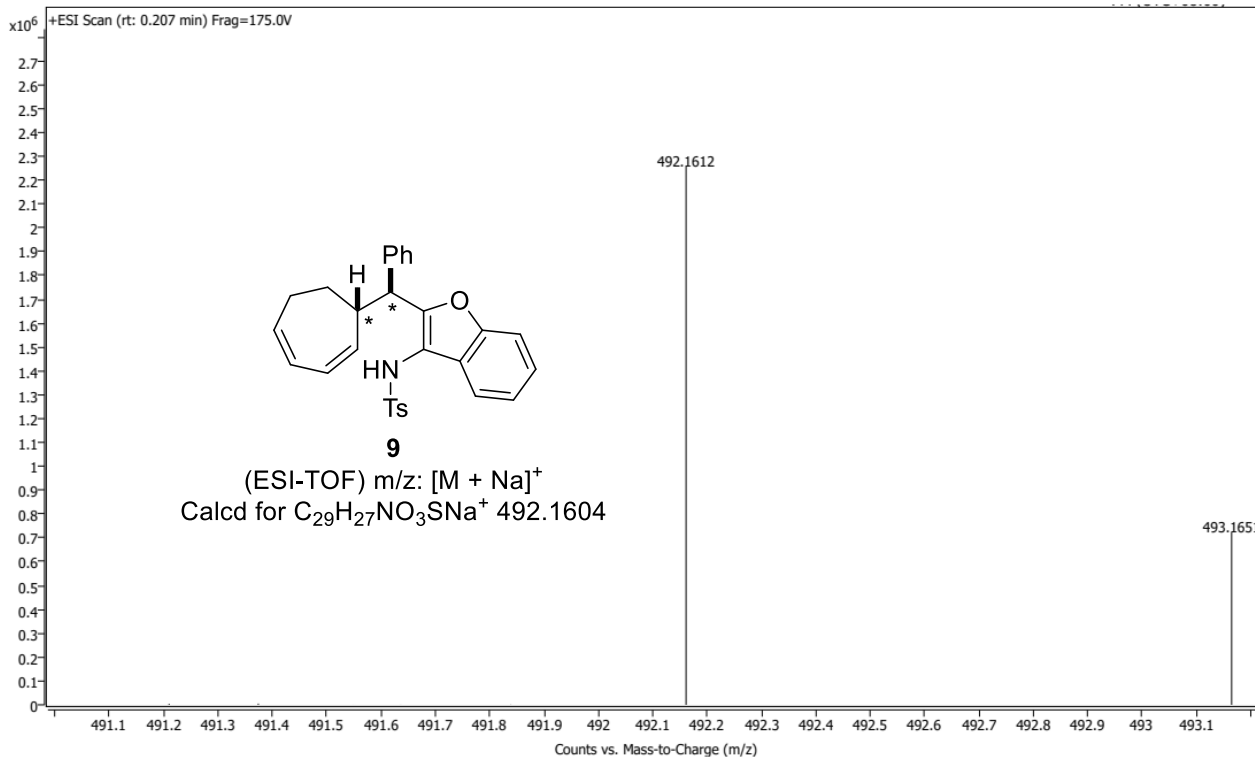

8.253  
8.250  
8.247  
8.233  
8.230  
8.228  
7.785  
7.776  
7.769  
7.762  
7.670  
7.665  
7.661  
7.655  
7.649  
7.645  
7.576  
7.555  
7.466  
7.460  
7.451  
7.442  
7.347  
7.338  
7.335  
7.326  
7.316  
7.306  
7.269  
7.265  
7.262  
7.255  
7.224  
7.222  
7.219  
6.486  
6.482  
6.465  
6.460  
5.900  
5.880  
5.873  
5.812  
5.789  
5.781  
5.680  
5.671  
5.591  
5.560  
5.311  
5.308  
5.302  
4.216  
4.188  
2.450  
2.277  
2.273  
0.000

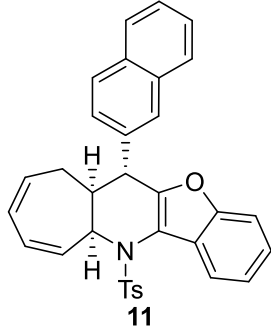

<sup>1</sup>H NMR (400 MHz, CDCl<sub>3</sub>)

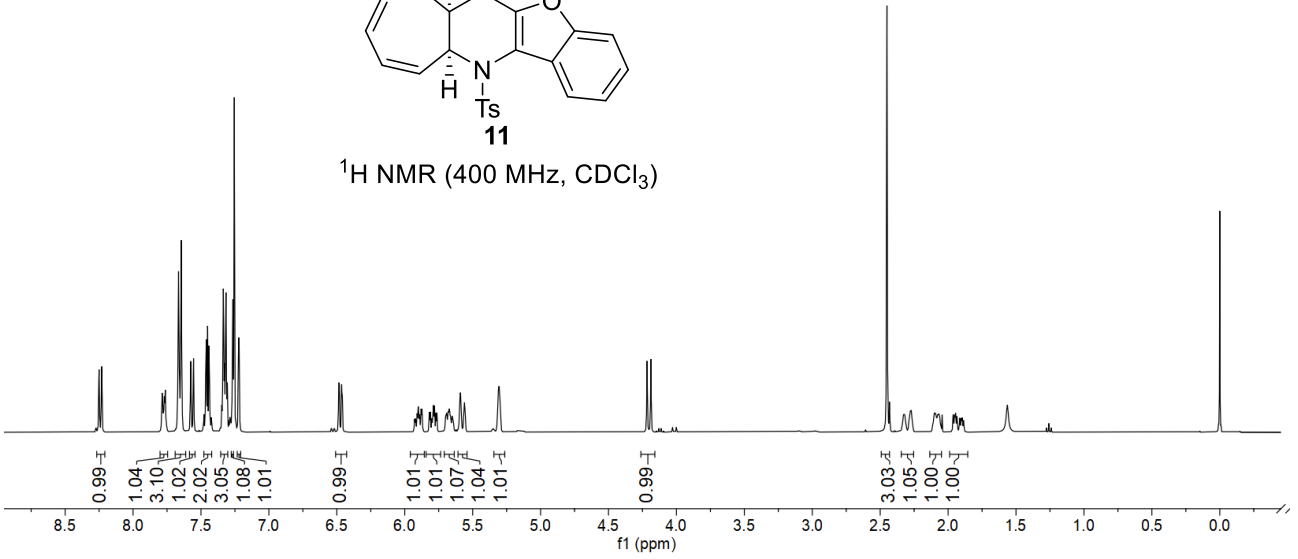

154.429  
150.363  
144.289  
136.305  
134.938  
133.281  
132.836  
132.688  
130.658  
129.977  
128.072  
128.000  
127.622  
127.515  
127.476  
126.198  
125.889  
125.749  
125.578  
124.629  
124.486  
123.093  
122.377  
117.391  
111.263  
77.317  
77.000  
76.683  
62.671  
41.322  
38.507  
29.029  
21.680

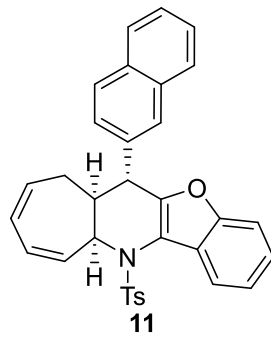

<sup>13</sup>C NMR (100 MHz, CDCl<sub>3</sub>)

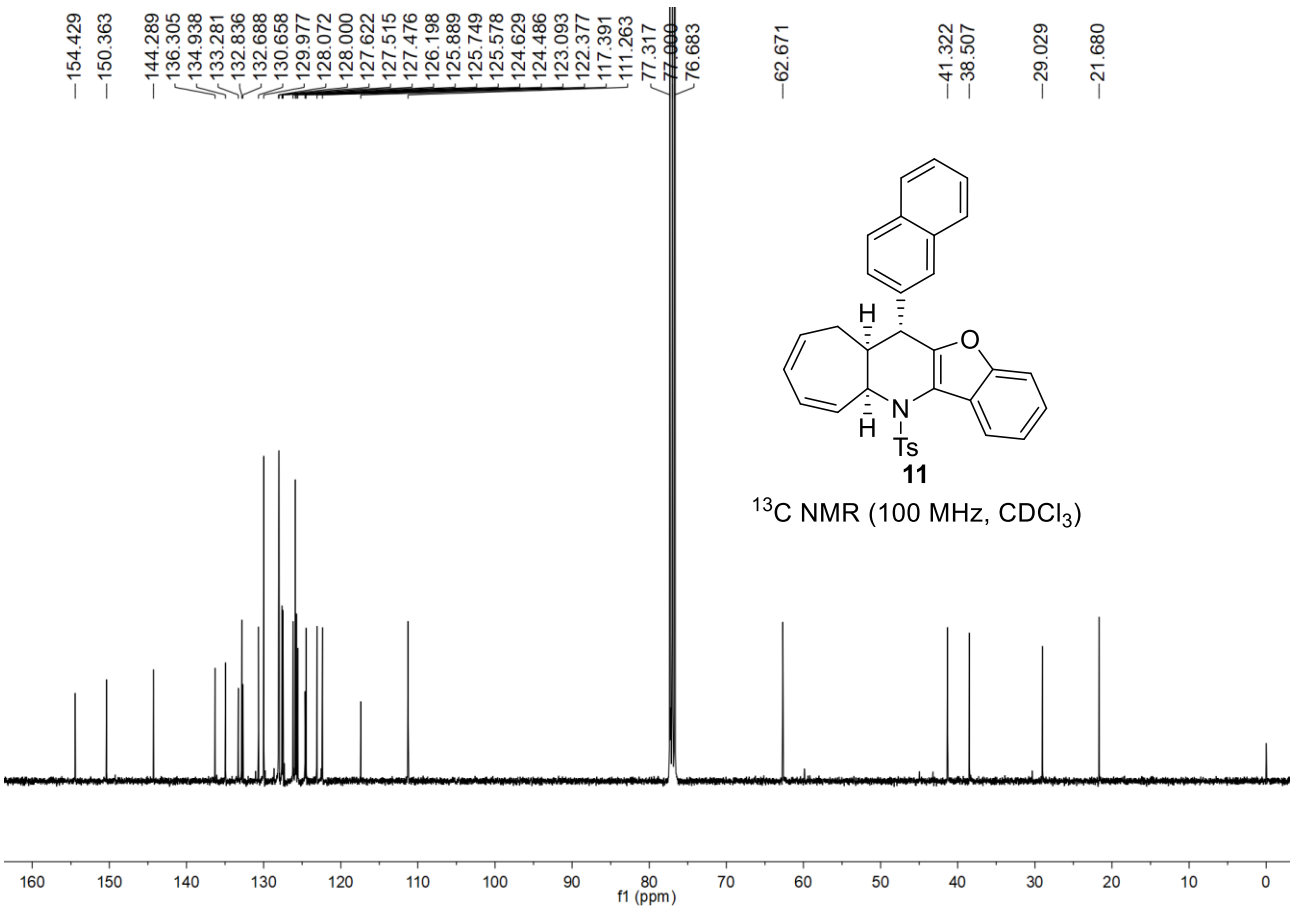



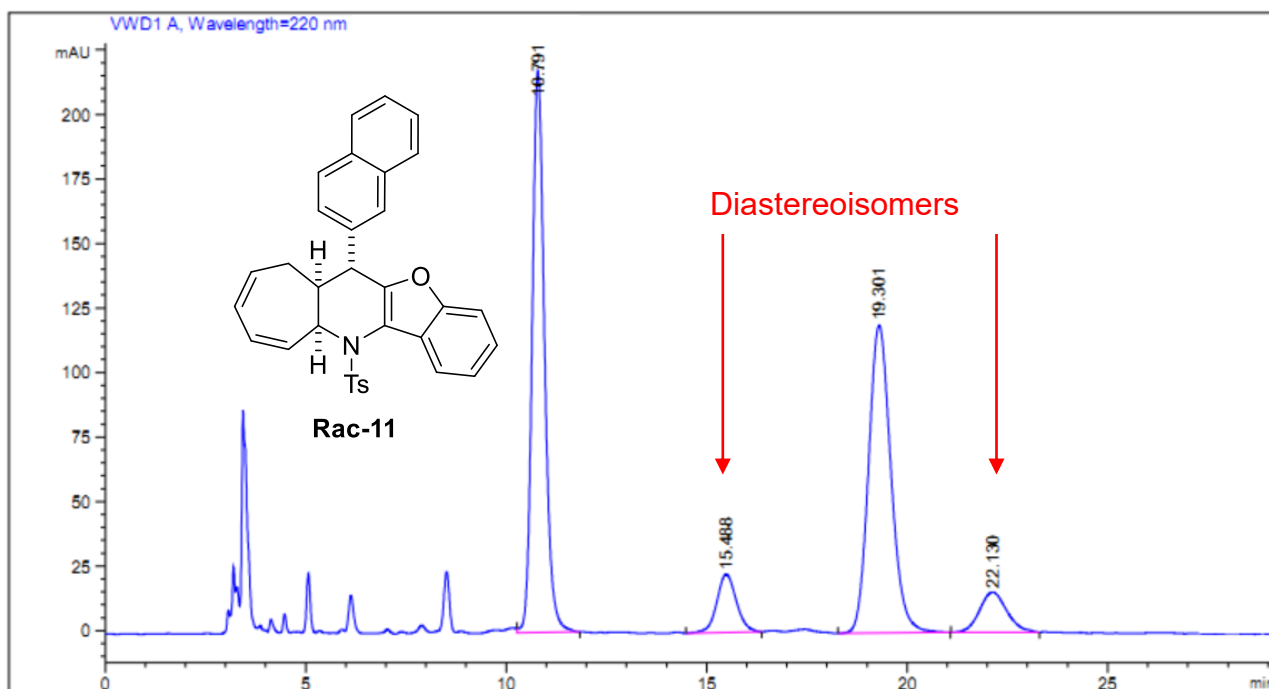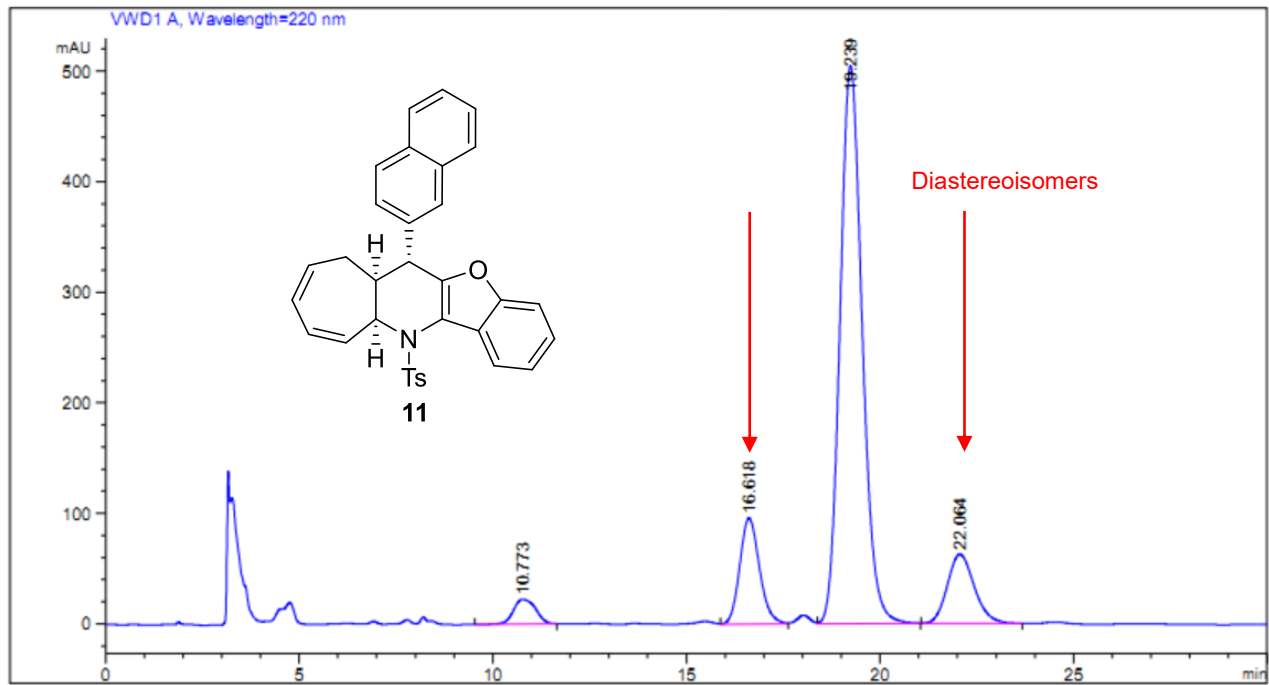

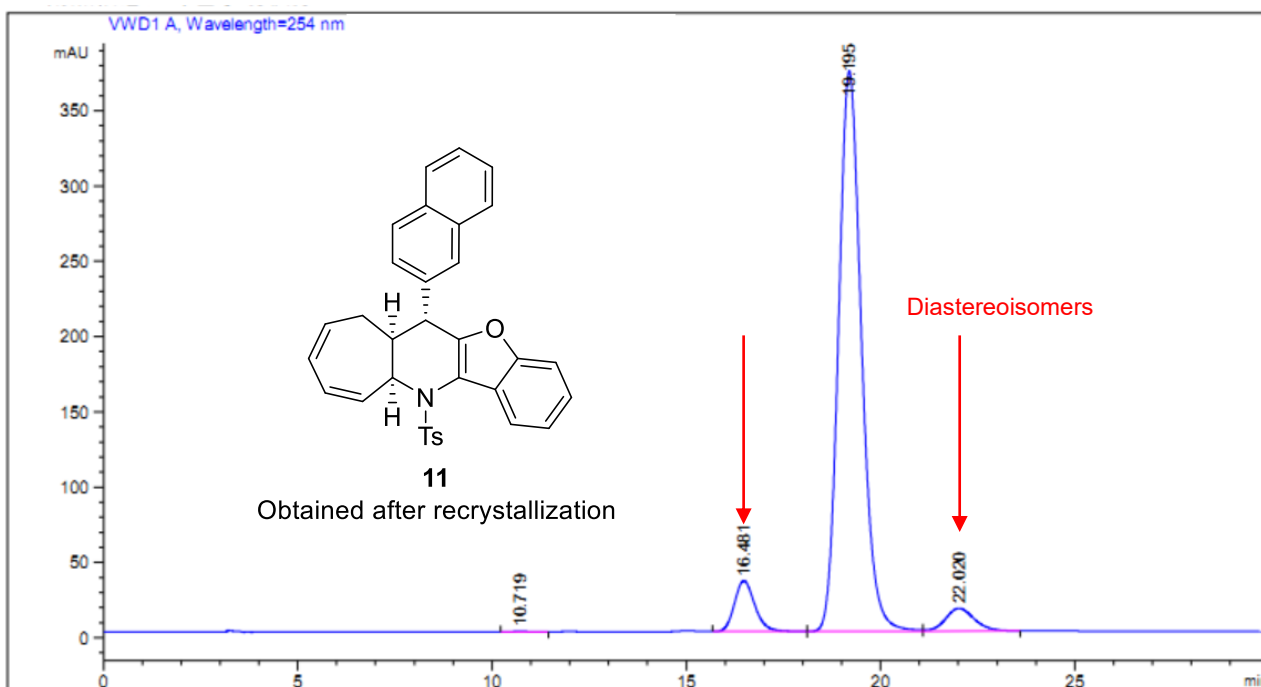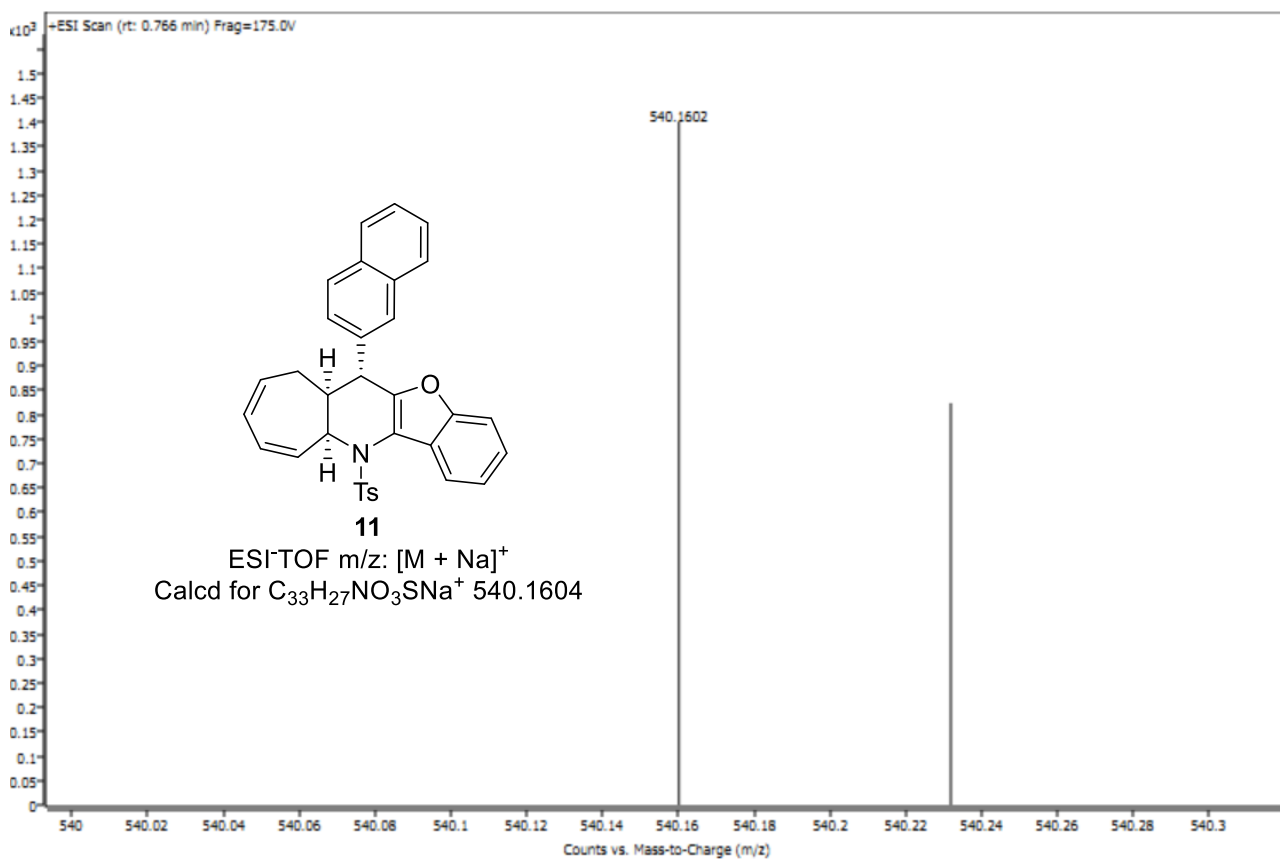

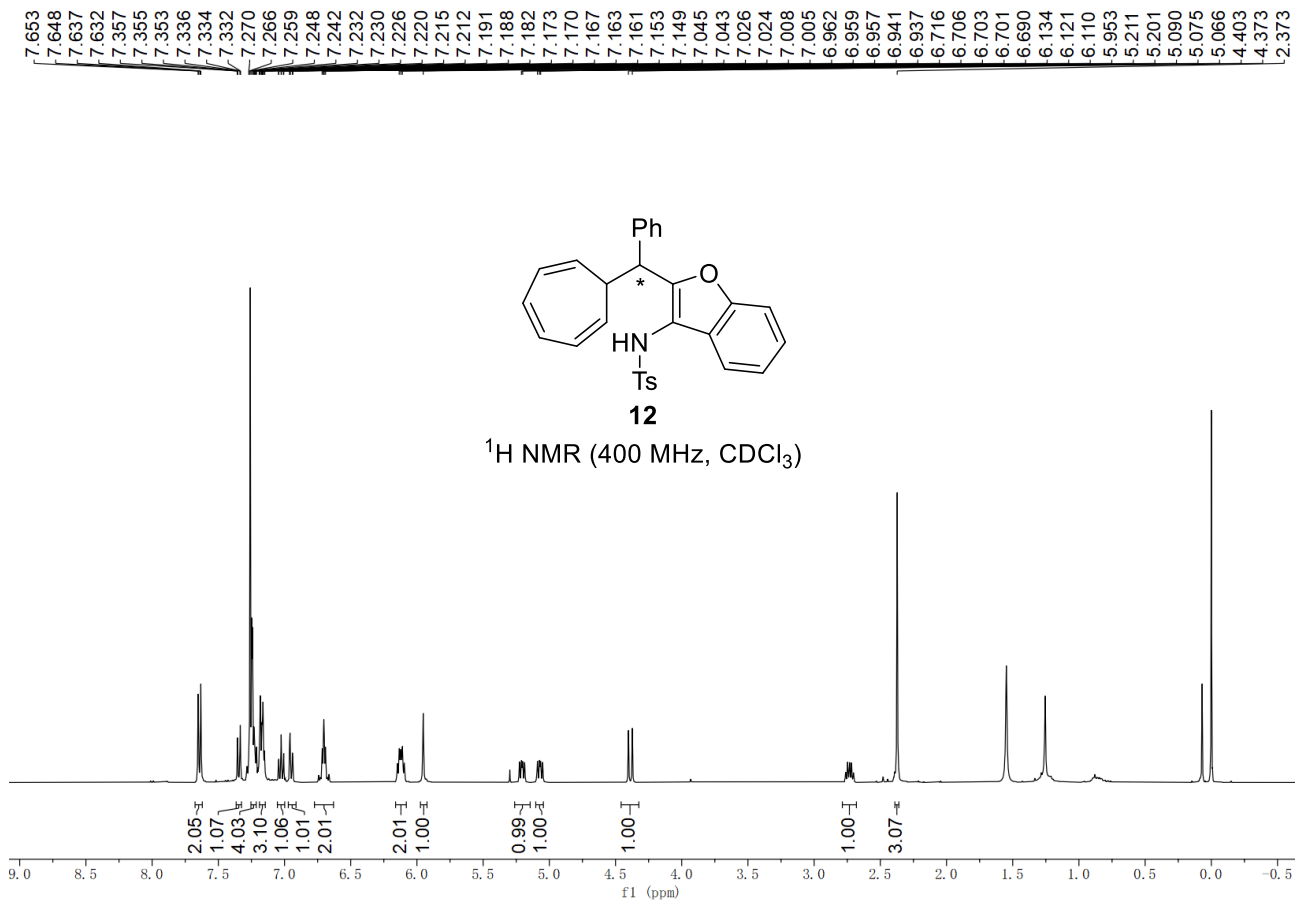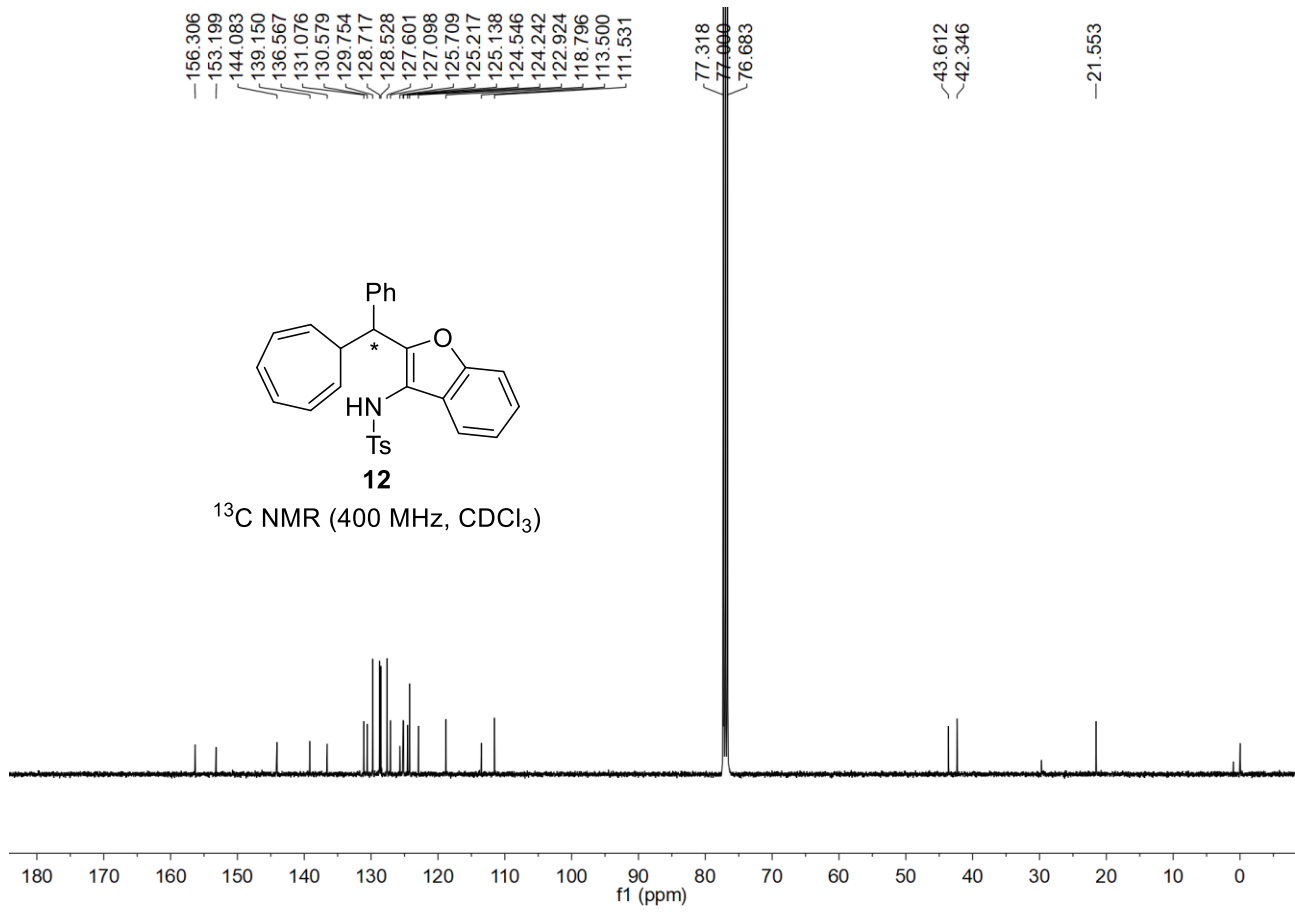

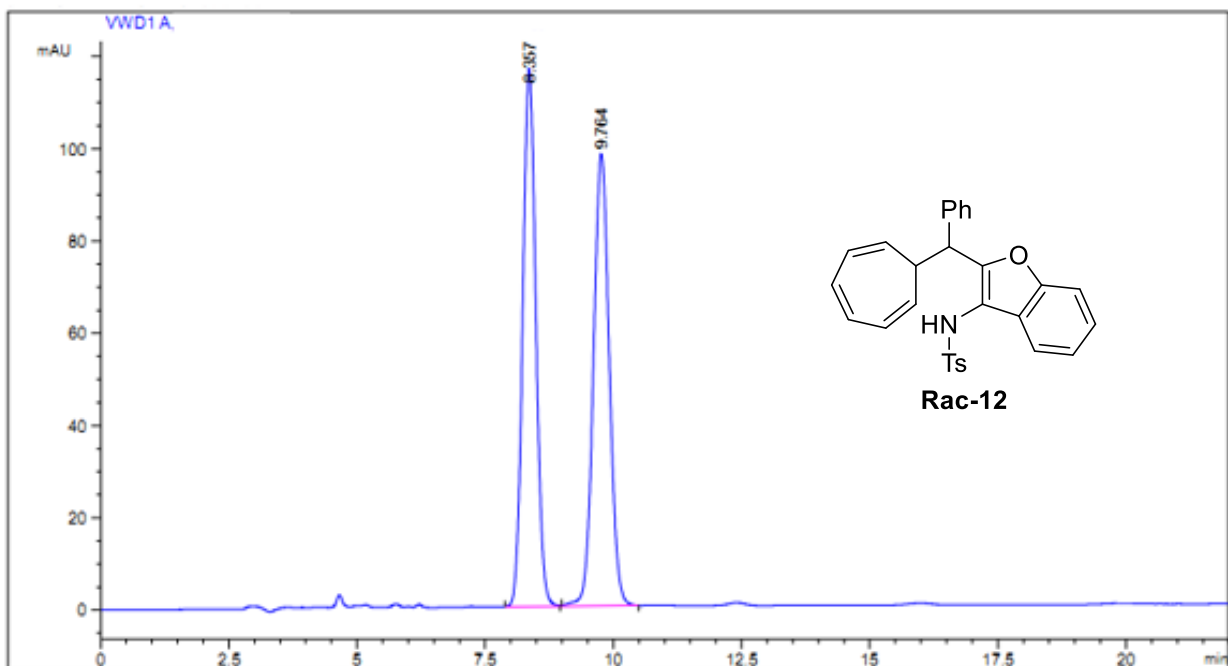

| # | [min]    | [min]  | mAU        | *s        | [mAU ]  | % |
|---|----------|--------|------------|-----------|---------|---|
| 1 | 8.357 BB | 0.2756 | 2071.52319 | 116.67725 | 49.6487 |   |
| 2 | 9.764 BB | 0.3333 | 2100.84229 | 97.90084  | 50.3513 |   |

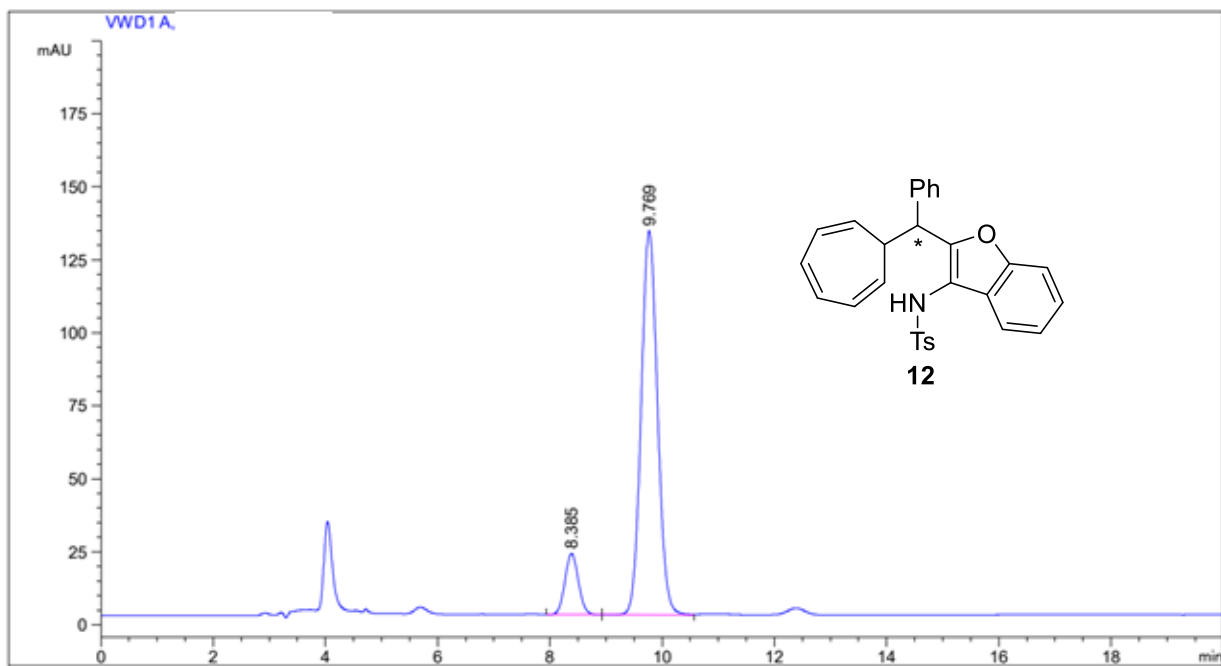

| # | [min]    | [min]  | mAU        | *s        | [mAU ]  | % |
|---|----------|--------|------------|-----------|---------|---|
| 1 | 8.385 BB | 0.2596 | 350.31448  | 20.90230  | 11.6298 |   |
| 2 | 9.769 BV | 0.3150 | 2661.90674 | 131.40013 | 88.3702 |   |

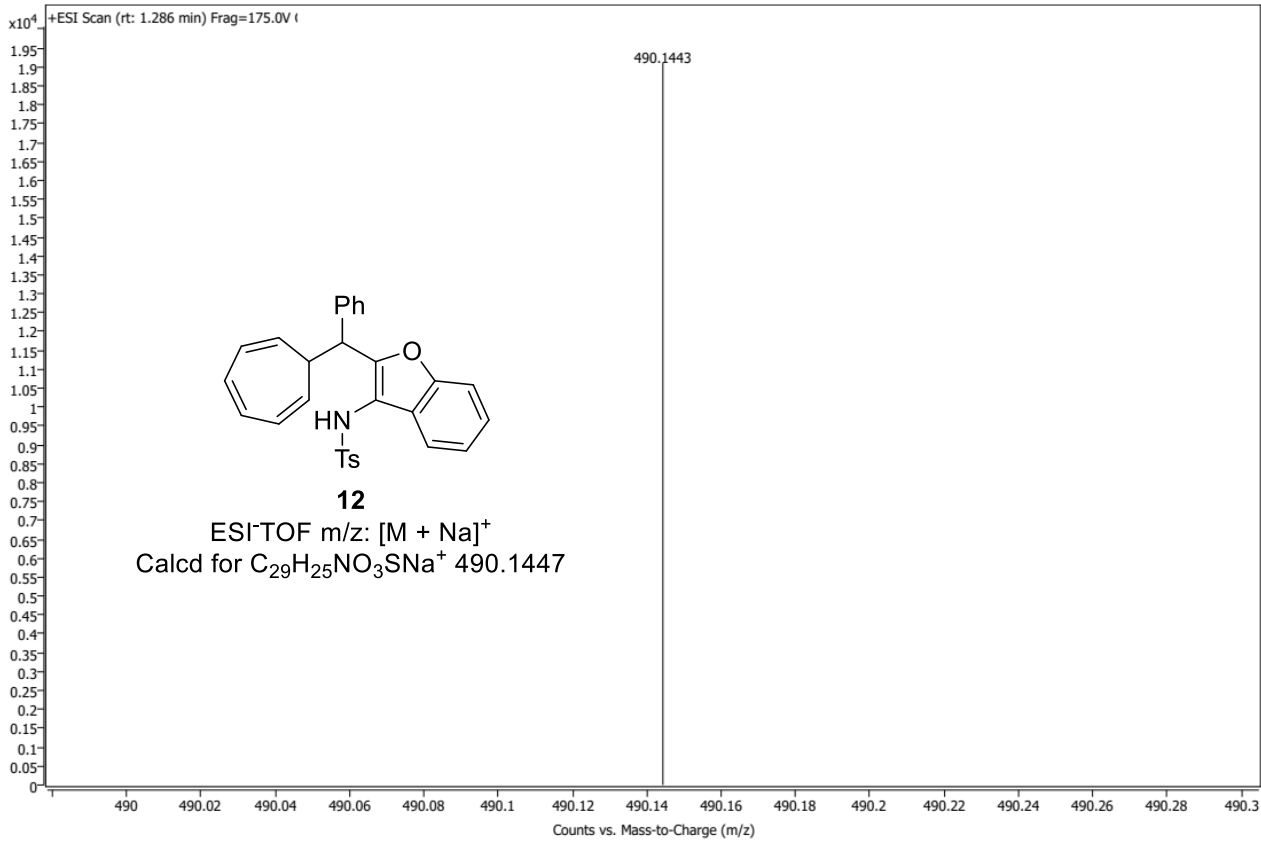

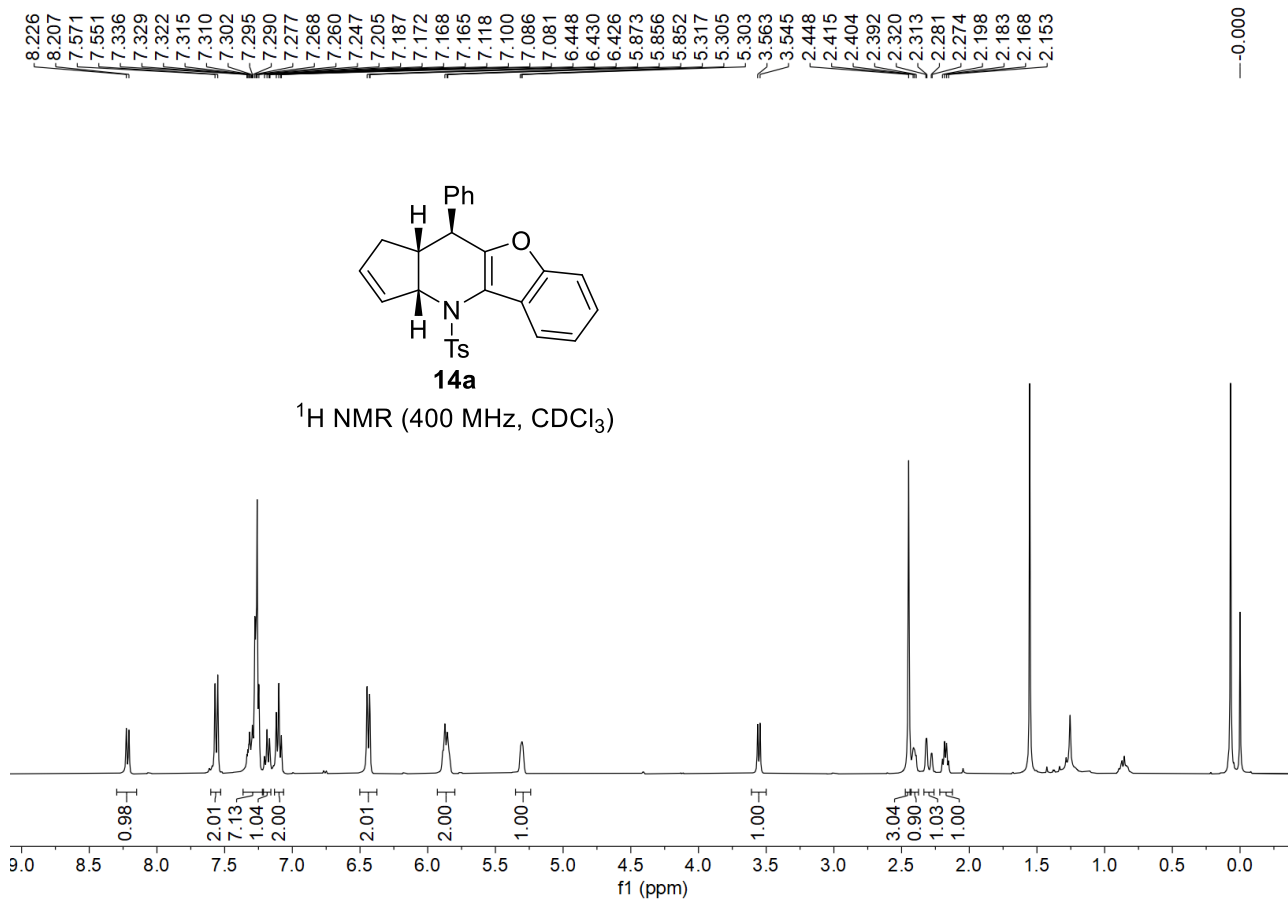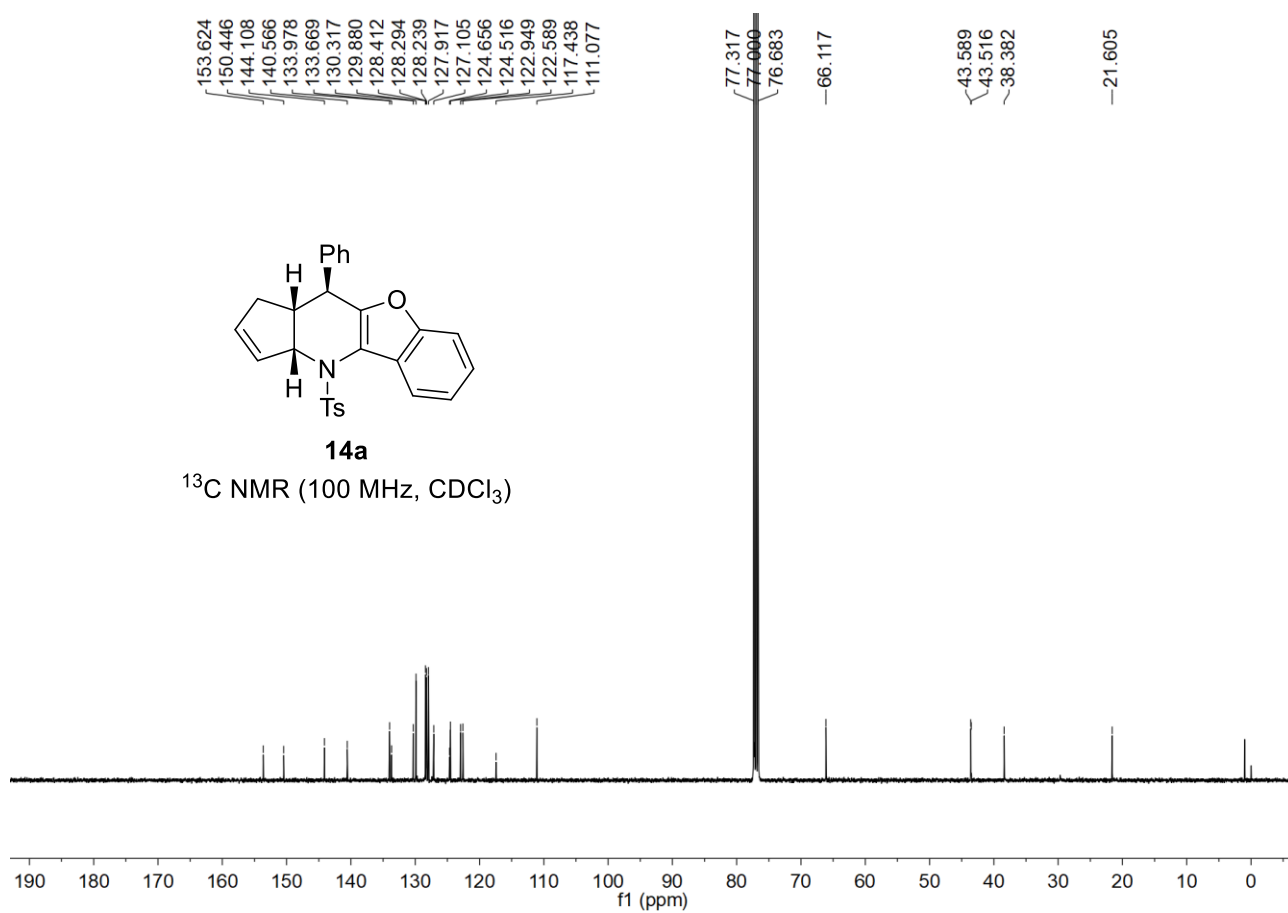

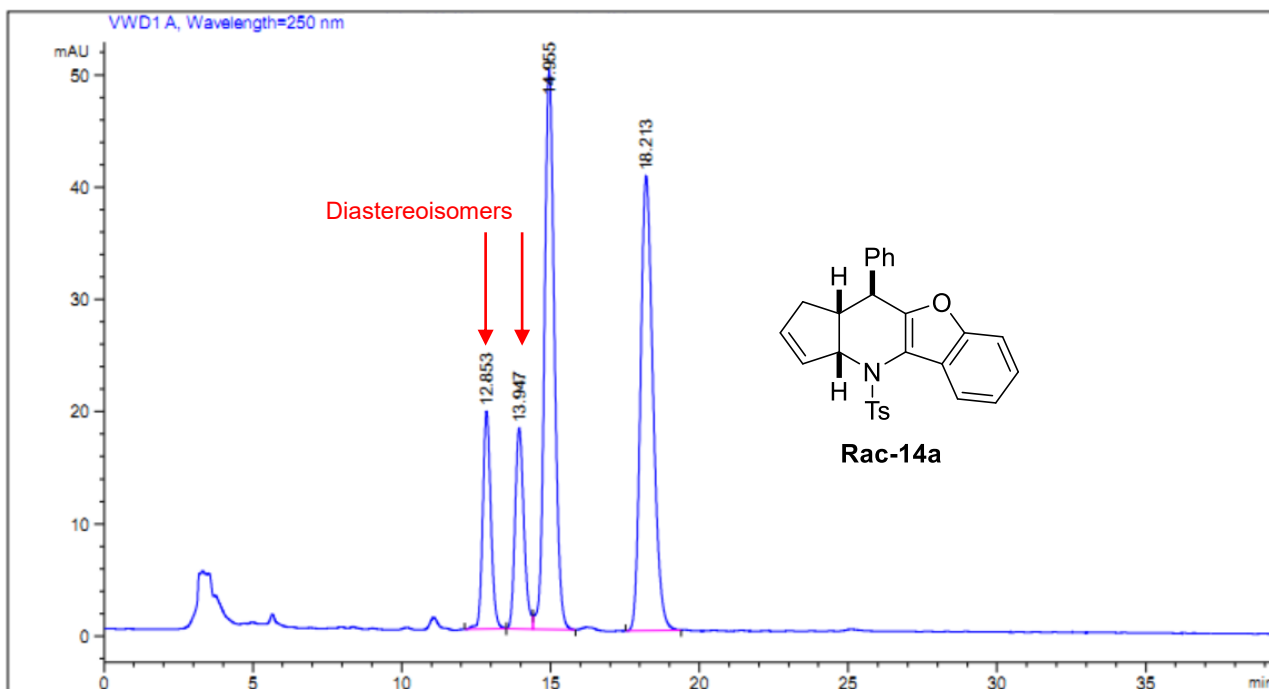

| # | [min]     | [min]  | [mAU*s]    | [mAU]    | %       |
|---|-----------|--------|------------|----------|---------|
| 1 | 12.853 BB | 0.2916 | 366.40060  | 19.40357 | 11.9039 |
| 2 | 13.947 BV | 0.3182 | 369.78287  | 17.89857 | 12.0138 |
| 3 | 14.955 VB | 0.3605 | 1160.38916 | 49.83633 | 37.6996 |
| 4 | 18.213 BB | 0.4510 | 1181.41772 | 40.50112 | 38.3828 |

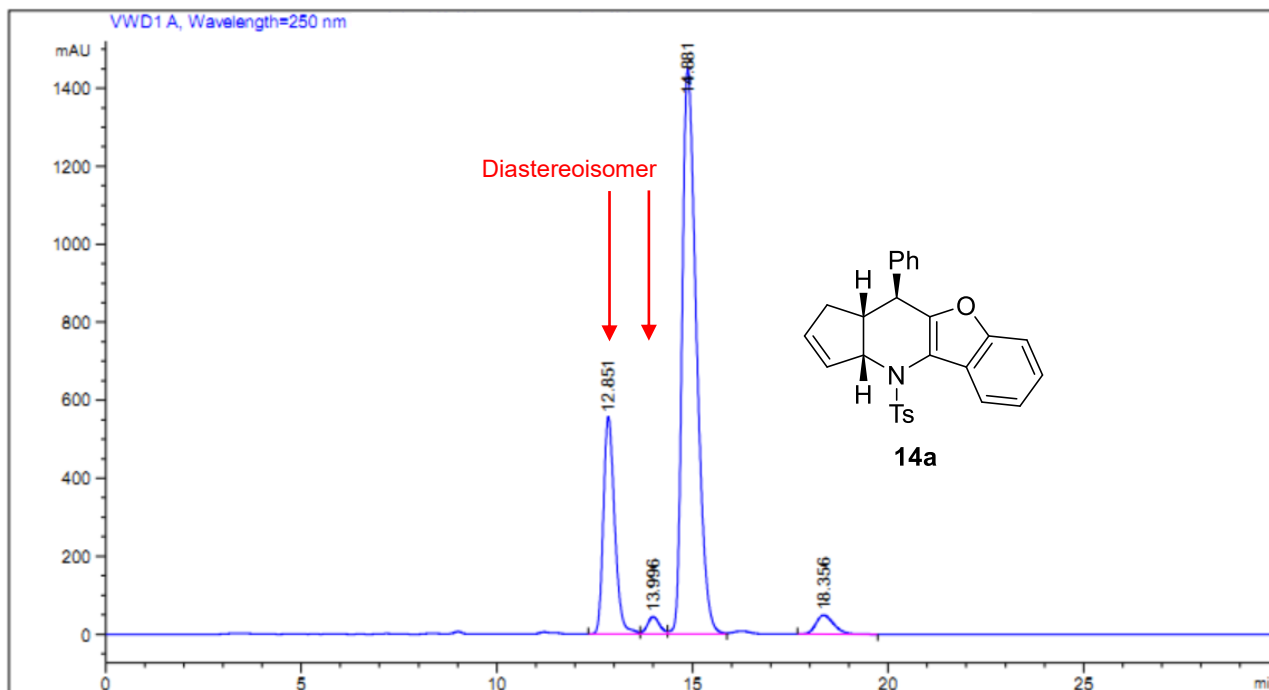

| # | [min]     | [min]  | [mAU*s]    | [mAU]      | %       |
|---|-----------|--------|------------|------------|---------|
| 1 | 12.851 BV | 0.3094 | 1.11714e4  | 557.65723  | 22.1517 |
| 2 | 13.996 VV | 0.3319 | 960.78424  | 44.50592   | 1.9051  |
| 3 | 14.881 VV | 0.3922 | 3.67631e4  | 1448.58972 | 72.8971 |
| 4 | 18.356 BB | 0.4811 | 1536.18640 | 48.95470   | 3.0461  |

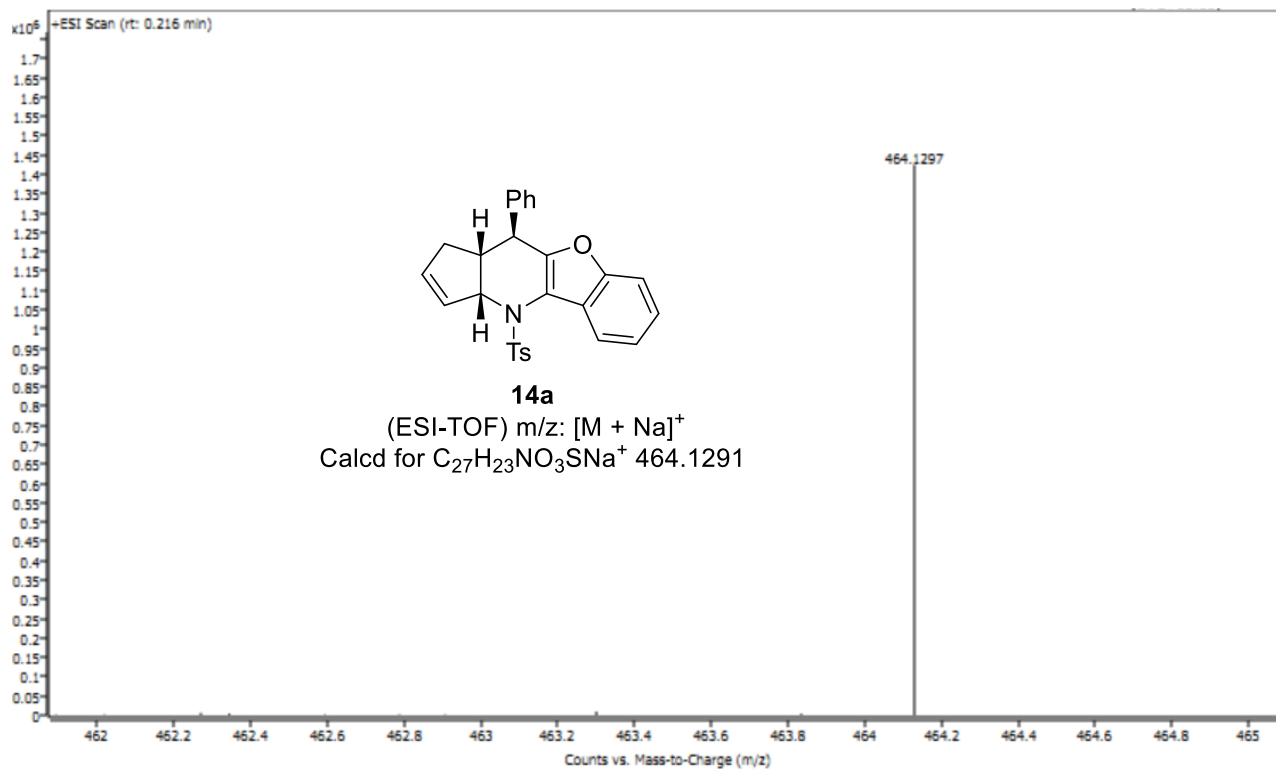



8.224  
8.221  
8.218  
8.205  
8.202  
8.199  
7.563  
7.558  
7.547  
7.542  
7.537  
7.316  
7.311  
7.300  
7.297  
7.291  
7.285  
7.283  
7.279  
7.276  
7.270  
7.264  
7.259  
7.243  
7.043  
7.023  
7.004  
6.738  
6.736  
6.732  
6.729  
6.711  
6.182  
6.177  
6.172  
6.018  
6.015  
6.012  
5.999  
5.996  
5.992  
5.874  
5.869  
5.865  
5.845  
5.841  
5.838  
3.755  
3.530  
3.512  
2.418  
2.407  
2.397  
2.397  
2.316  
2.309  
2.149  
2.133  
0.000

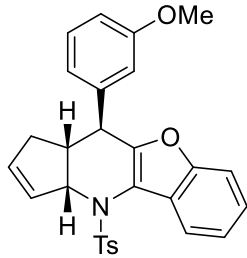

**14b**

$^1\text{H NMR}$  (400 MHz,  $\text{CDCl}_3$ )

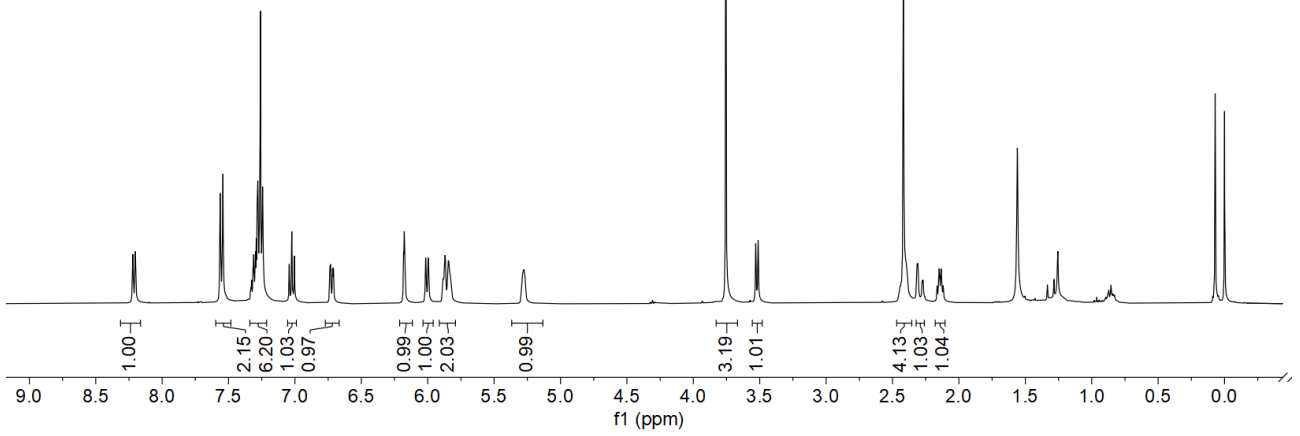

153.638  
150.204  
144.326  
142.032  
134.004  
133.476  
130.256  
129.932  
129.357  
128.065  
124.666  
124.504  
122.922  
122.616  
120.258  
117.520  
115.006  
111.184  
111.096  
77.319  
77.000  
76.684  
66.047  
55.121  
43.434  
43.200  
38.319  
21.577

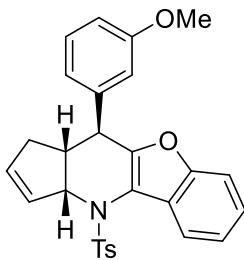

**14b**

$^{13}\text{C NMR}$  (100 MHz,  $\text{CDCl}_3$ )

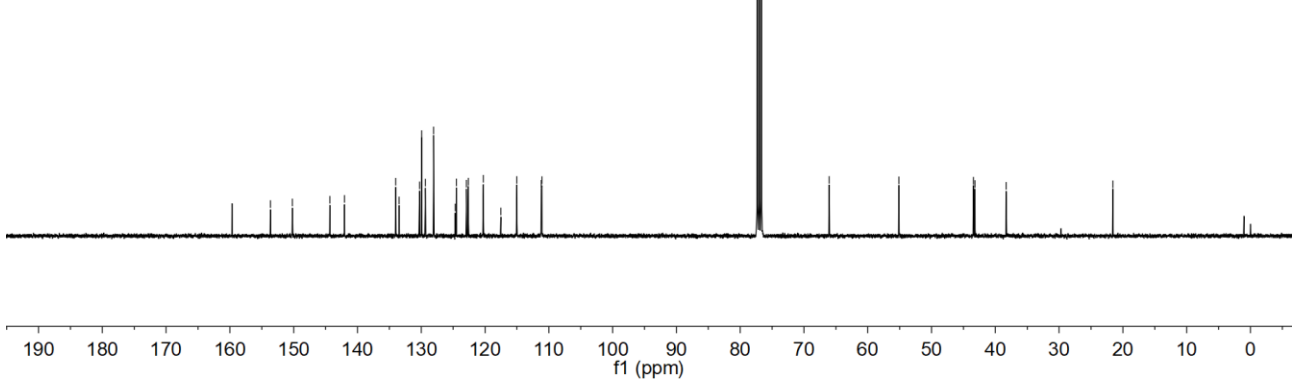

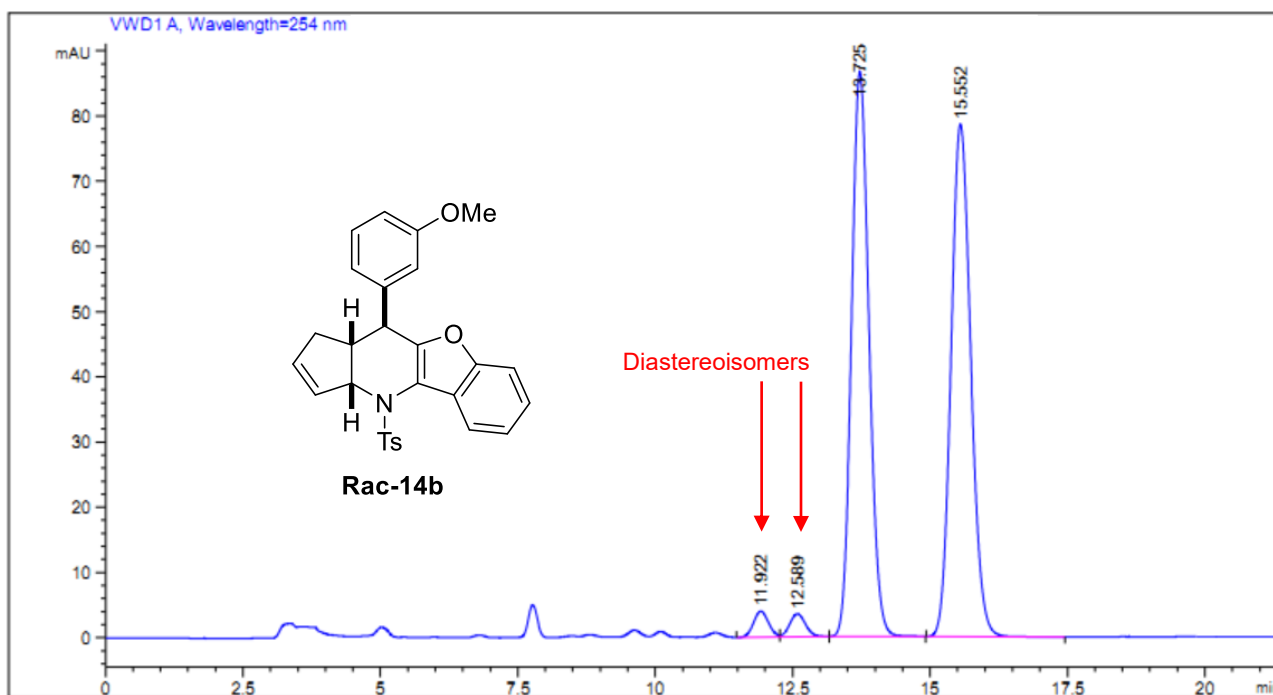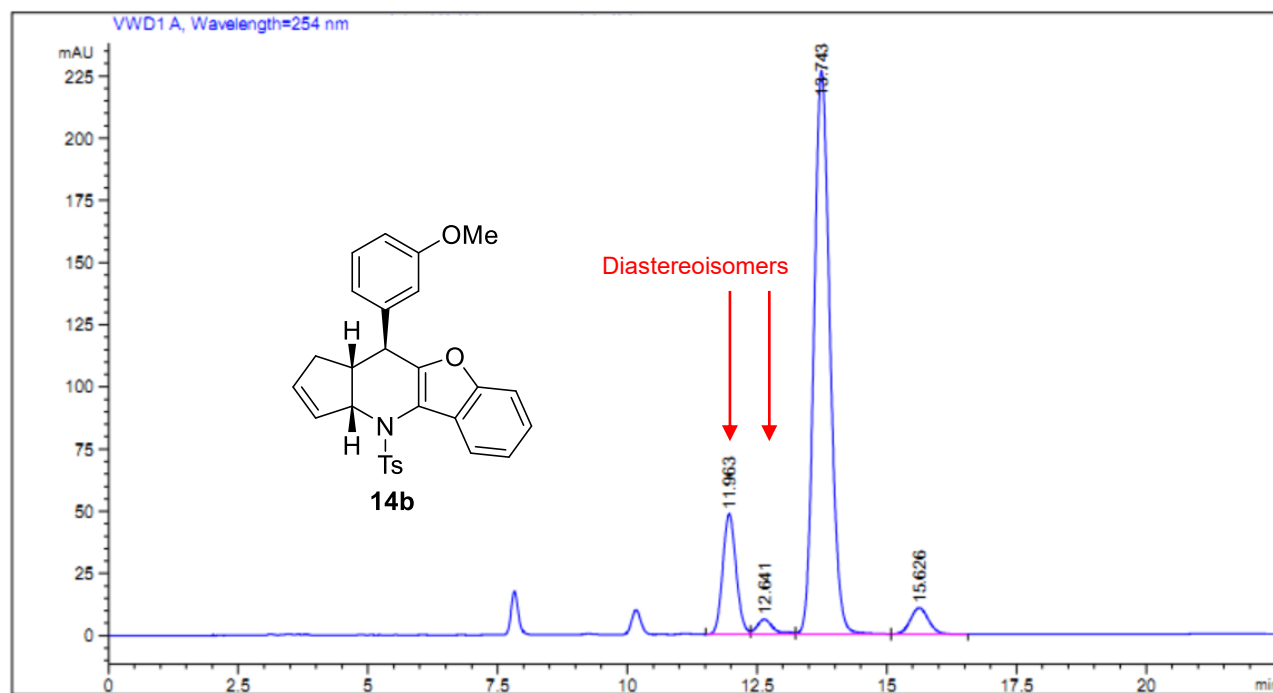

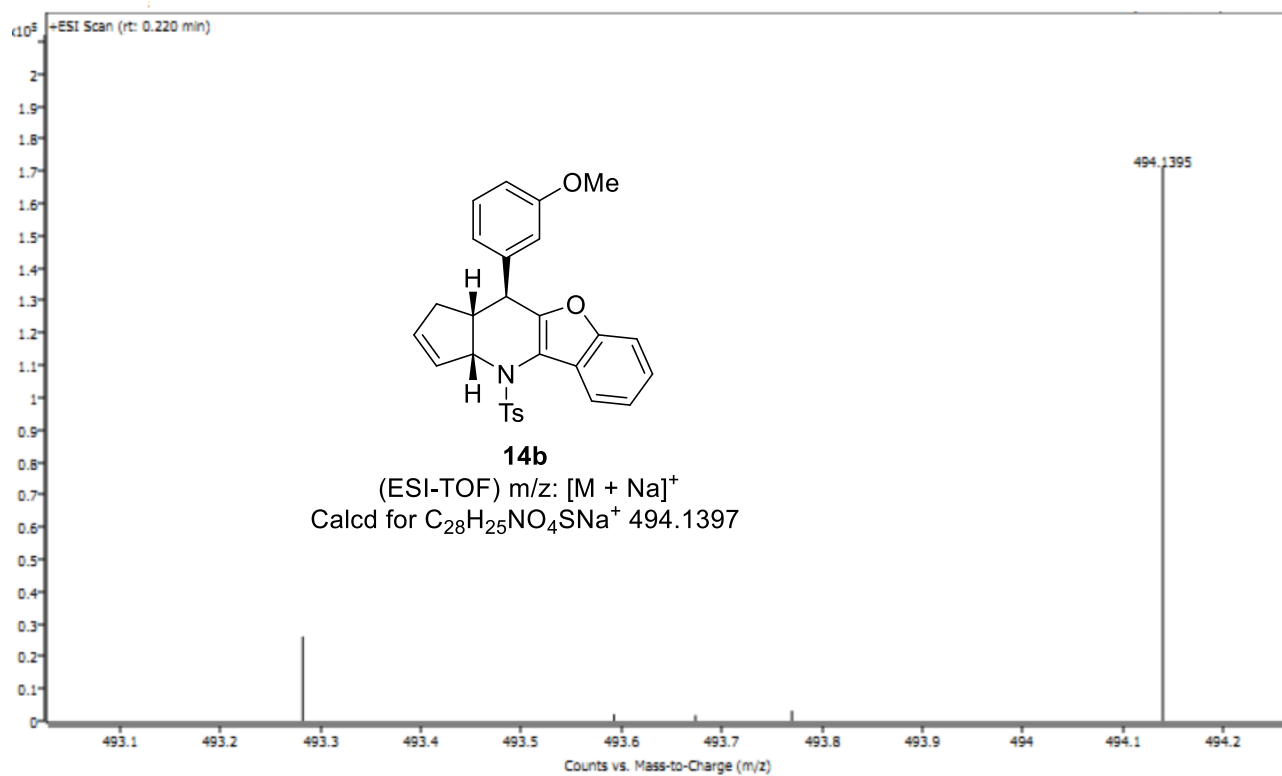

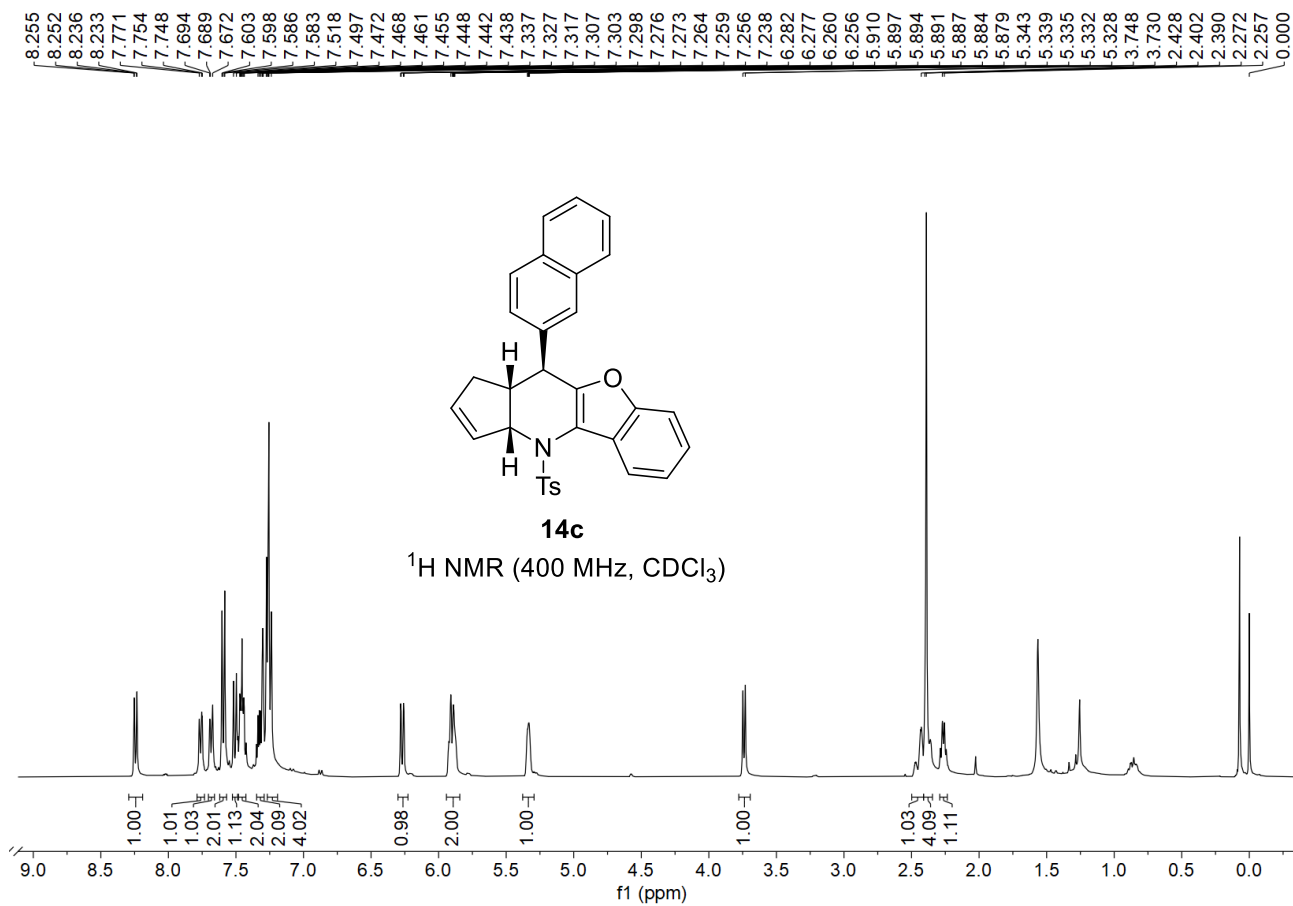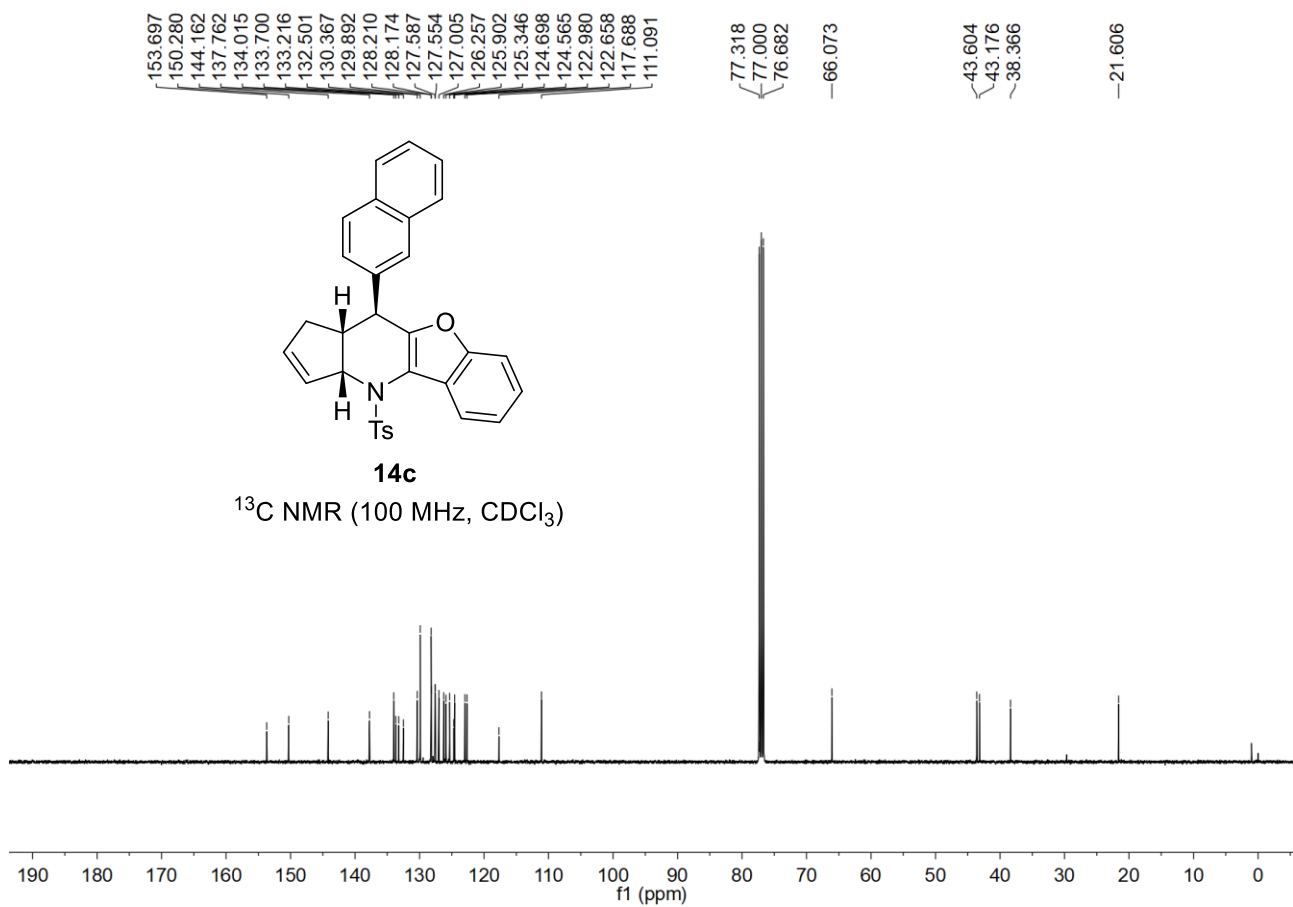

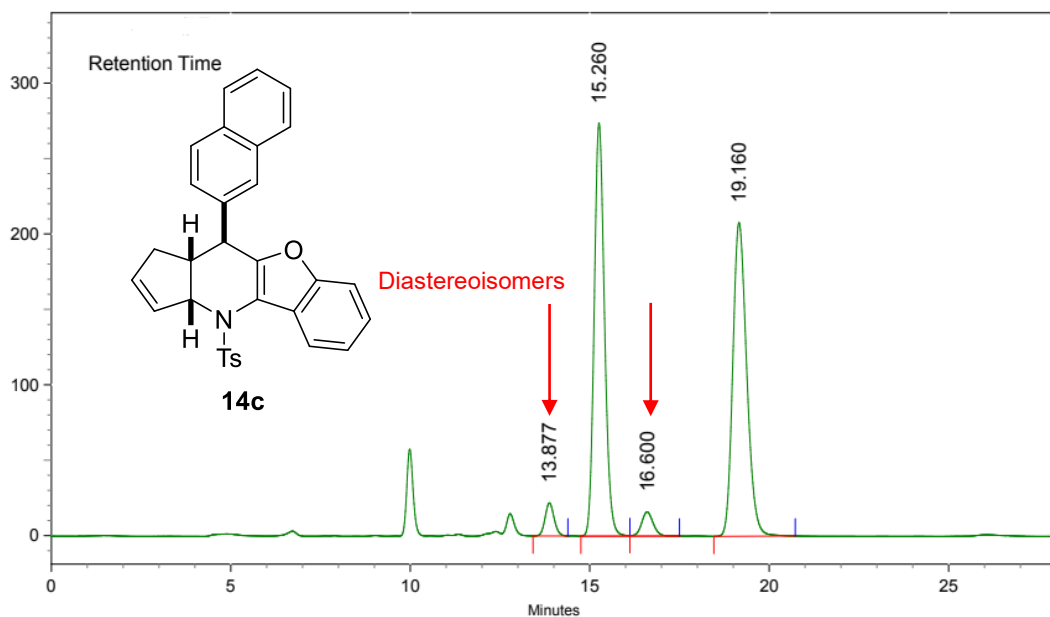

### AREA PERCENT REPORT

| Peak No. | Ret Time | Width | Height  | Area     | Area [%] |
|----------|----------|-------|---------|----------|----------|
| 1        | 13.877   | 0.973 | 367474  | 6454178  | 3.2612   |
| 2        | 15.260   | 1.367 | 4594775 | 91634990 | 46.3023  |
| 3        | 16.600   | 1.380 | 268922  | 6026153  | 3.0450   |
| 4        | 19.160   | 2.267 | 3488554 | 93790732 | 47.3915  |

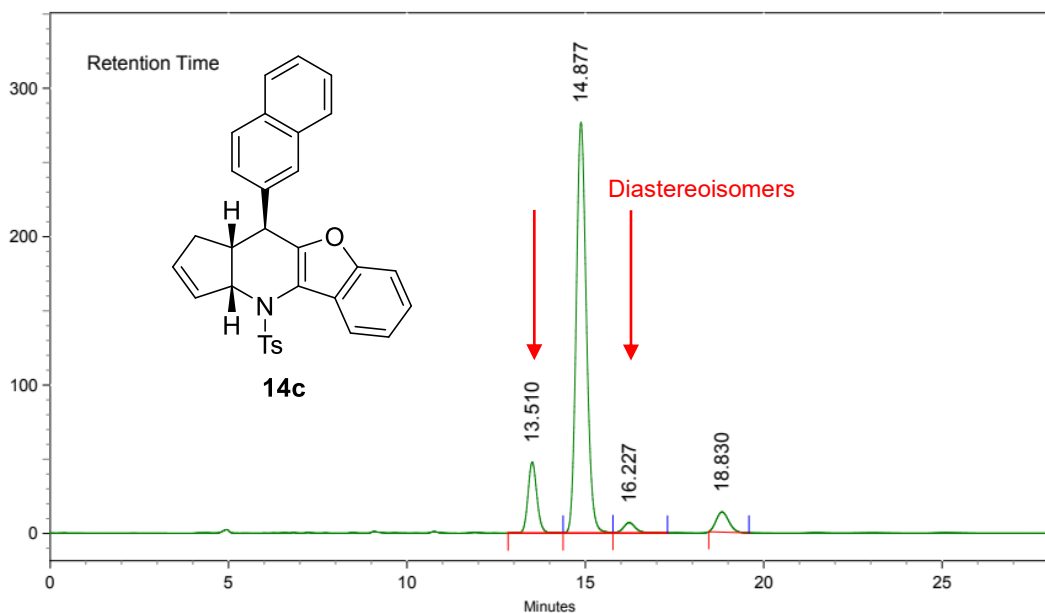

### AREA PERCENT REPORT

| Peak No. | Ret Time | Width | Height  | Area     | Area [%] |
|----------|----------|-------|---------|----------|----------|
| 1        | 13.510   | 1.543 | 804048  | 14009941 | 12.2753  |
| 2        | 14.877   | 1.397 | 4643137 | 91635596 | 80.2897  |
| 3        | 16.227   | 1.530 | 118213  | 2872015  | 2.5164   |
| 4        | 18.830   | 1.127 | 227692  | 5613675  | 4.9186   |

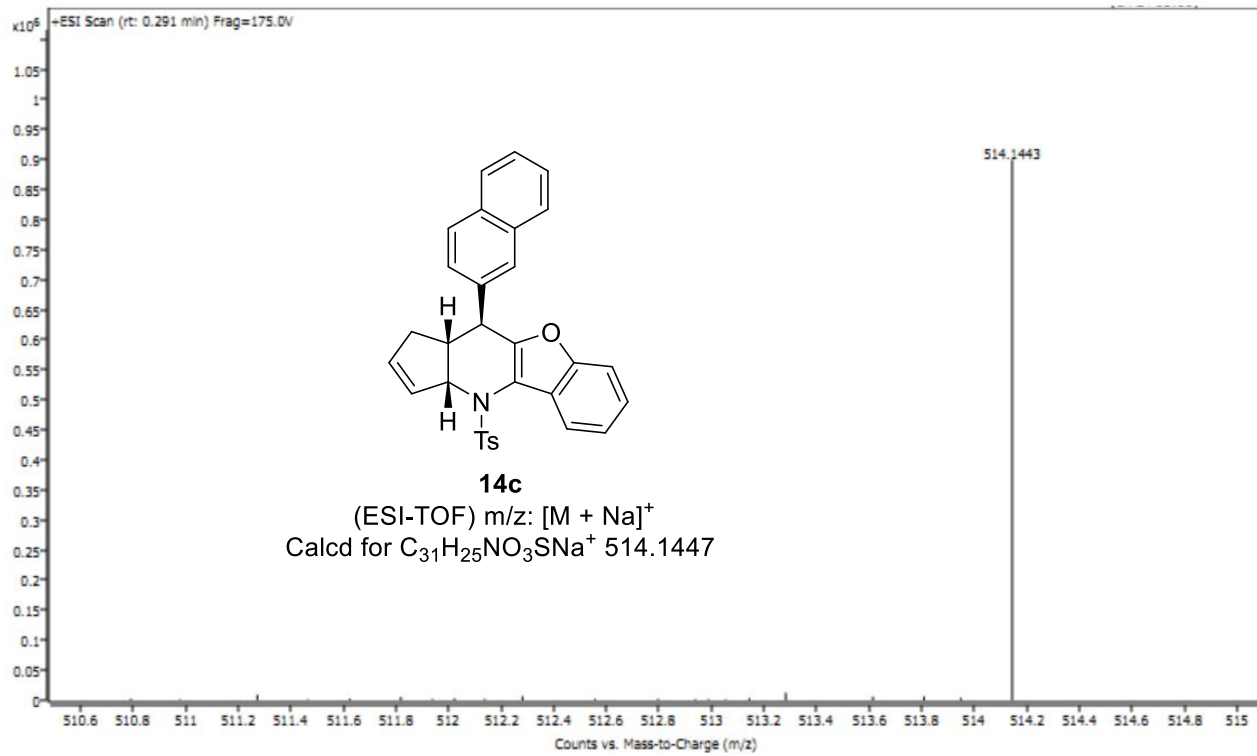

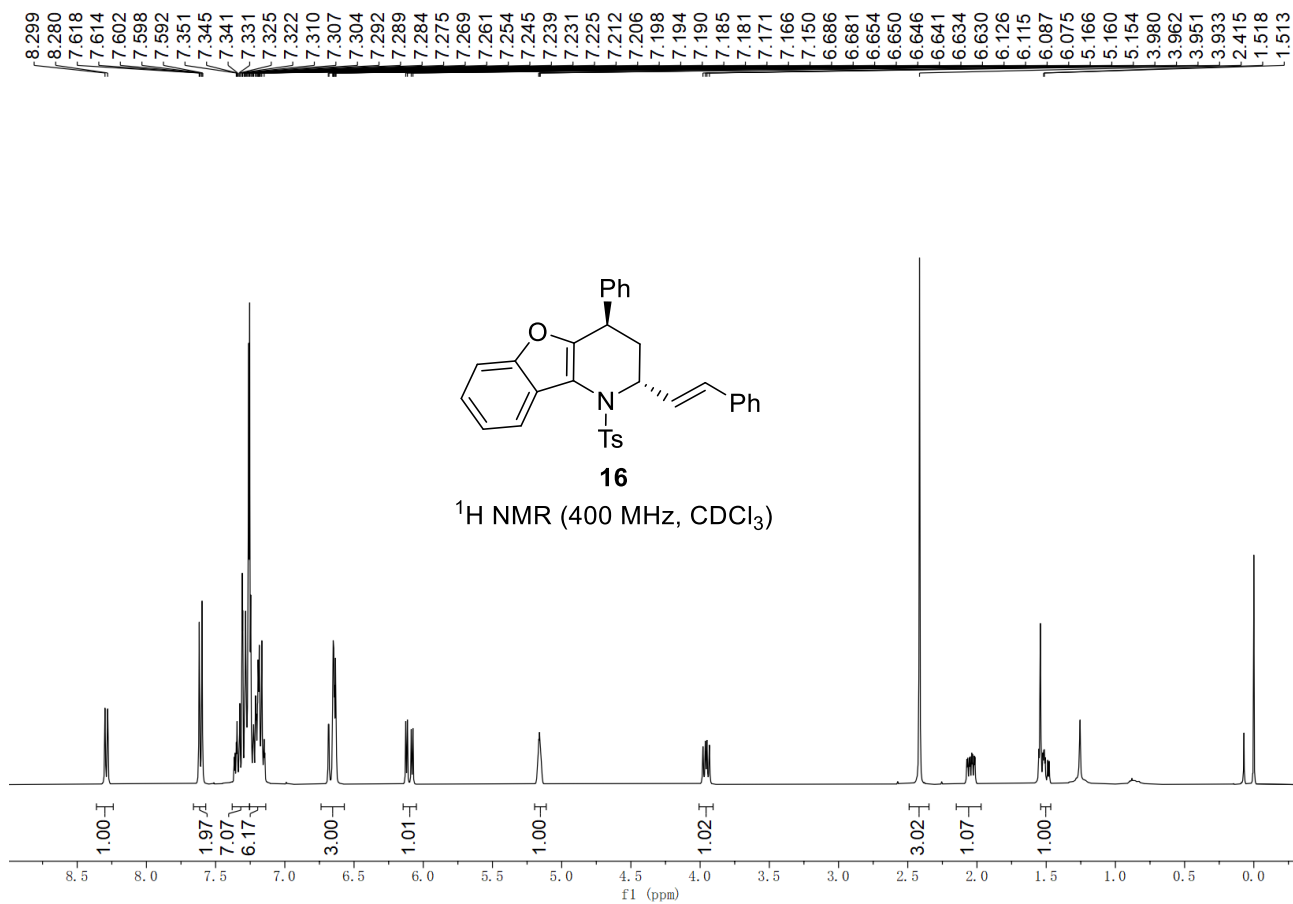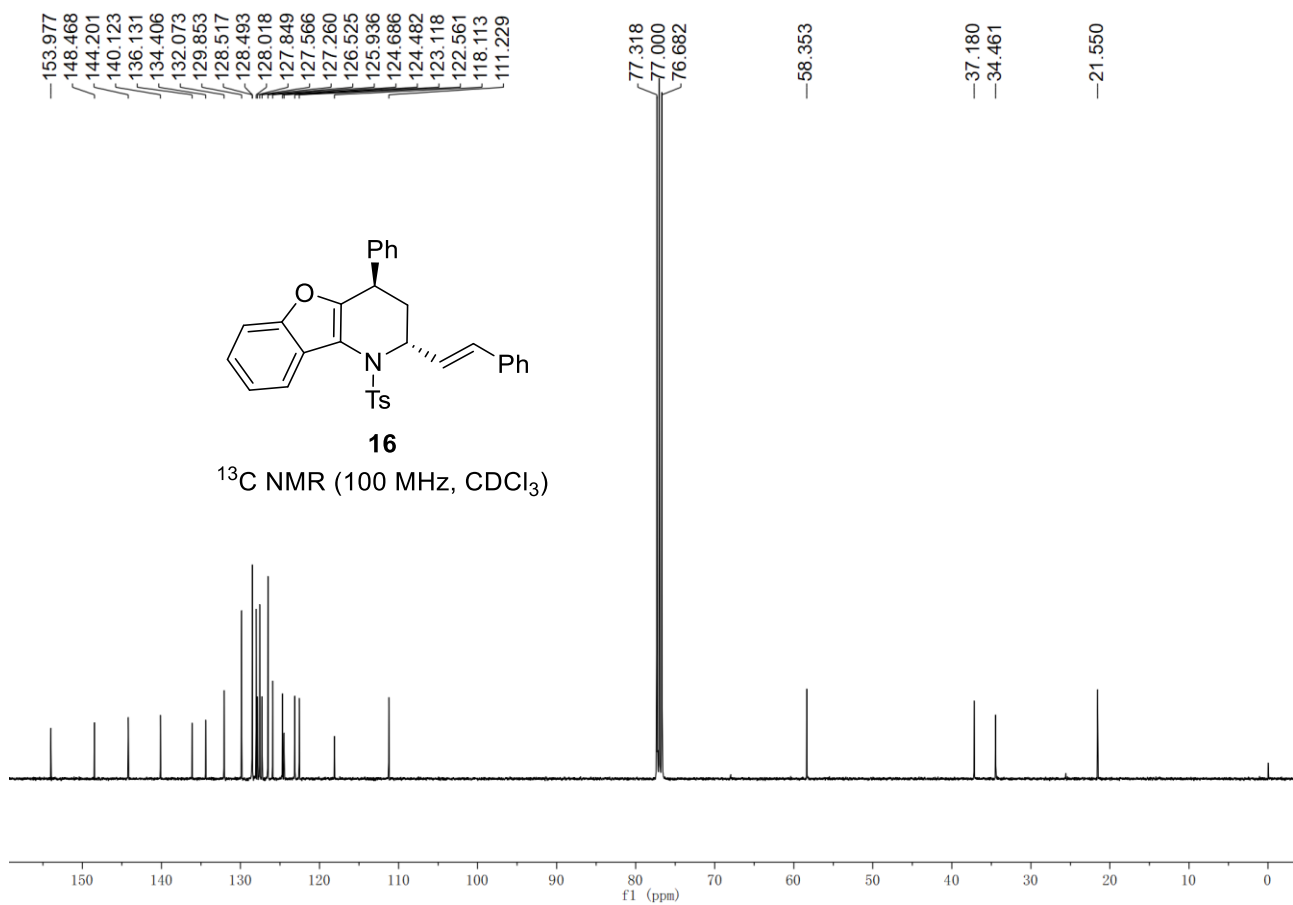

8.336  
8.332  
8.318  
8.314  
7.584  
7.579  
7.567  
7.563  
7.415  
7.412  
7.396  
7.392  
7.378  
7.373  
7.359  
7.355  
7.352  
7.347  
7.343  
7.328  
7.314  
7.274  
7.143  
7.130  
7.125  
7.118  
7.112  
6.903  
6.898  
6.884  
6.879  
6.823  
6.818  
6.810  
6.806  
6.799  
6.618  
6.612  
6.578  
6.573  
5.534  
5.524  
5.495  
5.485  
5.051  
5.046  
5.041  
3.995  
3.976  
2.436  
2.039  
2.036  
2.006  
2.003  
2.000  
1.996  
1.877  
1.865  
0.000

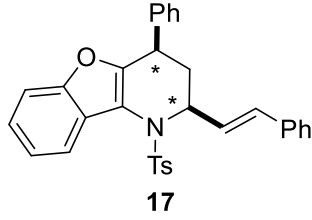

<sup>1</sup>H NMR (400 MHz, CDCl<sub>3</sub>)

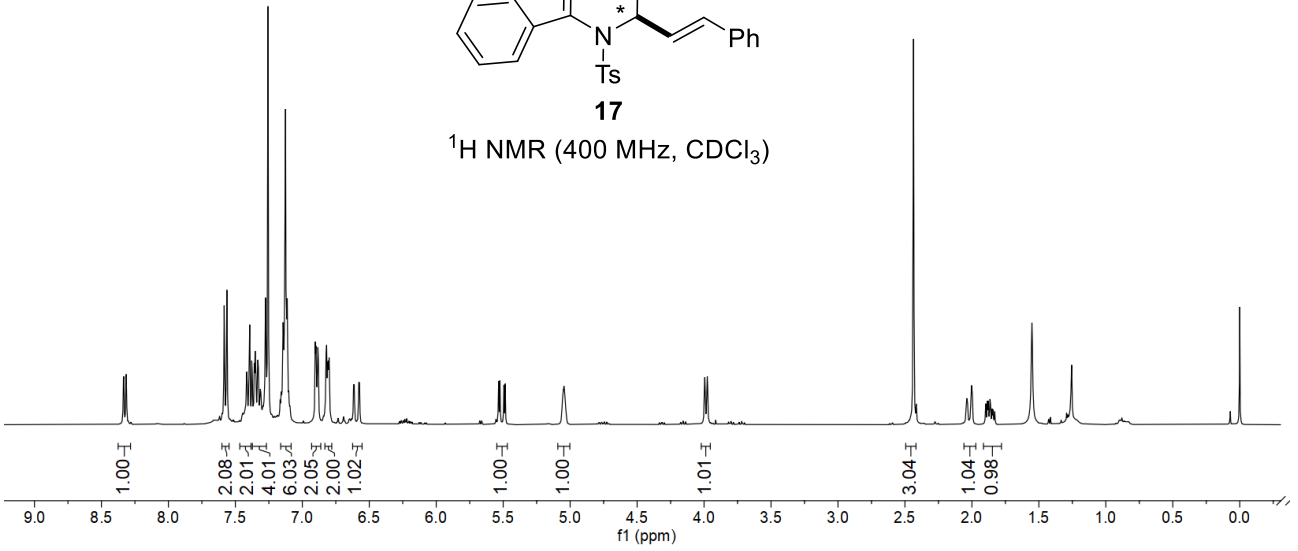

153.772  
147.097  
144.169  
141.428  
136.315  
134.791  
130.079  
129.840  
128.579  
128.411  
128.394  
128.166  
127.655  
127.605  
127.323  
126.533  
126.481  
124.701  
124.455  
123.137  
122.768  
118.755  
111.244  
77.317  
77.000  
76.682  
56.703  
36.114  
33.241  
21.662

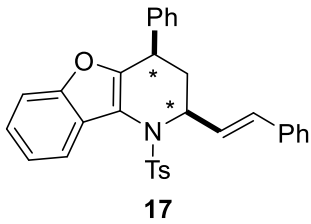

<sup>13</sup>C NMR (100 MHz, CDCl<sub>3</sub>)

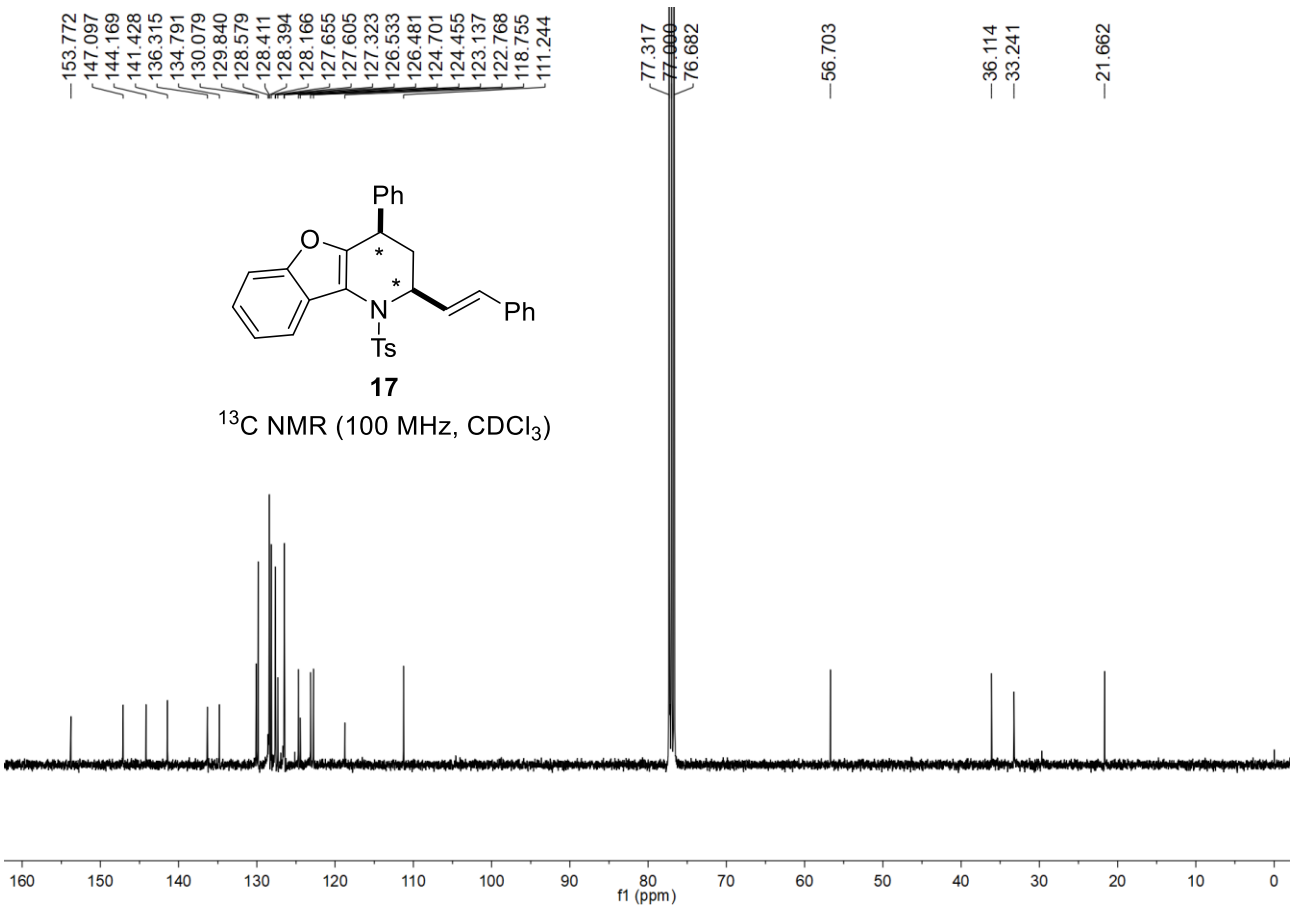



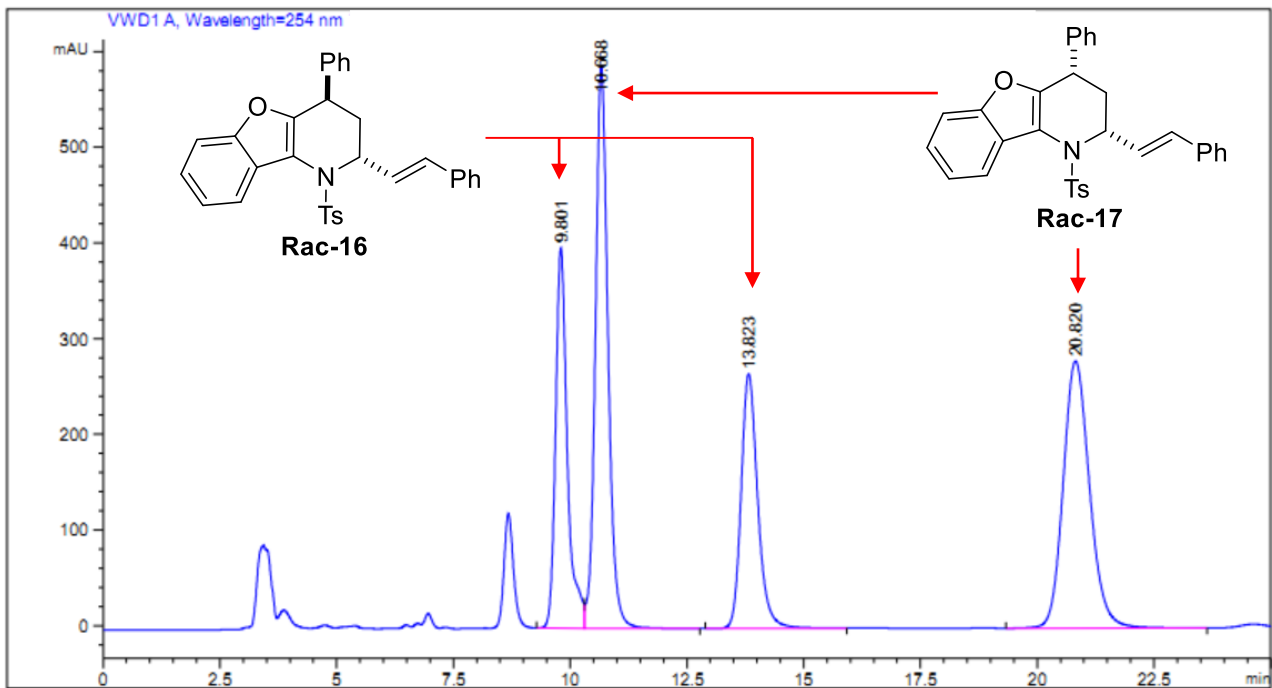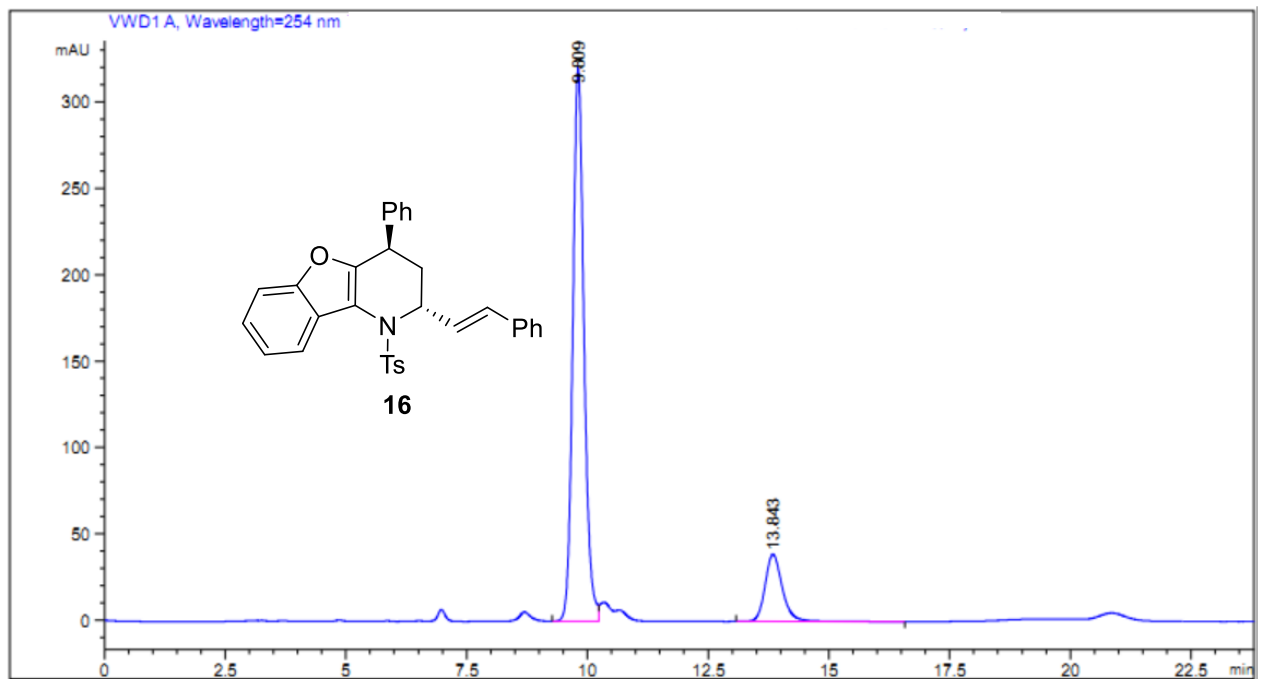

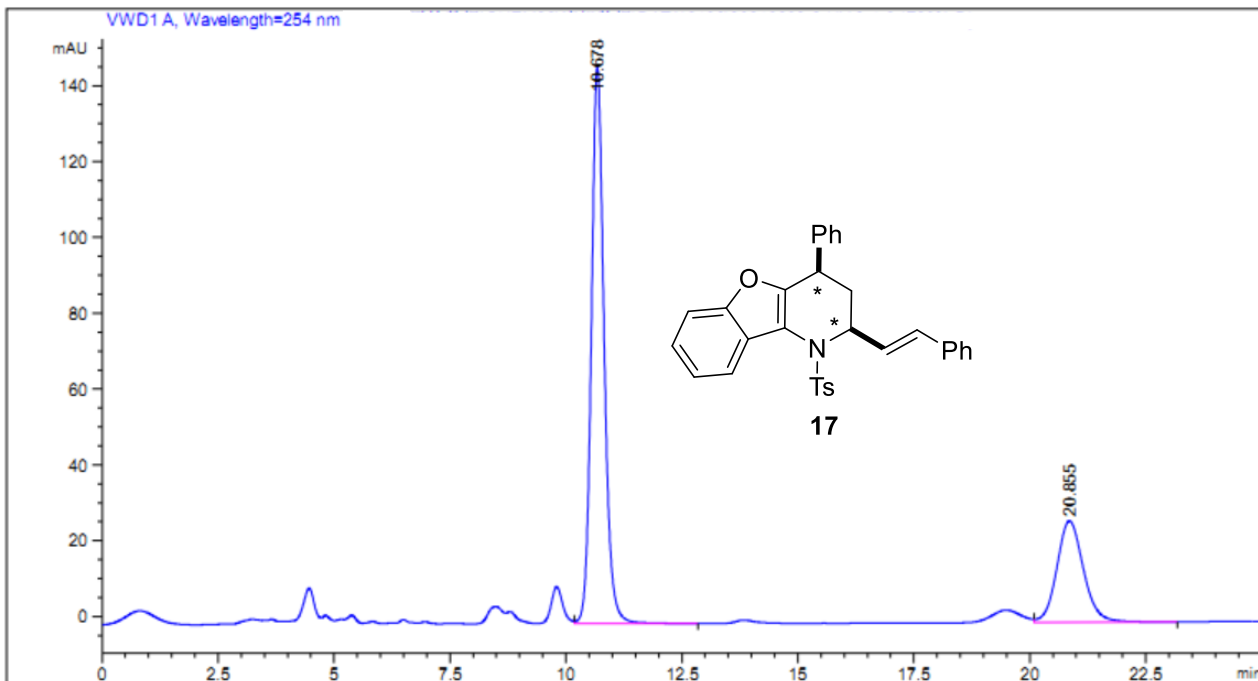

| # | [min]     | [min]  | [mAU*s]    | [mAU]     | %       |
|---|-----------|--------|------------|-----------|---------|
| 1 | 10.678 VB | 0.2930 | 2803.35352 | 146.62024 | 72.3232 |
| 2 | 20.855 VB | 0.6188 | 1072.79553 | 26.77868  | 27.6768 |

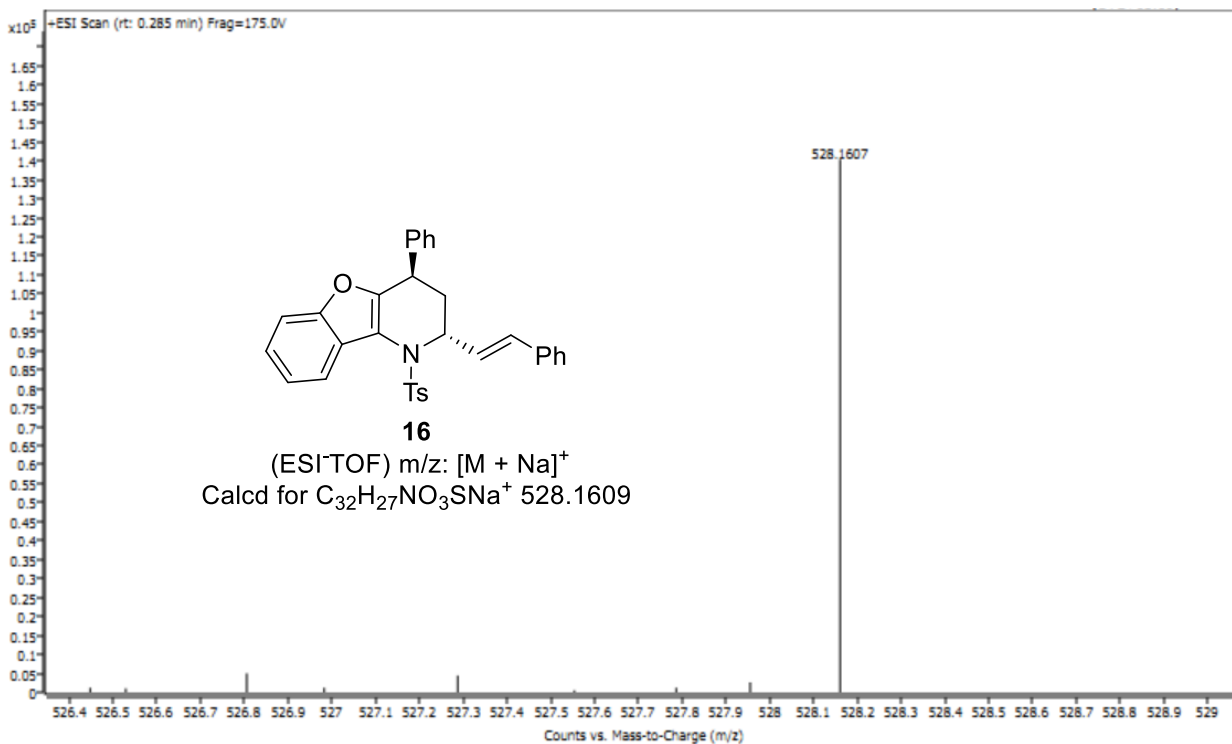

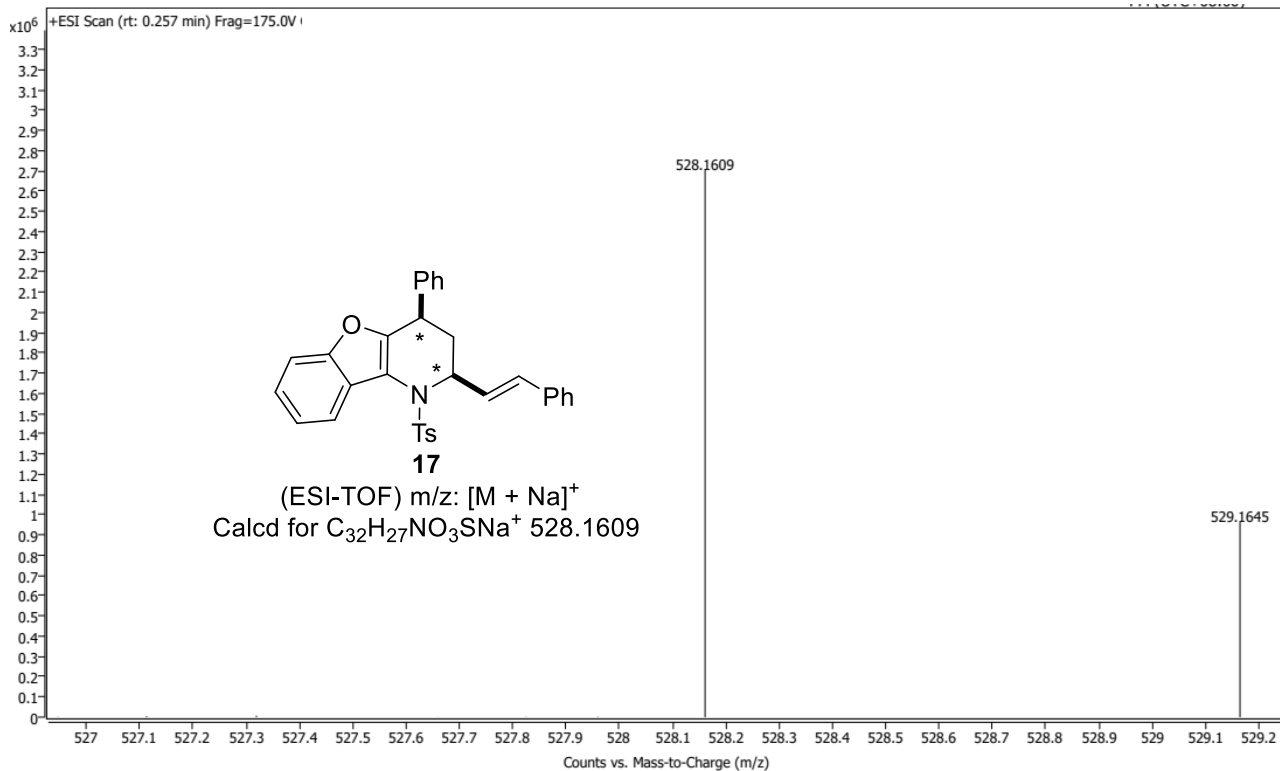

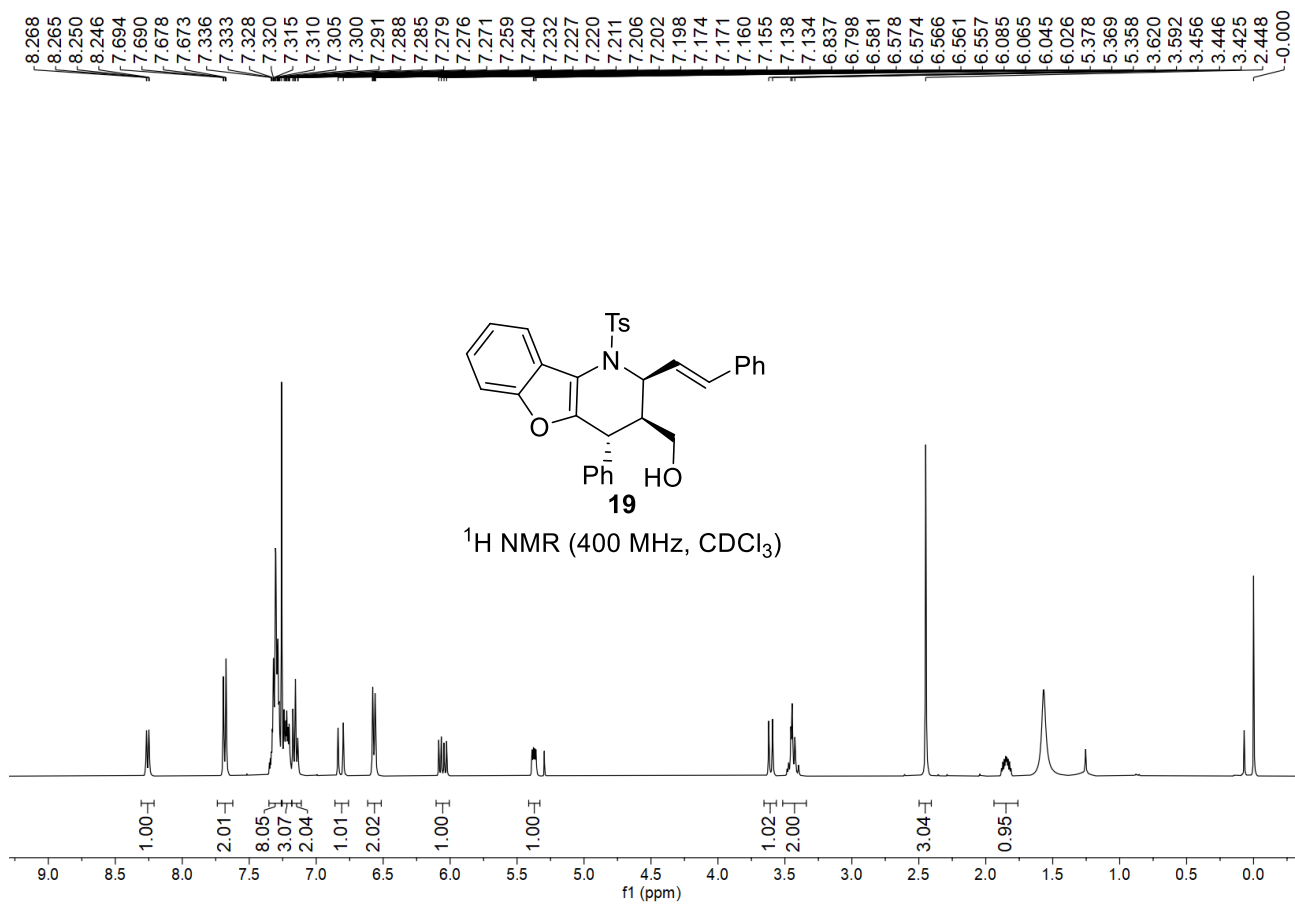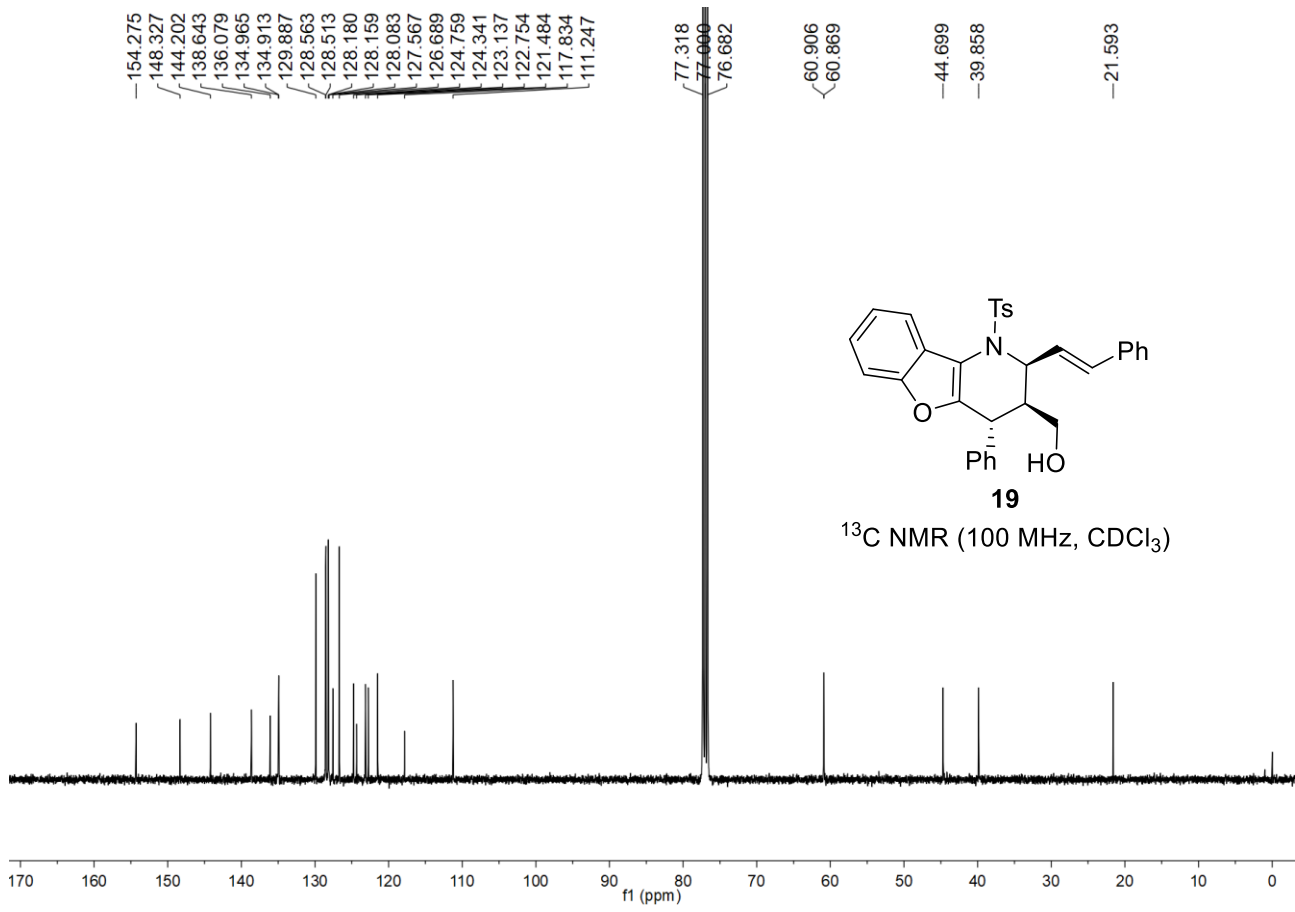

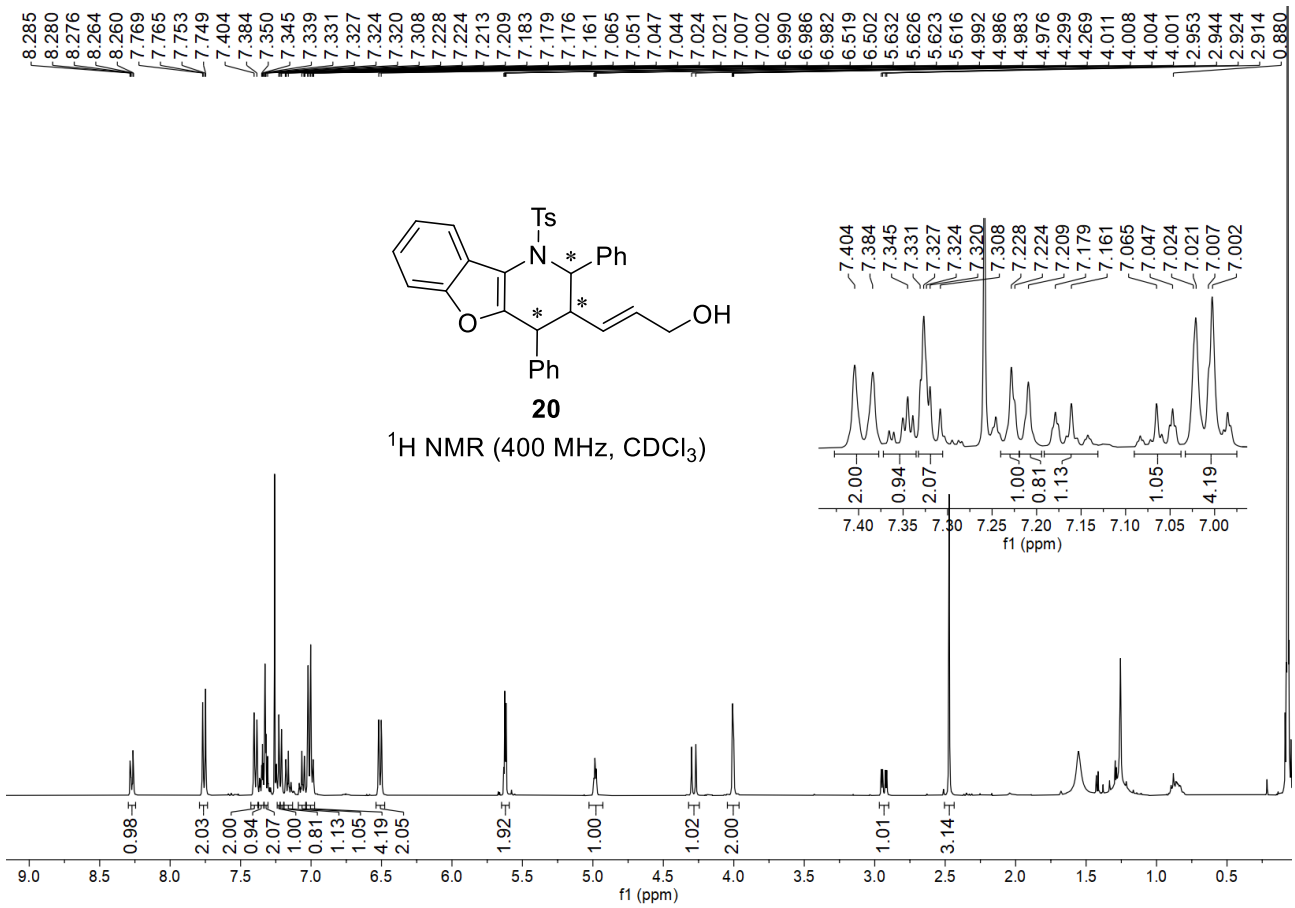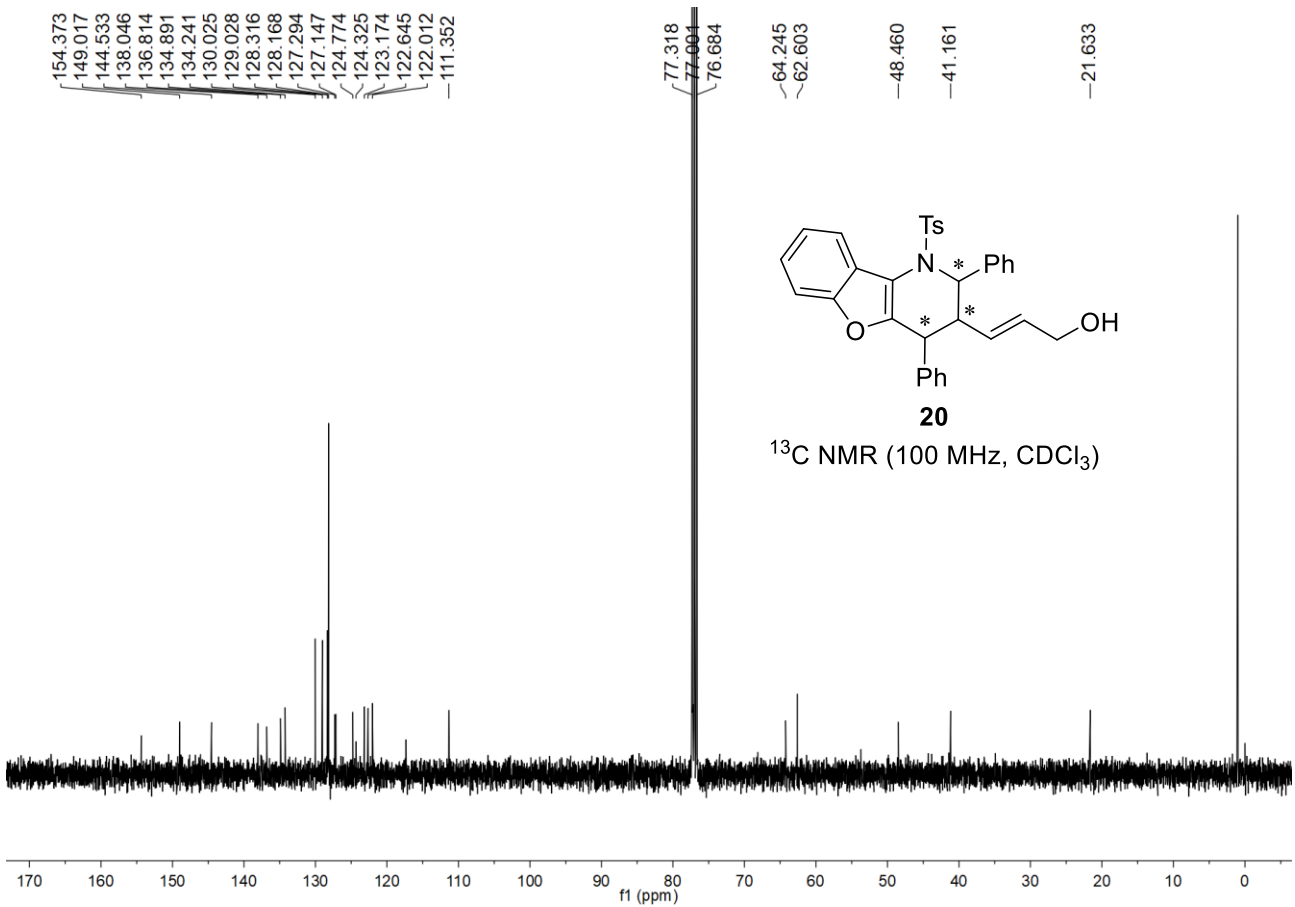

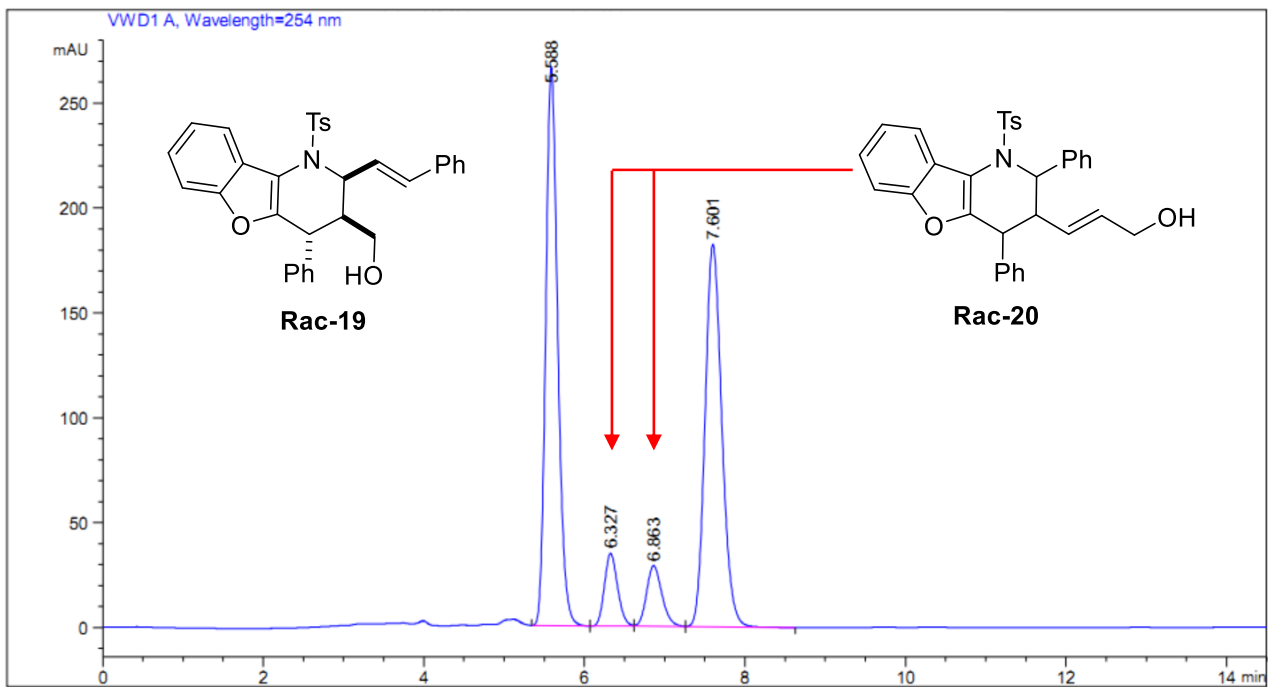

| # | [min] |    | [min]  | [mAU*s]    | [mAU]     | %       |
|---|-------|----|--------|------------|-----------|---------|
| 1 | 5.588 | BB | 0.1605 | 2764.00415 | 266.02731 | 44.6367 |
| 2 | 6.327 | BV | 0.1775 | 398.03018  | 34.69069  | 6.4279  |
| 3 | 6.863 | VB | 0.2047 | 384.44531  | 28.90234  | 6.2085  |
| 4 | 7.601 | BB | 0.2246 | 2645.74878 | 182.30461 | 42.7269 |

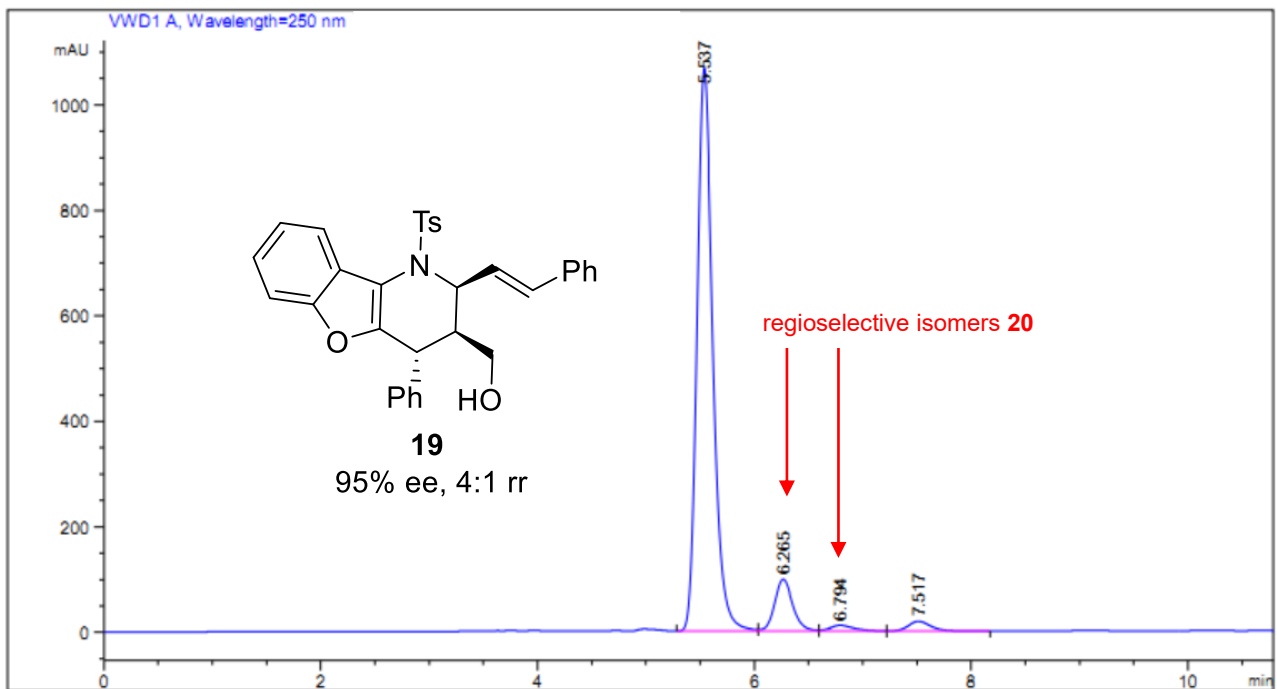

| # | [min] |    | [min]  | [mAU*s]    | [mAU]      | %       |
|---|-------|----|--------|------------|------------|---------|
| 1 | 5.537 | BV | 0.1570 | 1.08929e4  | 1067.08411 | 87.3761 |
| 2 | 6.265 | VV | 0.1777 | 1143.10168 | 98.41490   | 9.1693  |
| 3 | 6.794 | VB | 0.2235 | 165.83662  | 11.02894   | 1.3302  |
| 4 | 7.517 | BB | 0.2234 | 264.83557  | 18.38567   | 2.1244  |

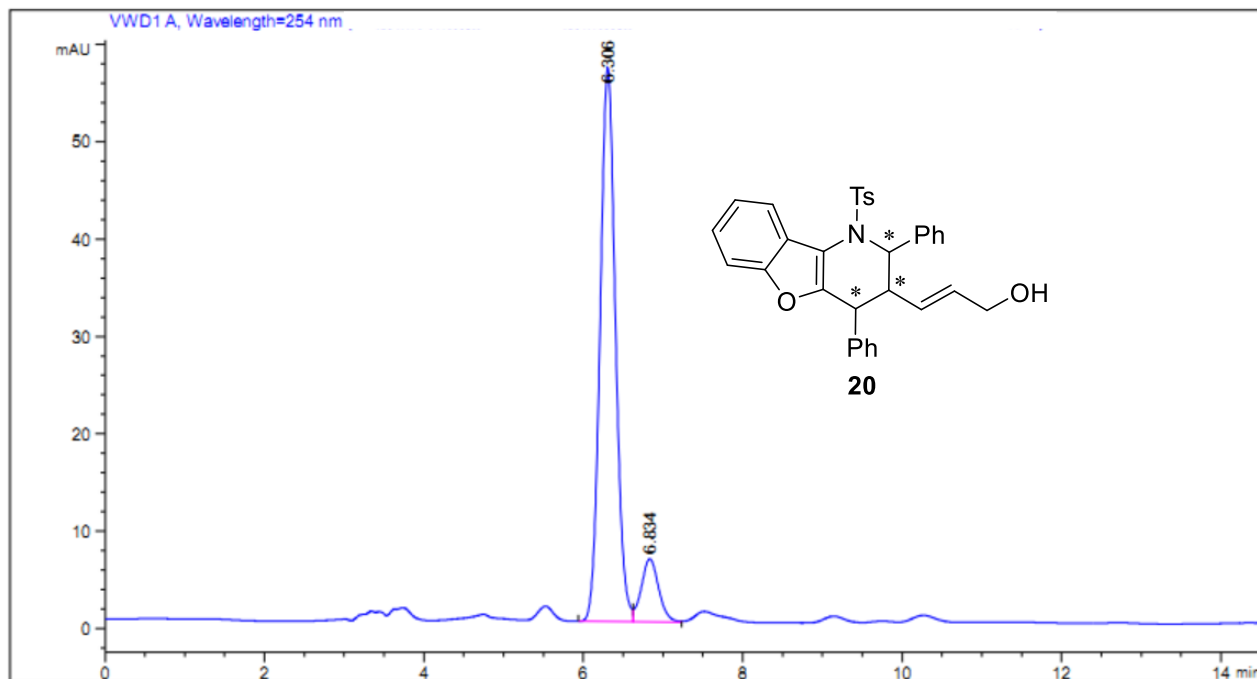

| # | [min] |    | [min]  | [mAU*s]   | [mAU]    | %       |
|---|-------|----|--------|-----------|----------|---------|
| 1 | 6.306 | BV | 0.2059 | 762.58545 | 56.88541 | 88.6225 |
| 2 | 6.834 | VV | 0.2318 | 97.90224  | 6.47265  | 11.3775 |

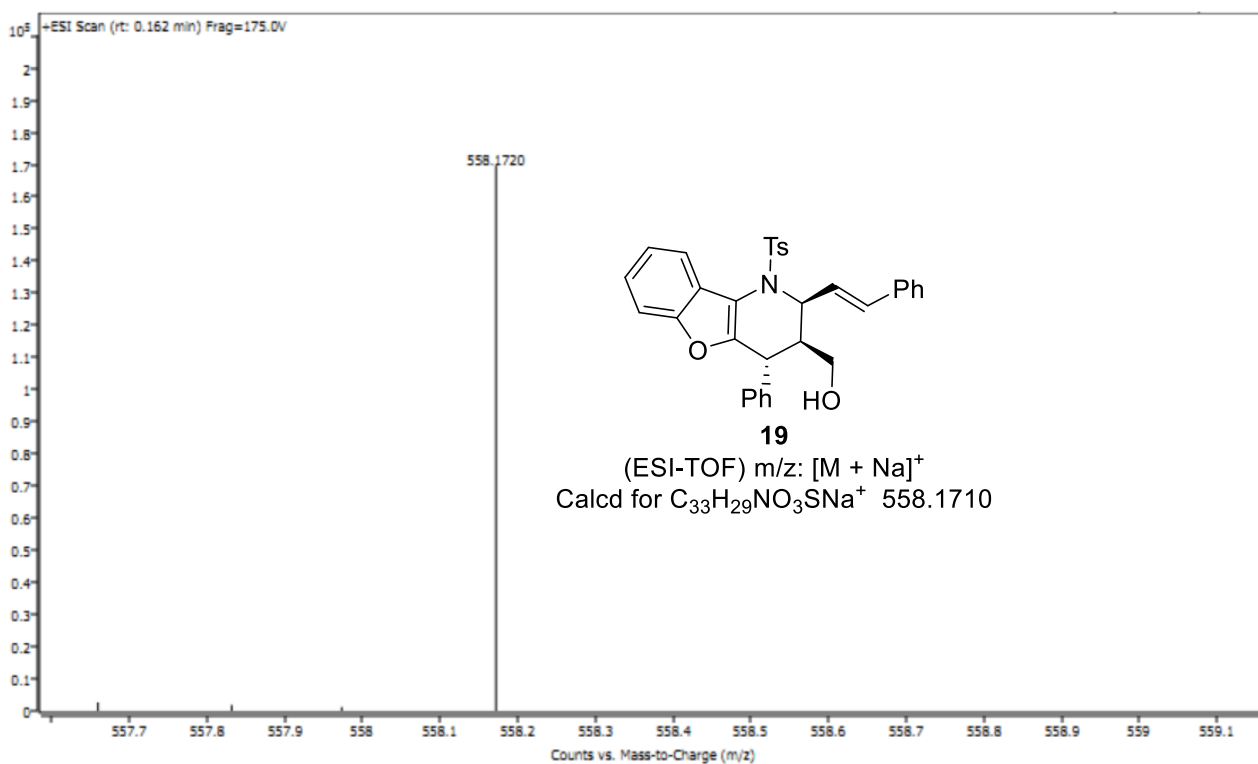

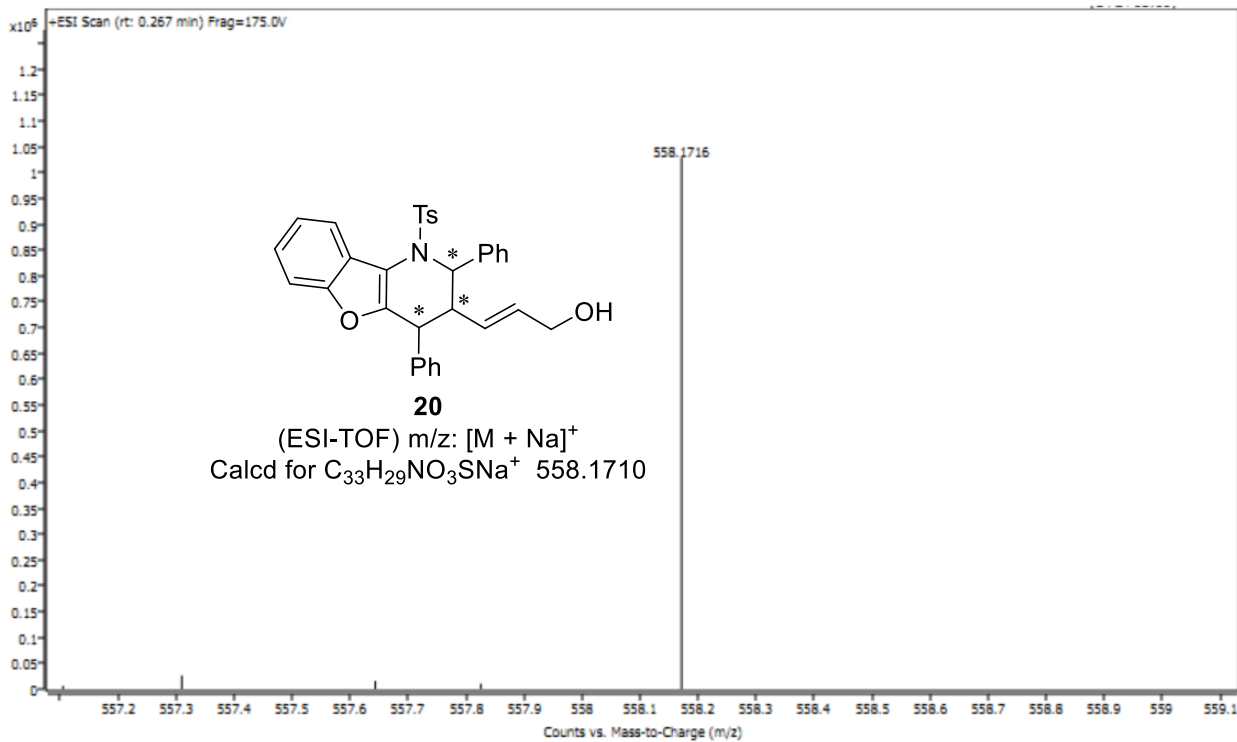



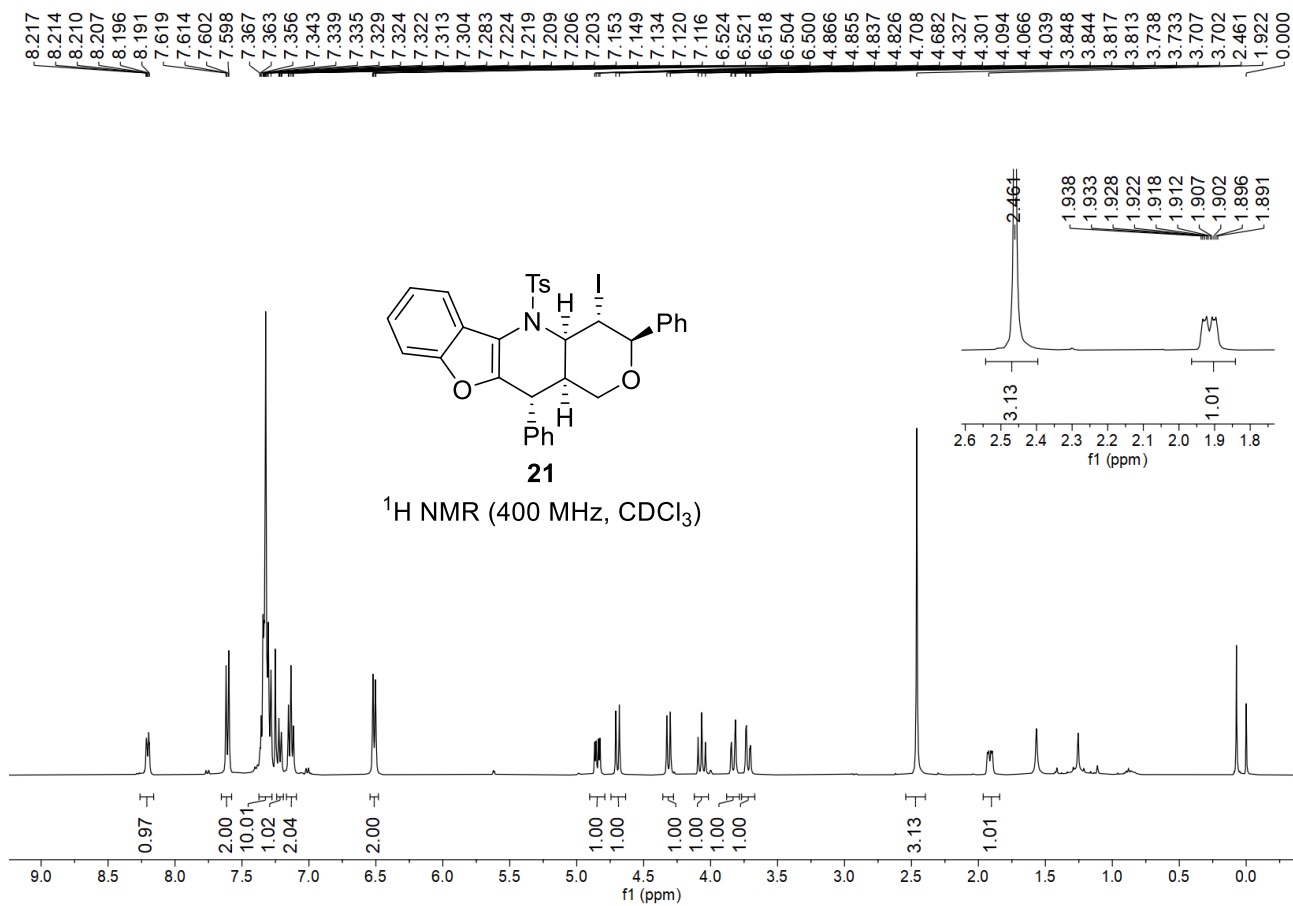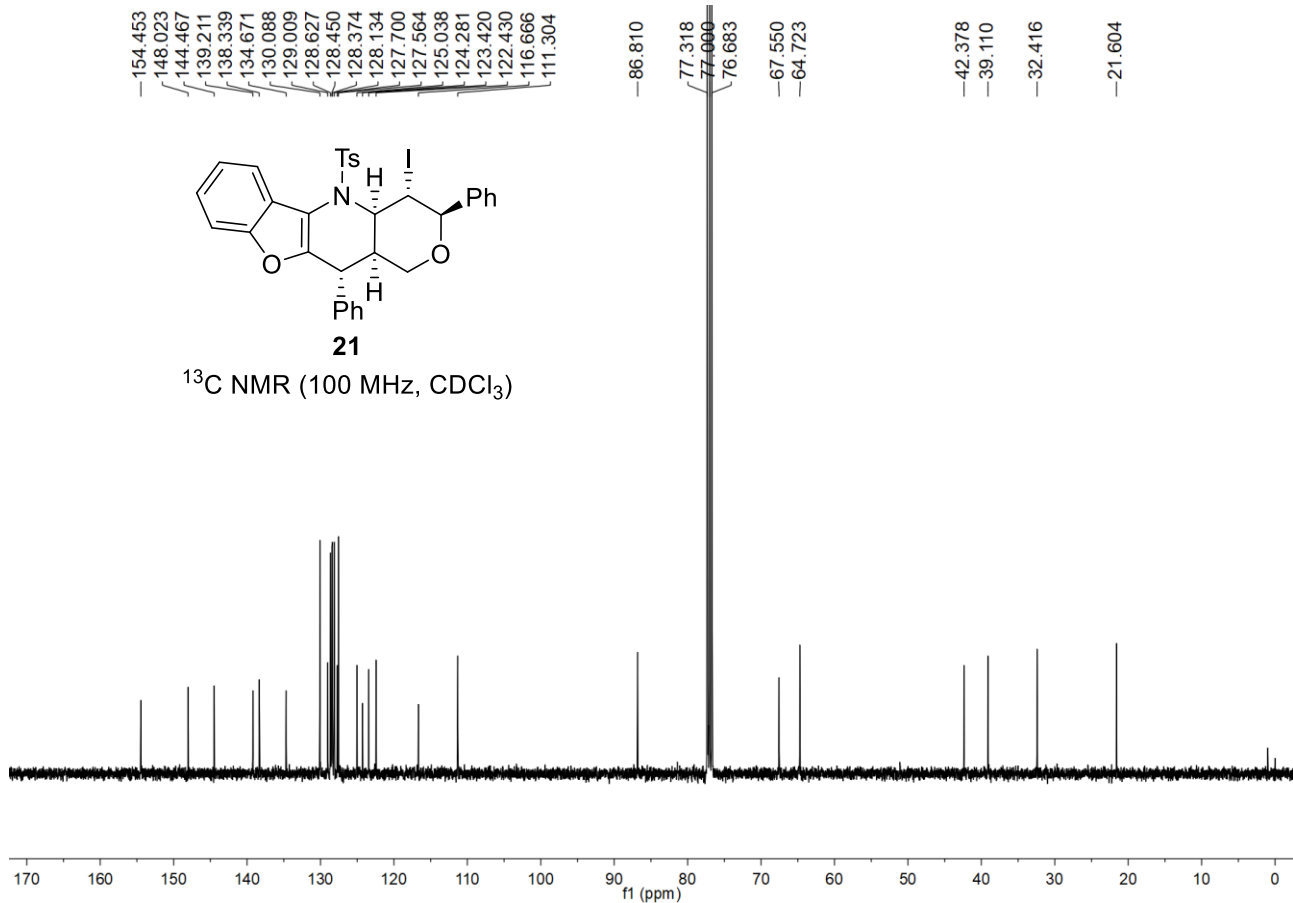

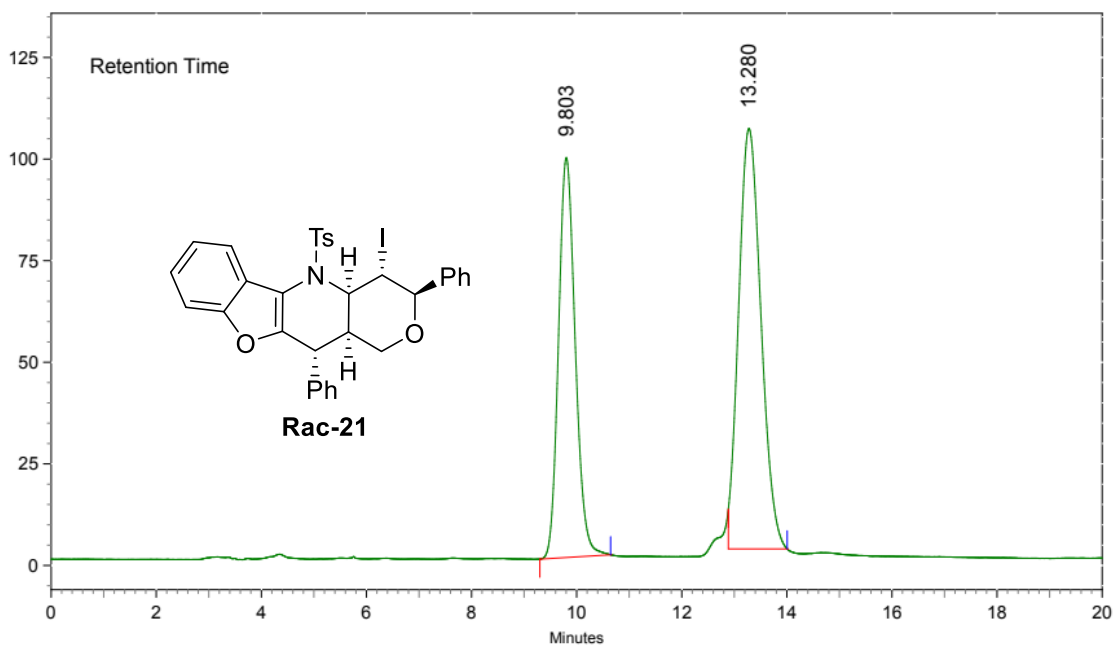

### AREA PERCENT REPORT

| Peak No. | Ret Time | Width | Height  | Area     | Area [%] |
|----------|----------|-------|---------|----------|----------|
| 1        | 9.803    | 1.347 | 1650892 | 36488077 | 41.5486  |
| 2        | 13.280   | 1.120 | 1735418 | 51332240 | 58.4514  |

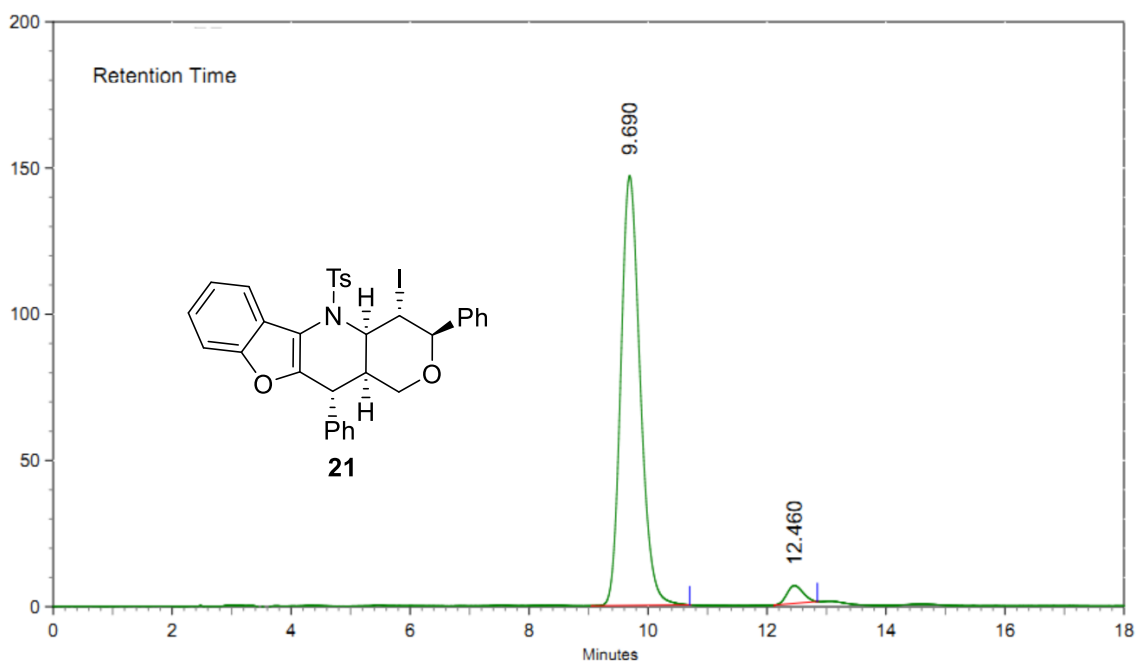

### AREA PERCENT REPORT

| Peak No. | Ret Time | Width | Height  | Area     | Area [%] |
|----------|----------|-------|---------|----------|----------|
| 1        | 9.690    | 1.647 | 2464746 | 55543182 | 96.6446  |
| 2        | 12.460   | 0.727 | 102311  | 1928396  | 3.3554   |

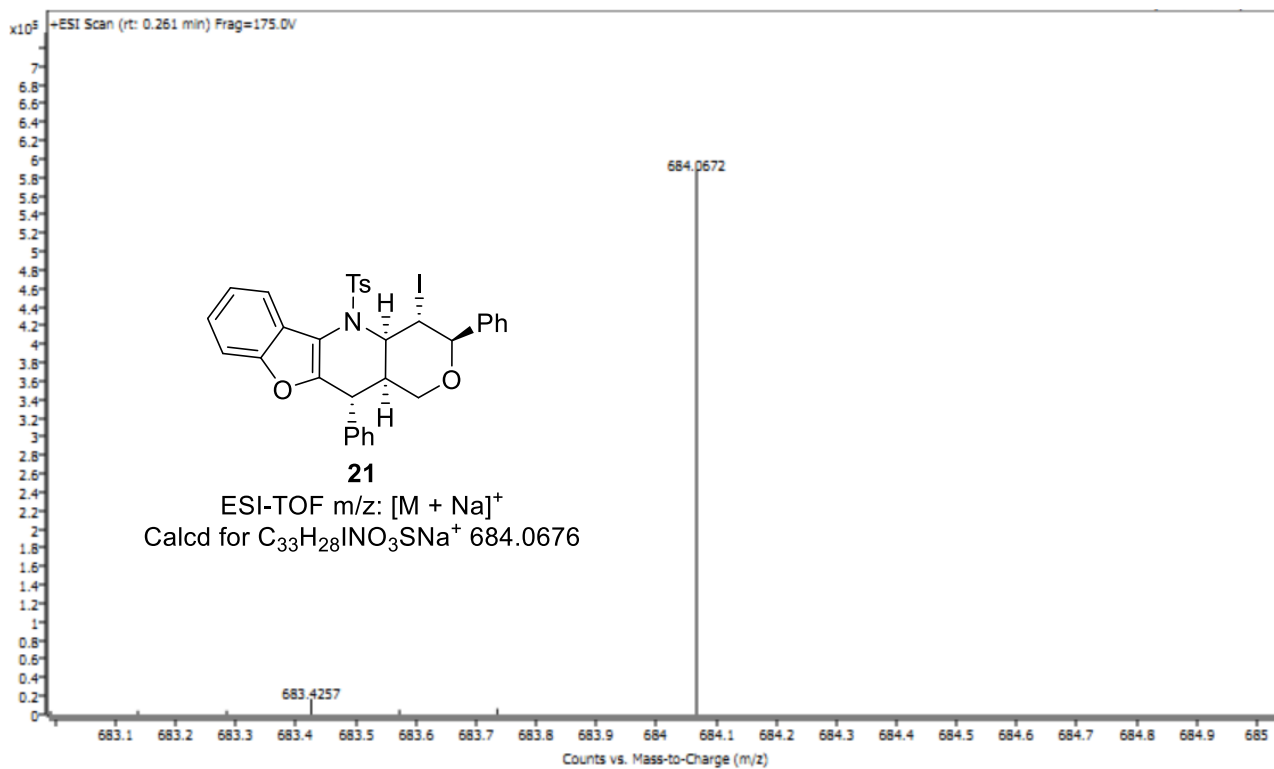

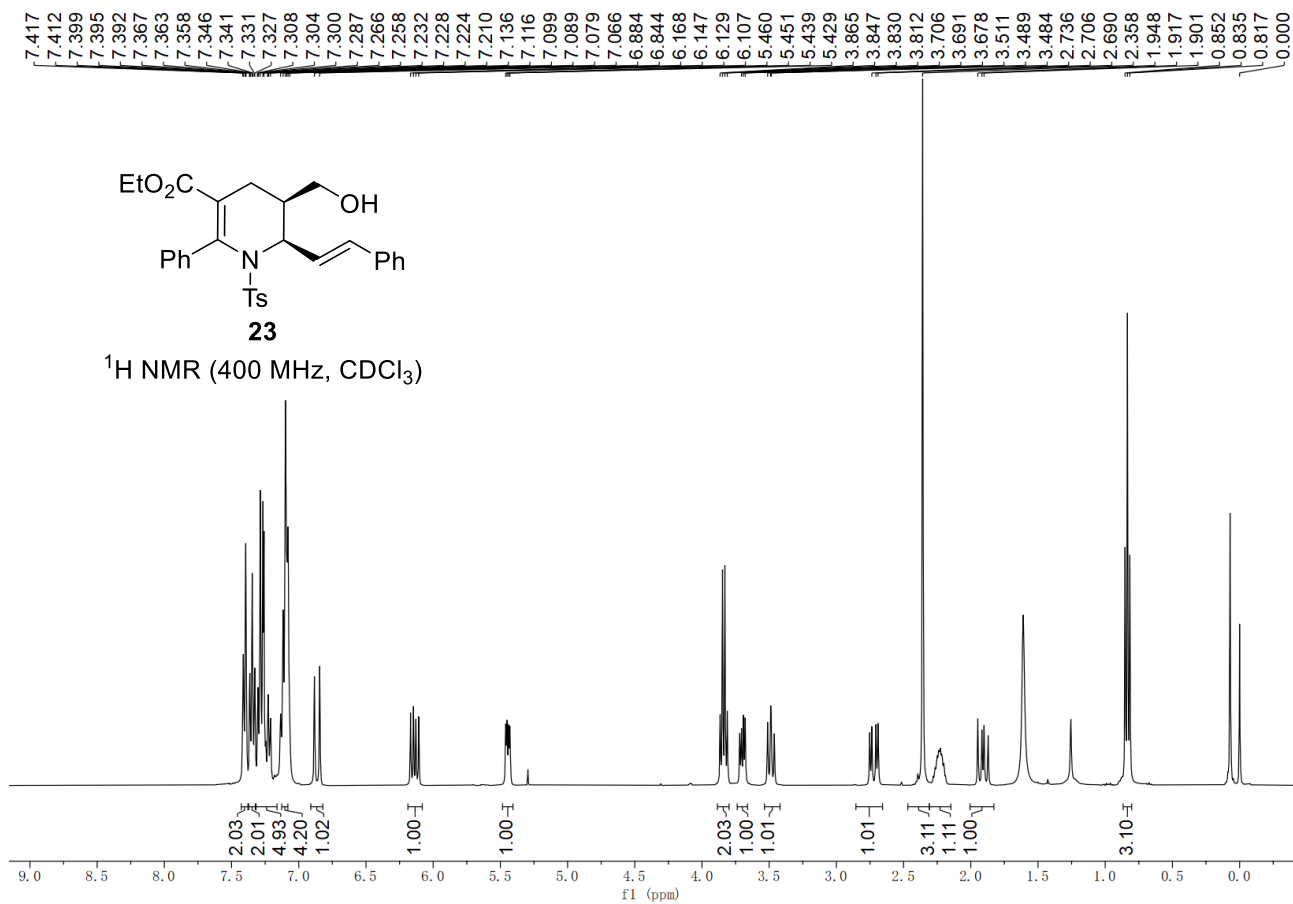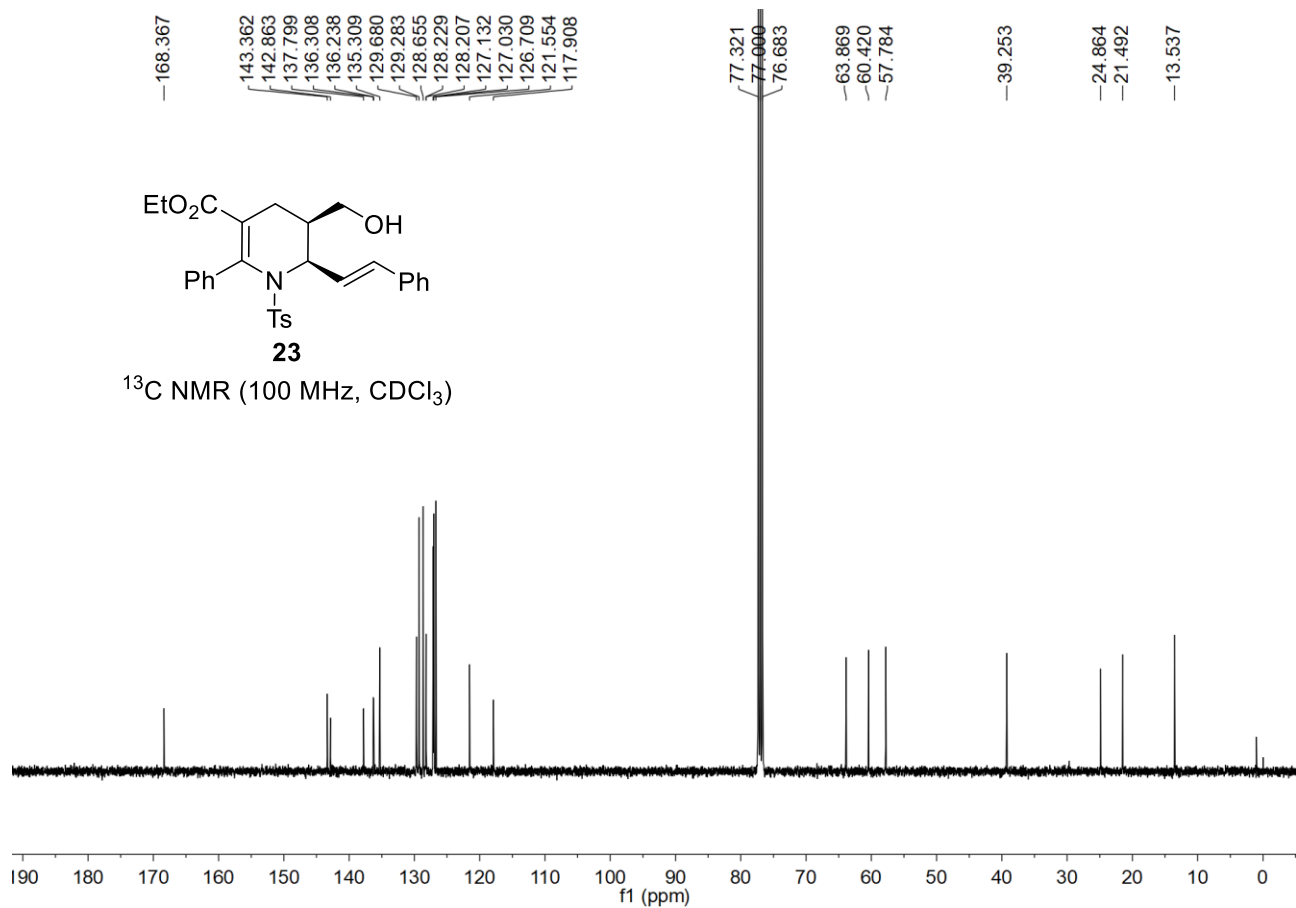

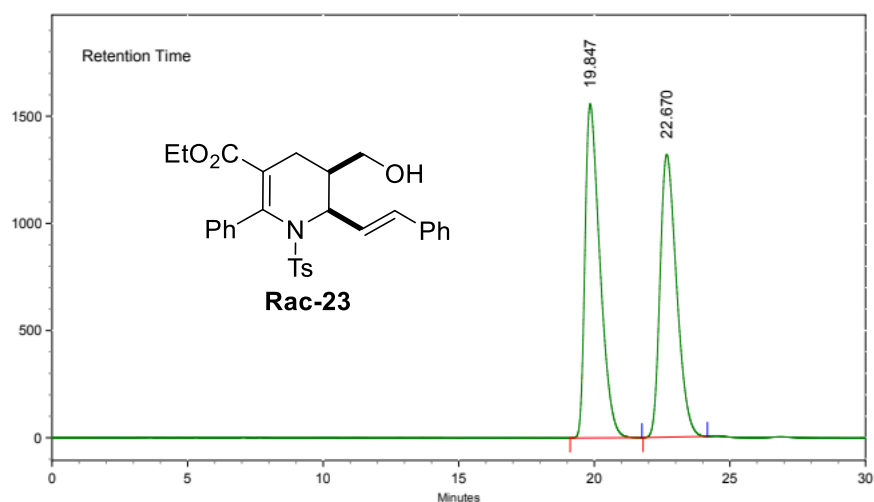

AREA PERCENT REPORT

| Peak No. | Ret Time | Width | Height   | Area      | Area [%] |
|----------|----------|-------|----------|-----------|----------|
| 1        | 19.847   | 2.647 | 26140923 | 997199617 | 51.5302  |
| 2        | 22.670   | 2.373 | 22125655 | 937976107 | 48.4698  |

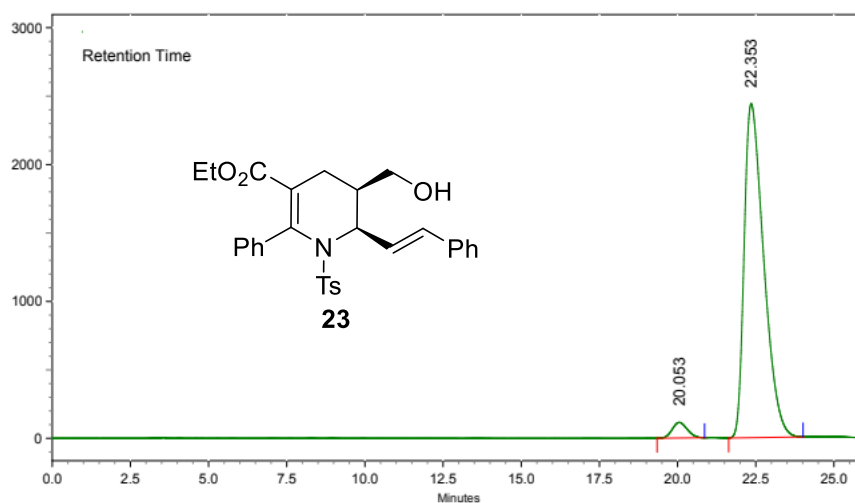

AREA PERCENT REPORT

| Peak No. | Ret Time | Width | Height   | Area       | Area [%] |
|----------|----------|-------|----------|------------|----------|
| 1        | 20.053   | 1.520 | 1904713  | 63455617   | 3.4477   |
| 2        | 22.353   | 2.380 | 40920672 | 1777076269 | 96.5523  |

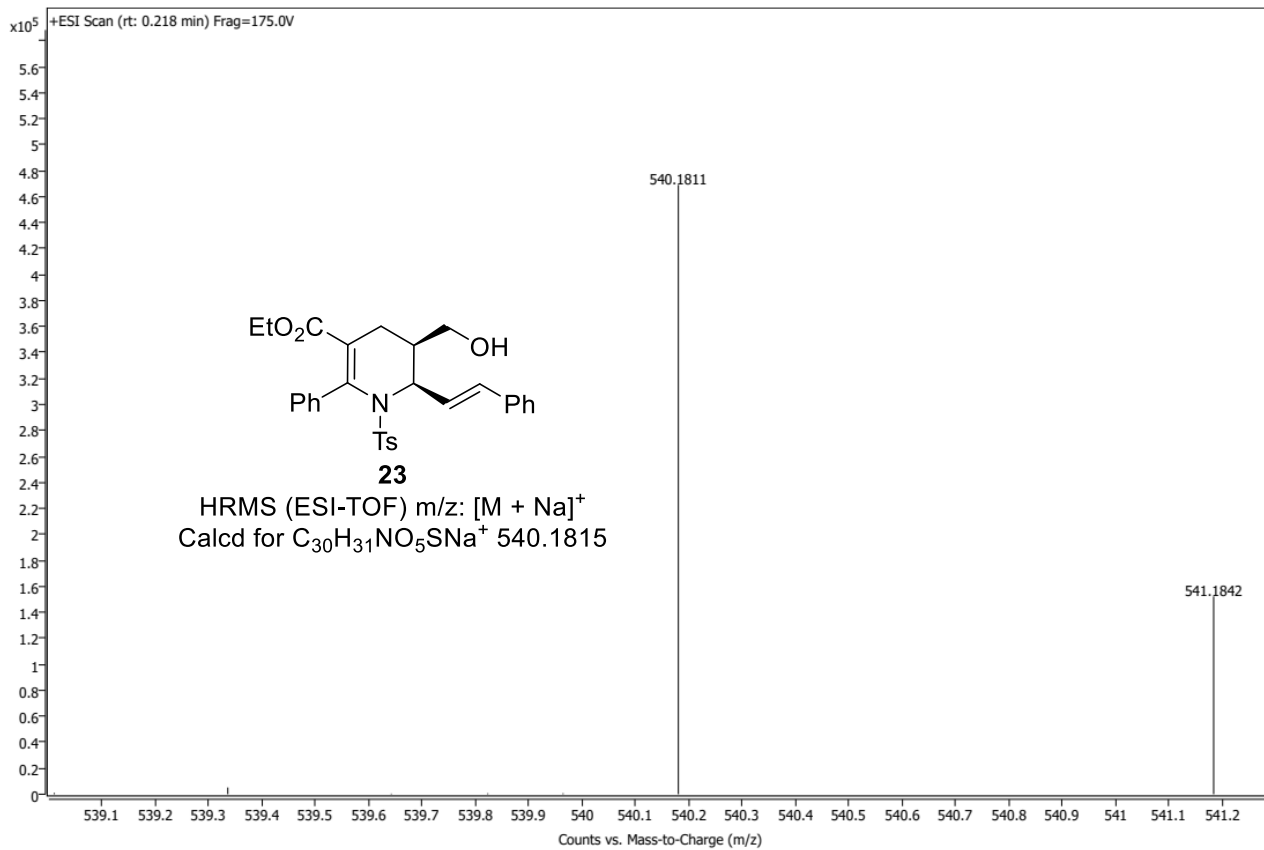

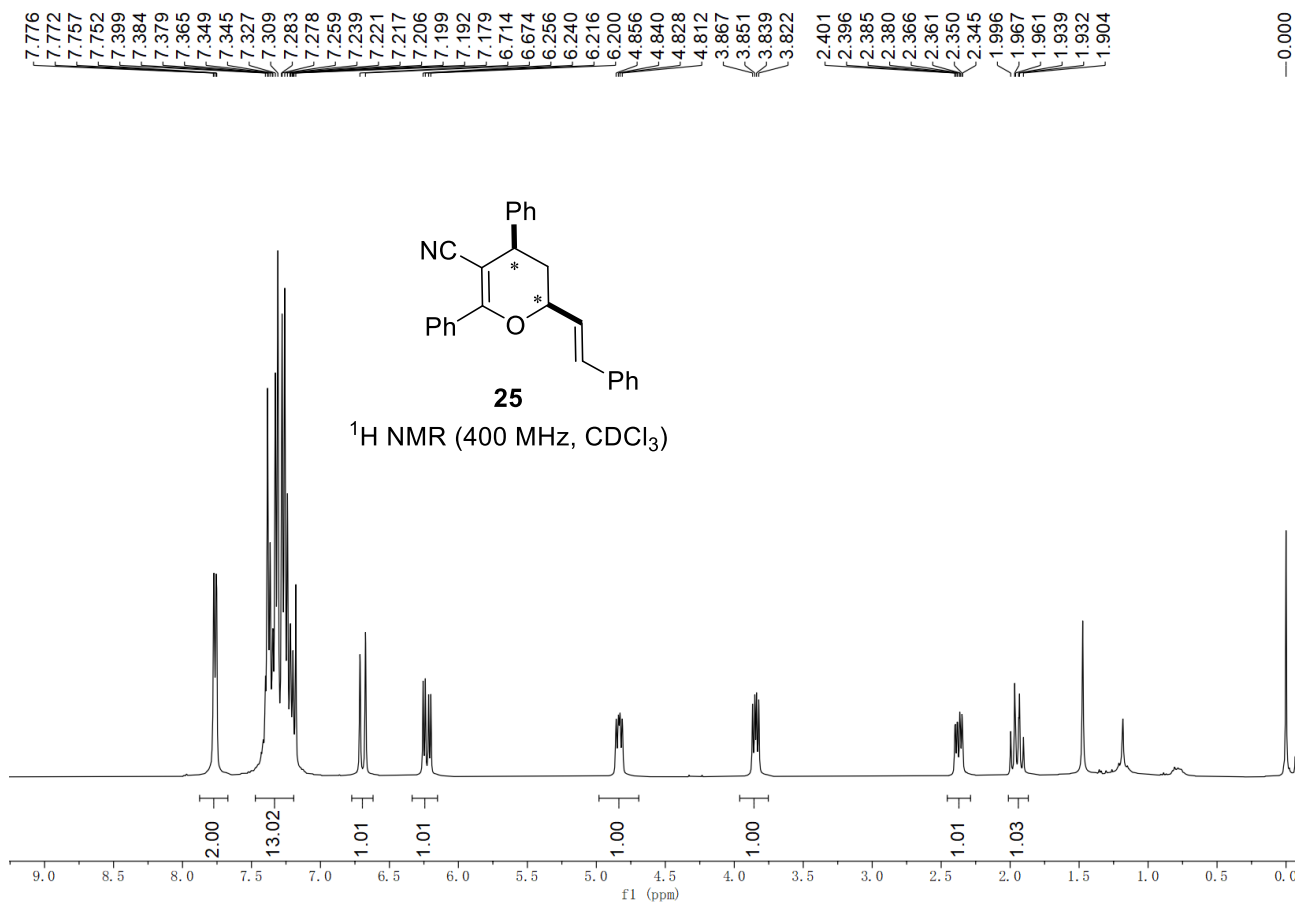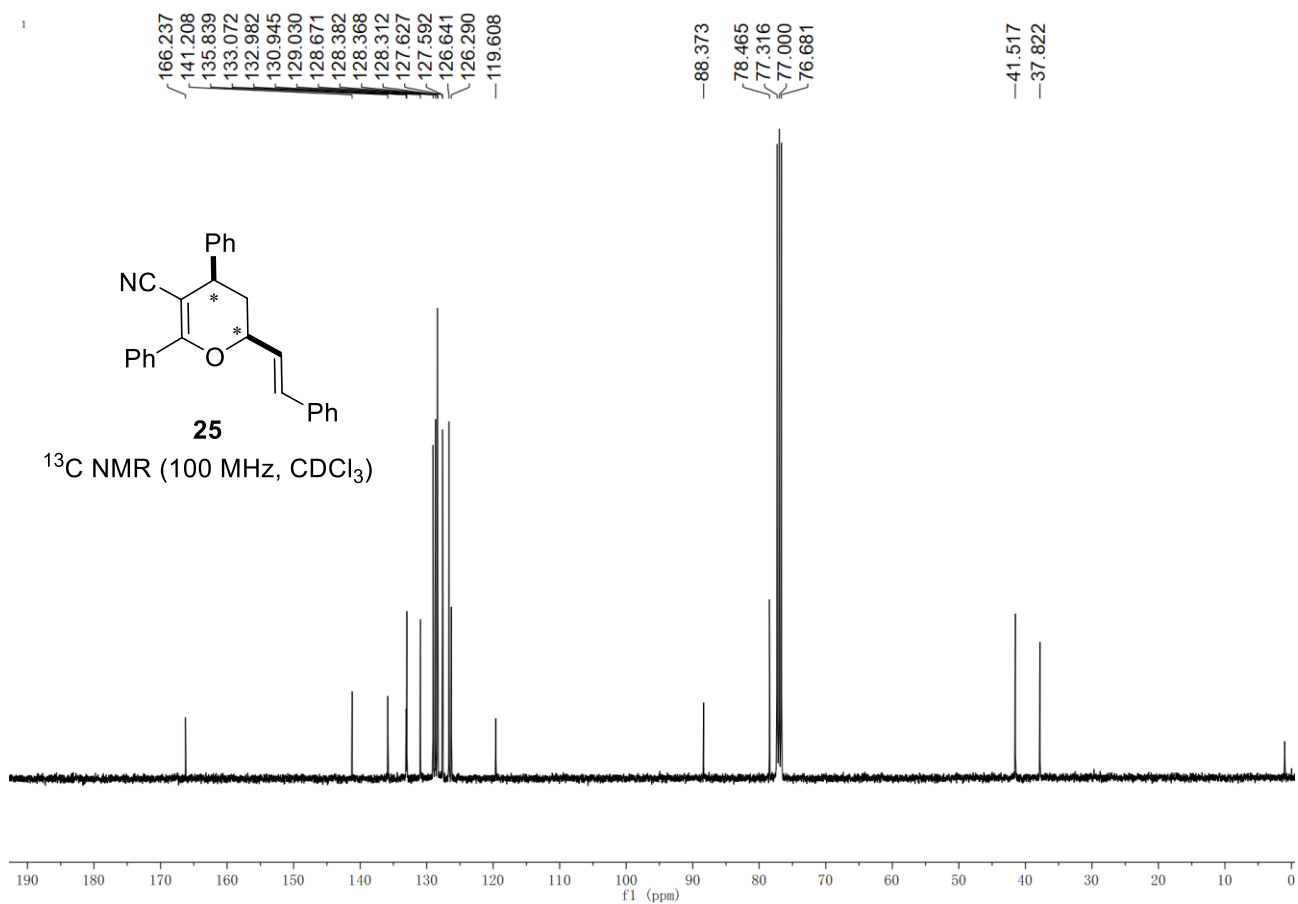

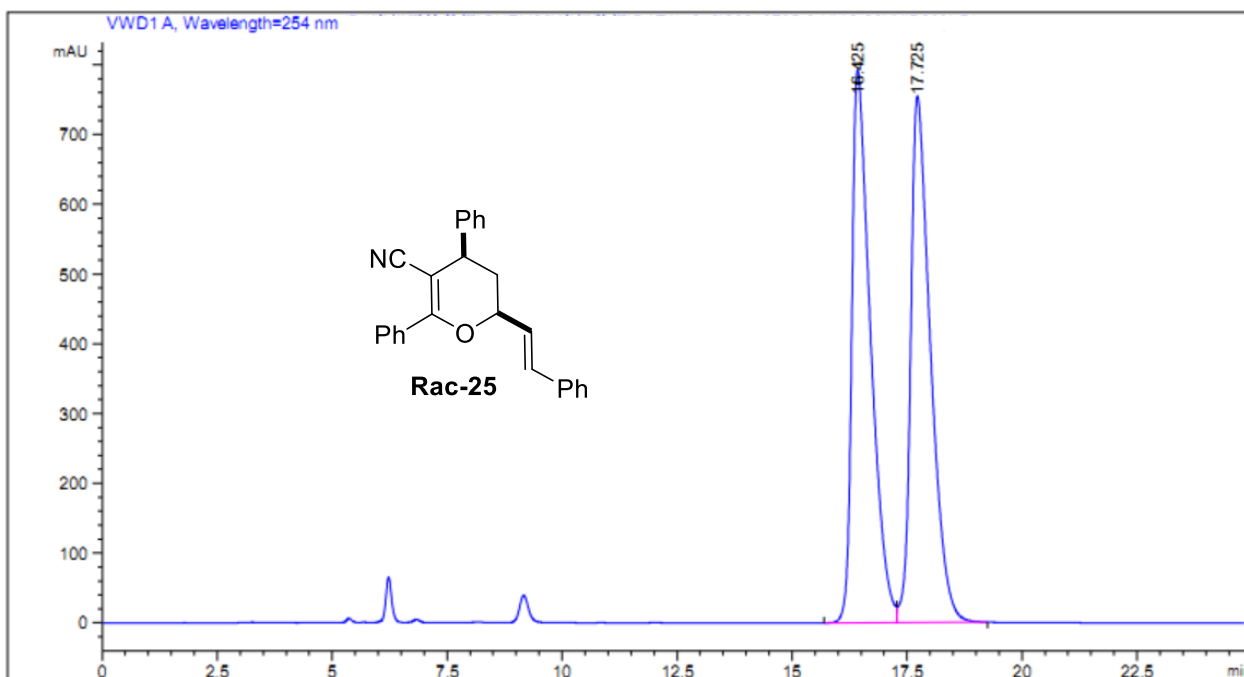

| # | [min]  |     | [min]  | [mAU*s]   | [mAU]     | %       |
|---|--------|-----|--------|-----------|-----------|---------|
| 1 | 16.425 | BV  | 0.4148 | 2.23577e4 | 793.06830 | 49.7986 |
| 2 | 17.725 | VBA | 0.4460 | 2.25386e4 | 754.67340 | 50.2014 |

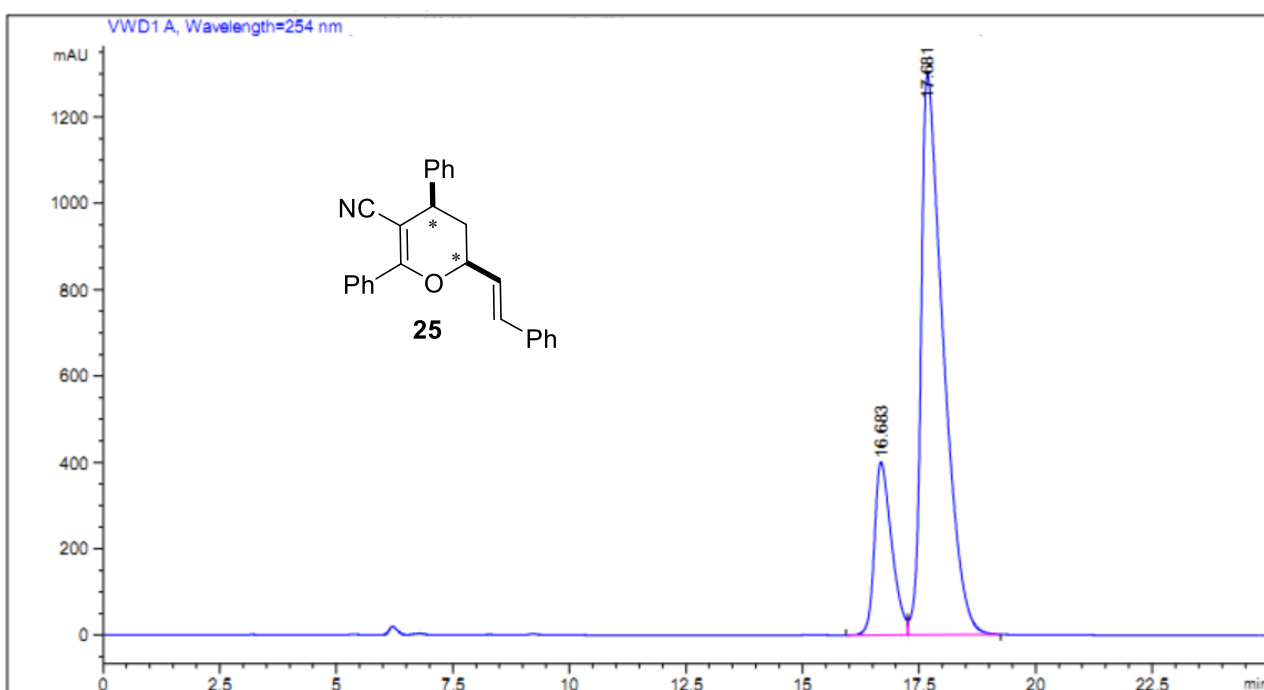

| # | [min]  |     | [min]  | [mAU*s]   | [mAU]      | %       |
|---|--------|-----|--------|-----------|------------|---------|
| 1 | 16.683 | BV  | 0.3874 | 1.03131e4 | 400.96591  | 19.3568 |
| 2 | 17.681 | VBA | 0.4803 | 4.29659e4 | 1299.76550 | 80.6432 |



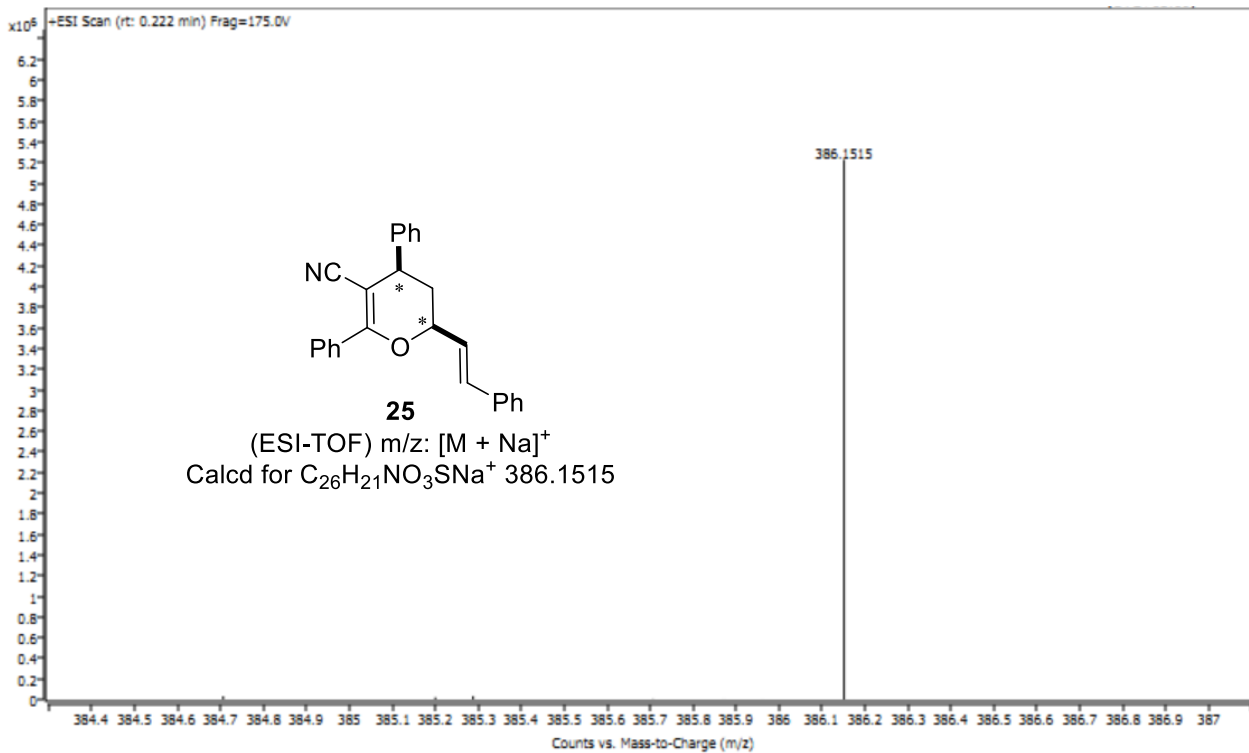

## 9. Computational method

All calculations were carried out with the GAUSSIAN 09 packages<sup>8</sup>. The conformations of intermediates were generated by SYBYL-X 2.0 GA Conf. search module and initially optimized and screened by SYBYL-X 2.0<sup>9</sup>. The structures of diene and its Pd-complexes were calculated at M062X<sup>10-14</sup>/def2-TZVP<sup>15</sup> level and their molecular orbitals were calculated at M062X/def2-TZVPPD. The other geometries of all intermediates and transition states were optimized using B3LYP-D3<sup>16,17</sup> functional together with SDD<sup>18</sup> basis set for Pd atom and the standard 6-31G(d) basis set for the others<sup>19</sup>, since these classical methods have been frequently used in the optimization of metal-complex<sup>20-23</sup>. All the optimized structures were calculated after considering various conformations and confirmed by frequency calculations to be either minima or transition states using the same level of theory. For transition states, intrinsic reaction coordinate analysis (IRC) was done to verify that they connect the right reactants<sup>24</sup>. To take solvent effects into account, solution-phase single-point calculations were performed on the gas-phase geometries. The solution-phase single point energy calculations were done using B3LYP-D3 at LANL2DZ for Pd atom and 6-31++G(d, p)<sup>25-27</sup> level for the others. Solvent effect was accounted for using self-consistent reaction field (SCRF) method, using SMD model and UAKS radii<sup>28,29</sup>. Toluene was used as the solvent. Solution-phase single-point energies corrected by the gas-phase Gibbs free energy corrections were used to describe all the reaction energetics. The molecular orbitals were calculated at B3LYP/def2-TZVPPD. All these energies correspond to the reference state of 1 mol/L, 298 K. All energetics reported throughout the text are in kcal/mol, and the bond lengths are in angstroms (Å). Structures were generated using GaussView 6.0<sup>30</sup> and CYLview<sup>31</sup>.

- 8 M. J. Frisch, G. W. Trucks, H. B. Schlegel, G. E. Scuseria, M. A. Robb, J. R. Cheeseman, G. Scalmani, V. Barone, B. Mennucci, G. A. Petersson, H. Nakatsuji, M. Caricato, X. Li, H. P. Hratchian, A. F. Izmaylov, J. Bloino, G. Zheng, J. L. Sonnenberg, M. Hada, M. Ehara, K. Toyota, R. Fukuda, J. Hasegawa, M. Ishida, T. Nakajima, Y. Honda, O. Kitao, H. Nakai, T. Vreven, Montgomery Jr., J. A., J. E. Peralta, F. Ogliaro, M. J. Bearpark, J. Heyd, E. N. Brothers, K. N. Kudin, V. N. Staroverov, R. Kobayashi, J. Normand, K. Raghavachari, A. P. Rendell, J. C. Burant, S. S. Iyengar, J. Tomasi, M. Cossi, N. Rega, N. J. Millam, M. Klene, J. E. Knox, J. B. Cross, V. Bakken, C. Adamo, J. Jaramillo, R. Gomperts, R. E. Stratmann, O. Yazyev, A. J. Austin, R. Cammi, C. Pomelli, J. W. Ochterski, R. L. Martin, K. Morokuma, V. G. Zakrzewski, G. A. Voth, P. Salvador, J. J. Dannenberg, S. Dapprich, A. D. Daniels, Ö. Farkas, J. B. Foresman, J. V. Ortiz, J.

- Cioslowski and D. J. Fox, Gaussian 09, Gaussian, Inc.: Wallingford, CT, USA, 2009.
- 9 Tripos International, Sybyl-X 2.0, Tripos International, St. Louis, MO, USA, 2012.
  - 10 Y. Zhao and D.G. Truhlar, *Theor. Chem. Acc.*, 2008, **120**, 215–224.
  - 11 T. Giroday, *Comput. Theor. Chem.*, 2014, **1046**, 81–92.
  - 12 B. Yang, Z. Qi, Z. Jing, H. Shuang and H. Zhang, *Org. Electron.*, 2012, **13**, 2568–2574.
  - 13 B. Feng, C. Sun, W. Zhao and S. Zhang, *Environ. Sci-Proc. Imp.*, 2020, doi:10.1039/D0EM00112K.
  - 14 M. A. Salvador, F.C.T. Antonio, G.D. da Silva, F. H. Bartoloni, E. Orestes, M. D. Coutinho-Neto and P. Homem-de-Mello, *Theor. Chem. Acc.*, 2020, **139**, 118–129.
  - 15 F. Weigend and R. Ahlrichs, *Phys Chem Chem Phys.*, 2005, **7**, 3297–3305.
  - 16 A. D. Becke, *J. Chem. Phys.*, 1993, **98**, 5648–5652.
  - 17 C. Lee, W. Yang and R. G. Parr, *Phys. Rev. B.*, 1988, **37**, 785–789.
  - 18 T. H. Jr and P. J. Hay in *Modern Theoretical Chemistry*, Ed. H. F. Schaefer III, Vol. 3 (Plenum, New York, 1977) 1–28.
  - 19 V. A. Rassolov, M. A. Ratner, J. A. Pople, P. C. Redfern and L. A. Curtiss, *J. Comp. Chem.*, 2001, **22**, 976–984.
  - 20 D. Shranami, *J. Org. Chem.*, 2018, **83**, 13911–13921.
  - 21 E. Sultan and K. Duran, *J. Theor. Comput. Chem.*, 2020, **19**, 2050006.
  - 22 W. Huang, S. T. Chang, H. Huang, C. Wang, L. Chen, K. Chen and M. C. Lin, *J. Phys. Chem. C.*, 2020, **124**, 4652–4659.
  - 23 X. Hong, B. M. Trost and K. N. Houk, *J. Am. Chem. Soc.*, 2013, **135**, 6588–6600.
  - 24 K. Fukui, *Acc. Chem. Res.*, 1981, **14**, 363–368.
  - 25 R. C. Binning Jr and L. A. Curtiss, *J. Comp. Chem.*, 1990, **11**, 1206–1216.
  - 26 M. P. McGrath and L. Radom, *J. Chem. Phys.*, 1991, **94**, 511–516.
  - 27 L. A. Curtiss, M. P. McGrath, J.-P. Blaudeau, N. E. Davis, R. C., Binning Jr and L. Radom, *J. Chem. Phys.*, 1995, **103**, 6104–6113.
  - 28 A. V. Marenich, C. J. Cramer and D. G. Truhlar, *J. Phys. Chem. B*, 2009, **113**, 6378–6396.
  - 29 R. F. Ribeiro, A. V. Marenich, C. J. Cramer and D. G. Truhlar, *J. Phys. Chem. B*, 2011, **115**, 14556–14562.
  - 30 R. D. I. I. Dennington, T. A. Keith and J. M. Millam, GaussView, version 6.0, *Semichem Inc Shawnee Mission KS*, 2016.
  - 31 C. Y. Legault, CYLview, version 1.0b; Université de Sherbrooke: Quebec, Canada, 2009; <http://www.cylview.org>.

|                                          |                     |           |           |   |           |           |           |
|------------------------------------------|---------------------|-----------|-----------|---|-----------|-----------|-----------|
| <b>diene-<i>exo</i>-TS</b>               |                     |           |           | C | 2.799900  | 2.812761  | -0.330650 |
| Zero-point                               | correction=1.067183 |           |           | C | 2.500055  | 4.104474  | 0.126371  |
| (Hartree/Particle)                       |                     |           |           | C | 3.332661  | 5.180267  | -0.174836 |
| Thermal correction to Energy=            | 1.134226            |           |           | C | 4.474768  | 4.982121  | -0.951683 |
| Thermal correction to Enthalpy=          | 1.135170            |           |           | C | 4.775898  | 3.702554  | -1.422060 |
| Thermal correction to Gibbs Free Energy= | 0.441481            |           |           | C | 3.946686  | 2.625197  | -1.117408 |
| E(Solv) = -1914.74329543                 |                     |           |           | H | 3.333086  | -4.943494 | 1.746016  |
| C                                        | 0.839968            | 1.454513  | -1.614024 | H | 5.498384  | -4.100310 | 0.896250  |
| H                                        | 1.522270            | 0.840212  | -2.195907 | H | 5.719988  | -1.725792 | 0.122952  |
| C                                        | 3.407484            | -3.915645 | 1.404091  | H | 1.342467  | -3.460344 | 1.855427  |
| C                                        | 4.638859            | -3.437017 | 0.925132  | H | 1.018788  | 2.020065  | 0.613791  |
| C                                        | 4.778586            | -2.119921 | 0.490024  | H | -3.458523 | -2.190647 | 0.427686  |
| C                                        | 3.644756            | -1.323059 | 0.545742  | H | -4.137588 | -3.464099 | -1.598044 |
| C                                        | 2.394102            | -1.768360 | 1.019802  | H | -0.006900 | -3.936622 | -2.667653 |
| C                                        | 2.282689            | -3.098111 | 1.461839  | H | 0.667353  | -2.687355 | -0.656929 |
| O                                        | 3.603684            | -0.010070 | 0.152505  | H | -1.818374 | -5.324747 | -3.773850 |
| C                                        | 2.319965            | 0.433374  | 0.407863  | H | -3.521693 | -4.969141 | -3.432944 |
| C                                        | 1.501224            | -0.608547 | 0.901563  | H | -2.557087 | -3.849019 | -4.400739 |
| C                                        | 1.856616            | 1.707441  | -0.004770 | H | 1.609562  | 4.260460  | 0.730144  |
| N                                        | 0.194186            | -0.338037 | 1.028605  | H | 3.089238  | 6.171554  | 0.196784  |
| C                                        | -1.361998           | -2.350722 | 0.006647  | H | 5.125012  | 5.818839  | -1.190377 |
| C                                        | -2.712954           | -2.576329 | -0.258457 | H | 5.662027  | 3.541705  | -2.029655 |
| C                                        | -3.083607           | -3.290110 | -1.396628 | H | 4.190767  | 1.634740  | -1.482290 |
| C                                        | -2.122335           | -3.784860 | -2.285203 | C | -0.433174 | 0.916853  | -1.312725 |
| C                                        | -0.770527           | -3.554103 | -1.994906 | C | -1.512171 | 1.735963  | -0.900533 |
| C                                        | -0.384554           | -2.846802 | -0.859477 | C | -2.705590 | 1.227171  | -0.479837 |
| C                                        | -2.526999           | -4.524573 | -3.535796 | H | -2.810278 | 0.147997  | -0.456009 |
| S                                        | -0.937077           | -1.437620 | 1.505515  | C | -3.841641 | 1.982174  | 0.010731  |
| O                                        | -2.142550           | -0.666180 | 1.845150  | C | -4.027644 | 3.351561  | -0.265570 |
| O                                        | -0.421829           | -2.399593 | 2.497679  | C | -4.798458 | 1.319672  | 0.804937  |
|                                          |                     |           |           | C | -5.129848 | 4.031334  | 0.238681  |

|                                          |                     |           |           |   |           |           |           |
|------------------------------------------|---------------------|-----------|-----------|---|-----------|-----------|-----------|
| H                                        | -3.316932           | 3.873363  | -0.899376 | C | -0.206796 | 2.522164  | -0.028679 |
| C                                        | -5.895913           | 2.004999  | 1.314571  | N | -0.936490 | -0.063818 | 0.790256  |
| H                                        | -4.637977           | 0.274556  | 1.050678  | C | -3.105100 | -1.470859 | 0.522193  |
| C                                        | -6.067403           | 3.362052  | 1.031679  | C | -4.004773 | -0.676320 | 1.235315  |
| H                                        | -5.265102           | 5.084694  | 0.010021  | C | -5.317500 | -0.573576 | 0.790333  |
| H                                        | -6.616586           | 1.483166  | 1.937471  | C | -5.751614 | -1.260341 | -0.354792 |
| H                                        | -6.927217           | 3.896741  | 1.425037  | C | -4.831393 | -2.055683 | -1.044579 |
| H                                        | -1.338960           | 2.811002  | -0.866849 | C | -3.509291 | -2.167880 | -0.611442 |
| H                                        | -0.604458           | -0.149074 | -1.402747 | C | -7.185599 | -1.153779 | -0.811517 |
| H                                        | 0.841822            | 2.498558  | -1.920706 | S | -1.414796 | -1.605389 | 1.088548  |
| -----                                    |                     |           |           | O | -1.417348 | -1.901309 | 2.532062  |
| <b>diene-endo-TS</b>                     |                     |           |           | O | -0.741730 | -2.594768 | 0.209191  |
| Zero-point                               | correction=0.509294 |           |           | C | 0.091943  | 3.985527  | -0.109316 |
| (Hartree/Particle)                       |                     |           |           | C | -0.941193 | 4.900204  | 0.133106  |
| Thermal correction to Energy=0.541050    |                     |           |           | C | -0.718184 | 6.273095  | 0.039267  |
| Thermal correction to Enthalpy=0.541994  |                     |           |           | C | 0.545014  | 6.752263  | -0.308153 |
| Thermal correction to Gibbs Free Energy= |                     |           |           | C | 1.579378  | 5.849107  | -0.560837 |
| 0.441428                                 |                     |           |           | C | 1.356289  | 4.476874  | -0.466912 |
| E(Solv) = -1914.75064850                 |                     |           |           | H | 3.625120  | -2.879474 | 2.304856  |
| C                                        | -0.523863           | 2.014159  | -1.749314 | H | 5.334507  | -1.122563 | 1.994162  |
| H                                        | -1.455137           | 2.540589  | -1.951680 | H | 4.679643  | 1.172171  | 1.228376  |
| C                                        | 3.317416            | -1.889289 | 1.984249  | H | 1.224010  | -2.409926 | 1.896434  |
| C                                        | 4.290462            | -0.892190 | 1.803332  | H | -1.201028 | 2.322335  | 0.369323  |
| C                                        | 3.942738            | 0.389902  | 1.375831  | H | -3.672151 | -0.148326 | 2.122458  |
| C                                        | 2.596255            | 0.617520  | 1.136380  | H | -6.022119 | 0.046556  | 1.339158  |
| C                                        | 1.596072            | -0.355702 | 1.323909  | H | -5.152283 | -2.597523 | -1.930596 |
| C                                        | 1.968427            | -1.637427 | 1.753450  | H | -2.794308 | -2.791638 | -1.136091 |
| O                                        | 2.064697            | 1.806659  | 0.682937  | H | -7.520135 | -0.110424 | -0.836739 |
| C                                        | 0.698322            | 1.618676  | 0.609267  | H | -7.319728 | -1.577354 | -1.811391 |
| C                                        | 0.345441            | 0.301216  | 0.960578  | H | -7.857418 | -1.691157 | -0.130217 |
|                                          |                     |           |           | H | -1.926407 | 4.528661  | 0.404124  |

|                                          |                     |           |           |                          |           |           |           |
|------------------------------------------|---------------------|-----------|-----------|--------------------------|-----------|-----------|-----------|
| H                                        | -1.530400           | 6.966643  | 0.237997  | E(Solv) = -4116.08708905 |           |           |           |
| H                                        | 0.722675            | 7.821311  | -0.382632 | C                        | 0.169423  | 2.582070  | 3.063625  |
| H                                        | 2.565899            | 6.214761  | -0.832008 | H                        | 0.188231  | 2.574899  | 4.149221  |
| H                                        | 2.166515            | 3.782559  | -0.657740 | C                        | 6.793082  | -2.000134 | -1.540711 |
| C                                        | -0.544614           | 0.598209  | -1.946084 | C                        | 6.976074  | -1.012198 | -2.523020 |
| C                                        | 0.678799            | -0.090774 | -1.976496 | C                        | 6.402294  | 0.253586  | -2.398933 |
| C                                        | 0.802615            | -1.455445 | -1.906633 | C                        | 5.641512  | 0.482012  | -1.262972 |
| H                                        | -0.106384           | -2.045432 | -1.915865 | C                        | 5.431500  | -0.488114 | -0.267130 |
| C                                        | 2.026154            | -2.182719 | -1.674022 | C                        | 6.024578  | -1.751090 | -0.406916 |
| C                                        | 3.303977            | -1.589161 | -1.756760 | O                        | 5.006544  | 1.663315  | -0.992255 |
| C                                        | 1.936182            | -3.533275 | -1.274505 | C                        | 4.348959  | 1.510295  | 0.220641  |
| C                                        | 4.442264            | -2.319764 | -1.451493 | C                        | 4.570779  | 0.145420  | 0.732644  |
| H                                        | 3.400944            | -0.552985 | -2.062292 | C                        | 3.560395  | 2.452945  | 0.774970  |
| C                                        | 3.080374            | -4.260989 | -0.967948 | N                        | 3.976005  | -0.222111 | 1.830521  |
| H                                        | 0.953704            | -3.979687 | -1.165729 | C                        | 2.371952  | -1.711613 | 3.244641  |
| C                                        | 4.336320            | -3.658170 | -1.056677 | C                        | 2.309468  | -1.049157 | 4.473529  |
| H                                        | 5.418251            | -1.847916 | -1.514152 | C                        | 1.071361  | -0.880768 | 5.084078  |
| H                                        | 2.993051            | -5.295895 | -0.650519 | C                        | -0.106124 | -1.354118 | 4.479870  |
| H                                        | 5.231116            | -4.225083 | -0.815798 | C                        | -0.006832 | -2.042750 | 3.267627  |
| H                                        | 1.576366            | 0.522864  | -1.921197 | C                        | 1.228237  | -2.231242 | 2.645784  |
| H                                        | -1.479689           | 0.047680  | -1.963654 | C                        | -1.448082 | -1.083191 | 5.112100  |
| H                                        | 0.325470            | 2.504116  | -2.226967 | S                        | 3.931125  | -1.804193 | 2.377166  |
| -----                                    |                     |           |           | O                        | 5.015770  | -2.014060 | 3.345410  |
| <b>com-INT1-2a</b>                       |                     |           |           | O                        | 3.763775  | -2.759609 | 1.264002  |
| Zero-point                               | correction=1.064644 |           |           | C                        | 3.143979  | 3.737153  | 0.243339  |
| (Hartree/Particle)                       |                     |           |           | C                        | 2.442959  | 4.609643  | 1.100879  |
| Thermal correction to Energy=            | 1.133604            |           |           | C                        | 2.005885  | 5.852484  | 0.654434  |
| Thermal correction to Enthalpy=          | 1.134548            |           |           | C                        | 2.249440  | 6.245942  | -0.664526 |
| Thermal correction to Gibbs Free Energy= | 0.953350            |           |           | C                        | 2.917672  | 5.378601  | -1.533897 |
|                                          |                     |           |           | C                        | 3.364031  | 4.137351  | -1.091419 |
|                                          |                     |           |           | H                        | 7.256744  | -2.973053 | -1.668660 |

|   |           |           |           |    |           |           |           |
|---|-----------|-----------|-----------|----|-----------|-----------|-----------|
| H | 7.577197  | -1.236139 | -3.399638 | H  | 0.388016  | 2.339627  | 0.356014  |
| H | 6.527540  | 1.024808  | -3.150279 | H  | 0.861041  | 0.613376  | 2.879465  |
| H | 5.866102  | -2.519317 | 0.337378  | H  | -0.186598 | 3.492165  | 2.587193  |
| H | 3.158790  | 2.172216  | 1.743454  | Pd | -1.058959 | -0.040484 | 0.217841  |
| H | 3.216143  | -0.665610 | 4.928638  | P  | -2.873107 | 1.402443  | 0.087415  |
| H | 1.010664  | -0.356266 | 6.034467  | P  | -1.446197 | -2.137176 | -0.706974 |
| H | -0.901081 | -2.420210 | 2.782346  | C  | -2.332911 | 2.697117  | -1.109863 |
| H | 1.296885  | -2.751173 | 1.700273  | C  | -2.533798 | 2.547086  | -2.489926 |
| H | -1.660103 | -0.006621 | 5.113806  | C  | -1.505832 | 3.741846  | -0.662720 |
| H | -2.254446 | -1.581782 | 4.565688  | C  | -1.901519 | 3.398358  | -3.397235 |
| H | -1.480726 | -1.422440 | 6.154106  | H  | -3.182837 | 1.762588  | -2.861964 |
| H | 2.240348  | 4.291634  | 2.118817  | C  | -0.878183 | 4.593627  | -1.569563 |
| H | 1.475893  | 6.514769  | 1.333277  | H  | -1.341351 | 3.880250  | 0.400657  |
| H | 1.914210  | 7.218456  | -1.014783 | C  | -1.063725 | 4.417679  | -2.942730 |
| H | 3.092552  | 5.673172  | -2.564900 | H  | -2.067497 | 3.261948  | -4.462629 |
| H | 3.870331  | 3.466221  | -1.772109 | H  | -0.226063 | 5.378127  | -1.201436 |
| C | 0.531241  | 1.501251  | 2.350502  | H  | -0.562482 | 5.072848  | -3.649539 |
| C | 0.548673  | 1.412916  | 0.896832  | C  | -4.495946 | 0.827814  | -0.565983 |
| C | 1.157176  | 0.329657  | 0.240575  | C  | -5.719418 | 1.146668  | 0.037547  |
| H | 1.602163  | -0.443562 | 0.853784  | C  | -4.494049 | -0.050743 | -1.662044 |
| C | 1.618756  | 0.360860  | -1.152066 | C  | -6.911162 | 0.607424  | -0.450980 |
| C | 1.294432  | 1.403095  | -2.043568 | H  | -5.744861 | 1.810052  | 0.894926  |
| C | 2.450636  | -0.673267 | -1.617937 | C  | -5.684399 | -0.572868 | -2.160136 |
| C | 1.782283  | 1.400583  | -3.346036 | H  | -3.553484 | -0.354109 | -2.108408 |
| H | 0.652776  | 2.214479  | -1.720527 | C  | -6.898539 | -0.248516 | -1.551968 |
| C | 2.934375  | -0.675260 | -2.924415 | H  | -7.851164 | 0.859372  | 0.032825  |
| H | 2.733863  | -1.467008 | -0.933578 | H  | -5.657857 | -1.259637 | -3.000455 |
| C | 2.603502  | 0.362214  | -3.797848 | H  | -7.826628 | -0.670892 | -1.926758 |
| H | 1.514803  | 2.217046  | -4.012140 | C  | -3.323100 | 2.350653  | 1.587913  |
| H | 3.588523  | -1.478822 | -3.251152 | C  | -3.941284 | 3.610060  | 1.551420  |
| H | 2.981665  | 0.364102  | -4.816316 | C  | -3.029566 | 1.769554  | 2.828705  |

|   |           |           |           |
|---|-----------|-----------|-----------|
| C | -4.264583 | 4.270243  | 2.735938  |
| H | -4.164218 | 4.071649  | 0.594039  |
| C | -3.367001 | 2.424225  | 4.013930  |
| H | -2.514121 | 0.814379  | 2.853422  |
| C | -3.981896 | 3.675460  | 3.969282  |
| H | -4.740346 | 5.246385  | 2.698600  |
| H | -3.135049 | 1.964534  | 4.970666  |
| H | -4.235833 | 4.191014  | 4.891325  |
| C | -1.151111 | -2.112790 | -2.521127 |
| C | -0.969308 | -3.273202 | -3.289496 |
| C | -1.070099 | -0.862593 | -3.150746 |
| C | -0.736994 | -3.181421 | -4.661170 |
| H | -0.983715 | -4.246663 | -2.809052 |
| C | -0.835772 | -0.771228 | -4.522151 |
| H | -1.155108 | 0.038935  | -2.553315 |
| C | -0.673473 | -1.930325 | -5.280734 |
| H | -0.595632 | -4.086422 | -5.245780 |
| H | -0.755213 | 0.207339  | -4.985606 |
| H | -0.481939 | -1.862088 | -6.348107 |
| C | -3.174733 | -2.748753 | -0.508752 |
| C | -3.894646 | -2.286184 | 0.601616  |
| C | -3.802032 | -3.617904 | -1.409797 |
| C | -5.214676 | -2.682395 | 0.810225  |
| H | -3.419262 | -1.578778 | 1.276120  |
| C | -5.126283 | -4.006753 | -1.208078 |
| H | -3.265285 | -3.975220 | -2.282039 |
| C | -5.835107 | -3.539558 | -0.099300 |
| H | -5.765706 | -2.299362 | 1.664211  |
| H | -5.607212 | -4.671497 | -1.920740 |
| H | -6.870059 | -3.834662 | 0.049125  |
| C | -0.467695 | -3.595476 | -0.163925 |

|   |           |           |           |
|---|-----------|-----------|-----------|
| C | -0.955767 | -4.482691 | 0.805680  |
| C | 0.855276  | -3.741735 | -0.613831 |
| C | -0.132173 | -5.483283 | 1.324715  |
| H | -1.979608 | -4.391400 | 1.155127  |
| C | 1.673781  | -4.743096 | -0.096085 |
| H | 1.245213  | -3.058820 | -1.359986 |
| C | 1.184018  | -5.613758 | 0.880239  |
| H | -0.521556 | -6.159934 | 2.080571  |
| H | 2.703046  | -4.820213 | -0.430000 |
| H | 1.827752  | -6.383034 | 1.296206  |

**2a-TS1**

Zero-point correction=1.065047

(Hartree/Particle)

Thermal correction to Energy=1.132766

Thermal correction to Enthalpy=1.133710

Thermal correction to Gibbs Free Energy=  
0.955246

E(Solv) = -4116.04728734

|   |           |           |           |
|---|-----------|-----------|-----------|
| C | -2.473749 | 1.383475  | -0.650999 |
| H | -2.776404 | 2.001787  | 0.187922  |
| C | -6.085864 | -0.926700 | 4.305265  |
| C | -6.718288 | 0.327737  | 4.242295  |
| C | -6.647061 | 1.115450  | 3.093502  |
| C | -5.915219 | 0.602210  | 2.031533  |
| C | -5.273661 | -0.652408 | 2.061435  |
| C | -5.365510 | -1.431700 | 3.226525  |
| O | -5.728276 | 1.237863  | 0.834650  |
| C | -4.970233 | 0.377770  | 0.045031  |



|   |           |           |           |    |           |           |           |
|---|-----------|-----------|-----------|----|-----------|-----------|-----------|
| C | -4.641883 | -0.798690 | 0.751861  | H  | -4.176117 | 1.045031  | -3.798301 |
| C | -4.361247 | 0.801953  | -1.156531 | H  | -4.828661 | 2.954503  | -5.228407 |
| N | -3.822068 | -1.694698 | 0.176051  | H  | -5.828504 | 4.992872  | -4.203373 |
| C | -2.455033 | -3.870330 | -0.337212 | H  | -6.151860 | 5.093172  | -1.739144 |
| C | -1.836257 | -5.073359 | 0.008719  | H  | -5.502351 | 3.180824  | -0.317984 |
| C | -1.274986 | -5.867512 | -0.987879 | C  | -1.683354 | 0.250162  | -0.381575 |
| C | -1.322713 | -5.481722 | -2.333640 | C  | -0.826671 | -0.364361 | -1.335679 |
| C | -1.964233 | -4.280230 | -2.656899 | C  | -0.051420 | -1.504989 | -1.006480 |
| C | -2.524925 | -3.471234 | -1.671852 | H  | -0.325343 | -2.037790 | -0.102600 |
| C | -0.667176 | -6.312440 | -3.407014 | C  | 0.775661  | -2.258654 | -1.955318 |
| S | -3.090098 | -2.878102 | 1.010977  | C  | 1.128562  | -1.766141 | -3.226987 |
| O | -3.985700 | -3.756278 | 1.795103  | C  | 1.288222  | -3.509627 | -1.564167 |
| O | -1.918725 | -2.341692 | 1.759761  | C  | 1.975405  | -2.489381 | -4.064461 |
| C | -4.804888 | 1.968368  | -1.956946 | H  | 0.756220  | -0.799446 | -3.552005 |
| C | -4.613402 | 1.933033  | -3.348512 | C  | 2.147077  | -4.222405 | -2.394877 |
| C | -4.976978 | 3.009670  | -4.153467 | H  | 1.009545  | -3.913509 | -0.598628 |
| C | -5.536785 | 4.152959  | -3.578945 | C  | 2.499149  | -3.717806 | -3.650154 |
| C | -5.719537 | 4.206643  | -2.195269 | H  | 2.236493  | -2.087703 | -5.040059 |
| C | -5.354440 | 3.130157  | -1.388777 | H  | 2.541868  | -5.177076 | -2.058586 |
| H | -6.167004 | -1.517275 | 5.213012  | H  | 3.170085  | -4.274456 | -4.298256 |
| H | -7.274566 | 0.691487  | 5.101617  | H  | -0.828059 | 0.036862  | -2.347514 |
| H | -7.130429 | 2.084068  | 3.023218  | H  | -1.727263 | -0.209646 | 0.600818  |
| H | -4.895972 | -2.406557 | 3.265981  | H  | -2.237462 | 1.945450  | -1.548296 |
| H | -4.043686 | -0.046790 | -1.754468 | Pd | 1.125286  | 0.258267  | -0.284435 |
| H | -1.807355 | -5.388041 | 1.046103  | P  | 2.826716  | -0.799349 | 0.909939  |
| H | -0.788362 | -6.800937 | -0.716689 | P  | 1.417970  | 2.576017  | -0.241040 |
| H | -2.010644 | -3.963794 | -3.695862 | C  | 2.433567  | -2.507924 | 1.440959  |
| H | -3.014457 | -2.538781 | -1.917303 | C  | 1.155146  | -2.750167 | 1.966246  |
| H | 0.286321  | -5.860556 | -3.707863 | C  | 3.313691  | -3.582172 | 1.256297  |
| H | -0.460985 | -7.329459 | -3.058384 | C  | 0.762391  | -4.043434 | 2.305721  |
| H | -1.295664 | -6.379503 | -4.302024 | H  | 0.440951  | -1.941278 | 2.075942  |

|   |           |           |           |   |           |          |           |
|---|-----------|-----------|-----------|---|-----------|----------|-----------|
| C | 2.914347  | -4.878495 | 1.585385  | C | 2.020868  | 4.881668 | 3.153944  |
| H | 4.300018  | -3.409937 | 0.839206  | H | 2.561250  | 5.042330 | 1.078205  |
| C | 1.640553  | -5.111958 | 2.108695  | C | 0.752553  | 2.919701 | 3.775337  |
| H | -0.239243 | -4.198960 | 2.690743  | H | 0.329130  | 1.535741 | 2.176314  |
| H | 3.599140  | -5.707413 | 1.427504  | C | 1.374820  | 4.118456 | 4.128386  |
| H | 1.330706  | -6.124066 | 2.354321  | H | 2.510297  | 5.812628 | 3.427085  |
| C | 4.389561  | -0.988073 | -0.033540 | H | 0.263887  | 2.312596 | 4.531274  |
| C | 4.282988  | -1.296148 | -1.399382 | H | 1.364489  | 4.452568 | 5.162054  |
| C | 5.659663  | -0.823177 | 0.534449  | C | 0.082818  | 3.517408 | -1.078180 |
| C | 5.427214  | -1.434857 | -2.181884 | C | -0.838206 | 4.312662 | -0.387065 |
| H | 3.304539  | -1.417307 | -1.849256 | C | -0.090421 | 3.315250 | -2.458300 |
| C | 6.803970  | -0.949296 | -0.255612 | C | -1.919701 | 4.886312 | -1.061979 |
| H | 5.754010  | -0.586215 | 1.588822  | H | -0.719246 | 4.472768 | 0.679477  |
| C | 6.690919  | -1.253988 | -1.613739 | C | -1.163421 | 3.895997 | -3.128925 |
| H | 5.325419  | -1.678389 | -3.235402 | H | 0.612819  | 2.686572 | -2.999450 |
| H | 7.784284  | -0.811968 | 0.192395  | C | -2.087957 | 4.678603 | -2.429275 |
| H | 7.583561  | -1.351705 | -2.225458 | H | -2.641070 | 5.483932 | -0.512028 |
| C | 3.331530  | 0.056444  | 2.453384  | H | -1.294050 | 3.724718 | -4.193723 |
| C | 3.046319  | -0.464434 | 3.721432  | H | -2.945876 | 5.097057 | -2.943537 |
| C | 3.928243  | 1.325009  | 2.357345  | C | 2.925788  | 3.252932 | -1.040836 |
| C | 3.347821  | 0.271115  | 4.869784  | C | 3.022999  | 4.588936 | -1.460322 |
| H | 2.587644  | -1.442813 | 3.813979  | C | 4.014243  | 2.394083 | -1.245648 |
| C | 4.242260  | 2.048194  | 3.503573  | C | 4.199879  | 5.058847 | -2.042528 |
| H | 4.143640  | 1.751215  | 1.383082  | H | 2.172254  | 5.253743 | -1.344005 |
| C | 3.945768  | 1.526177  | 4.764934  | C | 5.192601  | 2.864985 | -1.825870 |
| H | 3.116474  | -0.143746 | 5.846977  | H | 3.931730  | 1.350946 | -0.967202 |
| H | 4.693038  | 3.031250  | 3.410390  | C | 5.288410  | 4.200010 | -2.220497 |
| H | 4.175610  | 2.098590  | 5.659073  | H | 4.266333  | 6.094869 | -2.363143 |
| C | 1.425587  | 3.248006  | 1.466062  | H | 6.023291  | 2.181118 | -1.975216 |
| C | 2.045593  | 4.450441  | 1.827252  | H | 6.202307  | 4.570099 | -2.676786 |
| C | 0.781954  | 2.484553  | 2.452186  |   |           |          |           |

|                                          |                |           |           |   |           |           |           |
|------------------------------------------|----------------|-----------|-----------|---|-----------|-----------|-----------|
| <b>2a-TS1'</b>                           |                |           |           | C | -5.075125 | -2.664156 | -0.272054 |
| Zero-point                               | correction=    | 1.065449  |           | C | -5.344544 | -3.793792 | 0.518206  |
| (Hartree/Particle)                       |                |           |           | C | -5.954703 | -4.922439 | -0.023995 |
| Thermal correction to Energy=            | 1.133031       |           |           | C | -6.302977 | -4.946598 | -1.375668 |
| Thermal correction to Enthalpy=          | 1.133975       |           |           | C | -6.033825 | -3.832992 | -2.174165 |
| Thermal correction to Gibbs Free Energy= | 0.955893       |           |           | C | -5.423142 | -2.703061 | -1.633160 |
| E(Solv) =                                | -4116.04858361 |           |           | H | -4.954368 | 5.392201  | -0.873385 |
|                                          |                |           |           | H | -5.772474 | 4.397361  | -2.986352 |
| C                                        | -2.463182      | -2.054054 | 0.072917  | H | -5.870763 | 1.908734  | -3.262707 |
| H                                        | -2.412139      | -2.892628 | 0.760543  | H | -4.155764 | 3.952438  | 0.985021  |
| C                                        | -4.974707      | 4.311576  | -0.980879 | H | -4.318181 | -1.576221 | 1.439205  |
| C                                        | -5.442168      | 3.747988  | -2.180585 | H | -2.748182 | -0.531549 | 4.361678  |
| C                                        | -5.498190      | 2.365288  | -2.351785 | H | -0.792936 | -1.817891 | 5.193421  |
| C                                        | -5.059660      | 1.585222  | -1.290053 | H | 1.845447  | 1.118010  | 3.507175  |
| C                                        | -4.557074      | 2.119574  | -0.085774 | H | -0.107850 | 2.414836  | 2.701341  |
| C                                        | -4.532861      | 3.513946  | 0.070803  | H | 2.050055  | -2.115207 | 4.165115  |
| O                                        | -5.068579      | 0.218263  | -1.273382 | H | 2.770729  | -0.659925 | 4.864636  |
| C                                        | -4.588357      | -0.161812 | -0.021247 | H | 1.702607  | -1.685052 | 5.840629  |
| C                                        | -4.204283      | 0.962869  | 0.738566  | H | -5.071799 | -3.777853 | 1.570588  |
| C                                        | -4.384536      | -1.511683 | 0.355927  | H | -6.160698 | -5.781400 | 0.608905  |
| N                                        | -3.607909      | 0.767014  | 1.929666  | H | -6.779870 | -5.824417 | -1.802648 |
| C                                        | -1.539679      | 1.006575  | 3.466597  | H | -6.302375 | -3.842870 | -3.227173 |
| C                                        | -1.738677      | -0.181814 | 4.175486  | H | -5.223199 | -1.841795 | -2.258303 |
| C                                        | -0.637484      | -0.902246 | 4.627402  | C | -1.707852 | -0.899865 | 0.365611  |
| C                                        | 0.672649       | -0.458510 | 4.382363  | C | -1.531981 | 0.117349  | -0.601215 |
| C                                        | 0.843715       | 0.744158  | 3.689418  | C | -0.994590 | 1.394971  | -0.324991 |
| C                                        | -0.251026      | 1.480819  | 3.232653  | H | -1.052026 | 1.753661  | 0.695387  |
| C                                        | 1.861737       | -1.268519 | 4.839935  | C | -0.956406 | 2.447483  | -1.352218 |
| S                                        | -2.953619      | 1.930497  | 2.849449  | C | -0.486461 | 2.202210  | -2.653923 |
| O                                        | -3.812015      | 2.261389  | 3.999782  | C | -1.391425 | 3.739912  | -1.020077 |
| O                                        | -2.377496      | 3.073409  | 2.091440  | C | -0.436799 | 3.226105  | -3.595284 |

|    |           |           |           |   |           |           |           |
|----|-----------|-----------|-----------|---|-----------|-----------|-----------|
| H  | -0.112501 | 1.213989  | -2.905765 | C | 6.020438  | -3.202755 | 0.413916  |
| C  | -1.367846 | 4.756768  | -1.973135 | H | 5.294391  | -4.642852 | 1.843662  |
| H  | -1.747231 | 3.925781  | -0.013661 | H | 6.434807  | -1.692692 | -1.071984 |
| C  | -0.881484 | 4.509231  | -3.257992 | H | 7.067757  | -3.397315 | 0.626504  |
| H  | -0.040712 | 3.028039  | -4.587519 | C | 0.621443  | -3.450396 | 0.530262  |
| H  | -1.725050 | 5.747852  | -1.707082 | C | 0.156805  | -4.669372 | 0.024303  |
| H  | -0.846916 | 5.308052  | -3.993703 | C | 0.309350  | -3.090402 | 1.850288  |
| H  | -1.849286 | -0.101537 | -1.620052 | C | -0.608426 | -5.517121 | 0.828255  |
| H  | -1.445650 | -0.686700 | 1.395606  | H | 0.379053  | -4.951164 | -0.999596 |
| H  | -2.527988 | -2.348869 | -0.972846 | C | -0.437957 | -3.945565 | 2.656202  |
| Pd | 0.761730  | -0.046534 | -0.233065 | H | 0.618636  | -2.122484 | 2.233001  |
| P  | 1.570482  | -2.244183 | -0.471058 | C | -0.902513 | -5.160638 | 2.144853  |
| P  | 2.527797  | 1.452898  | -0.162129 | H | -0.978319 | -6.454200 | 0.422050  |
| C  | 1.364028  | -2.820611 | -2.203776 | H | -0.680266 | -3.648428 | 3.671366  |
| C  | 2.178835  | -3.808401 | -2.774669 | H | -1.501230 | -5.819965 | 2.766738  |
| C  | 0.347927  | -2.240853 | -2.978752 | C | 3.138370  | 1.790283  | -1.860919 |
| C  | 1.977809  | -4.208297 | -4.096403 | C | 3.875544  | 2.936320  | -2.192336 |
| H  | 2.972709  | -4.258014 | -2.187035 | C | 2.842202  | 0.858931  | -2.867859 |
| C  | 0.145985  | -2.644070 | -4.298148 | C | 4.316355  | 3.137719  | -3.500413 |
| H  | -0.275125 | -1.468486 | -2.539202 | H | 4.083850  | 3.682626  | -1.432423 |
| C  | 0.962811  | -3.627735 | -4.859868 | C | 3.287814  | 1.057837  | -4.173925 |
| H  | 2.615821  | -4.973060 | -4.530385 | H | 2.241952  | -0.012852 | -2.626792 |
| H  | -0.643952 | -2.186748 | -4.887260 | C | 4.026424  | 2.198734  | -4.492675 |
| H  | 0.811016  | -3.938902 | -5.889486 | H | 4.881798  | 4.032301  | -3.745726 |
| C  | 3.316920  | -2.684648 | -0.120135 | H | 3.045808  | 0.327293  | -4.940762 |
| C  | 3.678137  | -3.643309 | 0.833357  | H | 4.367380  | 2.361009  | -5.511256 |
| C  | 4.325323  | -1.987947 | -0.805567 | C | 3.999937  | 0.845911  | 0.758453  |
| C  | 5.025731  | -3.897625 | 1.099945  | C | 3.799807  | -0.094610 | 1.777494  |
| H  | 2.909705  | -4.192234 | 1.366948  | C | 5.297447  | 1.304426  | 0.498141  |
| C  | 5.666260  | -2.248956 | -0.544227 | C | 4.874636  | -0.563403 | 2.530818  |
| H  | 4.059299  | -1.231040 | -1.536864 | H | 2.798069  | -0.469054 | 1.960031  |

|   |          |           |           |   |           |           |           |
|---|----------|-----------|-----------|---|-----------|-----------|-----------|
| C | 6.374291 | 0.828055  | 1.245015  | C | 5.184737  | -1.099343 | 2.453948  |
| H | 5.469740 | 2.024274  | -0.295063 | C | 4.609552  | -0.109468 | 1.666550  |
| C | 6.164607 | -0.104509 | 2.263123  | C | 3.916864  | 0.995027  | 2.198037  |
| H | 4.706557 | -1.304803 | 3.305436  | C | 3.812972  | 1.135449  | 3.588299  |
| H | 7.378233 | 1.184239  | 1.031013  | O | 4.614034  | -0.061815 | 0.300346  |
| H | 7.005882 | -0.479740 | 2.838846  | C | 3.883136  | 1.074310  | -0.054029 |
| C | 2.283637 | 3.118166  | 0.560790  | C | 3.446857  | 1.762764  | 1.049328  |
| C | 2.633018 | 3.374743  | 1.895915  | C | 3.640587  | 1.318883  | -1.507588 |
| C | 1.623106 | 4.113850  | -0.174873 | N | 2.721928  | 2.948360  | 0.997611  |
| C | 2.308797 | 4.593788  | 2.488903  | C | 0.471286  | 4.298320  | 1.011870  |
| H | 3.168700 | 2.624994  | 2.468185  | C | -0.517918 | 4.973441  | 1.725461  |
| C | 1.309295 | 5.334700  | 0.420605  | C | -1.387850 | 5.833102  | 1.055169  |
| H | 1.352648 | 3.938145  | -1.208885 | C | -1.280104 | 6.037347  | -0.325808 |
| C | 1.641781 | 5.576067  | 1.753846  | C | -0.249716 | 5.382799  | -1.015109 |
| H | 2.579482 | 4.776147  | 3.524983  | C | 0.619967  | 4.516426  | -0.358137 |
| H | 0.787640 | 6.088438  | -0.160978 | C | -2.264562 | 6.908603  | -1.064809 |
| H | 1.383099 | 6.522957  | 2.218407  | S | 1.393208  | 3.009473  | 1.856825  |

-----

## 2a-INT2

Zero-point correction= 1.069180

(Hartree/Particle)

Thermal correction to Energy= 1.136198

Thermal correction to Enthalpy=1.137142

Thermal correction to Gibbs Free Energy=0.962215

E(Solv) = -4116.08309942

|   |          |           |           |   |           |           |           |
|---|----------|-----------|-----------|---|-----------|-----------|-----------|
| C | 2.432504 | 0.478853  | -2.023929 | H | 5.713065  | -1.938383 | 2.011753  |
| H | 2.652920 | -0.574565 | -1.843757 | H | 3.279373  | 1.981924  | 4.008208  |
| C | 4.388436 | 0.153024  | 4.393642  | H | 3.354748  | 2.376116  | -1.570050 |
| C | 5.057696 | -0.952351 | 3.837015  | H | -0.584861 | 4.828111  | 2.797771  |

|    |           |           |           |   |           |           |           |
|----|-----------|-----------|-----------|---|-----------|-----------|-----------|
| H  | -2.163939 | 6.352401  | 1.612468  | P | 0.313835  | -2.396641 | -0.353392 |
| H  | -0.136387 | 5.546522  | -2.084229 | C | -3.360345 | 0.754100  | 1.259606  |
| H  | 1.415585  | 4.004504  | -0.884675 | C | -2.434760 | 1.465351  | 2.037875  |
| H  | -3.016363 | 6.291201  | -1.573903 | C | -4.692149 | 1.184607  | 1.203978  |
| H  | -2.793224 | 7.584071  | -0.384393 | C | -2.847860 | 2.575384  | 2.773763  |
| H  | -1.768863 | 7.515684  | -1.830412 | H | -1.380953 | 1.204187  | 2.047019  |
| H  | 5.818622  | 2.881067  | -1.488808 | C | -5.094553 | 2.306004  | 1.930131  |
| H  | 7.934824  | 2.639573  | -2.755204 | H | -5.411782 | 0.663620  | 0.583433  |
| H  | 8.243233  | 0.718657  | -4.310501 | C | -4.176676 | 3.000324  | 2.720322  |
| H  | 6.409669  | -0.940634 | -4.586304 | H | -2.116236 | 3.110679  | 3.369145  |
| H  | 4.308753  | -0.689005 | -3.330851 | H | -6.127218 | 2.638777  | 1.871887  |
| C  | 1.184101  | 0.891222  | -1.306902 | H | -4.493661 | 3.873769  | 3.283339  |
| C  | 0.066316  | 1.437569  | -1.944968 | C | -4.137363 | -1.141102 | -0.790641 |
| C  | -1.058225 | 1.849935  | -1.186181 | C | -4.019231 | -0.808960 | -2.145931 |
| H  | -0.860050 | 2.161336  | -0.164433 | C | -5.314346 | -1.756008 | -0.337322 |
| C  | -2.291879 | 2.381463  | -1.779475 | C | -5.054161 | -1.088114 | -3.037622 |
| C  | -2.661726 | 2.149360  | -3.116595 | H | -3.114873 | -0.324594 | -2.495709 |
| C  | -3.137305 | 3.168835  | -0.980969 | C | -6.345790 | -2.042458 | -1.230935 |
| C  | -3.841942 | 2.676021  | -3.632651 | H | -5.418450 | -2.017486 | 0.710526  |
| H  | -2.027708 | 1.539948  | -3.755095 | C | -6.217351 | -1.710593 | -2.582084 |
| C  | -4.321598 | 3.691342  | -1.496249 | H | -4.950828 | -0.816197 | -4.084011 |
| H  | -2.853983 | 3.375858  | 0.044152  | H | -7.250885 | -2.523769 | -0.871757 |
| C  | -4.681667 | 3.446209  | -2.822451 | H | -7.023109 | -1.934450 | -3.275351 |
| H  | -4.110611 | 2.483985  | -4.667902 | C | -2.759285 | -2.043751 | 1.596283  |
| H  | -4.963536 | 4.287793  | -0.854516 | C | -2.353086 | -1.762470 | 2.909288  |
| H  | -5.605674 | 3.852152  | -3.224149 | C | -3.076458 | -3.366280 | 1.252978  |
| H  | 0.010164  | 1.400773  | -3.032070 | C | -2.280174 | -2.779565 | 3.857695  |
| H  | 1.296381  | 1.105757  | -0.244867 | H | -2.091210 | -0.751326 | 3.195662  |
| H  | 2.316355  | 0.608618  | -3.107431 | C | -3.001499 | -4.381660 | 2.206028  |
| Pd | -0.694930 | -0.311849 | -0.747946 | H | -3.388555 | -3.610323 | 0.246124  |
| P  | -2.757955 | -0.706824 | 0.331701  | C | -2.605666 | -4.091468 | 3.510983  |

|   |           |           |           |
|---|-----------|-----------|-----------|
| H | -1.953451 | -2.544933 | 4.865659  |
| H | -3.252282 | -5.399335 | 1.920413  |
| H | -2.542860 | -4.882961 | 4.252334  |
| C | 0.608917  | -2.554624 | 1.442923  |
| C | 0.575967  | -3.756710 | 2.159684  |
| C | 0.970638  | -1.366654 | 2.101328  |
| C | 0.921509  | -3.771908 | 3.510339  |
| H | 0.256469  | -4.674829 | 1.683966  |
| C | 1.318341  | -1.389691 | 3.450850  |
| H | 0.979271  | -0.411719 | 1.585056  |
| C | 1.303969  | -2.593700 | 4.154570  |
| H | 0.885915  | -4.708454 | 4.060113  |
| H | 1.612782  | -0.464258 | 3.931176  |
| H | 1.584943  | -2.613276 | 5.203834  |
| C | 1.944708  | -2.794889 | -1.092221 |
| C | 3.131125  | -2.693073 | -0.357079 |
| C | 2.003233  | -3.142455 | -2.452774 |
| C | 4.358593  | -2.942503 | -0.973808 |
| H | 3.105474  | -2.402072 | 0.686515  |
| C | 3.229646  | -3.398653 | -3.060055 |
| H | 1.087112  | -3.220020 | -3.031428 |
| C | 4.411902  | -3.299602 | -2.319391 |
| H | 5.273662  | -2.831852 | -0.402289 |
| H | 3.264467  | -3.671686 | -4.111088 |
| H | 5.370474  | -3.482021 | -2.795853 |
| C | -0.677062 | -3.802335 | -0.990081 |
| C | -0.317273 | -5.143069 | -0.783805 |
| C | -1.790954 | -3.517675 | -1.788524 |
| C | -1.107779 | -6.169632 | -1.297315 |
| H | 0.590942  | -5.385667 | -0.243103 |
| C | -2.577157 | -4.543206 | -2.314814 |

|   |           |           |           |
|---|-----------|-----------|-----------|
| H | -2.047673 | -2.485185 | -1.988049 |
| C | -2.246238 | -5.872712 | -2.053110 |
| H | -0.828503 | -7.204081 | -1.118793 |
| H | -3.446669 | -4.295749 | -2.917122 |
| H | -2.858318 | -6.676895 | -2.451387 |

-----  
**2a-INT2'**

Zero-point correction=1.068496  
(Hartree/Particle)

Thermal correction to Energy=1.135904

Thermal correction to Enthalpy=1.136849

Thermal correction to Gibbs Free Energy=  
0.959122

E(Solv) = -4116.07921471

|   |          |           |           |
|---|----------|-----------|-----------|
| C | 2.367280 | 0.213690  | -2.115138 |
| H | 2.216706 | 1.295094  | -2.181399 |
| C | 2.259646 | -5.615619 | 0.430621  |
| C | 2.371158 | -5.831221 | -0.955931 |
| C | 2.826935 | -4.824878 | -1.808534 |
| C | 3.147170 | -3.608314 | -1.218956 |
| C | 3.049046 | -3.365743 | 0.163315  |
| C | 2.596472 | -4.391912 | 1.005940  |
| O | 3.562142 | -2.480976 | -1.877043 |
| C | 3.711526 | -1.485944 | -0.904427 |
| C | 3.420120 | -1.967278 | 0.350287  |
| C | 3.725532 | -0.066161 | -1.372328 |
| N | 3.474944 | -1.204206 | 1.513346  |
| C | 2.708087 | 0.156617  | 3.598082  |
| C | 3.970265 | 0.742612  | 3.562989  |
| C | 4.266729 | 1.779911  | 4.450272  |

|   |          |           |           |    |           |           |           |
|---|----------|-----------|-----------|----|-----------|-----------|-----------|
| C | 3.320962 | 2.239685  | 5.373525  | C  | 0.576965  | -1.583600 | -1.715874 |
| C | 2.059313 | 1.625240  | 5.395218  | C  | -0.236088 | -2.266047 | -0.773467 |
| C | 1.750658 | 0.588901  | 4.519780  | H  | 0.139326  | -2.307463 | 0.245571  |
| C | 3.651807 | 3.348898  | 6.341956  | C  | -1.169047 | -3.334574 | -1.162614 |
| S | 2.211483 | -1.127319 | 2.451806  | C  | -2.021479 | -3.206840 | -2.271676 |
| O | 1.844884 | -2.321918 | 3.263039  | C  | -1.216712 | -4.512158 | -0.404464 |
| O | 0.981620 | -0.556129 | 1.766553  | C  | -2.902140 | -4.230072 | -2.611345 |
| C | 4.898446 | 0.413750  | -2.202775 | H  | -2.010233 | -2.283759 | -2.845763 |
| C | 5.185736 | 1.785590  | -2.227561 | C  | -2.092949 | -5.538864 | -0.749042 |
| C | 6.227257 | 2.283227  | -3.008954 | H  | -0.559700 | -4.614930 | 0.451685  |
| C | 7.001346 | 1.412179  | -3.778916 | C  | -2.940206 | -5.401734 | -1.849435 |
| C | 6.722541 | 0.045131  | -3.759398 | H  | -3.565673 | -4.111950 | -3.463791 |
| C | 5.676773 | -0.451962 | -2.979057 | H  | -2.120060 | -6.443467 | -0.148391 |
| H | 1.901874 | -6.422682 | 1.064349  | H  | -3.630568 | -6.198911 | -2.110993 |
| H | 2.091643 | -6.794545 | -1.372823 | H  | 0.510823  | -1.828221 | -2.775260 |
| H | 2.914476 | -4.971366 | -2.880300 | H  | 1.443745  | -0.362113 | -0.222783 |
| H | 2.492279 | -4.210154 | 2.069406  | H  | 2.410289  | -0.188945 | -3.132826 |
| H | 3.695723 | 0.518855  | -0.445546 | Pd | -0.856345 | -0.140029 | -0.759819 |
| H | 4.688596 | 0.387460  | 2.833607  | P  | -0.839603 | 2.158337  | -1.143172 |
| H | 5.251122 | 2.241071  | 4.421270  | P  | -2.717047 | -0.461123 | 0.599849  |
| H | 1.312593 | 1.962652  | 6.110713  | C  | -0.924757 | 2.532240  | -2.939019 |
| H | 0.773743 | 0.117075  | 4.544687  | C  | -1.369297 | 3.772947  | -3.421343 |
| H | 2.820752 | 4.056647  | 6.439951  | C  | -0.509928 | 1.554086  | -3.854034 |
| H | 3.856994 | 2.951111  | 7.344423  | C  | -1.385784 | 4.030615  | -4.791779 |
| H | 4.537391 | 3.907279  | 6.022588  | H  | -1.709334 | 4.532382  | -2.724805 |
| H | 4.587388 | 2.463700  | -1.623220 | C  | -0.525165 | 1.814481  | -5.224351 |
| H | 6.439704 | 3.349340  | -3.011874 | H  | -0.177668 | 0.589601  | -3.485617 |
| H | 7.816741 | 1.796027  | -4.386033 | C  | -0.962520 | 3.053276  | -5.695389 |
| H | 7.322293 | -0.640445 | -4.352348 | H  | -1.731069 | 4.994781  | -5.154067 |
| H | 5.462382 | -1.515037 | -2.968105 | H  | -0.199262 | 1.048412  | -5.922085 |
| C | 1.311255 | -0.470728 | -1.297509 | H  | -0.977847 | 3.255804  | -6.762426 |



|   |           |           |           |                                       |           |                     |           |
|---|-----------|-----------|-----------|---------------------------------------|-----------|---------------------|-----------|
| C | -2.168787 | 3.220150  | -0.464364 | H                                     | -5.424231 | -0.048549           | -3.492196 |
| C | -1.927731 | 4.159677  | 0.543166  | H                                     | -7.616723 | -0.263496           | -2.337442 |
| C | -3.471391 | 3.067147  | -0.964930 | C                                     | -2.779292 | 0.844041            | 1.897345  |
| C | -2.973122 | 4.944960  | 1.031488  | C                                     | -1.585176 | 1.109280            | 2.589893  |
| H | -0.928079 | 4.276313  | 0.946596  | C                                     | -3.920465 | 1.598155            | 2.191947  |
| C | -4.510675 | 3.854857  | -0.477842 | C                                     | -1.549918 | 2.090347            | 3.579256  |
| H | -3.671506 | 2.337990  | -1.742207 | H                                     | -0.680120 | 0.557916            | 2.355739  |
| C | -4.262095 | 4.800735  | 0.519771  | C                                     | -3.878521 | 2.576791            | 3.186000  |
| H | -2.776206 | 5.667754  | 1.817695  | H                                     | -4.836537 | 1.450834            | 1.634277  |
| H | -5.513286 | 3.727022  | -0.876093 | C                                     | -2.698599 | 2.821226            | 3.887091  |
| H | -5.071937 | 5.415995  | 0.901555  | H                                     | -0.615283 | 2.284887            | 4.097468  |
| C | 0.716270  | 2.940421  | -0.570293 | H                                     | -4.770445 | 3.159540            | 3.397400  |
| C | 1.307772  | 4.015764  | -1.248669 | H                                     | -2.669916 | 3.588253            | 4.656207  |
| C | 1.339747  | 2.415970  | 0.572688  | C                                     | -2.709342 | -2.039836           | 1.540238  |
| C | 2.506678  | 4.559477  | -0.786999 | C                                     | -1.595271 | -2.302803           | 2.355040  |
| H | 0.844826  | 4.417047  | -2.143947 | C                                     | -3.706037 | -3.013847           | 1.407086  |
| C | 2.533271  | 2.970541  | 1.036916  | C                                     | -1.499128 | -3.505887           | 3.049860  |
| H | 0.927942  | 1.551892  | 1.082387  | H                                     | -0.770762 | -1.602120           | 2.415249  |
| C | 3.118351  | 4.040540  | 0.357066  | C                                     | -3.608348 | -4.214676           | 2.113149  |
| H | 2.964745  | 5.384861  | -1.324789 | H                                     | -4.545935 | -2.856635           | 0.740918  |
| H | 3.007282  | 2.549591  | 1.917139  | C                                     | -2.513115 | -4.460992           | 2.940648  |
| H | 4.054830  | 4.462315  | 0.711300  | H                                     | -0.612048 | -3.686237           | 3.649415  |
| C | -4.311161 | -0.414164 | -0.288234 | H                                     | -4.386230 | -4.964341           | 1.997863  |
| C | -5.552804 | -0.553927 | 0.352411  | H                                     | -2.438850 | -5.401376           | 3.479991  |
| C | -4.280067 | -0.240993 | -1.679128 | -----                                 |           |                     |           |
| C | -6.736016 | -0.495626 | -0.383200 |                                       |           |                     |           |
| H | -5.593203 | -0.716362 | 1.424673  |                                       |           |                     |           |
| C | -5.463666 | -0.185435 | -2.415290 | <b>diene-Pd-<i>exo</i>-TS</b>         |           |                     |           |
| H | -3.317682 | -0.146851 | -2.174860 | Zero-point                            |           | correction=1.068229 |           |
| C | -6.693423 | -0.307338 | -1.766863 | (Hartree/Particle)                    |           |                     |           |
| H | -7.691074 | -0.601577 | 0.123185  | Thermal correction to Energy=1.134899 |           |                     |           |

|                                          |           |           |           |   |           |           |           |
|------------------------------------------|-----------|-----------|-----------|---|-----------|-----------|-----------|
| Thermal correction to Enthalpy=1.135843  |           |           |           | C | 5.583132  | -2.716281 | -0.793095 |
| Thermal correction to Gibbs Free Energy= |           |           |           | C | 4.786963  | -1.615757 | -0.483201 |
| 0.961008                                 |           |           |           | H | 2.956706  | 3.414264  | 5.504825  |
| E(Solv) = -4116.05953140                 |           |           |           | H | 4.398942  | 1.460002  | 5.972024  |
| C                                        | 2.475012  | 0.399318  | -1.391204 | H | 5.251719  | 0.033889  | 4.090311  |
| H                                        | 2.325268  | -0.648113 | -1.121013 | H | 2.312330  | 4.005371  | 3.186082  |
| C                                        | 3.306996  | 2.802896  | 4.678022  | H | 4.257051  | 1.582854  | -1.587023 |
| C                                        | 4.127776  | 1.692778  | 4.946241  | H | -1.137945 | 5.089562  | 0.012750  |
| C                                        | 4.607119  | 0.888478  | 3.911664  | H | -2.453775 | 5.541654  | -2.042567 |
| C                                        | 4.222728  | 1.236329  | 2.623569  | H | 0.939768  | 4.467899  | -4.442131 |
| C                                        | 3.394078  | 2.340579  | 2.321521  | H | 2.261776  | 4.039220  | -2.373030 |
| C                                        | 2.936638  | 3.142769  | 3.378743  | H | -2.433889 | 4.391806  | -4.700950 |
| O                                        | 4.573909  | 0.555201  | 1.485492  | H | -2.246818 | 6.145469  | -4.614366 |
| C                                        | 3.968079  | 1.227391  | 0.441978  | H | -1.082404 | 5.177665  | -5.537222 |
| C                                        | 3.250282  | 2.313997  | 0.868744  | H | 5.773557  | 0.484367  | -2.958851 |
| C                                        | 3.951464  | 0.736753  | -0.959001 | H | 7.185943  | -1.470524 | -3.520741 |
| N                                        | 2.488506  | 2.983129  | -0.080538 | H | 7.074772  | -3.529825 | -2.127125 |
| C                                        | 0.637964  | 4.551670  | -1.068914 | H | 5.523026  | -3.608955 | -0.175991 |
| C                                        | -0.682020 | 4.991775  | -0.966172 | H | 4.117054  | -1.663184 | 0.367062  |
| C                                        | -1.414212 | 5.236253  | -2.122855 | C | 1.341629  | 1.150963  | -0.763858 |
| C                                        | -0.852450 | 5.030471  | -3.389249 | C | 0.144945  | 1.383472  | -1.483647 |
| C                                        | 0.484570  | 4.620191  | -3.466430 | C | -1.049960 | 1.788753  | -0.820070 |
| C                                        | 1.237563  | 4.387405  | -2.315691 | H | -0.933304 | 2.275949  | 0.140470  |
| C                                        | -1.693823 | 5.199275  | -4.629678 | C | -2.319514 | 2.051136  | -1.509153 |
| S                                        | 1.498708  | 4.171319  | 0.450719  | C | -2.588035 | 1.584272  | -2.810141 |
| O                                        | 2.252548  | 5.351203  | 0.917000  | C | -3.337210 | 2.747853  | -0.829840 |
| O                                        | 0.458756  | 3.671153  | 1.393962  | C | -3.830060 | 1.800630  | -3.404366 |
| C                                        | 4.849461  | -0.447294 | -1.256087 | H | -1.822998 | 1.037905  | -3.352857 |
| C                                        | 5.718610  | -0.414671 | -2.349921 | C | -4.578771 | 2.956229  | -1.421677 |
| C                                        | 6.514502  | -1.517574 | -2.667674 | H | -3.142424 | 3.121326  | 0.169067  |
| C                                        | 6.451008  | -2.672810 | -1.887763 | C | -4.834580 | 2.483703  | -2.712552 |

|    |           |           |           |   |           |           |           |
|----|-----------|-----------|-----------|---|-----------|-----------|-----------|
| H  | -4.016761 | 1.429833  | -4.408817 | C | -1.805366 | -1.521086 | 2.725583  |
| H  | -5.349630 | 3.490084  | -0.872830 | C | -1.337623 | -0.947142 | 3.915227  |
| H  | -5.803469 | 2.647923  | -3.175362 | C | -1.603082 | -2.894769 | 2.510987  |
| H  | 0.178714  | 1.308059  | -2.566600 | C | -0.667081 | -1.727013 | 4.859229  |
| H  | 1.259857  | 1.100223  | 0.313714  | H | -1.487335 | 0.109688  | 4.104367  |
| H  | 2.405763  | 0.440468  | -2.483190 | C | -0.947362 | -3.672439 | 3.460784  |
| Pd | -0.990246 | -0.378756 | -0.430809 | H | -1.946800 | -3.358745 | 1.593513  |
| P  | -2.472370 | -0.494042 | 1.357218  | C | -0.465965 | -3.088464 | 4.634167  |
| P  | -0.068935 | -2.494291 | -0.856219 | H | -0.300712 | -1.263742 | 5.770953  |
| C  | -2.933432 | 1.097148  | 2.138319  | H | -0.787579 | -4.729129 | 3.269299  |
| C  | -1.913609 | 2.017638  | 2.427718  | H | 0.065229  | -3.690975 | 5.365213  |
| C  | -4.268485 | 1.469973  | 2.346635  | C | 1.044215  | -2.985747 | 0.522057  |
| C  | -2.219718 | 3.288953  | 2.910784  | C | 1.470761  | -4.298518 | 0.760248  |
| H  | -0.873867 | 1.769842  | 2.243531  | C | 1.489726  | -1.961570 | 1.373201  |
| C  | -4.574031 | 2.743671  | 2.828073  | C | 2.341508  | -4.573750 | 1.815963  |
| H  | -5.068483 | 0.774351  | 2.118389  | H | 1.115740  | -5.108762 | 0.132010  |
| C  | -3.553482 | 3.655514  | 3.106903  | C | 2.362559  | -2.233602 | 2.424833  |
| H  | -1.409754 | 3.987979  | 3.086996  | H | 1.129425  | -0.949669 | 1.219845  |
| H  | -5.612826 | 3.024927  | 2.978531  | C | 2.792919  | -3.543652 | 2.644382  |
| H  | -3.796879 | 4.650955  | 3.467786  | H | 2.665713  | -5.595686 | 1.992788  |
| C  | -4.084138 | -1.235224 | 0.902745  | H | 2.698739  | -1.425343 | 3.067321  |
| C  | -4.630490 | -0.855506 | -0.335665 | H | 3.470528  | -3.763259 | 3.464502  |
| C  | -4.759734 | -2.170844 | 1.695250  | C | 1.025117  | -2.483788 | -2.334214 |
| C  | -5.832806 | -1.408011 | -0.770691 | C | 2.325034  | -3.000417 | -2.345505 |
| H  | -4.105666 | -0.137078 | -0.958653 | C | 0.532605  | -1.843337 | -3.483186 |
| C  | -5.956799 | -2.734471 | 1.247670  | C | 3.129314  | -2.861898 | -3.479301 |
| H  | -4.343849 | -2.468884 | 2.652087  | H | 2.731070  | -3.473328 | -1.459200 |
| C  | -6.494264 | -2.355606 | 0.016078  | C | 1.327225  | -1.724418 | -4.620133 |
| H  | -6.246038 | -1.105477 | -1.728501 | H | -0.468749 | -1.419444 | -3.468855 |
| H  | -6.470242 | -3.466862 | 1.864457  | C | 2.633451  | -2.225477 | -4.615555 |
| H  | -7.425333 | -2.796007 | -0.329524 | H | 4.151170  | -3.224863 | -3.454313 |

|                                          |                |           |           |   |           |           |           |
|------------------------------------------|----------------|-----------|-----------|---|-----------|-----------|-----------|
| H                                        | 0.936878       | -1.226057 | -5.503346 | O | -2.982157 | 1.823730  | 2.482344  |
| H                                        | 3.263996       | -2.108570 | -5.492310 | C | -3.339783 | 1.662079  | 1.139650  |
| C                                        | -1.135070      | -3.950513 | -1.201358 | C | -3.756310 | 0.368699  | 0.883282  |
| C                                        | -0.641514      | -5.115980 | -1.808677 | C | -2.898929 | 2.643659  | 0.125251  |
| C                                        | -2.495774      | -3.877315 | -0.876135 | N | -3.914863 | -0.281351 | -0.313939 |
| C                                        | -1.487153      | -6.200004 | -2.040426 | C | -5.945633 | -0.897638 | -1.901577 |
| H                                        | 0.397630       | -5.165205 | -2.119937 | C | -5.619326 | -2.103440 | -2.524105 |
| C                                        | -3.342410      | -4.962146 | -1.108441 | C | -6.605758 | -3.068646 | -2.704672 |
| H                                        | -2.897265      | -2.963564 | -0.457547 | C | -7.923001 | -2.847367 | -2.276608 |
| C                                        | -2.836902      | -6.128241 | -1.683681 | C | -8.225835 | -1.628208 | -1.658892 |
| H                                        | -1.095167      | -7.098625 | -2.508678 | C | -7.247116 | -0.653011 | -1.468989 |
| H                                        | -4.393526      | -4.882498 | -0.846842 | C | -8.992718 | -3.887373 | -2.507361 |
| H                                        | -3.492730      | -6.974236 | -1.869303 | S | -4.666901 | 0.326059  | -1.602373 |
| -----                                    |                |           |           | O | -3.763500 | 0.257494  | -2.777492 |
| <b>diene-Pd-endo-TS</b>                  |                |           |           | O | -5.370333 | 1.612790  | -1.366828 |
| Zero-point                               | correction=    | 1.066491  |           | C | -2.619783 | 4.063741  | 0.573008  |
| (Hartree/Particle)                       |                |           |           | C | -3.216106 | 5.127033  | -0.112338 |
| Thermal correction to Energy=            | 1.133862       |           |           | C | -2.878061 | 6.449835  | 0.182920  |
| Thermal correction to Enthalpy=          | 1.134806       |           |           | C | -1.929708 | 6.727635  | 1.168298  |
| Thermal correction to Gibbs Free Energy= | 0.954264       |           |           | C | -1.332671 | 5.672435  | 1.864197  |
| E(Solv) =                                | -4116.04662314 |           |           | H | -1.676637 | 4.354960  | 1.569436  |
| C                                        | -1.553581      | 2.145838  | -0.606189 | H | -3.681905 | -3.028062 | 4.199930  |
| H                                        | -1.484535      | 2.703343  | -1.539959 | H | -2.882527 | -1.334386 | 5.813139  |
| C                                        | -3.557581      | -2.000217 | 3.872430  | H | -2.540483 | 1.044380  | 5.105894  |
| C                                        | -3.096030      | -1.037788 | 4.789957  | H | -4.189001 | -2.395483 | 1.834643  |
| C                                        | -2.898438      | 0.292081  | 4.409683  | H | -3.671847 | 2.666806  | -0.642065 |
| C                                        | -3.171828      | 0.606408  | 3.084041  | H | -4.604081 | -2.267462 | -2.868811 |
| C                                        | -3.651867      | -0.332182 | 2.153645  | H | -6.354157 | -4.009229 | -3.190045 |
| C                                        | -3.842797      | -1.659312 | 2.552401  | H | -9.242815 | -1.438653 | -1.323195 |
|                                          |                |           |           | H | -7.478830 | 0.295542  | -0.997197 |
|                                          |                |           |           | H | -8.596105 | -4.902489 | -2.393732 |

|    |           |           |           |   |           |           |           |
|----|-----------|-----------|-----------|---|-----------|-----------|-----------|
| H  | -9.824709 | -3.767681 | -1.805631 | C | 3.213432  | 3.945575  | 2.839540  |
| H  | -9.407267 | -3.813641 | -3.521825 | H | 4.027644  | 3.697464  | 0.861602  |
| H  | -3.944070 | 4.911308  | -0.889816 | C | 1.258312  | 2.622836  | 3.359787  |
| H  | -3.353758 | 7.261645  | -0.360952 | H | 0.557975  | 1.339249  | 1.783677  |
| H  | -1.662140 | 7.755795  | 1.397098  | C | 2.217047  | 3.563246  | 3.741494  |
| H  | -0.594746 | 5.873573  | 2.636783  | H | 3.961834  | 4.675928  | 3.133654  |
| H  | -1.205842 | 3.544708  | 2.113177  | H | 0.475943  | 2.318794  | 4.049246  |
| C  | -1.375851 | 0.696244  | -0.842198 | H | 2.190049  | 3.995405  | 4.737623  |
| C  | -1.040919 | -0.162368 | 0.206819  | C | 4.004162  | 1.882556  | -1.058888 |
| C  | -0.768099 | -1.541302 | 0.024110  | C | 4.401496  | 2.659424  | -2.153149 |
| H  | -1.077137 | -1.977264 | -0.924103 | C | 4.968742  | 1.137390  | -0.361893 |
| C  | -0.713453 | -2.463975 | 1.164146  | C | 5.740939  | 2.684445  | -2.548333 |
| C  | -0.110123 | -2.109855 | 2.383682  | H | 3.668386  | 3.246771  | -2.695113 |
| C  | -1.305728 | -3.731344 | 1.054228  | C | 6.303043  | 1.169848  | -0.753950 |
| C  | -0.090420 | -2.998322 | 3.452124  | H | 4.674887  | 0.526355  | 0.485637  |
| H  | 0.367483  | -1.140837 | 2.481992  | C | 6.692423  | 1.940449  | -1.852665 |
| C  | -1.302309 | -4.616312 | 2.130948  | H | 6.037518  | 3.290789  | -3.399677 |
| H  | -1.775717 | -4.014440 | 0.117165  | H | 7.036001  | 0.579358  | -0.212994 |
| C  | -0.686515 | -4.258097 | 3.330819  | H | 7.732845  | 1.956880  | -2.164281 |
| H  | 0.392165  | -2.709802 | 4.381270  | C | 1.391098  | 3.031734  | -1.515706 |
| H  | -1.774785 | -5.589357 | 2.028838  | C | 0.996516  | 4.260730  | -0.972655 |
| H  | -0.673571 | -4.950516 | 4.167688  | C | 1.008305  | 2.706104  | -2.826800 |
| H  | -1.043727 | 0.235017  | 1.217450  | C | 0.218086  | 5.144088  | -1.722534 |
| H  | -1.560369 | 0.287377  | -1.830089 | H | 1.250939  | 4.514629  | 0.049538  |
| H  | -0.750690 | 2.488415  | 0.045231  | C | 0.259903  | 3.603308  | -3.585916 |
| Pd | 1.109298  | -0.340016 | -0.488482 | H | 1.272230  | 1.735647  | -3.240251 |
| P  | 2.251640  | 1.746369  | -0.533408 | C | -0.145310 | 4.820524  | -3.029557 |
| P  | 2.703521  | -2.036905 | -0.394639 | H | -0.128859 | 6.066288  | -1.267481 |
| C  | 2.290953  | 2.453361  | 1.164576  | H | -0.037070 | 3.338933  | -4.596470 |
| C  | 3.252188  | 3.395457  | 1.558017  | H | -0.761787 | 5.502400  | -3.607635 |
| C  | 1.299312  | 2.071428  | 2.079480  | C | 3.424738  | -2.161799 | 1.288999  |

|   |          |           |           |                                          |                     |           |           |
|---|----------|-----------|-----------|------------------------------------------|---------------------|-----------|-----------|
| C | 4.112337 | -3.298154 | 1.741555  | H                                        | 0.930462            | -7.317278 | -1.706772 |
| C | 3.274165 | -1.071385 | 2.157588  | -----                                    |                     |           |           |
| C | 4.646419 | -3.332369 | 3.029471  |                                          |                     |           |           |
| H | 4.208191 | -4.165666 | 1.096846  | <b>exo-Pd-16</b>                         |                     |           |           |
| C | 3.811213 | -1.103600 | 3.443866  | Zero-point                               | correction=1.070504 |           |           |
| H | 2.719163 | -0.200660 | 1.828510  | (Hartree/Particle)                       |                     |           |           |
| C | 4.499538 | -2.235650 | 3.882224  | Thermal correction to Energy=1.137113    |                     |           |           |
| H | 5.172677 | -4.219726 | 3.369581  | Thermal correction to Enthalpy=1.138057  |                     |           |           |
| H | 3.679186 | -0.248165 | 4.100279  | Thermal correction to Gibbs Free Energy= |                     |           |           |
| H | 4.913099 | -2.268532 | 4.886131  | 0.962391                                 |                     |           |           |
| C | 4.133905 | -1.779510 | -1.518873 | E(Solv) = -4116.10682805                 |                     |           |           |
| C | 3.932454 | -1.003917 | -2.668225 | C                                        | 2.531249            | -0.733242 | -0.394626 |
| C | 5.397779 | -2.334664 | -1.281764 | H                                        | 1.694565            | -1.424962 | -0.352816 |
| C | 4.974898 | -0.786461 | -3.567815 | C                                        | 6.234651            | 3.387071  | 3.310184  |
| H | 2.958444 | -0.553145 | -2.838151 | C                                        | 6.931150            | 2.330587  | 3.926159  |
| C | 6.441677 | -2.111678 | -2.177984 | C                                        | 6.692266            | 1.002565  | 3.571491  |
| H | 5.573218 | -2.927511 | -0.390717 | C                                        | 5.735724            | 0.788553  | 2.588785  |
| C | 6.232489 | -1.337266 | -3.321116 | C                                        | 5.026035            | 1.826389  | 1.953846  |
| H | 4.810340 | -0.170290 | -4.446386 | C                                        | 5.283529            | 3.152567  | 2.320835  |
| H | 7.420906 | -2.539514 | -1.981762 | O                                        | 5.335166            | -0.438840 | 2.107563  |
| H | 7.050103 | -1.157029 | -4.013081 | C                                        | 4.372721            | -0.186721 | 1.158161  |
| C | 2.202834 | -3.755989 | -0.787414 | C                                        | 4.146843            | 1.151329  | 1.020693  |
| C | 2.308100 | -4.231017 | -2.104523 | C                                        | 3.702952            | -1.312177 | 0.449515  |
| C | 1.622608 | -4.576523 | 0.191344  | N                                        | 3.116607            | 1.668573  | 0.194436  |
| C | 1.850211 | -5.505535 | -2.432363 | C                                        | 4.156050            | 1.326932  | -2.352924 |
| H | 2.758231 | -3.607631 | -2.870637 | C                                        | 3.311581            | 1.036145  | -3.422855 |
| C | 1.173179 | -5.854424 | -0.141733 | C                                        | 3.600470            | -0.058408 | -4.235729 |
| H | 1.522220 | -4.224818 | 1.211206  | C                                        | 4.713809            | -0.870522 | -3.984604 |
| C | 1.283996 | -6.322617 | -1.450682 | C                                        | 5.569711            | -0.528851 | -2.925924 |
| H | 1.941972 | -5.862848 | -3.454128 | C                                        | 5.304498            | 0.567419  | -2.111022 |
| H | 0.724031 | -6.474535 | 0.628057  | C                                        | 4.984668            | -2.096716 | -4.819323 |

|   |           |           |           |    |           |           |           |
|---|-----------|-----------|-----------|----|-----------|-----------|-----------|
| S | 3.670482  | 2.564965  | -1.162491 | C  | -0.810700 | 2.791953  | -2.729923 |
| O | 4.877073  | 3.253971  | -0.701616 | C  | -1.323126 | 4.198456  | -0.840229 |
| O | 2.544868  | 3.311036  | -1.718932 | C  | -1.561074 | 3.627862  | -3.553547 |
| C | 3.281237  | -2.430230 | 1.392598  | H  | -0.325353 | 1.919464  | -3.155486 |
| C | 4.038887  | -3.602631 | 1.457765  | C  | -2.080443 | 5.028809  | -1.662364 |
| C | 3.649677  | -4.664429 | 2.275296  | H  | -1.229667 | 4.424007  | 0.217194  |
| C | 2.489763  | -4.561833 | 3.043993  | C  | -2.208627 | 4.748077  | -3.024414 |
| C | 1.733185  | -3.389229 | 2.996523  | H  | -1.641265 | 3.403732  | -4.614265 |
| C | 2.128467  | -2.331037 | 2.178983  | H  | -2.572370 | 5.898799  | -1.235838 |
| H | 6.450900  | 4.408567  | 3.609371  | H  | -2.797225 | 5.396747  | -3.666883 |
| H | 7.670777  | 2.551364  | 4.690207  | H  | 1.001510  | 0.897659  | -1.891767 |
| H | 7.217546  | 0.174528  | 4.035242  | H  | 1.640441  | 0.572793  | 1.077961  |
| H | 4.767986  | 3.965943  | 1.824888  | H  | 2.830492  | -0.685902 | -1.441131 |
| H | 4.425748  | -1.750803 | -0.251876 | Pd | -1.127849 | 0.290907  | -0.213552 |
| H | 2.441577  | 1.658917  | -3.598507 | P  | -3.086991 | 1.064706  | 0.844190  |
| H | 2.947013  | -0.291179 | -5.072388 | P  | -1.354637 | -1.992647 | -0.637211 |
| H | 6.454942  | -1.131590 | -2.739365 | C  | -2.794841 | 2.591759  | 1.824390  |
| H | 5.967573  | 0.833935  | -1.296392 | C  | -1.621078 | 2.661184  | 2.591262  |
| H | 4.714149  | -3.006389 | -4.267923 | C  | -3.641958 | 3.705019  | 1.777006  |
| H | 4.405396  | -2.086810 | -5.747630 | C  | -1.301653 | 3.817929  | 3.299458  |
| H | 6.045396  | -2.179222 | -5.079959 | H  | -0.945665 | 1.809431  | 2.606257  |
| H | 4.935647  | -3.688028 | 0.849147  | C  | -3.314121 | 4.869779  | 2.473753  |
| H | 4.248514  | -5.570776 | 2.306788  | H  | -4.547199 | 3.669486  | 1.180775  |
| H | 2.175946  | -5.387983 | 3.675819  | C  | -2.145565 | 4.930383  | 3.234013  |
| H | 0.823134  | -3.306234 | 3.580378  | H  | -0.387121 | 3.858943  | 3.884309  |
| H | 1.520953  | -1.431549 | 2.136650  | H  | -3.971785 | 5.732838  | 2.417132  |
| C | 2.003125  | 0.642581  | 0.047309  | H  | -1.888842 | 5.840364  | 3.768728  |
| C | 0.871417  | 1.105745  | -0.834615 | C  | -4.462771 | 1.547559  | -0.277735 |
| C | 0.056890  | 2.173324  | -0.436834 | C  | -4.126832 | 2.051586  | -1.542746 |
| H | 0.223665  | 2.591025  | 0.553318  | C  | -5.815303 | 1.427745  | 0.073321  |
| C | -0.686030 | 3.054655  | -1.352747 | C  | -5.124489 | 2.426852  | -2.441270 |

|   |           |           |           |                                          |           |                     |           |
|---|-----------|-----------|-----------|------------------------------------------|-----------|---------------------|-----------|
| H | -3.085533 | 2.142609  | -1.826571 | C                                        | 0.531306  | -2.540500           | -2.606010 |
| C | -6.812131 | 1.796041  | -0.830988 | C                                        | 1.918933  | -4.484507           | -1.170235 |
| H | -6.088407 | 1.039028  | 1.048576  | H                                        | 0.427355  | -4.219057           | 0.354561  |
| C | -6.469475 | 2.294560  | -2.090221 | C                                        | 1.676153  | -3.116295           | -3.146508 |
| H | -4.842350 | 2.821179  | -3.412806 | H                                        | 0.004468  | -1.762525           | -3.153056 |
| H | -7.857064 | 1.693797  | -0.550946 | C                                        | 2.378843  | -4.087441           | -2.424441 |
| H | -7.248053 | 2.579556  | -2.792600 | H                                        | 2.463924  | -5.225295           | -0.594195 |
| C | -3.936028 | -0.045084 | 2.041710  | H                                        | 2.030887  | -2.799642           | -4.122865 |
| C | -3.966267 | 0.204414  | 3.418424  | H                                        | 3.279961  | -4.530368           | -2.840232 |
| C | -4.514847 | -1.229037 | 1.553450  | C                                        | -2.686972 | -2.433758           | -1.832575 |
| C | -4.560450 | -0.712266 | 4.290012  | C                                        | -2.732718 | -3.667038           | -2.500970 |
| H | -3.531212 | 1.116602  | 3.812693  | C                                        | -3.692199 | -1.490698           | -2.084420 |
| C | -5.118507 | -2.133184 | 2.420970  | C                                        | -3.781385 | -3.957425           | -3.373599 |
| H | -4.489383 | -1.445078 | 0.490276  | H                                        | -1.937963 | -4.391669           | -2.351936 |
| C | -5.138837 | -1.879909 | 3.795125  | C                                        | -4.742679 | -1.780297           | -2.955662 |
| H | -4.575671 | -0.505259 | 5.356767  | H                                        | -3.641311 | -0.520307           | -1.608154 |
| H | -5.552233 | -3.047125 | 2.026725  | C                                        | -4.791825 | -3.018145           | -3.597956 |
| H | -5.598767 | -2.592449 | 4.474041  | H                                        | -3.807061 | -4.916261           | -3.884321 |
| C | -1.777523 | -2.942401 | 0.882808  | H                                        | -5.508822 | -1.030871           | -3.133940 |
| C | -2.356584 | -4.218107 | 0.867276  | H                                        | -5.605314 | -3.248019           | -4.280516 |
| C | -1.526746 | -2.326291 | 2.116422  | -----                                    |           |                     |           |
| C | -2.671376 | -4.864599 | 2.062468  |                                          |           |                     |           |
| H | -2.574485 | -4.703333 | -0.078354 |                                          |           |                     |           |
| C | -1.845048 | -2.968909 | 3.311323  | <b>endo-Pd-17</b>                        |           |                     |           |
| H | -1.108093 | -1.323858 | 2.124510  | Zero-point                               |           | correction=1.069223 |           |
| C | -2.416513 | -4.241241 | 3.286004  | (Hartree/Particle)                       |           |                     |           |
| H | -3.122640 | -5.852810 | 2.038354  | Thermal correction to Energy=1.136377    |           |                     |           |
| H | -1.671793 | -2.465454 | 4.257652  | Thermal correction to Enthalpy=1.137321  |           |                     |           |
| H | -2.675951 | -4.740403 | 4.215409  | Thermal correction to Gibbs Free Energy= |           |                     |           |
| C | 0.060302  | -2.935164 | -1.341490 | 0.957708                                 |           |                     |           |
| C | 0.761091  | -3.916091 | -0.631094 | E(Solv) = -4116.08424089                 |           |                     |           |



|   |           |           |           |   |           |           |           |
|---|-----------|-----------|-----------|---|-----------|-----------|-----------|
| C | -1.669585 | 2.391514  | -1.377746 | H | -5.623588 | 2.221104  | 3.788899  |
| H | -1.904236 | 2.636011  | -2.416387 | H | -4.949601 | -1.689516 | 0.702741  |
| C | -5.838688 | -0.973891 | 2.539889  | H | -3.330058 | 3.754982  | -1.126764 |
| C | -6.036612 | 0.117204  | 3.405871  | H | -3.857216 | -2.515837 | -2.358537 |
| C | -5.491630 | 1.372041  | 3.126838  | H | -5.506294 | -4.217302 | -1.593092 |
| C | -4.757130 | 1.480162  | 1.955017  | H | -8.425516 | -1.119811 | -1.007709 |
| C | -4.558006 | 0.407202  | 1.060395  | H | -6.770720 | 0.580066  | -1.779440 |
| C | -5.103138 | -0.845864 | 1.364783  | H | -7.594968 | -4.639460 | -0.259310 |
| O | -4.103699 | 2.611672  | 1.509941  | H | -8.837440 | -3.379638 | -0.133393 |
| C | -3.497564 | 2.263516  | 0.327928  | H | -8.612287 | -4.257009 | -1.650949 |
| C | -3.749995 | 0.967408  | 0.003379  | H | -2.681991 | 5.900326  | -0.762576 |
| C | -2.654470 | 3.211599  | -0.454155 | H | -1.378296 | 7.612775  | 0.463977  |
| N | -3.110268 | 0.348193  | -1.101206 | H | 0.156202  | 6.926730  | 2.301478  |
| C | -5.236216 | -0.881554 | -2.111607 | H | 0.351359  | 4.519650  | 2.902386  |
| C | -4.860724 | -2.225715 | -2.066633 | H | -0.964427 | 2.825812  | 1.684693  |
| C | -5.788399 | -3.168436 | -1.636219 | C | -1.694529 | 0.858681  | -1.228274 |
| C | -7.082945 | -2.785541 | -1.249217 | C | -0.958002 | 0.273404  | -0.036725 |
| C | -7.430033 | -1.431063 | -1.312124 | C | -0.879010 | -1.142744 | 0.019781  |
| C | -6.514126 | -0.472427 | -1.742979 | H | -1.199818 | -1.664812 | -0.882290 |
| C | -8.083649 | -3.818533 | -0.794409 | C | -1.076230 | -1.940116 | 1.249150  |
| S | -4.011073 | 0.336342  | -2.552372 | C | -0.404484 | -1.677886 | 2.454865  |
| O | -3.112735 | -0.218751 | -3.573155 | C | -1.968493 | -3.024387 | 1.217697  |
| O | -4.697358 | 1.616065  | -2.792835 | C | -0.598073 | -2.480438 | 3.576367  |
| C | -1.916984 | 4.245744  | 0.375580  | H | 0.316217  | -0.868450 | 2.490784  |
| C | -2.021881 | 5.600086  | 0.047381  | C | -2.173286 | -3.823634 | 2.341278  |
| C | -1.282599 | 6.564594  | 0.734892  | H | -2.497542 | -3.240491 | 0.293402  |
| C | -0.424480 | 6.180953  | 1.765550  | C | -1.482263 | -3.562063 | 3.525863  |
| C | -0.318857 | 4.830520  | 2.107884  | H | -0.040938 | -2.272582 | 4.486091  |
| C | -1.060898 | 3.873348  | 1.418598  | H | -2.868043 | -4.658168 | 2.288728  |
| H | -6.267305 | -1.938470 | 2.796592  | H | -1.628446 | -4.192269 | 4.398536  |
| H | -6.618323 | -0.018612 | 4.312861  | H | -1.108270 | 0.804249  | 0.901403  |

|    |           |           |           |   |          |           |           |
|----|-----------|-----------|-----------|---|----------|-----------|-----------|
| H  | -1.303599 | 0.415784  | -2.144863 | H | 1.777577 | 4.484729  | 0.121097  |
| H  | -0.654488 | 2.734233  | -1.192431 | C | 0.981411 | 3.553129  | -3.558397 |
| Pd | 1.099658  | -0.336090 | -0.263789 | H | 1.685908 | 1.582561  | -3.056092 |
| P  | 2.452542  | 1.569889  | -0.303305 | C | 0.715611 | 4.842149  | -3.086228 |
| P  | 2.463326  | -2.239193 | -0.161066 | H | 0.782390 | 6.160184  | -1.380077 |
| C  | 2.581764  | 2.308740  | 1.379106  | H | 0.743357 | 3.286626  | -4.584217 |
| C  | 3.576795  | 3.236869  | 1.718139  | H | 0.269900 | 5.581173  | -3.745884 |
| C  | 1.683655  | 1.885262  | 2.367965  | C | 3.115155 | -2.534587 | 1.534720  |
| C  | 3.666150  | 3.731445  | 3.019179  | C | 3.545797 | -3.791336 | 1.984982  |
| H  | 4.287405  | 3.561575  | 0.964245  | C | 3.164330 | -1.448270 | 2.419690  |
| C  | 1.781829  | 2.365811  | 3.674364  | C | 4.026426 | -3.950016 | 3.284978  |
| H  | 0.914701  | 1.168260  | 2.101201  | H | 3.482471 | -4.651157 | 1.325727  |
| C  | 2.774513  | 3.291689  | 4.001576  | C | 3.647452 | -1.604282 | 3.718319  |
| H  | 4.439468  | 4.452034  | 3.270235  | H | 2.803306 | -0.480312 | 2.091940  |
| H  | 1.082265  | 2.020414  | 4.430530  | C | 4.080694 | -2.857520 | 4.153822  |
| H  | 2.855565  | 3.668341  | 5.017387  | H | 4.353257 | -4.929929 | 3.621902  |
| C  | 4.233675  | 1.480633  | -0.776403 | H | 3.672243 | -0.748058 | 4.386871  |
| C  | 4.779913  | 2.194957  | -1.848935 | H | 4.450888 | -2.986110 | 5.167136  |
| C  | 5.061374  | 0.607712  | -0.052083 | C | 3.959182 | -2.228121 | -1.232177 |
| C  | 6.123684  | 2.031609  | -2.195821 | C | 3.919297 | -1.424308 | -2.379740 |
| H  | 4.159659  | 2.880235  | -2.415994 | C | 5.118784 | -2.962650 | -0.954852 |
| C  | 6.400795  | 0.452164  | -0.393186 | C | 5.015223 | -1.357486 | -3.238318 |
| H  | 4.653092  | 0.037291  | 0.775541  | H | 3.029798 | -0.831649 | -2.575227 |
| C  | 6.935907  | 1.160560  | -1.472155 | C | 6.218975 | -2.889032 | -1.808490 |
| H  | 6.532680  | 2.590847  | -3.033102 | H | 5.170312 | -3.579307 | -0.063723 |
| H  | 7.020994  | -0.239384 | 0.168891  | C | 6.169174 | -2.087185 | -2.950698 |
| H  | 7.978468  | 1.028820  | -1.747569 | H | 4.977043 | -0.717575 | -4.114701 |
| C  | 1.831983  | 2.925142  | -1.370734 | H | 7.117836 | -3.455345 | -1.579768 |
| C  | 1.574069  | 4.220672  | -0.909488 | H | 7.031025 | -2.023986 | -3.609095 |
| C  | 1.523254  | 2.597860  | -2.702503 | C | 1.691528 | -3.853940 | -0.579568 |
| C  | 1.008454  | 5.170615  | -1.763166 | C | 1.840050 | -4.415587 | -1.855824 |

|   |           |           |           |
|---|-----------|-----------|-----------|
| C | 0.843357  | -4.481516 | 0.346724  |
| C | 1.155454  | -5.582040 | -2.198306 |
| H | 2.495759  | -3.943829 | -2.580855 |
| C | 0.164496  | -5.648720 | 0.001499  |
| H | 0.710806  | -4.060160 | 1.336422  |
| C | 0.316358  | -6.202643 | -1.271081 |
| H | 1.282968  | -6.007777 | -3.189906 |
| H | -0.491153 | -6.115623 | 0.730771  |
| H | -0.214781 | -7.111958 | -1.538698 |

-----
